# Supplementary material for: The group 9 cyclopentadienylmetal cis-ethylenedithiolates as metallodithiolene ligands in metal carbonyl chemistry: analogies to benzene metal carbonyl complexes
Source: Royal Society of Chemistry journal article supplement (doi:10.1039/c9nj02478f), 2019-01-01
Supplement: c9nj02478f1.pdf [file c9nj02478f1.pdf]

# The Group 9 Cyclopentadienylmetal *cis*-Ethylenedithiolates as Metallodithiolene Ligands in Metal Carbonyl Chemistry: Analogies to Benzene Metal Carbonyl Complexes

Luana-Flavia Radu,<sup>1</sup> Amr A. A. Attia,<sup>1</sup> Radu Silaghi-Dumitrescu,<sup>1</sup> Alexandru Lupan,<sup>1\*</sup> and  
R. Bruce King\*<sup>2</sup>

<sup>1</sup>*Faculty of Chemistry and Chemical Engineering, Babeş-Bolyai University, Cluj-Napoca,  
Romania*

<sup>2</sup>*Department of Chemistry, University of Georgia, Athens, Georgia, 30602*

## Supporting Information

**Table S1.** Initial structures.

**Table S2A.** Energy ranking for CpCoS<sub>2</sub>C<sub>2</sub>H<sub>2</sub>·Cr(CO)<sub>n</sub> structures.

**Table S2B.** Distance table for the lowest energy CpCoS<sub>2</sub>C<sub>2</sub>H<sub>2</sub>·Cr(CO)<sub>n</sub> structures.

**Table S3A.** Energy ranking for CpCoS<sub>2</sub>C<sub>2</sub>H<sub>2</sub>·Fe(CO)<sub>n</sub> structures.

**Table S3B.** Distance table for the lowest energy CpCoS<sub>2</sub>C<sub>2</sub>H<sub>2</sub>·Fe(CO)<sub>n</sub> structures.

**Table S4A.** Energy ranking for CpIrS<sub>2</sub>C<sub>2</sub>H<sub>2</sub>·Cr(CO)<sub>n</sub> structures.

**Table S4B.** Distance table for the lowest energy CpIrS<sub>2</sub>C<sub>2</sub>H<sub>2</sub>·Cr(CO)<sub>n</sub> structures.

**Table S5A.** Energy ranking for CpIrS<sub>2</sub>C<sub>2</sub>H<sub>2</sub>·Fe(CO)<sub>n</sub> structures.

**Table S5B.** Distance table for the lowest energy CpIrS<sub>2</sub>C<sub>2</sub>H<sub>2</sub>·Fe(CO)<sub>n</sub> structures.

**Table S6A.** Energy ranking for CpRhS<sub>2</sub>C<sub>2</sub>H<sub>2</sub>·Cr(CO)<sub>n</sub> structures.

**Table S6B.** Distance table for the lowest energy CpRhS<sub>2</sub>C<sub>2</sub>H<sub>2</sub>·Cr(CO)<sub>n</sub> structures.

**Table S7A.** Energy ranking for CpRhS<sub>2</sub>C<sub>2</sub>H<sub>2</sub>·Fe(CO)<sub>n</sub> structures.

**Table S7B.** Distance table for the lowest energy CpRhS<sub>2</sub>C<sub>2</sub>H<sub>2</sub>·Fe(CO)<sub>n</sub> structures.

**Table S8.** Harmonic  $\nu(\text{CO})$  vibrational frequencies and infrared intensities (in parentheses, in km/mol) for the CpMS<sub>2</sub>C<sub>2</sub>H<sub>2</sub>·M'(CO)<sub>n</sub> systems (M = Co, Rh, Ir; M' = Cr, Fe).

**Table S9.** Thermochemistry table for the CpH<sub>2</sub>CpMS<sub>2</sub>C<sub>2</sub>H<sub>2</sub>·M'(CO)<sub>n</sub> systems (M = Co, Rh, Ir; M' = Cr, Fe).

Complete Gaussian09 Reference (reference 19)

**Table S1.** Initial structures.

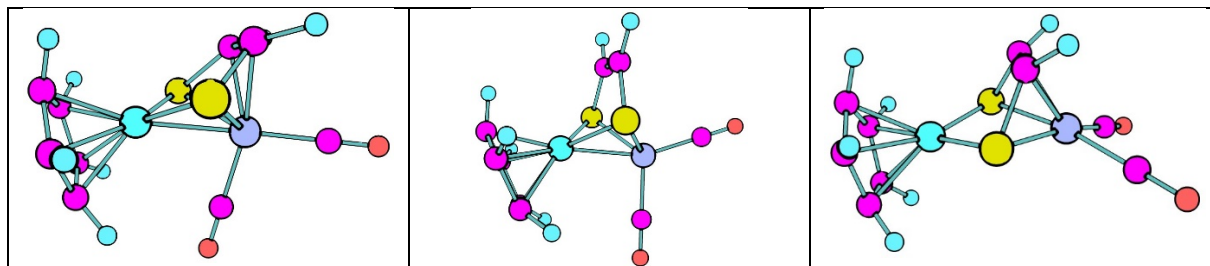

Metal 1 – Co, Rh, Ir

Metal 2 – Fe (n CO = 2 – 4), Cr (n CO = 2 – 5)

**Table S2A.** Energy rank for all of the CpCoS<sub>2</sub>C<sub>2</sub>H<sub>2</sub>·Cr(CO)<sub>n</sub> optimized structures. PBE0/6-311G(d,p).

Co-Cr

|     | name                                                   | E (a.u.)     | ΔE (kcal/mol) |
|-----|--------------------------------------------------------|--------------|---------------|
| 5-1 | 11-Co-Cr-CO-5-md2-freq                                 | -4059.649109 | 0.0           |
| 5-2 | 10-ir-Cr-CO-5-md1-new-Cr-Co-f-r-ok                     | -4059.643976 | 3.2           |
| 5-3 | 12-rh-Cr-CO-5-md3-freq-fneg2-fneg1-new-Co-Cr-c-freq-ok | -4059.621753 | 17.2          |
|     |                                                        |              |               |
| 4-1 | 8-Co-Cr-CO-4-md2-r1-freq                               | -3946.410367 | 0.0           |
| 4-2 | 7-Co-Cr-CO-4-md1-freq                                  | -3946.397991 | 7.8           |
| 4-3 | 9-Co-Cr-CO-4-md3-r1-freq                               | -3946.389313 | 13.2          |
|     |                                                        |              |               |
| 3-1 | 6-Co-Cr-CO-3-md3-r1-freq                               | -3833.185023 | 0.0           |
|     |                                                        |              |               |
| 2-1 | 3-Co-Cr-CO-2-md3-r1-freq-fneg2-freq                    | -3719.897911 | 0.0           |

**Table S2B.** Distance table for the lowest-lying CpCoS<sub>2</sub>C<sub>2</sub>H<sub>2</sub>·Cr(CO)<sub>n</sub> structures after PBE0/6-311G(d,p) optimization.

CpCoS<sub>2</sub>C<sub>2</sub>H<sub>2</sub>·Cr(CO)<sub>5</sub>

|                            |          |          |          |          |          |          |  |
|----------------------------|----------|----------|----------|----------|----------|----------|--|
| <p>1. -4059.649109 0.0</p> |          | 1        | 2        | 3        | 4        | 5        |  |
|                            | 1 Co     | 0.000000 |          |          |          |          |  |
|                            | 2 Cr     | 2.746065 | 0.000000 |          |          |          |  |
|                            | 3 C      | 3.571205 | 1.901191 | 0.000000 |          |          |  |
|                            | 4 C      | 3.148811 | 1.874175 | 3.774500 | 0.000000 |          |  |
|                            | 5 O      | 3.887152 | 3.017586 | 4.916598 | 1.144305 | 0.000000 |  |
|                            | 6 O      | 4.453047 | 3.039299 | 1.140793 | 4.910295 | 6.050357 |  |
|                            | 7 C      | 2.364520 | 1.889628 | 2.594577 | 2.773953 | 3.703171 |  |
|                            | 8 O      | 3.068556 | 3.017264 | 3.433551 | 3.708014 | 4.481094 |  |
|                            | 9 C      | 4.274001 | 1.896009 | 2.645695 | 2.665594 | 3.550695 |  |
|                            | 10 O     | 5.320085 | 3.034844 | 3.529056 | 3.570742 | 4.267618 |  |
|                            | 11 C     | 4.290073 | 1.835688 | 2.662724 | 2.560245 | 3.428323 |  |
|                            | 12 O     | 5.343143 | 2.982573 | 3.567997 | 3.439503 | 4.093249 |  |
|                            | 13 H     | 2.752994 | 5.069221 | 5.955879 | 4.884822 | 5.172162 |  |
|                            | 14 C     | 2.012948 | 4.508551 | 5.498319 | 4.278830 | 4.583772 |  |
|                            | 15 C     | 2.025783 | 4.748883 | 5.439303 | 4.841737 | 5.284983 |  |
|                            | 16 H     | 2.802861 | 4.007716 | 5.606289 | 2.896070 | 2.732279 |  |
|                            | 17 H     | 2.778900 | 5.477225 | 5.856491 | 5.806547 | 6.325742 |  |
|                            | 18 C     | 2.049692 | 4.322402 | 5.172021 | 4.293239 | 4.700905 |  |
|                            | 19 H     | 2.816913 | 4.763695 | 5.390480 | 4.912892 | 5.367583 |  |
|                            | 20 C     | 2.075303 | 3.784217 | 5.104655 | 3.209061 | 3.402619 |  |
|                            | 21 H     | 2.831995 | 3.764873 | 5.234413 | 2.926192 | 2.960912 |  |
|                            | 22 C     | 2.050935 | 3.904091 | 5.301408 | 3.183521 | 3.289566 |  |
|                            | 23 S     | 2.210413 | 3.709245 | 3.294945 | 4.921064 | 5.864602 |  |
|                            | 24 S     | 2.172606 | 2.424747 | 3.178181 | 3.008134 | 3.830598 |  |
|                            | 25 C     | 3.075280 | 3.869073 | 3.176042 | 5.224322 | 6.213352 |  |
|                            | 26 C     | 3.089260 | 3.430697 | 3.142518 | 4.586321 | 5.516916 |  |
|                            | 27 H     | 4.120545 | 4.137913 | 3.753008 | 5.240163 | 6.124902 |  |
| 28 H                       | 4.113667 | 4.802588 | 3.785834 | 6.262934 | 7.274002 |          |  |
|                            |          | 6        | 7        | 8        | 9        | 10       |  |
| 6 O                        | 0.000000 |          |          |          |          |          |  |
| 7 C                        | 3.486742 | 0.000000 |          |          |          |          |  |
| 8 O                        | 4.112234 | 1.157608 | 0.000000 |          |          |          |  |
| 9 C                        | 3.515536 | 3.766571 | 4.858483 | 0.000000 |          |          |  |
| 10 O                       | 4.198600 | 4.898333 | 5.975535 | 1.139163 | 0.000000 |          |  |
| 11 C                       | 3.526062 | 2.453514 | 3.135723 | 2.580868 | 3.460060 |          |  |
| 12 O                       | 4.234233 | 3.304418 | 3.691925 | 3.471852 | 4.148373 |          |  |
| 13 H                       | 6.762264 | 5.086180 | 5.714109 | 6.031128 | 6.824148 |          |  |
| 14 C                       | 6.358122 | 4.242997 | 4.772292 | 5.737058 | 6.647679 |          |  |
| 15 C                       | 6.170881 | 3.946924 | 4.176233 | 6.274424 | 7.290219 |          |  |
| 16 H                       | 6.677065 | 4.227053 | 4.930932 | 4.912127 | 5.713189 |          |  |
| 17 H                       | 6.427391 | 4.621141 | 4.756701 | 6.978715 | 7.977644 |          |  |
| 18 C                       | 5.969405 | 3.120598 | 3.105472 | 6.056598 | 7.147439 |          |  |
| 19 H                       | 6.072370 | 3.211059 | 2.805605 | 6.606243 | 7.731107 |          |  |

|  |    |   |          |          |          |          |          |
|--|----|---|----------|----------|----------|----------|----------|
|  | 20 | C | 6.081428 | 2.959068 | 3.216678 | 5.375511 | 6.421173 |
|  | 21 | H | 6.247008 | 2.873484 | 3.005424 | 5.344260 | 6.381458 |
|  | 22 | C | 6.311215 | 3.711149 | 4.284932 | 5.143625 | 6.070397 |
|  | 23 | S | 3.631382 | 3.173338 | 3.598699 | 5.077887 | 6.048955 |
|  | 24 | S | 4.063421 | 3.464048 | 4.534015 | 2.928002 | 3.716357 |
|  | 25 | C | 3.354110 | 4.147249 | 4.873668 | 4.608413 | 5.349869 |
|  | 26 | C | 3.570827 | 4.271399 | 5.221426 | 3.741811 | 4.356362 |
|  | 27 | H | 4.035869 | 5.228666 | 6.219638 | 3.965475 | 4.306575 |
|  | 28 | H | 3.642137 | 5.038757 | 5.668854 | 5.398890 | 6.035607 |
|  |    |   | 11       | 12       | 13       | 14       | 15       |
|  | 11 | C | 0.000000 |          |          |          |          |
|  | 12 | O | 1.146986 | 0.000000 |          |          |          |
|  | 13 | H | 6.750651 | 7.830579 | 0.000000 |          |          |
|  | 14 | C | 6.065042 | 7.097928 | 1.078263 | 0.000000 |          |
|  | 15 | C | 6.155308 | 7.125207 | 2.226201 | 1.414099 | 0.000000 |
|  | 16 | H | 5.281390 | 6.212643 | 2.696665 | 2.234519 | 3.331628 |
|  | 17 | H | 6.912771 | 7.886815 | 2.684713 | 2.233465 | 1.090359 |
|  | 18 | C | 5.392956 | 6.234148 | 3.338258 | 2.297843 | 1.414989 |
|  | 19 | H | 5.576453 | 6.294267 | 4.351091 | 3.344415 | 2.235933 |
|  | 20 | C | 4.779148 | 5.607850 | 3.332948 | 2.289980 | 2.281843 |
|  | 21 | H | 4.355711 | 5.024498 | 4.343101 | 3.333844 | 3.326803 |
|  | 22 | C | 5.238402 | 6.194066 | 2.241363 | 1.426808 | 2.291903 |
|  | 23 | S | 5.129163 | 6.127719 | 3.949269 | 3.547929 | 2.965939 |
|  | 24 | S | 4.246126 | 5.389454 | 3.247020 | 3.161610 | 3.844845 |
|  | 25 | C | 5.460975 | 6.523739 | 4.227764 | 4.209675 | 4.131762 |
|  | 26 | C | 5.149157 | 6.260570 | 3.977387 | 4.094540 | 4.449669 |
|  | 27 | H | 5.773153 | 6.852721 | 4.660977 | 4.947340 | 5.434710 |
|  | 28 | H | 6.278402 | 7.288322 | 5.080476 | 5.147744 | 4.965353 |
|  |    |   | 16       | 17       | 18       | 19       | 20       |
|  | 16 | H | 0.000000 |          |          |          |          |
|  | 17 | H | 4.351989 | 0.000000 |          |          |          |
|  | 18 | C | 3.337443 | 2.232837 | 0.000000 |          |          |
|  | 19 | H | 4.346739 | 2.694750 | 1.081834 | 0.000000 |          |
|  | 20 | C | 2.223903 | 3.335395 | 1.417060 | 2.231776 | 0.000000 |
|  | 21 | H | 2.674957 | 4.346125 | 2.228618 | 2.684581 | 1.081370 |
|  | 22 | C | 1.076520 | 3.346147 | 2.296873 | 3.340399 | 1.409175 |
|  | 23 | S | 4.949333 | 2.899136 | 3.303993 | 3.546590 | 4.033735 |
|  | 24 | S | 3.221790 | 4.433693 | 4.183129 | 4.985684 | 3.817974 |
|  | 25 | C | 5.388955 | 4.076647 | 4.716869 | 5.160417 | 5.141519 |
|  | 26 | C | 4.818001 | 4.644068 | 5.029324 | 5.668869 | 5.095591 |
|  | 27 | H | 5.520906 | 5.594787 | 6.078891 | 6.748233 | 6.069280 |
|  | 28 | H | 6.451121 | 4.718534 | 5.609229 | 5.952417 | 6.158704 |
|  |    |   | 21       | 22       | 23       | 24       | 25       |
|  | 21 | H | 0.000000 |          |          |          |          |
|  | 22 | C | 2.218391 | 0.000000 |          |          |          |
|  | 23 | S | 4.746343 | 4.159571 | 0.000000 |          |          |
|  | 24 | S | 4.372767 | 3.150924 | 3.137532 | 0.000000 |          |
|  | 25 | C | 5.856334 | 4.862502 | 1.733442 | 2.681023 | 0.000000 |
|  | 26 | C | 5.756691 | 4.549406 | 2.702157 | 1.750269 | 1.342269 |
|  | 27 | H | 6.708760 | 5.397602 | 3.723634 | 2.439700 | 2.144735 |

|                                                                                                               |                                                                                                                                                                                                                                                                                                                                                                                                                                                                                                                                                                                                                                                                                                                                                                                                                                                                                                                                                                                                                                                                                                                                                                                                                                                                                                                                                                                                                                                                                                                                                                                                                                                                                                                                                                                                                                                                                                                                                                                                                                                                                                                                                                                                                                                                                                                                                                                                                                                                                                                                                                                                                                                                                                                                                                                                                                                                                                                                                                                                                                                                                                                                                                                                                                                                                                                                                                                                                                                                                                                                                                                                                                                                                                                                                                                                                                                                                                                                                                                                                                                                                                                                                                                                                                                                                                                                                                                                                                                                                                                                                                                                                                                                                                                                                                                                                                                                                                                                                                                                                                         |          |          |          |          |          |          |      |          |    |    |  |  |      |          |          |  |  |  |      |          |          |          |  |  |      |          |          |          |          |  |     |          |          |          |          |          |     |          |          |          |          |          |     |          |          |          |          |          |     |          |          |          |          |          |     |          |          |          |          |          |      |          |          |          |          |          |      |          |          |          |          |          |      |          |          |          |          |          |      |          |          |          |          |          |      |          |          |          |          |          |      |          |          |          |          |          |      |          |          |          |          |          |      |          |          |          |          |          |      |          |          |          |          |          |      |          |          |          |          |          |      |          |          |          |          |          |      |          |          |          |          |          |      |          |          |          |          |          |      |          |          |          |          |          |      |          |          |          |          |          |      |          |          |          |          |          |      |          |          |          |          |          |      |          |          |          |          |          |      |          |          |          |          |          |  |   |   |   |   |    |     |          |  |  |  |  |     |          |          |  |  |  |     |          |          |          |  |  |     |          |          |          |          |  |      |          |          |          |          |          |      |          |          |          |          |          |      |          |          |          |          |          |      |          |          |          |          |          |      |          |          |          |          |          |      |          |          |          |          |          |      |          |          |          |          |          |      |          |          |          |          |          |      |          |          |          |          |          |      |          |          |          |          |          |
|---------------------------------------------------------------------------------------------------------------|-----------------------------------------------------------------------------------------------------------------------------------------------------------------------------------------------------------------------------------------------------------------------------------------------------------------------------------------------------------------------------------------------------------------------------------------------------------------------------------------------------------------------------------------------------------------------------------------------------------------------------------------------------------------------------------------------------------------------------------------------------------------------------------------------------------------------------------------------------------------------------------------------------------------------------------------------------------------------------------------------------------------------------------------------------------------------------------------------------------------------------------------------------------------------------------------------------------------------------------------------------------------------------------------------------------------------------------------------------------------------------------------------------------------------------------------------------------------------------------------------------------------------------------------------------------------------------------------------------------------------------------------------------------------------------------------------------------------------------------------------------------------------------------------------------------------------------------------------------------------------------------------------------------------------------------------------------------------------------------------------------------------------------------------------------------------------------------------------------------------------------------------------------------------------------------------------------------------------------------------------------------------------------------------------------------------------------------------------------------------------------------------------------------------------------------------------------------------------------------------------------------------------------------------------------------------------------------------------------------------------------------------------------------------------------------------------------------------------------------------------------------------------------------------------------------------------------------------------------------------------------------------------------------------------------------------------------------------------------------------------------------------------------------------------------------------------------------------------------------------------------------------------------------------------------------------------------------------------------------------------------------------------------------------------------------------------------------------------------------------------------------------------------------------------------------------------------------------------------------------------------------------------------------------------------------------------------------------------------------------------------------------------------------------------------------------------------------------------------------------------------------------------------------------------------------------------------------------------------------------------------------------------------------------------------------------------------------------------------------------------------------------------------------------------------------------------------------------------------------------------------------------------------------------------------------------------------------------------------------------------------------------------------------------------------------------------------------------------------------------------------------------------------------------------------------------------------------------------------------------------------------------------------------------------------------------------------------------------------------------------------------------------------------------------------------------------------------------------------------------------------------------------------------------------------------------------------------------------------------------------------------------------------------------------------------------------------------------------------------------------------------------------------------------|----------|----------|----------|----------|----------|----------|------|----------|----|----|--|--|------|----------|----------|--|--|--|------|----------|----------|----------|--|--|------|----------|----------|----------|----------|--|-----|----------|----------|----------|----------|----------|-----|----------|----------|----------|----------|----------|-----|----------|----------|----------|----------|----------|-----|----------|----------|----------|----------|----------|-----|----------|----------|----------|----------|----------|------|----------|----------|----------|----------|----------|------|----------|----------|----------|----------|----------|------|----------|----------|----------|----------|----------|------|----------|----------|----------|----------|----------|------|----------|----------|----------|----------|----------|------|----------|----------|----------|----------|----------|------|----------|----------|----------|----------|----------|------|----------|----------|----------|----------|----------|------|----------|----------|----------|----------|----------|------|----------|----------|----------|----------|----------|------|----------|----------|----------|----------|----------|------|----------|----------|----------|----------|----------|------|----------|----------|----------|----------|----------|------|----------|----------|----------|----------|----------|------|----------|----------|----------|----------|----------|------|----------|----------|----------|----------|----------|------|----------|----------|----------|----------|----------|------|----------|----------|----------|----------|----------|------|----------|----------|----------|----------|----------|--|---|---|---|---|----|-----|----------|--|--|--|--|-----|----------|----------|--|--|--|-----|----------|----------|----------|--|--|-----|----------|----------|----------|----------|--|------|----------|----------|----------|----------|----------|------|----------|----------|----------|----------|----------|------|----------|----------|----------|----------|----------|------|----------|----------|----------|----------|----------|------|----------|----------|----------|----------|----------|------|----------|----------|----------|----------|----------|------|----------|----------|----------|----------|----------|------|----------|----------|----------|----------|----------|------|----------|----------|----------|----------|----------|------|----------|----------|----------|----------|----------|
|                                                                                                               | <table border="0"> <tr> <td>28 H</td> <td>6.882977</td> <td>5.905649</td> <td>2.416754</td> <td>3.700853</td> <td>1.086884</td> </tr> <tr> <td></td> <td>26</td> <td>27</td> <td>28</td> <td></td> <td></td> </tr> <tr> <td>26 C</td> <td>0.000000</td> <td></td> <td></td> <td></td> <td></td> </tr> <tr> <td>27 H</td> <td>1.086503</td> <td>0.000000</td> <td></td> <td></td> <td></td> </tr> <tr> <td>28 H</td> <td>2.123332</td> <td>2.513399</td> <td>0.000000</td> <td></td> <td></td> </tr> </table>                                                                                                                                                                                                                                                                                                                                                                                                                                                                                                                                                                                                                                                                                                                                                                                                                                                                                                                                                                                                                                                                                                                                                                                                                                                                                                                                                                                                                                                                                                                                                                                                                                                                                                                                                                                                                                                                                                                                                                                                                                                                                                                                                                                                                                                                                                                                                                                                                                                                                                                                                                                                                                                                                                                                                                                                                                                                                                                                                                                                                                                                                                                                                                                                                                                                                                                                                                                                                                                                                                                                                                                                                                                                                                                                                                                                                                                                                                                                                                                                                                                                                                                                                                                                                                                                                                                                                                                                                                                                                                                            | 28 H     | 6.882977 | 5.905649 | 2.416754 | 3.700853 | 1.086884 |      | 26       | 27 | 28 |  |  | 26 C | 0.000000 |          |  |  |  | 27 H | 1.086503 | 0.000000 |          |  |  | 28 H | 2.123332 | 2.513399 | 0.000000 |          |  |     |          |          |          |          |          |     |          |          |          |          |          |     |          |          |          |          |          |     |          |          |          |          |          |     |          |          |          |          |          |      |          |          |          |          |          |      |          |          |          |          |          |      |          |          |          |          |          |      |          |          |          |          |          |      |          |          |          |          |          |      |          |          |          |          |          |      |          |          |          |          |          |      |          |          |          |          |          |      |          |          |          |          |          |      |          |          |          |          |          |      |          |          |          |          |          |      |          |          |          |          |          |      |          |          |          |          |          |      |          |          |          |          |          |      |          |          |          |          |          |      |          |          |          |          |          |      |          |          |          |          |          |      |          |          |          |          |          |      |          |          |          |          |          |  |   |   |   |   |    |     |          |  |  |  |  |     |          |          |  |  |  |     |          |          |          |  |  |     |          |          |          |          |  |      |          |          |          |          |          |      |          |          |          |          |          |      |          |          |          |          |          |      |          |          |          |          |          |      |          |          |          |          |          |      |          |          |          |          |          |      |          |          |          |          |          |      |          |          |          |          |          |      |          |          |          |          |          |      |          |          |          |          |          |
| 28 H                                                                                                          | 6.882977                                                                                                                                                                                                                                                                                                                                                                                                                                                                                                                                                                                                                                                                                                                                                                                                                                                                                                                                                                                                                                                                                                                                                                                                                                                                                                                                                                                                                                                                                                                                                                                                                                                                                                                                                                                                                                                                                                                                                                                                                                                                                                                                                                                                                                                                                                                                                                                                                                                                                                                                                                                                                                                                                                                                                                                                                                                                                                                                                                                                                                                                                                                                                                                                                                                                                                                                                                                                                                                                                                                                                                                                                                                                                                                                                                                                                                                                                                                                                                                                                                                                                                                                                                                                                                                                                                                                                                                                                                                                                                                                                                                                                                                                                                                                                                                                                                                                                                                                                                                                                                | 5.905649 | 2.416754 | 3.700853 | 1.086884 |          |          |      |          |    |    |  |  |      |          |          |  |  |  |      |          |          |          |  |  |      |          |          |          |          |  |     |          |          |          |          |          |     |          |          |          |          |          |     |          |          |          |          |          |     |          |          |          |          |          |     |          |          |          |          |          |      |          |          |          |          |          |      |          |          |          |          |          |      |          |          |          |          |          |      |          |          |          |          |          |      |          |          |          |          |          |      |          |          |          |          |          |      |          |          |          |          |          |      |          |          |          |          |          |      |          |          |          |          |          |      |          |          |          |          |          |      |          |          |          |          |          |      |          |          |          |          |          |      |          |          |          |          |          |      |          |          |          |          |          |      |          |          |          |          |          |      |          |          |          |          |          |      |          |          |          |          |          |      |          |          |          |          |          |      |          |          |          |          |          |  |   |   |   |   |    |     |          |  |  |  |  |     |          |          |  |  |  |     |          |          |          |  |  |     |          |          |          |          |  |      |          |          |          |          |          |      |          |          |          |          |          |      |          |          |          |          |          |      |          |          |          |          |          |      |          |          |          |          |          |      |          |          |          |          |          |      |          |          |          |          |          |      |          |          |          |          |          |      |          |          |          |          |          |      |          |          |          |          |          |
|                                                                                                               | 26                                                                                                                                                                                                                                                                                                                                                                                                                                                                                                                                                                                                                                                                                                                                                                                                                                                                                                                                                                                                                                                                                                                                                                                                                                                                                                                                                                                                                                                                                                                                                                                                                                                                                                                                                                                                                                                                                                                                                                                                                                                                                                                                                                                                                                                                                                                                                                                                                                                                                                                                                                                                                                                                                                                                                                                                                                                                                                                                                                                                                                                                                                                                                                                                                                                                                                                                                                                                                                                                                                                                                                                                                                                                                                                                                                                                                                                                                                                                                                                                                                                                                                                                                                                                                                                                                                                                                                                                                                                                                                                                                                                                                                                                                                                                                                                                                                                                                                                                                                                                                                      | 27       | 28       |          |          |          |          |      |          |    |    |  |  |      |          |          |  |  |  |      |          |          |          |  |  |      |          |          |          |          |  |     |          |          |          |          |          |     |          |          |          |          |          |     |          |          |          |          |          |     |          |          |          |          |          |     |          |          |          |          |          |      |          |          |          |          |          |      |          |          |          |          |          |      |          |          |          |          |          |      |          |          |          |          |          |      |          |          |          |          |          |      |          |          |          |          |          |      |          |          |          |          |          |      |          |          |          |          |          |      |          |          |          |          |          |      |          |          |          |          |          |      |          |          |          |          |          |      |          |          |          |          |          |      |          |          |          |          |          |      |          |          |          |          |          |      |          |          |          |          |          |      |          |          |          |          |          |      |          |          |          |          |          |      |          |          |          |          |          |      |          |          |          |          |          |  |   |   |   |   |    |     |          |  |  |  |  |     |          |          |  |  |  |     |          |          |          |  |  |     |          |          |          |          |  |      |          |          |          |          |          |      |          |          |          |          |          |      |          |          |          |          |          |      |          |          |          |          |          |      |          |          |          |          |          |      |          |          |          |          |          |      |          |          |          |          |          |      |          |          |          |          |          |      |          |          |          |          |          |      |          |          |          |          |          |
| 26 C                                                                                                          | 0.000000                                                                                                                                                                                                                                                                                                                                                                                                                                                                                                                                                                                                                                                                                                                                                                                                                                                                                                                                                                                                                                                                                                                                                                                                                                                                                                                                                                                                                                                                                                                                                                                                                                                                                                                                                                                                                                                                                                                                                                                                                                                                                                                                                                                                                                                                                                                                                                                                                                                                                                                                                                                                                                                                                                                                                                                                                                                                                                                                                                                                                                                                                                                                                                                                                                                                                                                                                                                                                                                                                                                                                                                                                                                                                                                                                                                                                                                                                                                                                                                                                                                                                                                                                                                                                                                                                                                                                                                                                                                                                                                                                                                                                                                                                                                                                                                                                                                                                                                                                                                                                                |          |          |          |          |          |          |      |          |    |    |  |  |      |          |          |  |  |  |      |          |          |          |  |  |      |          |          |          |          |  |     |          |          |          |          |          |     |          |          |          |          |          |     |          |          |          |          |          |     |          |          |          |          |          |     |          |          |          |          |          |      |          |          |          |          |          |      |          |          |          |          |          |      |          |          |          |          |          |      |          |          |          |          |          |      |          |          |          |          |          |      |          |          |          |          |          |      |          |          |          |          |          |      |          |          |          |          |          |      |          |          |          |          |          |      |          |          |          |          |          |      |          |          |          |          |          |      |          |          |          |          |          |      |          |          |          |          |          |      |          |          |          |          |          |      |          |          |          |          |          |      |          |          |          |          |          |      |          |          |          |          |          |      |          |          |          |          |          |      |          |          |          |          |          |  |   |   |   |   |    |     |          |  |  |  |  |     |          |          |  |  |  |     |          |          |          |  |  |     |          |          |          |          |  |      |          |          |          |          |          |      |          |          |          |          |          |      |          |          |          |          |          |      |          |          |          |          |          |      |          |          |          |          |          |      |          |          |          |          |          |      |          |          |          |          |          |      |          |          |          |          |          |      |          |          |          |          |          |      |          |          |          |          |          |
| 27 H                                                                                                          | 1.086503                                                                                                                                                                                                                                                                                                                                                                                                                                                                                                                                                                                                                                                                                                                                                                                                                                                                                                                                                                                                                                                                                                                                                                                                                                                                                                                                                                                                                                                                                                                                                                                                                                                                                                                                                                                                                                                                                                                                                                                                                                                                                                                                                                                                                                                                                                                                                                                                                                                                                                                                                                                                                                                                                                                                                                                                                                                                                                                                                                                                                                                                                                                                                                                                                                                                                                                                                                                                                                                                                                                                                                                                                                                                                                                                                                                                                                                                                                                                                                                                                                                                                                                                                                                                                                                                                                                                                                                                                                                                                                                                                                                                                                                                                                                                                                                                                                                                                                                                                                                                                                | 0.000000 |          |          |          |          |          |      |          |    |    |  |  |      |          |          |  |  |  |      |          |          |          |  |  |      |          |          |          |          |  |     |          |          |          |          |          |     |          |          |          |          |          |     |          |          |          |          |          |     |          |          |          |          |          |     |          |          |          |          |          |      |          |          |          |          |          |      |          |          |          |          |          |      |          |          |          |          |          |      |          |          |          |          |          |      |          |          |          |          |          |      |          |          |          |          |          |      |          |          |          |          |          |      |          |          |          |          |          |      |          |          |          |          |          |      |          |          |          |          |          |      |          |          |          |          |          |      |          |          |          |          |          |      |          |          |          |          |          |      |          |          |          |          |          |      |          |          |          |          |          |      |          |          |          |          |          |      |          |          |          |          |          |      |          |          |          |          |          |      |          |          |          |          |          |  |   |   |   |   |    |     |          |  |  |  |  |     |          |          |  |  |  |     |          |          |          |  |  |     |          |          |          |          |  |      |          |          |          |          |          |      |          |          |          |          |          |      |          |          |          |          |          |      |          |          |          |          |          |      |          |          |          |          |          |      |          |          |          |          |          |      |          |          |          |          |          |      |          |          |          |          |          |      |          |          |          |          |          |      |          |          |          |          |          |
| 28 H                                                                                                          | 2.123332                                                                                                                                                                                                                                                                                                                                                                                                                                                                                                                                                                                                                                                                                                                                                                                                                                                                                                                                                                                                                                                                                                                                                                                                                                                                                                                                                                                                                                                                                                                                                                                                                                                                                                                                                                                                                                                                                                                                                                                                                                                                                                                                                                                                                                                                                                                                                                                                                                                                                                                                                                                                                                                                                                                                                                                                                                                                                                                                                                                                                                                                                                                                                                                                                                                                                                                                                                                                                                                                                                                                                                                                                                                                                                                                                                                                                                                                                                                                                                                                                                                                                                                                                                                                                                                                                                                                                                                                                                                                                                                                                                                                                                                                                                                                                                                                                                                                                                                                                                                                                                | 2.513399 | 0.000000 |          |          |          |          |      |          |    |    |  |  |      |          |          |  |  |  |      |          |          |          |  |  |      |          |          |          |          |  |     |          |          |          |          |          |     |          |          |          |          |          |     |          |          |          |          |          |     |          |          |          |          |          |     |          |          |          |          |          |      |          |          |          |          |          |      |          |          |          |          |          |      |          |          |          |          |          |      |          |          |          |          |          |      |          |          |          |          |          |      |          |          |          |          |          |      |          |          |          |          |          |      |          |          |          |          |          |      |          |          |          |          |          |      |          |          |          |          |          |      |          |          |          |          |          |      |          |          |          |          |          |      |          |          |          |          |          |      |          |          |          |          |          |      |          |          |          |          |          |      |          |          |          |          |          |      |          |          |          |          |          |      |          |          |          |          |          |      |          |          |          |          |          |  |   |   |   |   |    |     |          |  |  |  |  |     |          |          |  |  |  |     |          |          |          |  |  |     |          |          |          |          |  |      |          |          |          |          |          |      |          |          |          |          |          |      |          |          |          |          |          |      |          |          |          |          |          |      |          |          |          |          |          |      |          |          |          |          |          |      |          |          |          |          |          |      |          |          |          |          |          |      |          |          |          |          |          |      |          |          |          |          |          |
| 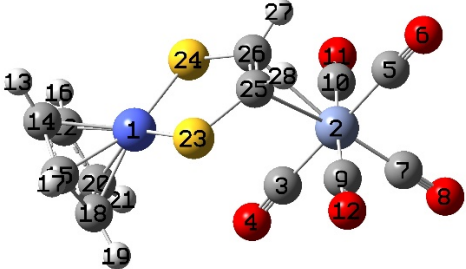 <p>2. -4059.643976 +3.2</p> | <table border="0"> <tr> <td></td> <td>1</td> <td>2</td> <td>3</td> <td>4</td> <td>5</td> </tr> <tr> <td>1 Co</td> <td>0.000000</td> <td></td> <td></td> <td></td> <td></td> </tr> <tr> <td>2 Cr</td> <td>4.395459</td> <td>0.000000</td> <td></td> <td></td> <td></td> </tr> <tr> <td>3 C</td> <td>3.558280</td> <td>1.885863</td> <td>0.000000</td> <td></td> <td></td> </tr> <tr> <td>4 O</td> <td>3.538034</td> <td>3.028919</td> <td>1.144090</td> <td>0.000000</td> <td></td> </tr> <tr> <td>5 C</td> <td>5.741112</td> <td>1.889197</td> <td>3.774988</td> <td>4.918079</td> <td>0.000000</td> </tr> <tr> <td>6 O</td> <td>6.693439</td> <td>3.031727</td> <td>4.917567</td> <td>6.060495</td> <td>1.142622</td> </tr> <tr> <td>7 C</td> <td>5.958998</td> <td>1.836722</td> <td>2.645629</td> <td>3.526027</td> <td>2.637937</td> </tr> <tr> <td>8 O</td> <td>7.002589</td> <td>2.983540</td> <td>3.545157</td> <td>4.229073</td> <td>3.535419</td> </tr> <tr> <td>9 C</td> <td>4.835783</td> <td>1.890396</td> <td>2.656200</td> <td>3.551803</td> <td>2.686486</td> </tr> <tr> <td>10 C</td> <td>4.831702</td> <td>1.890505</td> <td>2.657230</td> <td>3.553708</td> <td>2.687156</td> </tr> <tr> <td>11 O</td> <td>5.434502</td> <td>3.031686</td> <td>3.550485</td> <td>4.256702</td> <td>3.594050</td> </tr> <tr> <td>12 O</td> <td>5.440140</td> <td>3.031605</td> <td>3.549112</td> <td>4.253958</td> <td>3.593431</td> </tr> <tr> <td>13 H</td> <td>2.752387</td> <td>7.001414</td> <td>6.299795</td> <td>6.184648</td> <td>8.075646</td> </tr> <tr> <td>14 C</td> <td>2.008260</td> <td>6.395855</td> <td>5.477440</td> <td>5.243154</td> <td>7.663139</td> </tr> <tr> <td>15 C</td> <td>2.023601</td> <td>6.156259</td> <td>5.110304</td> <td>4.795008</td> <td>7.524875</td> </tr> <tr> <td>16 H</td> <td>2.779992</td> <td>6.370973</td> <td>5.368992</td> <td>5.069830</td> <td>7.701047</td> </tr> <tr> <td>17 H</td> <td>2.775902</td> <td>6.586463</td> <td>5.689370</td> <td>5.455760</td> <td>7.830095</td> </tr> <tr> <td>18 C</td> <td>2.015348</td> <td>5.584137</td> <td>4.207253</td> <td>3.658907</td> <td>7.188106</td> </tr> <tr> <td>19 H</td> <td>2.759716</td> <td>5.524962</td> <td>4.038923</td> <td>3.385616</td> <td>7.195633</td> </tr> <tr> <td>20 C</td> <td>2.009799</td> <td>5.494443</td> <td>4.060605</td> <td>3.467170</td> <td>7.134858</td> </tr> <tr> <td>21 H</td> <td>2.748646</td> <td>5.346899</td> <td>3.739722</td> <td>2.976139</td> <td>7.089135</td> </tr> <tr> <td>22 C</td> <td>2.028042</td> <td>6.037423</td> <td>4.925949</td> <td>4.567820</td> <td>7.456238</td> </tr> <tr> <td>23 S</td> <td>2.118586</td> <td>3.610239</td> <td>3.399554</td> <td>3.806752</td> <td>4.637073</td> </tr> <tr> <td>24 S</td> <td>2.119151</td> <td>3.610669</td> <td>3.402403</td> <td>3.811091</td> <td>4.636387</td> </tr> <tr> <td>25 C</td> <td>3.054627</td> <td>2.459832</td> <td>3.133060</td> <td>3.981272</td> <td>3.049459</td> </tr> <tr> <td>26 C</td> <td>3.054493</td> <td>2.460479</td> <td>3.134690</td> <td>3.983311</td> <td>3.049325</td> </tr> <tr> <td>27 H</td> <td>4.057372</td> <td>2.822796</td> <td>3.902514</td> <td>4.835359</td> <td>2.778534</td> </tr> <tr> <td>28 H</td> <td>4.057247</td> <td>2.822435</td> <td>3.900493</td> <td>4.832543</td> <td>2.779644</td> </tr> <tr> <td></td> <td>6</td> <td>7</td> <td>8</td> <td>9</td> <td>10</td> </tr> <tr> <td>6 O</td> <td>0.000000</td> <td></td> <td></td> <td></td> <td></td> </tr> <tr> <td>7 C</td> <td>3.538781</td> <td>0.000000</td> <td></td> <td></td> <td></td> </tr> <tr> <td>8 O</td> <td>4.246021</td> <td>1.146818</td> <td>0.000000</td> <td></td> <td></td> </tr> <tr> <td>9 C</td> <td>3.588900</td> <td>2.577661</td> <td>3.461780</td> <td>0.000000</td> <td></td> </tr> <tr> <td>10 C</td> <td>3.590040</td> <td>2.577179</td> <td>3.460954</td> <td>3.777060</td> <td>0.000000</td> </tr> <tr> <td>11 O</td> <td>4.316232</td> <td>3.448662</td> <td>4.123207</td> <td>4.915461</td> <td>1.141866</td> </tr> <tr> <td>12 O</td> <td>4.314946</td> <td>3.449299</td> <td>4.124385</td> <td>1.141894</td> <td>4.915489</td> </tr> <tr> <td>13 H</td> <td>8.871384</td> <td>8.656408</td> <td>9.722678</td> <td>7.396191</td> <td>7.228309</td> </tr> <tr> <td>14 C</td> <td>8.552939</td> <td>7.950750</td> <td>8.975488</td> <td>6.771064</td> <td>6.672318</td> </tr> <tr> <td>15 C</td> <td>8.460367</td> <td>7.610930</td> <td>8.593448</td> <td>6.161897</td> <td>6.794020</td> </tr> <tr> <td>16 H</td> <td>8.617018</td> <td>7.752844</td> <td>8.701055</td> <td>7.299170</td> <td>6.015242</td> </tr> <tr> <td>17 H</td> <td>8.706244</td> <td>8.061552</td> <td>9.049703</td> <td>6.314473</td> <td>7.441668</td> </tr> <tr> <td>18 C</td> <td>8.224372</td> <td>6.810656</td> <td>7.700210</td> <td>5.652651</td> <td>6.186212</td> </tr> <tr> <td>19 H</td> <td>8.257309</td> <td>6.553555</td> <td>7.356793</td> <td>5.324542</td> <td>6.347412</td> </tr> </table> |          | 1        | 2        | 3        | 4        | 5        | 1 Co | 0.000000 |    |    |  |  | 2 Cr | 4.395459 | 0.000000 |  |  |  | 3 C  | 3.558280 | 1.885863 | 0.000000 |  |  | 4 O  | 3.538034 | 3.028919 | 1.144090 | 0.000000 |  | 5 C | 5.741112 | 1.889197 | 3.774988 | 4.918079 | 0.000000 | 6 O | 6.693439 | 3.031727 | 4.917567 | 6.060495 | 1.142622 | 7 C | 5.958998 | 1.836722 | 2.645629 | 3.526027 | 2.637937 | 8 O | 7.002589 | 2.983540 | 3.545157 | 4.229073 | 3.535419 | 9 C | 4.835783 | 1.890396 | 2.656200 | 3.551803 | 2.686486 | 10 C | 4.831702 | 1.890505 | 2.657230 | 3.553708 | 2.687156 | 11 O | 5.434502 | 3.031686 | 3.550485 | 4.256702 | 3.594050 | 12 O | 5.440140 | 3.031605 | 3.549112 | 4.253958 | 3.593431 | 13 H | 2.752387 | 7.001414 | 6.299795 | 6.184648 | 8.075646 | 14 C | 2.008260 | 6.395855 | 5.477440 | 5.243154 | 7.663139 | 15 C | 2.023601 | 6.156259 | 5.110304 | 4.795008 | 7.524875 | 16 H | 2.779992 | 6.370973 | 5.368992 | 5.069830 | 7.701047 | 17 H | 2.775902 | 6.586463 | 5.689370 | 5.455760 | 7.830095 | 18 C | 2.015348 | 5.584137 | 4.207253 | 3.658907 | 7.188106 | 19 H | 2.759716 | 5.524962 | 4.038923 | 3.385616 | 7.195633 | 20 C | 2.009799 | 5.494443 | 4.060605 | 3.467170 | 7.134858 | 21 H | 2.748646 | 5.346899 | 3.739722 | 2.976139 | 7.089135 | 22 C | 2.028042 | 6.037423 | 4.925949 | 4.567820 | 7.456238 | 23 S | 2.118586 | 3.610239 | 3.399554 | 3.806752 | 4.637073 | 24 S | 2.119151 | 3.610669 | 3.402403 | 3.811091 | 4.636387 | 25 C | 3.054627 | 2.459832 | 3.133060 | 3.981272 | 3.049459 | 26 C | 3.054493 | 2.460479 | 3.134690 | 3.983311 | 3.049325 | 27 H | 4.057372 | 2.822796 | 3.902514 | 4.835359 | 2.778534 | 28 H | 4.057247 | 2.822435 | 3.900493 | 4.832543 | 2.779644 |  | 6 | 7 | 8 | 9 | 10 | 6 O | 0.000000 |  |  |  |  | 7 C | 3.538781 | 0.000000 |  |  |  | 8 O | 4.246021 | 1.146818 | 0.000000 |  |  | 9 C | 3.588900 | 2.577661 | 3.461780 | 0.000000 |  | 10 C | 3.590040 | 2.577179 | 3.460954 | 3.777060 | 0.000000 | 11 O | 4.316232 | 3.448662 | 4.123207 | 4.915461 | 1.141866 | 12 O | 4.314946 | 3.449299 | 4.124385 | 1.141894 | 4.915489 | 13 H | 8.871384 | 8.656408 | 9.722678 | 7.396191 | 7.228309 | 14 C | 8.552939 | 7.950750 | 8.975488 | 6.771064 | 6.672318 | 15 C | 8.460367 | 7.610930 | 8.593448 | 6.161897 | 6.794020 | 16 H | 8.617018 | 7.752844 | 8.701055 | 7.299170 | 6.015242 | 17 H | 8.706244 | 8.061552 | 9.049703 | 6.314473 | 7.441668 | 18 C | 8.224372 | 6.810656 | 7.700210 | 5.652651 | 6.186212 | 19 H | 8.257309 | 6.553555 | 7.356793 | 5.324542 | 6.347412 |
|                                                                                                               | 1                                                                                                                                                                                                                                                                                                                                                                                                                                                                                                                                                                                                                                                                                                                                                                                                                                                                                                                                                                                                                                                                                                                                                                                                                                                                                                                                                                                                                                                                                                                                                                                                                                                                                                                                                                                                                                                                                                                                                                                                                                                                                                                                                                                                                                                                                                                                                                                                                                                                                                                                                                                                                                                                                                                                                                                                                                                                                                                                                                                                                                                                                                                                                                                                                                                                                                                                                                                                                                                                                                                                                                                                                                                                                                                                                                                                                                                                                                                                                                                                                                                                                                                                                                                                                                                                                                                                                                                                                                                                                                                                                                                                                                                                                                                                                                                                                                                                                                                                                                                                                                       | 2        | 3        | 4        | 5        |          |          |      |          |    |    |  |  |      |          |          |  |  |  |      |          |          |          |  |  |      |          |          |          |          |  |     |          |          |          |          |          |     |          |          |          |          |          |     |          |          |          |          |          |     |          |          |          |          |          |     |          |          |          |          |          |      |          |          |          |          |          |      |          |          |          |          |          |      |          |          |          |          |          |      |          |          |          |          |          |      |          |          |          |          |          |      |          |          |          |          |          |      |          |          |          |          |          |      |          |          |          |          |          |      |          |          |          |          |          |      |          |          |          |          |          |      |          |          |          |          |          |      |          |          |          |          |          |      |          |          |          |          |          |      |          |          |          |          |          |      |          |          |          |          |          |      |          |          |          |          |          |      |          |          |          |          |          |      |          |          |          |          |          |      |          |          |          |          |          |  |   |   |   |   |    |     |          |  |  |  |  |     |          |          |  |  |  |     |          |          |          |  |  |     |          |          |          |          |  |      |          |          |          |          |          |      |          |          |          |          |          |      |          |          |          |          |          |      |          |          |          |          |          |      |          |          |          |          |          |      |          |          |          |          |          |      |          |          |          |          |          |      |          |          |          |          |          |      |          |          |          |          |          |      |          |          |          |          |          |
| 1 Co                                                                                                          | 0.000000                                                                                                                                                                                                                                                                                                                                                                                                                                                                                                                                                                                                                                                                                                                                                                                                                                                                                                                                                                                                                                                                                                                                                                                                                                                                                                                                                                                                                                                                                                                                                                                                                                                                                                                                                                                                                                                                                                                                                                                                                                                                                                                                                                                                                                                                                                                                                                                                                                                                                                                                                                                                                                                                                                                                                                                                                                                                                                                                                                                                                                                                                                                                                                                                                                                                                                                                                                                                                                                                                                                                                                                                                                                                                                                                                                                                                                                                                                                                                                                                                                                                                                                                                                                                                                                                                                                                                                                                                                                                                                                                                                                                                                                                                                                                                                                                                                                                                                                                                                                                                                |          |          |          |          |          |          |      |          |    |    |  |  |      |          |          |  |  |  |      |          |          |          |  |  |      |          |          |          |          |  |     |          |          |          |          |          |     |          |          |          |          |          |     |          |          |          |          |          |     |          |          |          |          |          |     |          |          |          |          |          |      |          |          |          |          |          |      |          |          |          |          |          |      |          |          |          |          |          |      |          |          |          |          |          |      |          |          |          |          |          |      |          |          |          |          |          |      |          |          |          |          |          |      |          |          |          |          |          |      |          |          |          |          |          |      |          |          |          |          |          |      |          |          |          |          |          |      |          |          |          |          |          |      |          |          |          |          |          |      |          |          |          |          |          |      |          |          |          |          |          |      |          |          |          |          |          |      |          |          |          |          |          |      |          |          |          |          |          |      |          |          |          |          |          |  |   |   |   |   |    |     |          |  |  |  |  |     |          |          |  |  |  |     |          |          |          |  |  |     |          |          |          |          |  |      |          |          |          |          |          |      |          |          |          |          |          |      |          |          |          |          |          |      |          |          |          |          |          |      |          |          |          |          |          |      |          |          |          |          |          |      |          |          |          |          |          |      |          |          |          |          |          |      |          |          |          |          |          |      |          |          |          |          |          |
| 2 Cr                                                                                                          | 4.395459                                                                                                                                                                                                                                                                                                                                                                                                                                                                                                                                                                                                                                                                                                                                                                                                                                                                                                                                                                                                                                                                                                                                                                                                                                                                                                                                                                                                                                                                                                                                                                                                                                                                                                                                                                                                                                                                                                                                                                                                                                                                                                                                                                                                                                                                                                                                                                                                                                                                                                                                                                                                                                                                                                                                                                                                                                                                                                                                                                                                                                                                                                                                                                                                                                                                                                                                                                                                                                                                                                                                                                                                                                                                                                                                                                                                                                                                                                                                                                                                                                                                                                                                                                                                                                                                                                                                                                                                                                                                                                                                                                                                                                                                                                                                                                                                                                                                                                                                                                                                                                | 0.000000 |          |          |          |          |          |      |          |    |    |  |  |      |          |          |  |  |  |      |          |          |          |  |  |      |          |          |          |          |  |     |          |          |          |          |          |     |          |          |          |          |          |     |          |          |          |          |          |     |          |          |          |          |          |     |          |          |          |          |          |      |          |          |          |          |          |      |          |          |          |          |          |      |          |          |          |          |          |      |          |          |          |          |          |      |          |          |          |          |          |      |          |          |          |          |          |      |          |          |          |          |          |      |          |          |          |          |          |      |          |          |          |          |          |      |          |          |          |          |          |      |          |          |          |          |          |      |          |          |          |          |          |      |          |          |          |          |          |      |          |          |          |          |          |      |          |          |          |          |          |      |          |          |          |          |          |      |          |          |          |          |          |      |          |          |          |          |          |      |          |          |          |          |          |  |   |   |   |   |    |     |          |  |  |  |  |     |          |          |  |  |  |     |          |          |          |  |  |     |          |          |          |          |  |      |          |          |          |          |          |      |          |          |          |          |          |      |          |          |          |          |          |      |          |          |          |          |          |      |          |          |          |          |          |      |          |          |          |          |          |      |          |          |          |          |          |      |          |          |          |          |          |      |          |          |          |          |          |      |          |          |          |          |          |
| 3 C                                                                                                           | 3.558280                                                                                                                                                                                                                                                                                                                                                                                                                                                                                                                                                                                                                                                                                                                                                                                                                                                                                                                                                                                                                                                                                                                                                                                                                                                                                                                                                                                                                                                                                                                                                                                                                                                                                                                                                                                                                                                                                                                                                                                                                                                                                                                                                                                                                                                                                                                                                                                                                                                                                                                                                                                                                                                                                                                                                                                                                                                                                                                                                                                                                                                                                                                                                                                                                                                                                                                                                                                                                                                                                                                                                                                                                                                                                                                                                                                                                                                                                                                                                                                                                                                                                                                                                                                                                                                                                                                                                                                                                                                                                                                                                                                                                                                                                                                                                                                                                                                                                                                                                                                                                                | 1.885863 | 0.000000 |          |          |          |          |      |          |    |    |  |  |      |          |          |  |  |  |      |          |          |          |  |  |      |          |          |          |          |  |     |          |          |          |          |          |     |          |          |          |          |          |     |          |          |          |          |          |     |          |          |          |          |          |     |          |          |          |          |          |      |          |          |          |          |          |      |          |          |          |          |          |      |          |          |          |          |          |      |          |          |          |          |          |      |          |          |          |          |          |      |          |          |          |          |          |      |          |          |          |          |          |      |          |          |          |          |          |      |          |          |          |          |          |      |          |          |          |          |          |      |          |          |          |          |          |      |          |          |          |          |          |      |          |          |          |          |          |      |          |          |          |          |          |      |          |          |          |          |          |      |          |          |          |          |          |      |          |          |          |          |          |      |          |          |          |          |          |      |          |          |          |          |          |  |   |   |   |   |    |     |          |  |  |  |  |     |          |          |  |  |  |     |          |          |          |  |  |     |          |          |          |          |  |      |          |          |          |          |          |      |          |          |          |          |          |      |          |          |          |          |          |      |          |          |          |          |          |      |          |          |          |          |          |      |          |          |          |          |          |      |          |          |          |          |          |      |          |          |          |          |          |      |          |          |          |          |          |      |          |          |          |          |          |
| 4 O                                                                                                           | 3.538034                                                                                                                                                                                                                                                                                                                                                                                                                                                                                                                                                                                                                                                                                                                                                                                                                                                                                                                                                                                                                                                                                                                                                                                                                                                                                                                                                                                                                                                                                                                                                                                                                                                                                                                                                                                                                                                                                                                                                                                                                                                                                                                                                                                                                                                                                                                                                                                                                                                                                                                                                                                                                                                                                                                                                                                                                                                                                                                                                                                                                                                                                                                                                                                                                                                                                                                                                                                                                                                                                                                                                                                                                                                                                                                                                                                                                                                                                                                                                                                                                                                                                                                                                                                                                                                                                                                                                                                                                                                                                                                                                                                                                                                                                                                                                                                                                                                                                                                                                                                                                                | 3.028919 | 1.144090 | 0.000000 |          |          |          |      |          |    |    |  |  |      |          |          |  |  |  |      |          |          |          |  |  |      |          |          |          |          |  |     |          |          |          |          |          |     |          |          |          |          |          |     |          |          |          |          |          |     |          |          |          |          |          |     |          |          |          |          |          |      |          |          |          |          |          |      |          |          |          |          |          |      |          |          |          |          |          |      |          |          |          |          |          |      |          |          |          |          |          |      |          |          |          |          |          |      |          |          |          |          |          |      |          |          |          |          |          |      |          |          |          |          |          |      |          |          |          |          |          |      |          |          |          |          |          |      |          |          |          |          |          |      |          |          |          |          |          |      |          |          |          |          |          |      |          |          |          |          |          |      |          |          |          |          |          |      |          |          |          |          |          |      |          |          |          |          |          |      |          |          |          |          |          |  |   |   |   |   |    |     |          |  |  |  |  |     |          |          |  |  |  |     |          |          |          |  |  |     |          |          |          |          |  |      |          |          |          |          |          |      |          |          |          |          |          |      |          |          |          |          |          |      |          |          |          |          |          |      |          |          |          |          |          |      |          |          |          |          |          |      |          |          |          |          |          |      |          |          |          |          |          |      |          |          |          |          |          |      |          |          |          |          |          |
| 5 C                                                                                                           | 5.741112                                                                                                                                                                                                                                                                                                                                                                                                                                                                                                                                                                                                                                                                                                                                                                                                                                                                                                                                                                                                                                                                                                                                                                                                                                                                                                                                                                                                                                                                                                                                                                                                                                                                                                                                                                                                                                                                                                                                                                                                                                                                                                                                                                                                                                                                                                                                                                                                                                                                                                                                                                                                                                                                                                                                                                                                                                                                                                                                                                                                                                                                                                                                                                                                                                                                                                                                                                                                                                                                                                                                                                                                                                                                                                                                                                                                                                                                                                                                                                                                                                                                                                                                                                                                                                                                                                                                                                                                                                                                                                                                                                                                                                                                                                                                                                                                                                                                                                                                                                                                                                | 1.889197 | 3.774988 | 4.918079 | 0.000000 |          |          |      |          |    |    |  |  |      |          |          |  |  |  |      |          |          |          |  |  |      |          |          |          |          |  |     |          |          |          |          |          |     |          |          |          |          |          |     |          |          |          |          |          |     |          |          |          |          |          |     |          |          |          |          |          |      |          |          |          |          |          |      |          |          |          |          |          |      |          |          |          |          |          |      |          |          |          |          |          |      |          |          |          |          |          |      |          |          |          |          |          |      |          |          |          |          |          |      |          |          |          |          |          |      |          |          |          |          |          |      |          |          |          |          |          |      |          |          |          |          |          |      |          |          |          |          |          |      |          |          |          |          |          |      |          |          |          |          |          |      |          |          |          |          |          |      |          |          |          |          |          |      |          |          |          |          |          |      |          |          |          |          |          |      |          |          |          |          |          |  |   |   |   |   |    |     |          |  |  |  |  |     |          |          |  |  |  |     |          |          |          |  |  |     |          |          |          |          |  |      |          |          |          |          |          |      |          |          |          |          |          |      |          |          |          |          |          |      |          |          |          |          |          |      |          |          |          |          |          |      |          |          |          |          |          |      |          |          |          |          |          |      |          |          |          |          |          |      |          |          |          |          |          |      |          |          |          |          |          |
| 6 O                                                                                                           | 6.693439                                                                                                                                                                                                                                                                                                                                                                                                                                                                                                                                                                                                                                                                                                                                                                                                                                                                                                                                                                                                                                                                                                                                                                                                                                                                                                                                                                                                                                                                                                                                                                                                                                                                                                                                                                                                                                                                                                                                                                                                                                                                                                                                                                                                                                                                                                                                                                                                                                                                                                                                                                                                                                                                                                                                                                                                                                                                                                                                                                                                                                                                                                                                                                                                                                                                                                                                                                                                                                                                                                                                                                                                                                                                                                                                                                                                                                                                                                                                                                                                                                                                                                                                                                                                                                                                                                                                                                                                                                                                                                                                                                                                                                                                                                                                                                                                                                                                                                                                                                                                                                | 3.031727 | 4.917567 | 6.060495 | 1.142622 |          |          |      |          |    |    |  |  |      |          |          |  |  |  |      |          |          |          |  |  |      |          |          |          |          |  |     |          |          |          |          |          |     |          |          |          |          |          |     |          |          |          |          |          |     |          |          |          |          |          |     |          |          |          |          |          |      |          |          |          |          |          |      |          |          |          |          |          |      |          |          |          |          |          |      |          |          |          |          |          |      |          |          |          |          |          |      |          |          |          |          |          |      |          |          |          |          |          |      |          |          |          |          |          |      |          |          |          |          |          |      |          |          |          |          |          |      |          |          |          |          |          |      |          |          |          |          |          |      |          |          |          |          |          |      |          |          |          |          |          |      |          |          |          |          |          |      |          |          |          |          |          |      |          |          |          |          |          |      |          |          |          |          |          |      |          |          |          |          |          |  |   |   |   |   |    |     |          |  |  |  |  |     |          |          |  |  |  |     |          |          |          |  |  |     |          |          |          |          |  |      |          |          |          |          |          |      |          |          |          |          |          |      |          |          |          |          |          |      |          |          |          |          |          |      |          |          |          |          |          |      |          |          |          |          |          |      |          |          |          |          |          |      |          |          |          |          |          |      |          |          |          |          |          |      |          |          |          |          |          |
| 7 C                                                                                                           | 5.958998                                                                                                                                                                                                                                                                                                                                                                                                                                                                                                                                                                                                                                                                                                                                                                                                                                                                                                                                                                                                                                                                                                                                                                                                                                                                                                                                                                                                                                                                                                                                                                                                                                                                                                                                                                                                                                                                                                                                                                                                                                                                                                                                                                                                                                                                                                                                                                                                                                                                                                                                                                                                                                                                                                                                                                                                                                                                                                                                                                                                                                                                                                                                                                                                                                                                                                                                                                                                                                                                                                                                                                                                                                                                                                                                                                                                                                                                                                                                                                                                                                                                                                                                                                                                                                                                                                                                                                                                                                                                                                                                                                                                                                                                                                                                                                                                                                                                                                                                                                                                                                | 1.836722 | 2.645629 | 3.526027 | 2.637937 |          |          |      |          |    |    |  |  |      |          |          |  |  |  |      |          |          |          |  |  |      |          |          |          |          |  |     |          |          |          |          |          |     |          |          |          |          |          |     |          |          |          |          |          |     |          |          |          |          |          |     |          |          |          |          |          |      |          |          |          |          |          |      |          |          |          |          |          |      |          |          |          |          |          |      |          |          |          |          |          |      |          |          |          |          |          |      |          |          |          |          |          |      |          |          |          |          |          |      |          |          |          |          |          |      |          |          |          |          |          |      |          |          |          |          |          |      |          |          |          |          |          |      |          |          |          |          |          |      |          |          |          |          |          |      |          |          |          |          |          |      |          |          |          |          |          |      |          |          |          |          |          |      |          |          |          |          |          |      |          |          |          |          |          |      |          |          |          |          |          |  |   |   |   |   |    |     |          |  |  |  |  |     |          |          |  |  |  |     |          |          |          |  |  |     |          |          |          |          |  |      |          |          |          |          |          |      |          |          |          |          |          |      |          |          |          |          |          |      |          |          |          |          |          |      |          |          |          |          |          |      |          |          |          |          |          |      |          |          |          |          |          |      |          |          |          |          |          |      |          |          |          |          |          |      |          |          |          |          |          |
| 8 O                                                                                                           | 7.002589                                                                                                                                                                                                                                                                                                                                                                                                                                                                                                                                                                                                                                                                                                                                                                                                                                                                                                                                                                                                                                                                                                                                                                                                                                                                                                                                                                                                                                                                                                                                                                                                                                                                                                                                                                                                                                                                                                                                                                                                                                                                                                                                                                                                                                                                                                                                                                                                                                                                                                                                                                                                                                                                                                                                                                                                                                                                                                                                                                                                                                                                                                                                                                                                                                                                                                                                                                                                                                                                                                                                                                                                                                                                                                                                                                                                                                                                                                                                                                                                                                                                                                                                                                                                                                                                                                                                                                                                                                                                                                                                                                                                                                                                                                                                                                                                                                                                                                                                                                                                                                | 2.983540 | 3.545157 | 4.229073 | 3.535419 |          |          |      |          |    |    |  |  |      |          |          |  |  |  |      |          |          |          |  |  |      |          |          |          |          |  |     |          |          |          |          |          |     |          |          |          |          |          |     |          |          |          |          |          |     |          |          |          |          |          |     |          |          |          |          |          |      |          |          |          |          |          |      |          |          |          |          |          |      |          |          |          |          |          |      |          |          |          |          |          |      |          |          |          |          |          |      |          |          |          |          |          |      |          |          |          |          |          |      |          |          |          |          |          |      |          |          |          |          |          |      |          |          |          |          |          |      |          |          |          |          |          |      |          |          |          |          |          |      |          |          |          |          |          |      |          |          |          |          |          |      |          |          |          |          |          |      |          |          |          |          |          |      |          |          |          |          |          |      |          |          |          |          |          |      |          |          |          |          |          |  |   |   |   |   |    |     |          |  |  |  |  |     |          |          |  |  |  |     |          |          |          |  |  |     |          |          |          |          |  |      |          |          |          |          |          |      |          |          |          |          |          |      |          |          |          |          |          |      |          |          |          |          |          |      |          |          |          |          |          |      |          |          |          |          |          |      |          |          |          |          |          |      |          |          |          |          |          |      |          |          |          |          |          |      |          |          |          |          |          |
| 9 C                                                                                                           | 4.835783                                                                                                                                                                                                                                                                                                                                                                                                                                                                                                                                                                                                                                                                                                                                                                                                                                                                                                                                                                                                                                                                                                                                                                                                                                                                                                                                                                                                                                                                                                                                                                                                                                                                                                                                                                                                                                                                                                                                                                                                                                                                                                                                                                                                                                                                                                                                                                                                                                                                                                                                                                                                                                                                                                                                                                                                                                                                                                                                                                                                                                                                                                                                                                                                                                                                                                                                                                                                                                                                                                                                                                                                                                                                                                                                                                                                                                                                                                                                                                                                                                                                                                                                                                                                                                                                                                                                                                                                                                                                                                                                                                                                                                                                                                                                                                                                                                                                                                                                                                                                                                | 1.890396 | 2.656200 | 3.551803 | 2.686486 |          |          |      |          |    |    |  |  |      |          |          |  |  |  |      |          |          |          |  |  |      |          |          |          |          |  |     |          |          |          |          |          |     |          |          |          |          |          |     |          |          |          |          |          |     |          |          |          |          |          |     |          |          |          |          |          |      |          |          |          |          |          |      |          |          |          |          |          |      |          |          |          |          |          |      |          |          |          |          |          |      |          |          |          |          |          |      |          |          |          |          |          |      |          |          |          |          |          |      |          |          |          |          |          |      |          |          |          |          |          |      |          |          |          |          |          |      |          |          |          |          |          |      |          |          |          |          |          |      |          |          |          |          |          |      |          |          |          |          |          |      |          |          |          |          |          |      |          |          |          |          |          |      |          |          |          |          |          |      |          |          |          |          |          |      |          |          |          |          |          |  |   |   |   |   |    |     |          |  |  |  |  |     |          |          |  |  |  |     |          |          |          |  |  |     |          |          |          |          |  |      |          |          |          |          |          |      |          |          |          |          |          |      |          |          |          |          |          |      |          |          |          |          |          |      |          |          |          |          |          |      |          |          |          |          |          |      |          |          |          |          |          |      |          |          |          |          |          |      |          |          |          |          |          |      |          |          |          |          |          |
| 10 C                                                                                                          | 4.831702                                                                                                                                                                                                                                                                                                                                                                                                                                                                                                                                                                                                                                                                                                                                                                                                                                                                                                                                                                                                                                                                                                                                                                                                                                                                                                                                                                                                                                                                                                                                                                                                                                                                                                                                                                                                                                                                                                                                                                                                                                                                                                                                                                                                                                                                                                                                                                                                                                                                                                                                                                                                                                                                                                                                                                                                                                                                                                                                                                                                                                                                                                                                                                                                                                                                                                                                                                                                                                                                                                                                                                                                                                                                                                                                                                                                                                                                                                                                                                                                                                                                                                                                                                                                                                                                                                                                                                                                                                                                                                                                                                                                                                                                                                                                                                                                                                                                                                                                                                                                                                | 1.890505 | 2.657230 | 3.553708 | 2.687156 |          |          |      |          |    |    |  |  |      |          |          |  |  |  |      |          |          |          |  |  |      |          |          |          |          |  |     |          |          |          |          |          |     |          |          |          |          |          |     |          |          |          |          |          |     |          |          |          |          |          |     |          |          |          |          |          |      |          |          |          |          |          |      |          |          |          |          |          |      |          |          |          |          |          |      |          |          |          |          |          |      |          |          |          |          |          |      |          |          |          |          |          |      |          |          |          |          |          |      |          |          |          |          |          |      |          |          |          |          |          |      |          |          |          |          |          |      |          |          |          |          |          |      |          |          |          |          |          |      |          |          |          |          |          |      |          |          |          |          |          |      |          |          |          |          |          |      |          |          |          |          |          |      |          |          |          |          |          |      |          |          |          |          |          |      |          |          |          |          |          |  |   |   |   |   |    |     |          |  |  |  |  |     |          |          |  |  |  |     |          |          |          |  |  |     |          |          |          |          |  |      |          |          |          |          |          |      |          |          |          |          |          |      |          |          |          |          |          |      |          |          |          |          |          |      |          |          |          |          |          |      |          |          |          |          |          |      |          |          |          |          |          |      |          |          |          |          |          |      |          |          |          |          |          |      |          |          |          |          |          |
| 11 O                                                                                                          | 5.434502                                                                                                                                                                                                                                                                                                                                                                                                                                                                                                                                                                                                                                                                                                                                                                                                                                                                                                                                                                                                                                                                                                                                                                                                                                                                                                                                                                                                                                                                                                                                                                                                                                                                                                                                                                                                                                                                                                                                                                                                                                                                                                                                                                                                                                                                                                                                                                                                                                                                                                                                                                                                                                                                                                                                                                                                                                                                                                                                                                                                                                                                                                                                                                                                                                                                                                                                                                                                                                                                                                                                                                                                                                                                                                                                                                                                                                                                                                                                                                                                                                                                                                                                                                                                                                                                                                                                                                                                                                                                                                                                                                                                                                                                                                                                                                                                                                                                                                                                                                                                                                | 3.031686 | 3.550485 | 4.256702 | 3.594050 |          |          |      |          |    |    |  |  |      |          |          |  |  |  |      |          |          |          |  |  |      |          |          |          |          |  |     |          |          |          |          |          |     |          |          |          |          |          |     |          |          |          |          |          |     |          |          |          |          |          |     |          |          |          |          |          |      |          |          |          |          |          |      |          |          |          |          |          |      |          |          |          |          |          |      |          |          |          |          |          |      |          |          |          |          |          |      |          |          |          |          |          |      |          |          |          |          |          |      |          |          |          |          |          |      |          |          |          |          |          |      |          |          |          |          |          |      |          |          |          |          |          |      |          |          |          |          |          |      |          |          |          |          |          |      |          |          |          |          |          |      |          |          |          |          |          |      |          |          |          |          |          |      |          |          |          |          |          |      |          |          |          |          |          |      |          |          |          |          |          |  |   |   |   |   |    |     |          |  |  |  |  |     |          |          |  |  |  |     |          |          |          |  |  |     |          |          |          |          |  |      |          |          |          |          |          |      |          |          |          |          |          |      |          |          |          |          |          |      |          |          |          |          |          |      |          |          |          |          |          |      |          |          |          |          |          |      |          |          |          |          |          |      |          |          |          |          |          |      |          |          |          |          |          |      |          |          |          |          |          |
| 12 O                                                                                                          | 5.440140                                                                                                                                                                                                                                                                                                                                                                                                                                                                                                                                                                                                                                                                                                                                                                                                                                                                                                                                                                                                                                                                                                                                                                                                                                                                                                                                                                                                                                                                                                                                                                                                                                                                                                                                                                                                                                                                                                                                                                                                                                                                                                                                                                                                                                                                                                                                                                                                                                                                                                                                                                                                                                                                                                                                                                                                                                                                                                                                                                                                                                                                                                                                                                                                                                                                                                                                                                                                                                                                                                                                                                                                                                                                                                                                                                                                                                                                                                                                                                                                                                                                                                                                                                                                                                                                                                                                                                                                                                                                                                                                                                                                                                                                                                                                                                                                                                                                                                                                                                                                                                | 3.031605 | 3.549112 | 4.253958 | 3.593431 |          |          |      |          |    |    |  |  |      |          |          |  |  |  |      |          |          |          |  |  |      |          |          |          |          |  |     |          |          |          |          |          |     |          |          |          |          |          |     |          |          |          |          |          |     |          |          |          |          |          |     |          |          |          |          |          |      |          |          |          |          |          |      |          |          |          |          |          |      |          |          |          |          |          |      |          |          |          |          |          |      |          |          |          |          |          |      |          |          |          |          |          |      |          |          |          |          |          |      |          |          |          |          |          |      |          |          |          |          |          |      |          |          |          |          |          |      |          |          |          |          |          |      |          |          |          |          |          |      |          |          |          |          |          |      |          |          |          |          |          |      |          |          |          |          |          |      |          |          |          |          |          |      |          |          |          |          |          |      |          |          |          |          |          |      |          |          |          |          |          |  |   |   |   |   |    |     |          |  |  |  |  |     |          |          |  |  |  |     |          |          |          |  |  |     |          |          |          |          |  |      |          |          |          |          |          |      |          |          |          |          |          |      |          |          |          |          |          |      |          |          |          |          |          |      |          |          |          |          |          |      |          |          |          |          |          |      |          |          |          |          |          |      |          |          |          |          |          |      |          |          |          |          |          |      |          |          |          |          |          |
| 13 H                                                                                                          | 2.752387                                                                                                                                                                                                                                                                                                                                                                                                                                                                                                                                                                                                                                                                                                                                                                                                                                                                                                                                                                                                                                                                                                                                                                                                                                                                                                                                                                                                                                                                                                                                                                                                                                                                                                                                                                                                                                                                                                                                                                                                                                                                                                                                                                                                                                                                                                                                                                                                                                                                                                                                                                                                                                                                                                                                                                                                                                                                                                                                                                                                                                                                                                                                                                                                                                                                                                                                                                                                                                                                                                                                                                                                                                                                                                                                                                                                                                                                                                                                                                                                                                                                                                                                                                                                                                                                                                                                                                                                                                                                                                                                                                                                                                                                                                                                                                                                                                                                                                                                                                                                                                | 7.001414 | 6.299795 | 6.184648 | 8.075646 |          |          |      |          |    |    |  |  |      |          |          |  |  |  |      |          |          |          |  |  |      |          |          |          |          |  |     |          |          |          |          |          |     |          |          |          |          |          |     |          |          |          |          |          |     |          |          |          |          |          |     |          |          |          |          |          |      |          |          |          |          |          |      |          |          |          |          |          |      |          |          |          |          |          |      |          |          |          |          |          |      |          |          |          |          |          |      |          |          |          |          |          |      |          |          |          |          |          |      |          |          |          |          |          |      |          |          |          |          |          |      |          |          |          |          |          |      |          |          |          |          |          |      |          |          |          |          |          |      |          |          |          |          |          |      |          |          |          |          |          |      |          |          |          |          |          |      |          |          |          |          |          |      |          |          |          |          |          |      |          |          |          |          |          |      |          |          |          |          |          |  |   |   |   |   |    |     |          |  |  |  |  |     |          |          |  |  |  |     |          |          |          |  |  |     |          |          |          |          |  |      |          |          |          |          |          |      |          |          |          |          |          |      |          |          |          |          |          |      |          |          |          |          |          |      |          |          |          |          |          |      |          |          |          |          |          |      |          |          |          |          |          |      |          |          |          |          |          |      |          |          |          |          |          |      |          |          |          |          |          |
| 14 C                                                                                                          | 2.008260                                                                                                                                                                                                                                                                                                                                                                                                                                                                                                                                                                                                                                                                                                                                                                                                                                                                                                                                                                                                                                                                                                                                                                                                                                                                                                                                                                                                                                                                                                                                                                                                                                                                                                                                                                                                                                                                                                                                                                                                                                                                                                                                                                                                                                                                                                                                                                                                                                                                                                                                                                                                                                                                                                                                                                                                                                                                                                                                                                                                                                                                                                                                                                                                                                                                                                                                                                                                                                                                                                                                                                                                                                                                                                                                                                                                                                                                                                                                                                                                                                                                                                                                                                                                                                                                                                                                                                                                                                                                                                                                                                                                                                                                                                                                                                                                                                                                                                                                                                                                                                | 6.395855 | 5.477440 | 5.243154 | 7.663139 |          |          |      |          |    |    |  |  |      |          |          |  |  |  |      |          |          |          |  |  |      |          |          |          |          |  |     |          |          |          |          |          |     |          |          |          |          |          |     |          |          |          |          |          |     |          |          |          |          |          |     |          |          |          |          |          |      |          |          |          |          |          |      |          |          |          |          |          |      |          |          |          |          |          |      |          |          |          |          |          |      |          |          |          |          |          |      |          |          |          |          |          |      |          |          |          |          |          |      |          |          |          |          |          |      |          |          |          |          |          |      |          |          |          |          |          |      |          |          |          |          |          |      |          |          |          |          |          |      |          |          |          |          |          |      |          |          |          |          |          |      |          |          |          |          |          |      |          |          |          |          |          |      |          |          |          |          |          |      |          |          |          |          |          |      |          |          |          |          |          |  |   |   |   |   |    |     |          |  |  |  |  |     |          |          |  |  |  |     |          |          |          |  |  |     |          |          |          |          |  |      |          |          |          |          |          |      |          |          |          |          |          |      |          |          |          |          |          |      |          |          |          |          |          |      |          |          |          |          |          |      |          |          |          |          |          |      |          |          |          |          |          |      |          |          |          |          |          |      |          |          |          |          |          |      |          |          |          |          |          |
| 15 C                                                                                                          | 2.023601                                                                                                                                                                                                                                                                                                                                                                                                                                                                                                                                                                                                                                                                                                                                                                                                                                                                                                                                                                                                                                                                                                                                                                                                                                                                                                                                                                                                                                                                                                                                                                                                                                                                                                                                                                                                                                                                                                                                                                                                                                                                                                                                                                                                                                                                                                                                                                                                                                                                                                                                                                                                                                                                                                                                                                                                                                                                                                                                                                                                                                                                                                                                                                                                                                                                                                                                                                                                                                                                                                                                                                                                                                                                                                                                                                                                                                                                                                                                                                                                                                                                                                                                                                                                                                                                                                                                                                                                                                                                                                                                                                                                                                                                                                                                                                                                                                                                                                                                                                                                                                | 6.156259 | 5.110304 | 4.795008 | 7.524875 |          |          |      |          |    |    |  |  |      |          |          |  |  |  |      |          |          |          |  |  |      |          |          |          |          |  |     |          |          |          |          |          |     |          |          |          |          |          |     |          |          |          |          |          |     |          |          |          |          |          |     |          |          |          |          |          |      |          |          |          |          |          |      |          |          |          |          |          |      |          |          |          |          |          |      |          |          |          |          |          |      |          |          |          |          |          |      |          |          |          |          |          |      |          |          |          |          |          |      |          |          |          |          |          |      |          |          |          |          |          |      |          |          |          |          |          |      |          |          |          |          |          |      |          |          |          |          |          |      |          |          |          |          |          |      |          |          |          |          |          |      |          |          |          |          |          |      |          |          |          |          |          |      |          |          |          |          |          |      |          |          |          |          |          |      |          |          |          |          |          |  |   |   |   |   |    |     |          |  |  |  |  |     |          |          |  |  |  |     |          |          |          |  |  |     |          |          |          |          |  |      |          |          |          |          |          |      |          |          |          |          |          |      |          |          |          |          |          |      |          |          |          |          |          |      |          |          |          |          |          |      |          |          |          |          |          |      |          |          |          |          |          |      |          |          |          |          |          |      |          |          |          |          |          |      |          |          |          |          |          |
| 16 H                                                                                                          | 2.779992                                                                                                                                                                                                                                                                                                                                                                                                                                                                                                                                                                                                                                                                                                                                                                                                                                                                                                                                                                                                                                                                                                                                                                                                                                                                                                                                                                                                                                                                                                                                                                                                                                                                                                                                                                                                                                                                                                                                                                                                                                                                                                                                                                                                                                                                                                                                                                                                                                                                                                                                                                                                                                                                                                                                                                                                                                                                                                                                                                                                                                                                                                                                                                                                                                                                                                                                                                                                                                                                                                                                                                                                                                                                                                                                                                                                                                                                                                                                                                                                                                                                                                                                                                                                                                                                                                                                                                                                                                                                                                                                                                                                                                                                                                                                                                                                                                                                                                                                                                                                                                | 6.370973 | 5.368992 | 5.069830 | 7.701047 |          |          |      |          |    |    |  |  |      |          |          |  |  |  |      |          |          |          |  |  |      |          |          |          |          |  |     |          |          |          |          |          |     |          |          |          |          |          |     |          |          |          |          |          |     |          |          |          |          |          |     |          |          |          |          |          |      |          |          |          |          |          |      |          |          |          |          |          |      |          |          |          |          |          |      |          |          |          |          |          |      |          |          |          |          |          |      |          |          |          |          |          |      |          |          |          |          |          |      |          |          |          |          |          |      |          |          |          |          |          |      |          |          |          |          |          |      |          |          |          |          |          |      |          |          |          |          |          |      |          |          |          |          |          |      |          |          |          |          |          |      |          |          |          |          |          |      |          |          |          |          |          |      |          |          |          |          |          |      |          |          |          |          |          |      |          |          |          |          |          |  |   |   |   |   |    |     |          |  |  |  |  |     |          |          |  |  |  |     |          |          |          |  |  |     |          |          |          |          |  |      |          |          |          |          |          |      |          |          |          |          |          |      |          |          |          |          |          |      |          |          |          |          |          |      |          |          |          |          |          |      |          |          |          |          |          |      |          |          |          |          |          |      |          |          |          |          |          |      |          |          |          |          |          |      |          |          |          |          |          |
| 17 H                                                                                                          | 2.775902                                                                                                                                                                                                                                                                                                                                                                                                                                                                                                                                                                                                                                                                                                                                                                                                                                                                                                                                                                                                                                                                                                                                                                                                                                                                                                                                                                                                                                                                                                                                                                                                                                                                                                                                                                                                                                                                                                                                                                                                                                                                                                                                                                                                                                                                                                                                                                                                                                                                                                                                                                                                                                                                                                                                                                                                                                                                                                                                                                                                                                                                                                                                                                                                                                                                                                                                                                                                                                                                                                                                                                                                                                                                                                                                                                                                                                                                                                                                                                                                                                                                                                                                                                                                                                                                                                                                                                                                                                                                                                                                                                                                                                                                                                                                                                                                                                                                                                                                                                                                                                | 6.586463 | 5.689370 | 5.455760 | 7.830095 |          |          |      |          |    |    |  |  |      |          |          |  |  |  |      |          |          |          |  |  |      |          |          |          |          |  |     |          |          |          |          |          |     |          |          |          |          |          |     |          |          |          |          |          |     |          |          |          |          |          |     |          |          |          |          |          |      |          |          |          |          |          |      |          |          |          |          |          |      |          |          |          |          |          |      |          |          |          |          |          |      |          |          |          |          |          |      |          |          |          |          |          |      |          |          |          |          |          |      |          |          |          |          |          |      |          |          |          |          |          |      |          |          |          |          |          |      |          |          |          |          |          |      |          |          |          |          |          |      |          |          |          |          |          |      |          |          |          |          |          |      |          |          |          |          |          |      |          |          |          |          |          |      |          |          |          |          |          |      |          |          |          |          |          |      |          |          |          |          |          |  |   |   |   |   |    |     |          |  |  |  |  |     |          |          |  |  |  |     |          |          |          |  |  |     |          |          |          |          |  |      |          |          |          |          |          |      |          |          |          |          |          |      |          |          |          |          |          |      |          |          |          |          |          |      |          |          |          |          |          |      |          |          |          |          |          |      |          |          |          |          |          |      |          |          |          |          |          |      |          |          |          |          |          |      |          |          |          |          |          |
| 18 C                                                                                                          | 2.015348                                                                                                                                                                                                                                                                                                                                                                                                                                                                                                                                                                                                                                                                                                                                                                                                                                                                                                                                                                                                                                                                                                                                                                                                                                                                                                                                                                                                                                                                                                                                                                                                                                                                                                                                                                                                                                                                                                                                                                                                                                                                                                                                                                                                                                                                                                                                                                                                                                                                                                                                                                                                                                                                                                                                                                                                                                                                                                                                                                                                                                                                                                                                                                                                                                                                                                                                                                                                                                                                                                                                                                                                                                                                                                                                                                                                                                                                                                                                                                                                                                                                                                                                                                                                                                                                                                                                                                                                                                                                                                                                                                                                                                                                                                                                                                                                                                                                                                                                                                                                                                | 5.584137 | 4.207253 | 3.658907 | 7.188106 |          |          |      |          |    |    |  |  |      |          |          |  |  |  |      |          |          |          |  |  |      |          |          |          |          |  |     |          |          |          |          |          |     |          |          |          |          |          |     |          |          |          |          |          |     |          |          |          |          |          |     |          |          |          |          |          |      |          |          |          |          |          |      |          |          |          |          |          |      |          |          |          |          |          |      |          |          |          |          |          |      |          |          |          |          |          |      |          |          |          |          |          |      |          |          |          |          |          |      |          |          |          |          |          |      |          |          |          |          |          |      |          |          |          |          |          |      |          |          |          |          |          |      |          |          |          |          |          |      |          |          |          |          |          |      |          |          |          |          |          |      |          |          |          |          |          |      |          |          |          |          |          |      |          |          |          |          |          |      |          |          |          |          |          |      |          |          |          |          |          |  |   |   |   |   |    |     |          |  |  |  |  |     |          |          |  |  |  |     |          |          |          |  |  |     |          |          |          |          |  |      |          |          |          |          |          |      |          |          |          |          |          |      |          |          |          |          |          |      |          |          |          |          |          |      |          |          |          |          |          |      |          |          |          |          |          |      |          |          |          |          |          |      |          |          |          |          |          |      |          |          |          |          |          |      |          |          |          |          |          |
| 19 H                                                                                                          | 2.759716                                                                                                                                                                                                                                                                                                                                                                                                                                                                                                                                                                                                                                                                                                                                                                                                                                                                                                                                                                                                                                                                                                                                                                                                                                                                                                                                                                                                                                                                                                                                                                                                                                                                                                                                                                                                                                                                                                                                                                                                                                                                                                                                                                                                                                                                                                                                                                                                                                                                                                                                                                                                                                                                                                                                                                                                                                                                                                                                                                                                                                                                                                                                                                                                                                                                                                                                                                                                                                                                                                                                                                                                                                                                                                                                                                                                                                                                                                                                                                                                                                                                                                                                                                                                                                                                                                                                                                                                                                                                                                                                                                                                                                                                                                                                                                                                                                                                                                                                                                                                                                | 5.524962 | 4.038923 | 3.385616 | 7.195633 |          |          |      |          |    |    |  |  |      |          |          |  |  |  |      |          |          |          |  |  |      |          |          |          |          |  |     |          |          |          |          |          |     |          |          |          |          |          |     |          |          |          |          |          |     |          |          |          |          |          |     |          |          |          |          |          |      |          |          |          |          |          |      |          |          |          |          |          |      |          |          |          |          |          |      |          |          |          |          |          |      |          |          |          |          |          |      |          |          |          |          |          |      |          |          |          |          |          |      |          |          |          |          |          |      |          |          |          |          |          |      |          |          |          |          |          |      |          |          |          |          |          |      |          |          |          |          |          |      |          |          |          |          |          |      |          |          |          |          |          |      |          |          |          |          |          |      |          |          |          |          |          |      |          |          |          |          |          |      |          |          |          |          |          |      |          |          |          |          |          |  |   |   |   |   |    |     |          |  |  |  |  |     |          |          |  |  |  |     |          |          |          |  |  |     |          |          |          |          |  |      |          |          |          |          |          |      |          |          |          |          |          |      |          |          |          |          |          |      |          |          |          |          |          |      |          |          |          |          |          |      |          |          |          |          |          |      |          |          |          |          |          |      |          |          |          |          |          |      |          |          |          |          |          |      |          |          |          |          |          |
| 20 C                                                                                                          | 2.009799                                                                                                                                                                                                                                                                                                                                                                                                                                                                                                                                                                                                                                                                                                                                                                                                                                                                                                                                                                                                                                                                                                                                                                                                                                                                                                                                                                                                                                                                                                                                                                                                                                                                                                                                                                                                                                                                                                                                                                                                                                                                                                                                                                                                                                                                                                                                                                                                                                                                                                                                                                                                                                                                                                                                                                                                                                                                                                                                                                                                                                                                                                                                                                                                                                                                                                                                                                                                                                                                                                                                                                                                                                                                                                                                                                                                                                                                                                                                                                                                                                                                                                                                                                                                                                                                                                                                                                                                                                                                                                                                                                                                                                                                                                                                                                                                                                                                                                                                                                                                                                | 5.494443 | 4.060605 | 3.467170 | 7.134858 |          |          |      |          |    |    |  |  |      |          |          |  |  |  |      |          |          |          |  |  |      |          |          |          |          |  |     |          |          |          |          |          |     |          |          |          |          |          |     |          |          |          |          |          |     |          |          |          |          |          |     |          |          |          |          |          |      |          |          |          |          |          |      |          |          |          |          |          |      |          |          |          |          |          |      |          |          |          |          |          |      |          |          |          |          |          |      |          |          |          |          |          |      |          |          |          |          |          |      |          |          |          |          |          |      |          |          |          |          |          |      |          |          |          |          |          |      |          |          |          |          |          |      |          |          |          |          |          |      |          |          |          |          |          |      |          |          |          |          |          |      |          |          |          |          |          |      |          |          |          |          |          |      |          |          |          |          |          |      |          |          |          |          |          |      |          |          |          |          |          |  |   |   |   |   |    |     |          |  |  |  |  |     |          |          |  |  |  |     |          |          |          |  |  |     |          |          |          |          |  |      |          |          |          |          |          |      |          |          |          |          |          |      |          |          |          |          |          |      |          |          |          |          |          |      |          |          |          |          |          |      |          |          |          |          |          |      |          |          |          |          |          |      |          |          |          |          |          |      |          |          |          |          |          |      |          |          |          |          |          |
| 21 H                                                                                                          | 2.748646                                                                                                                                                                                                                                                                                                                                                                                                                                                                                                                                                                                                                                                                                                                                                                                                                                                                                                                                                                                                                                                                                                                                                                                                                                                                                                                                                                                                                                                                                                                                                                                                                                                                                                                                                                                                                                                                                                                                                                                                                                                                                                                                                                                                                                                                                                                                                                                                                                                                                                                                                                                                                                                                                                                                                                                                                                                                                                                                                                                                                                                                                                                                                                                                                                                                                                                                                                                                                                                                                                                                                                                                                                                                                                                                                                                                                                                                                                                                                                                                                                                                                                                                                                                                                                                                                                                                                                                                                                                                                                                                                                                                                                                                                                                                                                                                                                                                                                                                                                                                                                | 5.346899 | 3.739722 | 2.976139 | 7.089135 |          |          |      |          |    |    |  |  |      |          |          |  |  |  |      |          |          |          |  |  |      |          |          |          |          |  |     |          |          |          |          |          |     |          |          |          |          |          |     |          |          |          |          |          |     |          |          |          |          |          |     |          |          |          |          |          |      |          |          |          |          |          |      |          |          |          |          |          |      |          |          |          |          |          |      |          |          |          |          |          |      |          |          |          |          |          |      |          |          |          |          |          |      |          |          |          |          |          |      |          |          |          |          |          |      |          |          |          |          |          |      |          |          |          |          |          |      |          |          |          |          |          |      |          |          |          |          |          |      |          |          |          |          |          |      |          |          |          |          |          |      |          |          |          |          |          |      |          |          |          |          |          |      |          |          |          |          |          |      |          |          |          |          |          |      |          |          |          |          |          |  |   |   |   |   |    |     |          |  |  |  |  |     |          |          |  |  |  |     |          |          |          |  |  |     |          |          |          |          |  |      |          |          |          |          |          |      |          |          |          |          |          |      |          |          |          |          |          |      |          |          |          |          |          |      |          |          |          |          |          |      |          |          |          |          |          |      |          |          |          |          |          |      |          |          |          |          |          |      |          |          |          |          |          |      |          |          |          |          |          |
| 22 C                                                                                                          | 2.028042                                                                                                                                                                                                                                                                                                                                                                                                                                                                                                                                                                                                                                                                                                                                                                                                                                                                                                                                                                                                                                                                                                                                                                                                                                                                                                                                                                                                                                                                                                                                                                                                                                                                                                                                                                                                                                                                                                                                                                                                                                                                                                                                                                                                                                                                                                                                                                                                                                                                                                                                                                                                                                                                                                                                                                                                                                                                                                                                                                                                                                                                                                                                                                                                                                                                                                                                                                                                                                                                                                                                                                                                                                                                                                                                                                                                                                                                                                                                                                                                                                                                                                                                                                                                                                                                                                                                                                                                                                                                                                                                                                                                                                                                                                                                                                                                                                                                                                                                                                                                                                | 6.037423 | 4.925949 | 4.567820 | 7.456238 |          |          |      |          |    |    |  |  |      |          |          |  |  |  |      |          |          |          |  |  |      |          |          |          |          |  |     |          |          |          |          |          |     |          |          |          |          |          |     |          |          |          |          |          |     |          |          |          |          |          |     |          |          |          |          |          |      |          |          |          |          |          |      |          |          |          |          |          |      |          |          |          |          |          |      |          |          |          |          |          |      |          |          |          |          |          |      |          |          |          |          |          |      |          |          |          |          |          |      |          |          |          |          |          |      |          |          |          |          |          |      |          |          |          |          |          |      |          |          |          |          |          |      |          |          |          |          |          |      |          |          |          |          |          |      |          |          |          |          |          |      |          |          |          |          |          |      |          |          |          |          |          |      |          |          |          |          |          |      |          |          |          |          |          |      |          |          |          |          |          |  |   |   |   |   |    |     |          |  |  |  |  |     |          |          |  |  |  |     |          |          |          |  |  |     |          |          |          |          |  |      |          |          |          |          |          |      |          |          |          |          |          |      |          |          |          |          |          |      |          |          |          |          |          |      |          |          |          |          |          |      |          |          |          |          |          |      |          |          |          |          |          |      |          |          |          |          |          |      |          |          |          |          |          |      |          |          |          |          |          |
| 23 S                                                                                                          | 2.118586                                                                                                                                                                                                                                                                                                                                                                                                                                                                                                                                                                                                                                                                                                                                                                                                                                                                                                                                                                                                                                                                                                                                                                                                                                                                                                                                                                                                                                                                                                                                                                                                                                                                                                                                                                                                                                                                                                                                                                                                                                                                                                                                                                                                                                                                                                                                                                                                                                                                                                                                                                                                                                                                                                                                                                                                                                                                                                                                                                                                                                                                                                                                                                                                                                                                                                                                                                                                                                                                                                                                                                                                                                                                                                                                                                                                                                                                                                                                                                                                                                                                                                                                                                                                                                                                                                                                                                                                                                                                                                                                                                                                                                                                                                                                                                                                                                                                                                                                                                                                                                | 3.610239 | 3.399554 | 3.806752 | 4.637073 |          |          |      |          |    |    |  |  |      |          |          |  |  |  |      |          |          |          |  |  |      |          |          |          |          |  |     |          |          |          |          |          |     |          |          |          |          |          |     |          |          |          |          |          |     |          |          |          |          |          |     |          |          |          |          |          |      |          |          |          |          |          |      |          |          |          |          |          |      |          |          |          |          |          |      |          |          |          |          |          |      |          |          |          |          |          |      |          |          |          |          |          |      |          |          |          |          |          |      |          |          |          |          |          |      |          |          |          |          |          |      |          |          |          |          |          |      |          |          |          |          |          |      |          |          |          |          |          |      |          |          |          |          |          |      |          |          |          |          |          |      |          |          |          |          |          |      |          |          |          |          |          |      |          |          |          |          |          |      |          |          |          |          |          |      |          |          |          |          |          |  |   |   |   |   |    |     |          |  |  |  |  |     |          |          |  |  |  |     |          |          |          |  |  |     |          |          |          |          |  |      |          |          |          |          |          |      |          |          |          |          |          |      |          |          |          |          |          |      |          |          |          |          |          |      |          |          |          |          |          |      |          |          |          |          |          |      |          |          |          |          |          |      |          |          |          |          |          |      |          |          |          |          |          |      |          |          |          |          |          |
| 24 S                                                                                                          | 2.119151                                                                                                                                                                                                                                                                                                                                                                                                                                                                                                                                                                                                                                                                                                                                                                                                                                                                                                                                                                                                                                                                                                                                                                                                                                                                                                                                                                                                                                                                                                                                                                                                                                                                                                                                                                                                                                                                                                                                                                                                                                                                                                                                                                                                                                                                                                                                                                                                                                                                                                                                                                                                                                                                                                                                                                                                                                                                                                                                                                                                                                                                                                                                                                                                                                                                                                                                                                                                                                                                                                                                                                                                                                                                                                                                                                                                                                                                                                                                                                                                                                                                                                                                                                                                                                                                                                                                                                                                                                                                                                                                                                                                                                                                                                                                                                                                                                                                                                                                                                                                                                | 3.610669 | 3.402403 | 3.811091 | 4.636387 |          |          |      |          |    |    |  |  |      |          |          |  |  |  |      |          |          |          |  |  |      |          |          |          |          |  |     |          |          |          |          |          |     |          |          |          |          |          |     |          |          |          |          |          |     |          |          |          |          |          |     |          |          |          |          |          |      |          |          |          |          |          |      |          |          |          |          |          |      |          |          |          |          |          |      |          |          |          |          |          |      |          |          |          |          |          |      |          |          |          |          |          |      |          |          |          |          |          |      |          |          |          |          |          |      |          |          |          |          |          |      |          |          |          |          |          |      |          |          |          |          |          |      |          |          |          |          |          |      |          |          |          |          |          |      |          |          |          |          |          |      |          |          |          |          |          |      |          |          |          |          |          |      |          |          |          |          |          |      |          |          |          |          |          |      |          |          |          |          |          |  |   |   |   |   |    |     |          |  |  |  |  |     |          |          |  |  |  |     |          |          |          |  |  |     |          |          |          |          |  |      |          |          |          |          |          |      |          |          |          |          |          |      |          |          |          |          |          |      |          |          |          |          |          |      |          |          |          |          |          |      |          |          |          |          |          |      |          |          |          |          |          |      |          |          |          |          |          |      |          |          |          |          |          |      |          |          |          |          |          |
| 25 C                                                                                                          | 3.054627                                                                                                                                                                                                                                                                                                                                                                                                                                                                                                                                                                                                                                                                                                                                                                                                                                                                                                                                                                                                                                                                                                                                                                                                                                                                                                                                                                                                                                                                                                                                                                                                                                                                                                                                                                                                                                                                                                                                                                                                                                                                                                                                                                                                                                                                                                                                                                                                                                                                                                                                                                                                                                                                                                                                                                                                                                                                                                                                                                                                                                                                                                                                                                                                                                                                                                                                                                                                                                                                                                                                                                                                                                                                                                                                                                                                                                                                                                                                                                                                                                                                                                                                                                                                                                                                                                                                                                                                                                                                                                                                                                                                                                                                                                                                                                                                                                                                                                                                                                                                                                | 2.459832 | 3.133060 | 3.981272 | 3.049459 |          |          |      |          |    |    |  |  |      |          |          |  |  |  |      |          |          |          |  |  |      |          |          |          |          |  |     |          |          |          |          |          |     |          |          |          |          |          |     |          |          |          |          |          |     |          |          |          |          |          |     |          |          |          |          |          |      |          |          |          |          |          |      |          |          |          |          |          |      |          |          |          |          |          |      |          |          |          |          |          |      |          |          |          |          |          |      |          |          |          |          |          |      |          |          |          |          |          |      |          |          |          |          |          |      |          |          |          |          |          |      |          |          |          |          |          |      |          |          |          |          |          |      |          |          |          |          |          |      |          |          |          |          |          |      |          |          |          |          |          |      |          |          |          |          |          |      |          |          |          |          |          |      |          |          |          |          |          |      |          |          |          |          |          |      |          |          |          |          |          |  |   |   |   |   |    |     |          |  |  |  |  |     |          |          |  |  |  |     |          |          |          |  |  |     |          |          |          |          |  |      |          |          |          |          |          |      |          |          |          |          |          |      |          |          |          |          |          |      |          |          |          |          |          |      |          |          |          |          |          |      |          |          |          |          |          |      |          |          |          |          |          |      |          |          |          |          |          |      |          |          |          |          |          |      |          |          |          |          |          |
| 26 C                                                                                                          | 3.054493                                                                                                                                                                                                                                                                                                                                                                                                                                                                                                                                                                                                                                                                                                                                                                                                                                                                                                                                                                                                                                                                                                                                                                                                                                                                                                                                                                                                                                                                                                                                                                                                                                                                                                                                                                                                                                                                                                                                                                                                                                                                                                                                                                                                                                                                                                                                                                                                                                                                                                                                                                                                                                                                                                                                                                                                                                                                                                                                                                                                                                                                                                                                                                                                                                                                                                                                                                                                                                                                                                                                                                                                                                                                                                                                                                                                                                                                                                                                                                                                                                                                                                                                                                                                                                                                                                                                                                                                                                                                                                                                                                                                                                                                                                                                                                                                                                                                                                                                                                                                                                | 2.460479 | 3.134690 | 3.983311 | 3.049325 |          |          |      |          |    |    |  |  |      |          |          |  |  |  |      |          |          |          |  |  |      |          |          |          |          |  |     |          |          |          |          |          |     |          |          |          |          |          |     |          |          |          |          |          |     |          |          |          |          |          |     |          |          |          |          |          |      |          |          |          |          |          |      |          |          |          |          |          |      |          |          |          |          |          |      |          |          |          |          |          |      |          |          |          |          |          |      |          |          |          |          |          |      |          |          |          |          |          |      |          |          |          |          |          |      |          |          |          |          |          |      |          |          |          |          |          |      |          |          |          |          |          |      |          |          |          |          |          |      |          |          |          |          |          |      |          |          |          |          |          |      |          |          |          |          |          |      |          |          |          |          |          |      |          |          |          |          |          |      |          |          |          |          |          |      |          |          |          |          |          |  |   |   |   |   |    |     |          |  |  |  |  |     |          |          |  |  |  |     |          |          |          |  |  |     |          |          |          |          |  |      |          |          |          |          |          |      |          |          |          |          |          |      |          |          |          |          |          |      |          |          |          |          |          |      |          |          |          |          |          |      |          |          |          |          |          |      |          |          |          |          |          |      |          |          |          |          |          |      |          |          |          |          |          |      |          |          |          |          |          |
| 27 H                                                                                                          | 4.057372                                                                                                                                                                                                                                                                                                                                                                                                                                                                                                                                                                                                                                                                                                                                                                                                                                                                                                                                                                                                                                                                                                                                                                                                                                                                                                                                                                                                                                                                                                                                                                                                                                                                                                                                                                                                                                                                                                                                                                                                                                                                                                                                                                                                                                                                                                                                                                                                                                                                                                                                                                                                                                                                                                                                                                                                                                                                                                                                                                                                                                                                                                                                                                                                                                                                                                                                                                                                                                                                                                                                                                                                                                                                                                                                                                                                                                                                                                                                                                                                                                                                                                                                                                                                                                                                                                                                                                                                                                                                                                                                                                                                                                                                                                                                                                                                                                                                                                                                                                                                                                | 2.822796 | 3.902514 | 4.835359 | 2.778534 |          |          |      |          |    |    |  |  |      |          |          |  |  |  |      |          |          |          |  |  |      |          |          |          |          |  |     |          |          |          |          |          |     |          |          |          |          |          |     |          |          |          |          |          |     |          |          |          |          |          |     |          |          |          |          |          |      |          |          |          |          |          |      |          |          |          |          |          |      |          |          |          |          |          |      |          |          |          |          |          |      |          |          |          |          |          |      |          |          |          |          |          |      |          |          |          |          |          |      |          |          |          |          |          |      |          |          |          |          |          |      |          |          |          |          |          |      |          |          |          |          |          |      |          |          |          |          |          |      |          |          |          |          |          |      |          |          |          |          |          |      |          |          |          |          |          |      |          |          |          |          |          |      |          |          |          |          |          |      |          |          |          |          |          |      |          |          |          |          |          |  |   |   |   |   |    |     |          |  |  |  |  |     |          |          |  |  |  |     |          |          |          |  |  |     |          |          |          |          |  |      |          |          |          |          |          |      |          |          |          |          |          |      |          |          |          |          |          |      |          |          |          |          |          |      |          |          |          |          |          |      |          |          |          |          |          |      |          |          |          |          |          |      |          |          |          |          |          |      |          |          |          |          |          |      |          |          |          |          |          |
| 28 H                                                                                                          | 4.057247                                                                                                                                                                                                                                                                                                                                                                                                                                                                                                                                                                                                                                                                                                                                                                                                                                                                                                                                                                                                                                                                                                                                                                                                                                                                                                                                                                                                                                                                                                                                                                                                                                                                                                                                                                                                                                                                                                                                                                                                                                                                                                                                                                                                                                                                                                                                                                                                                                                                                                                                                                                                                                                                                                                                                                                                                                                                                                                                                                                                                                                                                                                                                                                                                                                                                                                                                                                                                                                                                                                                                                                                                                                                                                                                                                                                                                                                                                                                                                                                                                                                                                                                                                                                                                                                                                                                                                                                                                                                                                                                                                                                                                                                                                                                                                                                                                                                                                                                                                                                                                | 2.822435 | 3.900493 | 4.832543 | 2.779644 |          |          |      |          |    |    |  |  |      |          |          |  |  |  |      |          |          |          |  |  |      |          |          |          |          |  |     |          |          |          |          |          |     |          |          |          |          |          |     |          |          |          |          |          |     |          |          |          |          |          |     |          |          |          |          |          |      |          |          |          |          |          |      |          |          |          |          |          |      |          |          |          |          |          |      |          |          |          |          |          |      |          |          |          |          |          |      |          |          |          |          |          |      |          |          |          |          |          |      |          |          |          |          |          |      |          |          |          |          |          |      |          |          |          |          |          |      |          |          |          |          |          |      |          |          |          |          |          |      |          |          |          |          |          |      |          |          |          |          |          |      |          |          |          |          |          |      |          |          |          |          |          |      |          |          |          |          |          |      |          |          |          |          |          |      |          |          |          |          |          |  |   |   |   |   |    |     |          |  |  |  |  |     |          |          |  |  |  |     |          |          |          |  |  |     |          |          |          |          |  |      |          |          |          |          |          |      |          |          |          |          |          |      |          |          |          |          |          |      |          |          |          |          |          |      |          |          |          |          |          |      |          |          |          |          |          |      |          |          |          |          |          |      |          |          |          |          |          |      |          |          |          |          |          |      |          |          |          |          |          |
|                                                                                                               | 6                                                                                                                                                                                                                                                                                                                                                                                                                                                                                                                                                                                                                                                                                                                                                                                                                                                                                                                                                                                                                                                                                                                                                                                                                                                                                                                                                                                                                                                                                                                                                                                                                                                                                                                                                                                                                                                                                                                                                                                                                                                                                                                                                                                                                                                                                                                                                                                                                                                                                                                                                                                                                                                                                                                                                                                                                                                                                                                                                                                                                                                                                                                                                                                                                                                                                                                                                                                                                                                                                                                                                                                                                                                                                                                                                                                                                                                                                                                                                                                                                                                                                                                                                                                                                                                                                                                                                                                                                                                                                                                                                                                                                                                                                                                                                                                                                                                                                                                                                                                                                                       | 7        | 8        | 9        | 10       |          |          |      |          |    |    |  |  |      |          |          |  |  |  |      |          |          |          |  |  |      |          |          |          |          |  |     |          |          |          |          |          |     |          |          |          |          |          |     |          |          |          |          |          |     |          |          |          |          |          |     |          |          |          |          |          |      |          |          |          |          |          |      |          |          |          |          |          |      |          |          |          |          |          |      |          |          |          |          |          |      |          |          |          |          |          |      |          |          |          |          |          |      |          |          |          |          |          |      |          |          |          |          |          |      |          |          |          |          |          |      |          |          |          |          |          |      |          |          |          |          |          |      |          |          |          |          |          |      |          |          |          |          |          |      |          |          |          |          |          |      |          |          |          |          |          |      |          |          |          |          |          |      |          |          |          |          |          |      |          |          |          |          |          |      |          |          |          |          |          |  |   |   |   |   |    |     |          |  |  |  |  |     |          |          |  |  |  |     |          |          |          |  |  |     |          |          |          |          |  |      |          |          |          |          |          |      |          |          |          |          |          |      |          |          |          |          |          |      |          |          |          |          |          |      |          |          |          |          |          |      |          |          |          |          |          |      |          |          |          |          |          |      |          |          |          |          |          |      |          |          |          |          |          |      |          |          |          |          |          |
| 6 O                                                                                                           | 0.000000                                                                                                                                                                                                                                                                                                                                                                                                                                                                                                                                                                                                                                                                                                                                                                                                                                                                                                                                                                                                                                                                                                                                                                                                                                                                                                                                                                                                                                                                                                                                                                                                                                                                                                                                                                                                                                                                                                                                                                                                                                                                                                                                                                                                                                                                                                                                                                                                                                                                                                                                                                                                                                                                                                                                                                                                                                                                                                                                                                                                                                                                                                                                                                                                                                                                                                                                                                                                                                                                                                                                                                                                                                                                                                                                                                                                                                                                                                                                                                                                                                                                                                                                                                                                                                                                                                                                                                                                                                                                                                                                                                                                                                                                                                                                                                                                                                                                                                                                                                                                                                |          |          |          |          |          |          |      |          |    |    |  |  |      |          |          |  |  |  |      |          |          |          |  |  |      |          |          |          |          |  |     |          |          |          |          |          |     |          |          |          |          |          |     |          |          |          |          |          |     |          |          |          |          |          |     |          |          |          |          |          |      |          |          |          |          |          |      |          |          |          |          |          |      |          |          |          |          |          |      |          |          |          |          |          |      |          |          |          |          |          |      |          |          |          |          |          |      |          |          |          |          |          |      |          |          |          |          |          |      |          |          |          |          |          |      |          |          |          |          |          |      |          |          |          |          |          |      |          |          |          |          |          |      |          |          |          |          |          |      |          |          |          |          |          |      |          |          |          |          |          |      |          |          |          |          |          |      |          |          |          |          |          |      |          |          |          |          |          |      |          |          |          |          |          |  |   |   |   |   |    |     |          |  |  |  |  |     |          |          |  |  |  |     |          |          |          |  |  |     |          |          |          |          |  |      |          |          |          |          |          |      |          |          |          |          |          |      |          |          |          |          |          |      |          |          |          |          |          |      |          |          |          |          |          |      |          |          |          |          |          |      |          |          |          |          |          |      |          |          |          |          |          |      |          |          |          |          |          |      |          |          |          |          |          |
| 7 C                                                                                                           | 3.538781                                                                                                                                                                                                                                                                                                                                                                                                                                                                                                                                                                                                                                                                                                                                                                                                                                                                                                                                                                                                                                                                                                                                                                                                                                                                                                                                                                                                                                                                                                                                                                                                                                                                                                                                                                                                                                                                                                                                                                                                                                                                                                                                                                                                                                                                                                                                                                                                                                                                                                                                                                                                                                                                                                                                                                                                                                                                                                                                                                                                                                                                                                                                                                                                                                                                                                                                                                                                                                                                                                                                                                                                                                                                                                                                                                                                                                                                                                                                                                                                                                                                                                                                                                                                                                                                                                                                                                                                                                                                                                                                                                                                                                                                                                                                                                                                                                                                                                                                                                                                                                | 0.000000 |          |          |          |          |          |      |          |    |    |  |  |      |          |          |  |  |  |      |          |          |          |  |  |      |          |          |          |          |  |     |          |          |          |          |          |     |          |          |          |          |          |     |          |          |          |          |          |     |          |          |          |          |          |     |          |          |          |          |          |      |          |          |          |          |          |      |          |          |          |          |          |      |          |          |          |          |          |      |          |          |          |          |          |      |          |          |          |          |          |      |          |          |          |          |          |      |          |          |          |          |          |      |          |          |          |          |          |      |          |          |          |          |          |      |          |          |          |          |          |      |          |          |          |          |          |      |          |          |          |          |          |      |          |          |          |          |          |      |          |          |          |          |          |      |          |          |          |          |          |      |          |          |          |          |          |      |          |          |          |          |          |      |          |          |          |          |          |      |          |          |          |          |          |  |   |   |   |   |    |     |          |  |  |  |  |     |          |          |  |  |  |     |          |          |          |  |  |     |          |          |          |          |  |      |          |          |          |          |          |      |          |          |          |          |          |      |          |          |          |          |          |      |          |          |          |          |          |      |          |          |          |          |          |      |          |          |          |          |          |      |          |          |          |          |          |      |          |          |          |          |          |      |          |          |          |          |          |      |          |          |          |          |          |
| 8 O                                                                                                           | 4.246021                                                                                                                                                                                                                                                                                                                                                                                                                                                                                                                                                                                                                                                                                                                                                                                                                                                                                                                                                                                                                                                                                                                                                                                                                                                                                                                                                                                                                                                                                                                                                                                                                                                                                                                                                                                                                                                                                                                                                                                                                                                                                                                                                                                                                                                                                                                                                                                                                                                                                                                                                                                                                                                                                                                                                                                                                                                                                                                                                                                                                                                                                                                                                                                                                                                                                                                                                                                                                                                                                                                                                                                                                                                                                                                                                                                                                                                                                                                                                                                                                                                                                                                                                                                                                                                                                                                                                                                                                                                                                                                                                                                                                                                                                                                                                                                                                                                                                                                                                                                                                                | 1.146818 | 0.000000 |          |          |          |          |      |          |    |    |  |  |      |          |          |  |  |  |      |          |          |          |  |  |      |          |          |          |          |  |     |          |          |          |          |          |     |          |          |          |          |          |     |          |          |          |          |          |     |          |          |          |          |          |     |          |          |          |          |          |      |          |          |          |          |          |      |          |          |          |          |          |      |          |          |          |          |          |      |          |          |          |          |          |      |          |          |          |          |          |      |          |          |          |          |          |      |          |          |          |          |          |      |          |          |          |          |          |      |          |          |          |          |          |      |          |          |          |          |          |      |          |          |          |          |          |      |          |          |          |          |          |      |          |          |          |          |          |      |          |          |          |          |          |      |          |          |          |          |          |      |          |          |          |          |          |      |          |          |          |          |          |      |          |          |          |          |          |      |          |          |          |          |          |  |   |   |   |   |    |     |          |  |  |  |  |     |          |          |  |  |  |     |          |          |          |  |  |     |          |          |          |          |  |      |          |          |          |          |          |      |          |          |          |          |          |      |          |          |          |          |          |      |          |          |          |          |          |      |          |          |          |          |          |      |          |          |          |          |          |      |          |          |          |          |          |      |          |          |          |          |          |      |          |          |          |          |          |      |          |          |          |          |          |
| 9 C                                                                                                           | 3.588900                                                                                                                                                                                                                                                                                                                                                                                                                                                                                                                                                                                                                                                                                                                                                                                                                                                                                                                                                                                                                                                                                                                                                                                                                                                                                                                                                                                                                                                                                                                                                                                                                                                                                                                                                                                                                                                                                                                                                                                                                                                                                                                                                                                                                                                                                                                                                                                                                                                                                                                                                                                                                                                                                                                                                                                                                                                                                                                                                                                                                                                                                                                                                                                                                                                                                                                                                                                                                                                                                                                                                                                                                                                                                                                                                                                                                                                                                                                                                                                                                                                                                                                                                                                                                                                                                                                                                                                                                                                                                                                                                                                                                                                                                                                                                                                                                                                                                                                                                                                                                                | 2.577661 | 3.461780 | 0.000000 |          |          |          |      |          |    |    |  |  |      |          |          |  |  |  |      |          |          |          |  |  |      |          |          |          |          |  |     |          |          |          |          |          |     |          |          |          |          |          |     |          |          |          |          |          |     |          |          |          |          |          |     |          |          |          |          |          |      |          |          |          |          |          |      |          |          |          |          |          |      |          |          |          |          |          |      |          |          |          |          |          |      |          |          |          |          |          |      |          |          |          |          |          |      |          |          |          |          |          |      |          |          |          |          |          |      |          |          |          |          |          |      |          |          |          |          |          |      |          |          |          |          |          |      |          |          |          |          |          |      |          |          |          |          |          |      |          |          |          |          |          |      |          |          |          |          |          |      |          |          |          |          |          |      |          |          |          |          |          |      |          |          |          |          |          |      |          |          |          |          |          |  |   |   |   |   |    |     |          |  |  |  |  |     |          |          |  |  |  |     |          |          |          |  |  |     |          |          |          |          |  |      |          |          |          |          |          |      |          |          |          |          |          |      |          |          |          |          |          |      |          |          |          |          |          |      |          |          |          |          |          |      |          |          |          |          |          |      |          |          |          |          |          |      |          |          |          |          |          |      |          |          |          |          |          |      |          |          |          |          |          |
| 10 C                                                                                                          | 3.590040                                                                                                                                                                                                                                                                                                                                                                                                                                                                                                                                                                                                                                                                                                                                                                                                                                                                                                                                                                                                                                                                                                                                                                                                                                                                                                                                                                                                                                                                                                                                                                                                                                                                                                                                                                                                                                                                                                                                                                                                                                                                                                                                                                                                                                                                                                                                                                                                                                                                                                                                                                                                                                                                                                                                                                                                                                                                                                                                                                                                                                                                                                                                                                                                                                                                                                                                                                                                                                                                                                                                                                                                                                                                                                                                                                                                                                                                                                                                                                                                                                                                                                                                                                                                                                                                                                                                                                                                                                                                                                                                                                                                                                                                                                                                                                                                                                                                                                                                                                                                                                | 2.577179 | 3.460954 | 3.777060 | 0.000000 |          |          |      |          |    |    |  |  |      |          |          |  |  |  |      |          |          |          |  |  |      |          |          |          |          |  |     |          |          |          |          |          |     |          |          |          |          |          |     |          |          |          |          |          |     |          |          |          |          |          |     |          |          |          |          |          |      |          |          |          |          |          |      |          |          |          |          |          |      |          |          |          |          |          |      |          |          |          |          |          |      |          |          |          |          |          |      |          |          |          |          |          |      |          |          |          |          |          |      |          |          |          |          |          |      |          |          |          |          |          |      |          |          |          |          |          |      |          |          |          |          |          |      |          |          |          |          |          |      |          |          |          |          |          |      |          |          |          |          |          |      |          |          |          |          |          |      |          |          |          |          |          |      |          |          |          |          |          |      |          |          |          |          |          |      |          |          |          |          |          |  |   |   |   |   |    |     |          |  |  |  |  |     |          |          |  |  |  |     |          |          |          |  |  |     |          |          |          |          |  |      |          |          |          |          |          |      |          |          |          |          |          |      |          |          |          |          |          |      |          |          |          |          |          |      |          |          |          |          |          |      |          |          |          |          |          |      |          |          |          |          |          |      |          |          |          |          |          |      |          |          |          |          |          |      |          |          |          |          |          |
| 11 O                                                                                                          | 4.316232                                                                                                                                                                                                                                                                                                                                                                                                                                                                                                                                                                                                                                                                                                                                                                                                                                                                                                                                                                                                                                                                                                                                                                                                                                                                                                                                                                                                                                                                                                                                                                                                                                                                                                                                                                                                                                                                                                                                                                                                                                                                                                                                                                                                                                                                                                                                                                                                                                                                                                                                                                                                                                                                                                                                                                                                                                                                                                                                                                                                                                                                                                                                                                                                                                                                                                                                                                                                                                                                                                                                                                                                                                                                                                                                                                                                                                                                                                                                                                                                                                                                                                                                                                                                                                                                                                                                                                                                                                                                                                                                                                                                                                                                                                                                                                                                                                                                                                                                                                                                                                | 3.448662 | 4.123207 | 4.915461 | 1.141866 |          |          |      |          |    |    |  |  |      |          |          |  |  |  |      |          |          |          |  |  |      |          |          |          |          |  |     |          |          |          |          |          |     |          |          |          |          |          |     |          |          |          |          |          |     |          |          |          |          |          |     |          |          |          |          |          |      |          |          |          |          |          |      |          |          |          |          |          |      |          |          |          |          |          |      |          |          |          |          |          |      |          |          |          |          |          |      |          |          |          |          |          |      |          |          |          |          |          |      |          |          |          |          |          |      |          |          |          |          |          |      |          |          |          |          |          |      |          |          |          |          |          |      |          |          |          |          |          |      |          |          |          |          |          |      |          |          |          |          |          |      |          |          |          |          |          |      |          |          |          |          |          |      |          |          |          |          |          |      |          |          |          |          |          |      |          |          |          |          |          |  |   |   |   |   |    |     |          |  |  |  |  |     |          |          |  |  |  |     |          |          |          |  |  |     |          |          |          |          |  |      |          |          |          |          |          |      |          |          |          |          |          |      |          |          |          |          |          |      |          |          |          |          |          |      |          |          |          |          |          |      |          |          |          |          |          |      |          |          |          |          |          |      |          |          |          |          |          |      |          |          |          |          |          |      |          |          |          |          |          |
| 12 O                                                                                                          | 4.314946                                                                                                                                                                                                                                                                                                                                                                                                                                                                                                                                                                                                                                                                                                                                                                                                                                                                                                                                                                                                                                                                                                                                                                                                                                                                                                                                                                                                                                                                                                                                                                                                                                                                                                                                                                                                                                                                                                                                                                                                                                                                                                                                                                                                                                                                                                                                                                                                                                                                                                                                                                                                                                                                                                                                                                                                                                                                                                                                                                                                                                                                                                                                                                                                                                                                                                                                                                                                                                                                                                                                                                                                                                                                                                                                                                                                                                                                                                                                                                                                                                                                                                                                                                                                                                                                                                                                                                                                                                                                                                                                                                                                                                                                                                                                                                                                                                                                                                                                                                                                                                | 3.449299 | 4.124385 | 1.141894 | 4.915489 |          |          |      |          |    |    |  |  |      |          |          |  |  |  |      |          |          |          |  |  |      |          |          |          |          |  |     |          |          |          |          |          |     |          |          |          |          |          |     |          |          |          |          |          |     |          |          |          |          |          |     |          |          |          |          |          |      |          |          |          |          |          |      |          |          |          |          |          |      |          |          |          |          |          |      |          |          |          |          |          |      |          |          |          |          |          |      |          |          |          |          |          |      |          |          |          |          |          |      |          |          |          |          |          |      |          |          |          |          |          |      |          |          |          |          |          |      |          |          |          |          |          |      |          |          |          |          |          |      |          |          |          |          |          |      |          |          |          |          |          |      |          |          |          |          |          |      |          |          |          |          |          |      |          |          |          |          |          |      |          |          |          |          |          |      |          |          |          |          |          |  |   |   |   |   |    |     |          |  |  |  |  |     |          |          |  |  |  |     |          |          |          |  |  |     |          |          |          |          |  |      |          |          |          |          |          |      |          |          |          |          |          |      |          |          |          |          |          |      |          |          |          |          |          |      |          |          |          |          |          |      |          |          |          |          |          |      |          |          |          |          |          |      |          |          |          |          |          |      |          |          |          |          |          |      |          |          |          |          |          |
| 13 H                                                                                                          | 8.871384                                                                                                                                                                                                                                                                                                                                                                                                                                                                                                                                                                                                                                                                                                                                                                                                                                                                                                                                                                                                                                                                                                                                                                                                                                                                                                                                                                                                                                                                                                                                                                                                                                                                                                                                                                                                                                                                                                                                                                                                                                                                                                                                                                                                                                                                                                                                                                                                                                                                                                                                                                                                                                                                                                                                                                                                                                                                                                                                                                                                                                                                                                                                                                                                                                                                                                                                                                                                                                                                                                                                                                                                                                                                                                                                                                                                                                                                                                                                                                                                                                                                                                                                                                                                                                                                                                                                                                                                                                                                                                                                                                                                                                                                                                                                                                                                                                                                                                                                                                                                                                | 8.656408 | 9.722678 | 7.396191 | 7.228309 |          |          |      |          |    |    |  |  |      |          |          |  |  |  |      |          |          |          |  |  |      |          |          |          |          |  |     |          |          |          |          |          |     |          |          |          |          |          |     |          |          |          |          |          |     |          |          |          |          |          |     |          |          |          |          |          |      |          |          |          |          |          |      |          |          |          |          |          |      |          |          |          |          |          |      |          |          |          |          |          |      |          |          |          |          |          |      |          |          |          |          |          |      |          |          |          |          |          |      |          |          |          |          |          |      |          |          |          |          |          |      |          |          |          |          |          |      |          |          |          |          |          |      |          |          |          |          |          |      |          |          |          |          |          |      |          |          |          |          |          |      |          |          |          |          |          |      |          |          |          |          |          |      |          |          |          |          |          |      |          |          |          |          |          |      |          |          |          |          |          |  |   |   |   |   |    |     |          |  |  |  |  |     |          |          |  |  |  |     |          |          |          |  |  |     |          |          |          |          |  |      |          |          |          |          |          |      |          |          |          |          |          |      |          |          |          |          |          |      |          |          |          |          |          |      |          |          |          |          |          |      |          |          |          |          |          |      |          |          |          |          |          |      |          |          |          |          |          |      |          |          |          |          |          |      |          |          |          |          |          |
| 14 C                                                                                                          | 8.552939                                                                                                                                                                                                                                                                                                                                                                                                                                                                                                                                                                                                                                                                                                                                                                                                                                                                                                                                                                                                                                                                                                                                                                                                                                                                                                                                                                                                                                                                                                                                                                                                                                                                                                                                                                                                                                                                                                                                                                                                                                                                                                                                                                                                                                                                                                                                                                                                                                                                                                                                                                                                                                                                                                                                                                                                                                                                                                                                                                                                                                                                                                                                                                                                                                                                                                                                                                                                                                                                                                                                                                                                                                                                                                                                                                                                                                                                                                                                                                                                                                                                                                                                                                                                                                                                                                                                                                                                                                                                                                                                                                                                                                                                                                                                                                                                                                                                                                                                                                                                                                | 7.950750 | 8.975488 | 6.771064 | 6.672318 |          |          |      |          |    |    |  |  |      |          |          |  |  |  |      |          |          |          |  |  |      |          |          |          |          |  |     |          |          |          |          |          |     |          |          |          |          |          |     |          |          |          |          |          |     |          |          |          |          |          |     |          |          |          |          |          |      |          |          |          |          |          |      |          |          |          |          |          |      |          |          |          |          |          |      |          |          |          |          |          |      |          |          |          |          |          |      |          |          |          |          |          |      |          |          |          |          |          |      |          |          |          |          |          |      |          |          |          |          |          |      |          |          |          |          |          |      |          |          |          |          |          |      |          |          |          |          |          |      |          |          |          |          |          |      |          |          |          |          |          |      |          |          |          |          |          |      |          |          |          |          |          |      |          |          |          |          |          |      |          |          |          |          |          |      |          |          |          |          |          |  |   |   |   |   |    |     |          |  |  |  |  |     |          |          |  |  |  |     |          |          |          |  |  |     |          |          |          |          |  |      |          |          |          |          |          |      |          |          |          |          |          |      |          |          |          |          |          |      |          |          |          |          |          |      |          |          |          |          |          |      |          |          |          |          |          |      |          |          |          |          |          |      |          |          |          |          |          |      |          |          |          |          |          |      |          |          |          |          |          |
| 15 C                                                                                                          | 8.460367                                                                                                                                                                                                                                                                                                                                                                                                                                                                                                                                                                                                                                                                                                                                                                                                                                                                                                                                                                                                                                                                                                                                                                                                                                                                                                                                                                                                                                                                                                                                                                                                                                                                                                                                                                                                                                                                                                                                                                                                                                                                                                                                                                                                                                                                                                                                                                                                                                                                                                                                                                                                                                                                                                                                                                                                                                                                                                                                                                                                                                                                                                                                                                                                                                                                                                                                                                                                                                                                                                                                                                                                                                                                                                                                                                                                                                                                                                                                                                                                                                                                                                                                                                                                                                                                                                                                                                                                                                                                                                                                                                                                                                                                                                                                                                                                                                                                                                                                                                                                                                | 7.610930 | 8.593448 | 6.161897 | 6.794020 |          |          |      |          |    |    |  |  |      |          |          |  |  |  |      |          |          |          |  |  |      |          |          |          |          |  |     |          |          |          |          |          |     |          |          |          |          |          |     |          |          |          |          |          |     |          |          |          |          |          |     |          |          |          |          |          |      |          |          |          |          |          |      |          |          |          |          |          |      |          |          |          |          |          |      |          |          |          |          |          |      |          |          |          |          |          |      |          |          |          |          |          |      |          |          |          |          |          |      |          |          |          |          |          |      |          |          |          |          |          |      |          |          |          |          |          |      |          |          |          |          |          |      |          |          |          |          |          |      |          |          |          |          |          |      |          |          |          |          |          |      |          |          |          |          |          |      |          |          |          |          |          |      |          |          |          |          |          |      |          |          |          |          |          |      |          |          |          |          |          |  |   |   |   |   |    |     |          |  |  |  |  |     |          |          |  |  |  |     |          |          |          |  |  |     |          |          |          |          |  |      |          |          |          |          |          |      |          |          |          |          |          |      |          |          |          |          |          |      |          |          |          |          |          |      |          |          |          |          |          |      |          |          |          |          |          |      |          |          |          |          |          |      |          |          |          |          |          |      |          |          |          |          |          |      |          |          |          |          |          |
| 16 H                                                                                                          | 8.617018                                                                                                                                                                                                                                                                                                                                                                                                                                                                                                                                                                                                                                                                                                                                                                                                                                                                                                                                                                                                                                                                                                                                                                                                                                                                                                                                                                                                                                                                                                                                                                                                                                                                                                                                                                                                                                                                                                                                                                                                                                                                                                                                                                                                                                                                                                                                                                                                                                                                                                                                                                                                                                                                                                                                                                                                                                                                                                                                                                                                                                                                                                                                                                                                                                                                                                                                                                                                                                                                                                                                                                                                                                                                                                                                                                                                                                                                                                                                                                                                                                                                                                                                                                                                                                                                                                                                                                                                                                                                                                                                                                                                                                                                                                                                                                                                                                                                                                                                                                                                                                | 7.752844 | 8.701055 | 7.299170 | 6.015242 |          |          |      |          |    |    |  |  |      |          |          |  |  |  |      |          |          |          |  |  |      |          |          |          |          |  |     |          |          |          |          |          |     |          |          |          |          |          |     |          |          |          |          |          |     |          |          |          |          |          |     |          |          |          |          |          |      |          |          |          |          |          |      |          |          |          |          |          |      |          |          |          |          |          |      |          |          |          |          |          |      |          |          |          |          |          |      |          |          |          |          |          |      |          |          |          |          |          |      |          |          |          |          |          |      |          |          |          |          |          |      |          |          |          |          |          |      |          |          |          |          |          |      |          |          |          |          |          |      |          |          |          |          |          |      |          |          |          |          |          |      |          |          |          |          |          |      |          |          |          |          |          |      |          |          |          |          |          |      |          |          |          |          |          |      |          |          |          |          |          |  |   |   |   |   |    |     |          |  |  |  |  |     |          |          |  |  |  |     |          |          |          |  |  |     |          |          |          |          |  |      |          |          |          |          |          |      |          |          |          |          |          |      |          |          |          |          |          |      |          |          |          |          |          |      |          |          |          |          |          |      |          |          |          |          |          |      |          |          |          |          |          |      |          |          |          |          |          |      |          |          |          |          |          |      |          |          |          |          |          |
| 17 H                                                                                                          | 8.706244                                                                                                                                                                                                                                                                                                                                                                                                                                                                                                                                                                                                                                                                                                                                                                                                                                                                                                                                                                                                                                                                                                                                                                                                                                                                                                                                                                                                                                                                                                                                                                                                                                                                                                                                                                                                                                                                                                                                                                                                                                                                                                                                                                                                                                                                                                                                                                                                                                                                                                                                                                                                                                                                                                                                                                                                                                                                                                                                                                                                                                                                                                                                                                                                                                                                                                                                                                                                                                                                                                                                                                                                                                                                                                                                                                                                                                                                                                                                                                                                                                                                                                                                                                                                                                                                                                                                                                                                                                                                                                                                                                                                                                                                                                                                                                                                                                                                                                                                                                                                                                | 8.061552 | 9.049703 | 6.314473 | 7.441668 |          |          |      |          |    |    |  |  |      |          |          |  |  |  |      |          |          |          |  |  |      |          |          |          |          |  |     |          |          |          |          |          |     |          |          |          |          |          |     |          |          |          |          |          |     |          |          |          |          |          |     |          |          |          |          |          |      |          |          |          |          |          |      |          |          |          |          |          |      |          |          |          |          |          |      |          |          |          |          |          |      |          |          |          |          |          |      |          |          |          |          |          |      |          |          |          |          |          |      |          |          |          |          |          |      |          |          |          |          |          |      |          |          |          |          |          |      |          |          |          |          |          |      |          |          |          |          |          |      |          |          |          |          |          |      |          |          |          |          |          |      |          |          |          |          |          |      |          |          |          |          |          |      |          |          |          |          |          |      |          |          |          |          |          |      |          |          |          |          |          |  |   |   |   |   |    |     |          |  |  |  |  |     |          |          |  |  |  |     |          |          |          |  |  |     |          |          |          |          |  |      |          |          |          |          |          |      |          |          |          |          |          |      |          |          |          |          |          |      |          |          |          |          |          |      |          |          |          |          |          |      |          |          |          |          |          |      |          |          |          |          |          |      |          |          |          |          |          |      |          |          |          |          |          |      |          |          |          |          |          |
| 18 C                                                                                                          | 8.224372                                                                                                                                                                                                                                                                                                                                                                                                                                                                                                                                                                                                                                                                                                                                                                                                                                                                                                                                                                                                                                                                                                                                                                                                                                                                                                                                                                                                                                                                                                                                                                                                                                                                                                                                                                                                                                                                                                                                                                                                                                                                                                                                                                                                                                                                                                                                                                                                                                                                                                                                                                                                                                                                                                                                                                                                                                                                                                                                                                                                                                                                                                                                                                                                                                                                                                                                                                                                                                                                                                                                                                                                                                                                                                                                                                                                                                                                                                                                                                                                                                                                                                                                                                                                                                                                                                                                                                                                                                                                                                                                                                                                                                                                                                                                                                                                                                                                                                                                                                                                                                | 6.810656 | 7.700210 | 5.652651 | 6.186212 |          |          |      |          |    |    |  |  |      |          |          |  |  |  |      |          |          |          |  |  |      |          |          |          |          |  |     |          |          |          |          |          |     |          |          |          |          |          |     |          |          |          |          |          |     |          |          |          |          |          |     |          |          |          |          |          |      |          |          |          |          |          |      |          |          |          |          |          |      |          |          |          |          |          |      |          |          |          |          |          |      |          |          |          |          |          |      |          |          |          |          |          |      |          |          |          |          |          |      |          |          |          |          |          |      |          |          |          |          |          |      |          |          |          |          |          |      |          |          |          |          |          |      |          |          |          |          |          |      |          |          |          |          |          |      |          |          |          |          |          |      |          |          |          |          |          |      |          |          |          |          |          |      |          |          |          |          |          |      |          |          |          |          |          |      |          |          |          |          |          |  |   |   |   |   |    |     |          |  |  |  |  |     |          |          |  |  |  |     |          |          |          |  |  |     |          |          |          |          |  |      |          |          |          |          |          |      |          |          |          |          |          |      |          |          |          |          |          |      |          |          |          |          |          |      |          |          |          |          |          |      |          |          |          |          |          |      |          |          |          |          |          |      |          |          |          |          |          |      |          |          |          |          |          |      |          |          |          |          |          |
| 19 H                                                                                                          | 8.257309                                                                                                                                                                                                                                                                                                                                                                                                                                                                                                                                                                                                                                                                                                                                                                                                                                                                                                                                                                                                                                                                                                                                                                                                                                                                                                                                                                                                                                                                                                                                                                                                                                                                                                                                                                                                                                                                                                                                                                                                                                                                                                                                                                                                                                                                                                                                                                                                                                                                                                                                                                                                                                                                                                                                                                                                                                                                                                                                                                                                                                                                                                                                                                                                                                                                                                                                                                                                                                                                                                                                                                                                                                                                                                                                                                                                                                                                                                                                                                                                                                                                                                                                                                                                                                                                                                                                                                                                                                                                                                                                                                                                                                                                                                                                                                                                                                                                                                                                                                                                                                | 6.553555 | 7.356793 | 5.324542 | 6.347412 |          |          |      |          |    |    |  |  |      |          |          |  |  |  |      |          |          |          |  |  |      |          |          |          |          |  |     |          |          |          |          |          |     |          |          |          |          |          |     |          |          |          |          |          |     |          |          |          |          |          |     |          |          |          |          |          |      |          |          |          |          |          |      |          |          |          |          |          |      |          |          |          |          |          |      |          |          |          |          |          |      |          |          |          |          |          |      |          |          |          |          |          |      |          |          |          |          |          |      |          |          |          |          |          |      |          |          |          |          |          |      |          |          |          |          |          |      |          |          |          |          |          |      |          |          |          |          |          |      |          |          |          |          |          |      |          |          |          |          |          |      |          |          |          |          |          |      |          |          |          |          |          |      |          |          |          |          |          |      |          |          |          |          |          |      |          |          |          |          |          |  |   |   |   |   |    |     |          |  |  |  |  |     |          |          |  |  |  |     |          |          |          |  |  |     |          |          |          |          |  |      |          |          |          |          |          |      |          |          |          |          |          |      |          |          |          |          |          |      |          |          |          |          |          |      |          |          |          |          |          |      |          |          |          |          |          |      |          |          |          |          |          |      |          |          |          |          |          |      |          |          |          |          |          |      |          |          |          |          |          |

|  |    |   |          |          |          |          |          |
|--|----|---|----------|----------|----------|----------|----------|
|  | 20 | C | 8.186050 | 6.685884 | 7.561588 | 6.021918 | 5.648320 |
|  | 21 | H | 8.179323 | 6.301147 | 7.075271 | 6.032438 | 5.315190 |
|  | 22 | C | 8.413956 | 7.441795 | 8.403303 | 6.715366 | 6.002115 |
|  | 23 | S | 5.495207 | 5.236042 | 6.310045 | 3.355101 | 4.779910 |
|  | 24 | S | 5.494297 | 5.235378 | 6.308903 | 4.783219 | 3.351145 |
|  | 25 | C | 3.848923 | 4.253953 | 5.388781 | 2.724448 | 3.551768 |
|  | 26 | C | 3.848626 | 4.254004 | 5.388614 | 3.554122 | 2.722485 |
|  | 27 | H | 3.334766 | 4.456752 | 5.541819 | 4.087538 | 2.687850 |
|  | 28 | H | 3.336179 | 4.457380 | 5.542838 | 2.688524 | 4.086700 |
|  |    |   | 11       | 12       | 13       | 14       | 15       |
|  | 11 | O | 0.000000 |          |          |          |          |
|  | 12 | O | 6.051797 | 0.000000 |          |          |          |
|  | 13 | H | 7.629372 | 7.882794 | 0.000000 |          |          |
|  | 14 | C | 7.113774 | 7.261538 | 1.080765 | 0.000000 |          |
|  | 15 | C | 7.414670 | 6.469347 | 2.235598 | 1.424854 | 0.000000 |
|  | 16 | H | 6.112346 | 8.046613 | 2.687975 | 2.233497 | 3.349954 |
|  | 17 | H | 8.154390 | 6.453449 | 2.690166 | 2.236744 | 1.080137 |
|  | 18 | C | 6.800295 | 6.009992 | 3.335615 | 2.293241 | 1.414448 |
|  | 19 | H | 7.056832 | 5.537758 | 4.346001 | 3.337840 | 2.229715 |
|  | 20 | C | 6.051742 | 6.603511 | 3.333307 | 2.290335 | 2.299286 |
|  | 21 | H | 5.624898 | 6.684105 | 4.343073 | 3.334433 | 3.339520 |
|  | 22 | C | 6.291484 | 7.356187 | 2.232156 | 1.420447 | 2.306909 |
|  | 23 | S | 5.700571 | 3.731495 | 4.186253 | 3.704662 | 3.154378 |
|  | 24 | S | 3.725699 | 5.704774 | 3.946513 | 3.562568 | 4.082677 |
|  | 25 | C | 4.501967 | 3.456591 | 5.203920 | 4.844073 | 4.657900 |
|  | 26 | C | 3.453863 | 4.504731 | 5.118859 | 4.795702 | 4.970205 |
|  | 27 | H | 3.238495 | 5.067855 | 5.869324 | 5.667755 | 5.970074 |
|  | 28 | H | 5.066833 | 3.239633 | 6.003412 | 5.741684 | 5.492069 |
|  |    |   | 16       | 17       | 18       | 19       | 20       |
|  | 16 | H | 0.000000 |          |          |          |          |
|  | 17 | H | 4.357707 | 0.000000 |          |          |          |
|  | 18 | C | 3.347160 | 2.229562 | 0.000000 |          |          |
|  | 19 | H | 4.353050 | 2.689820 | 1.080137 | 0.000000 |          |
|  | 20 | C | 2.230861 | 3.343848 | 1.427043 | 2.235791 | 0.000000 |
|  | 21 | H | 2.690699 | 4.349190 | 2.234913 | 2.683766 | 1.080381 |
|  | 22 | C | 1.080152 | 3.349162 | 2.303118 | 3.343801 | 1.416475 |
|  | 23 | S | 4.872962 | 3.229360 | 3.264369 | 3.424122 | 3.868653 |
|  | 24 | S | 3.141481 | 4.806915 | 3.980723 | 4.635952 | 3.385237 |
|  | 25 | C | 5.444057 | 4.876819 | 4.646846 | 4.849363 | 4.841249 |
|  | 26 | C | 4.839161 | 5.427704 | 4.890464 | 5.281223 | 4.675990 |
|  | 27 | H | 5.528237 | 6.414022 | 5.943616 | 6.360211 | 5.637019 |
|  | 28 | H | 6.471586 | 5.549759 | 5.576157 | 5.699582 | 5.885289 |
|  |    |   | 21       | 22       | 23       | 24       | 25       |
|  | 21 | H | 0.000000 |          |          |          |          |
|  | 22 | C | 2.231540 | 0.000000 |          |          |          |
|  | 23 | S | 4.449066 | 4.124560 | 0.000000 |          |          |
|  | 24 | S | 3.634165 | 3.109790 | 3.076450 | 0.000000 |          |
|  | 25 | C | 5.189466 | 4.981246 | 1.742219 | 2.697554 | 0.000000 |
|  | 26 | C | 4.896783 | 4.639061 | 2.697137 | 1.742153 | 1.378361 |
|  | 27 | H | 5.806106 | 5.482722 | 3.684136 | 2.419630 | 2.152498 |

|                                                                                   |                                                                                                                                                                                                                                                                                                                                                                                                                                                                                                                                                                                                                                                                                                                                                                                                                                                                                                                                                                                                                                                                                                                                                                                                                                                                                                                                                                                                                                                                                                                                                                                                                                                                                                                                                                                                                                                                                                                                                                                                                                                                                                                                                                                                 |
|-----------------------------------------------------------------------------------|-------------------------------------------------------------------------------------------------------------------------------------------------------------------------------------------------------------------------------------------------------------------------------------------------------------------------------------------------------------------------------------------------------------------------------------------------------------------------------------------------------------------------------------------------------------------------------------------------------------------------------------------------------------------------------------------------------------------------------------------------------------------------------------------------------------------------------------------------------------------------------------------------------------------------------------------------------------------------------------------------------------------------------------------------------------------------------------------------------------------------------------------------------------------------------------------------------------------------------------------------------------------------------------------------------------------------------------------------------------------------------------------------------------------------------------------------------------------------------------------------------------------------------------------------------------------------------------------------------------------------------------------------------------------------------------------------------------------------------------------------------------------------------------------------------------------------------------------------------------------------------------------------------------------------------------------------------------------------------------------------------------------------------------------------------------------------------------------------------------------------------------------------------------------------------------------------|
|                                                                                   | 28 H 6.251701 6.004095 2.419484 3.684538 1.083892<br>26 27 28                                                                                                                                                                                                                                                                                                                                                                                                                                                                                                                                                                                                                                                                                                                                                                                                                                                                                                                                                                                                                                                                                                                                                                                                                                                                                                                                                                                                                                                                                                                                                                                                                                                                                                                                                                                                                                                                                                                                                                                                                                                                                                                                   |
|                                                                                   | 26 C 0.000000                                                                                                                                                                                                                                                                                                                                                                                                                                                                                                                                                                                                                                                                                                                                                                                                                                                                                                                                                                                                                                                                                                                                                                                                                                                                                                                                                                                                                                                                                                                                                                                                                                                                                                                                                                                                                                                                                                                                                                                                                                                                                                                                                                                   |
|                                                                                   | 27 H 1.083927 0.000000                                                                                                                                                                                                                                                                                                                                                                                                                                                                                                                                                                                                                                                                                                                                                                                                                                                                                                                                                                                                                                                                                                                                                                                                                                                                                                                                                                                                                                                                                                                                                                                                                                                                                                                                                                                                                                                                                                                                                                                                                                                                                                                                                                          |
|                                                                                   | 28 H 2.152725 2.509412 0.000000                                                                                                                                                                                                                                                                                                                                                                                                                                                                                                                                                                                                                                                                                                                                                                                                                                                                                                                                                                                                                                                                                                                                                                                                                                                                                                                                                                                                                                                                                                                                                                                                                                                                                                                                                                                                                                                                                                                                                                                                                                                                                                                                                                 |
| 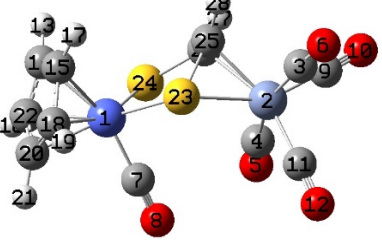 |                                                                                                                                                                                                                                                                                                                                                                                                                                                                                                                                                                                                                                                                                                                                                                                                                                                                                                                                                                                                                                                                                                                                                                                                                                                                                                                                                                                                                                                                                                                                                                                                                                                                                                                                                                                                                                                                                                                                                                                                                                                                                                                                                                                                 |
| 3. -4059.621753 +17.2                                                             | 1 2 3 4 5<br>1 Co 0.000000<br>2 Cr 3.968902 0.000000<br>3 C 5.102950 1.873714 0.000000<br>4 C 4.092734 1.878775 3.706495 0.000000<br>5 O 4.660623 3.018483 4.821544 1.143581 0.000000<br>6 O 6.034714 3.016256 1.145033 4.827533 5.926599<br>7 C 1.759041 3.740634 5.199441 3.285859 3.616062<br>8 O 2.890906 4.034438 5.576189 3.224334 3.310079<br>9 C 5.562859 1.821774 2.465510 2.468558 3.289283<br>10 O 6.616843 2.971352 3.330965 3.345087 3.926437<br>11 C 4.892295 1.854679 2.507054 2.528842 3.397179<br>12 O 5.658787 2.999255 3.389625 3.404051 4.058537<br>13 H 2.826319 5.824703 6.716329 6.028365 6.511923<br>14 C 2.089989 5.611635 6.516665 5.829016 6.337167<br>15 C 2.088810 5.345855 5.928342 5.936682 6.628992<br>16 H 2.808248 6.456215 7.789998 6.011716 6.131339<br>17 H 2.832327 5.339777 5.595292 6.236228 7.053614<br>18 C 2.054937 5.529478 6.203051 5.971414 6.594965<br>19 H 2.812136 5.723541 6.172517 6.338211 7.030719<br>20 C 2.058243 5.923348 6.948081 5.916341 6.307968<br>21 H 2.802206 6.407869 7.512071 6.216523 6.488203<br>22 C 2.050968 5.938777 7.098062 5.788914 6.101302<br>23 S 2.245383 2.463496 3.009546 3.568875 4.557466<br>24 S 2.238732 3.496348 5.002905 3.092813 3.459772<br>25 C 3.111706 2.078070 2.615496 3.315616 4.333962<br>26 C 3.117564 2.251372 3.485087 2.637975 3.435517<br>27 H 4.099428 2.885136 3.939148 3.127694 3.769774<br>28 H 3.979457 2.782291 2.621652 4.233810 5.270371<br>6 7 8 9 10<br>6 O 0.000000<br>7 C 6.239687 0.000000<br>8 O 6.631669 1.132052 0.000000<br>9 C 3.298319 5.314548 5.478784 0.000000<br>10 O 3.923047 6.376278 6.497386 1.150292 0.000000<br>11 C 3.379871 4.125428 3.993707 2.822976 3.798302<br>12 O 4.049250 4.686464 4.341170 3.802543 4.649688<br>13 H 7.495747 4.413056 5.492762 6.997232 7.836504<br>14 C 7.314044 3.717713 4.812920 7.000192 7.943503<br>15 C 6.599396 3.764956 4.870041 6.895183 7.912068<br>16 H 8.751837 3.513174 4.295358 7.791753 8.709308<br>17 H 6.115531 4.496670 5.595844 6.807740 7.787355<br>18 C 6.911726 3.236660 4.204284 7.246439 8.340399<br>19 H 6.774267 3.672842 4.497242 7.504628 8.628726<br>20 C 7.795937 2.834047 3.694380 7.580696 8.650203 |

|  |    |   |          |          |          |          |          |
|--|----|---|----------|----------|----------|----------|----------|
|  | 21 | H | 8.384550 | 2.948823 | 3.518366 | 8.087398 | 9.170038 |
|  | 22 | C | 7.997646 | 3.141025 | 4.090864 | 7.403001 | 8.382702 |
|  | 23 | S | 3.846482 | 2.841321 | 3.651562 | 4.184343 | 5.294979 |
|  | 24 | S | 6.049213 | 2.705280 | 3.490844 | 4.492501 | 5.330326 |
|  | 25 | C | 3.475519 | 3.848345 | 4.637454 | 3.209396 | 4.158033 |
|  | 26 | C | 4.477026 | 3.604274 | 4.304266 | 3.019868 | 3.858956 |
|  | 27 | H | 4.831737 | 4.590299 | 5.224989 | 2.994975 | 3.541174 |
|  | 28 | H | 3.168463 | 4.885134 | 5.696175 | 3.543168 | 4.328923 |
|  |    |   | 11       | 12       | 13       | 14       | 15       |
|  | 11 | C | 0.000000 |          |          |          |          |
|  | 12 | O | 1.145339 | 0.000000 |          |          |          |
|  | 13 | H | 7.241992 | 8.177009 | 0.000000 |          |          |
|  | 14 | C | 6.819189 | 7.661614 | 1.079386 | 0.000000 |          |
|  | 15 | C | 6.386168 | 7.158503 | 2.218652 | 1.405416 | 0.000000 |
|  | 16 | H | 7.418538 | 8.132355 | 2.691887 | 2.240168 | 3.337350 |
|  | 17 | H | 6.458700 | 7.268905 | 2.674139 | 2.219281 | 1.079847 |
|  | 18 | C | 6.181740 | 6.766650 | 3.339871 | 2.297129 | 1.428937 |
|  | 19 | H | 6.117464 | 6.568253 | 4.348301 | 3.339509 | 2.242350 |
|  | 20 | C | 6.544450 | 7.101345 | 3.338005 | 2.296349 | 2.294600 |
|  | 21 | H | 6.772054 | 7.182659 | 4.349406 | 3.341723 | 3.340467 |
|  | 22 | C | 6.891851 | 7.610179 | 2.233920 | 1.426329 | 2.294682 |
|  | 23 | S | 3.375696 | 4.228115 | 4.255495 | 3.762264 | 3.097945 |
|  | 24 | S | 4.897399 | 5.869990 | 3.078726 | 3.106266 | 3.741759 |
|  | 25 | C | 3.749710 | 4.837746 | 4.160837 | 4.118378 | 3.839394 |
|  | 26 | C | 4.020377 | 5.134979 | 3.997267 | 4.109352 | 4.286505 |
|  | 27 | H | 4.695866 | 5.827888 | 4.458861 | 4.794687 | 5.113774 |
|  | 28 | H | 4.395411 | 5.462389 | 4.556137 | 4.639940 | 4.246098 |
|  |    |   | 16       | 17       | 18       | 19       | 20       |
|  | 16 | H | 0.000000 |          |          |          |          |
|  | 17 | H | 4.346944 | 0.000000 |          |          |          |
|  | 18 | C | 3.344383 | 2.237000 | 0.000000 |          |          |
|  | 19 | H | 4.355921 | 2.694583 | 1.080033 | 0.000000 |          |
|  | 20 | C | 2.237084 | 3.336536 | 1.415981 | 2.232569 | 0.000000 |
|  | 21 | H | 2.692844 | 4.348479 | 2.228043 | 2.688290 | 1.081341 |
|  | 22 | C | 1.080019 | 3.338131 | 2.300427 | 3.344991 | 1.421029 |
|  | 23 | S | 5.035464 | 3.083767 | 3.224320 | 3.360420 | 3.959311 |
|  | 24 | S | 3.420137 | 4.222723 | 4.218784 | 5.024708 | 3.987323 |
|  | 25 | C | 5.515878 | 3.629486 | 4.483969 | 4.860175 | 5.084785 |
|  | 26 | C | 5.054143 | 4.347633 | 4.919174 | 5.498791 | 5.148017 |
|  | 27 | H | 5.704287 | 5.099009 | 5.887115 | 6.513876 | 6.077575 |
|  | 28 | H | 6.296556 | 3.765755 | 5.064405 | 5.373929 | 5.836370 |
|  |    |   | 21       | 22       | 23       | 24       | 25       |
|  | 21 | H | 0.000000 |          |          |          |          |
|  | 22 | C | 2.232481 | 0.000000 |          |          |          |
|  | 23 | S | 4.600881 | 4.220453 | 0.000000 |          |          |
|  | 24 | S | 4.638552 | 3.260462 | 3.170311 | 0.000000 |          |
|  | 25 | C | 5.863167 | 4.866391 | 1.768414 | 2.774787 | 0.000000 |
|  | 26 | C | 5.868536 | 4.658609 | 2.643874 | 1.791181 | 1.392265 |
|  | 27 | H | 6.824765 | 5.423373 | 3.669328 | 2.405198 | 2.142231 |
|  | 28 | H | 6.686358 | 5.595947 | 2.495341 | 3.684406 | 1.082971 |



|      |          |          |          |
|------|----------|----------|----------|
|      | 26       | 27       | 28       |
| 26 C | 0.000000 |          |          |
| 27 H | 1.087223 | 0.000000 |          |
| 28 H | 2.208294 | 2.562787 | 0.000000 |

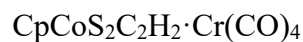

|                                                                                                              |          |          |          |          |          |          |
|--------------------------------------------------------------------------------------------------------------|----------|----------|----------|----------|----------|----------|
| 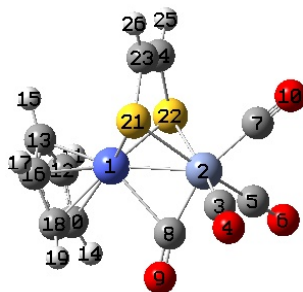 <p>1. -3946.410367 0.0</p> | 1        | 2        | 3        | 4        | 5        |          |
|                                                                                                              | 1 Co     | 0.000000 |          |          |          |          |
|                                                                                                              | 2 Cr     | 2.494986 | 0.000000 |          |          |          |
|                                                                                                              | 3 C      | 3.759426 | 1.833400 | 0.000000 |          |          |
|                                                                                                              | 4 O      | 4.730611 | 2.979437 | 1.146259 | 0.000000 |          |
|                                                                                                              | 5 C      | 3.750907 | 1.833599 | 2.772667 | 3.728532 | 0.000000 |
|                                                                                                              | 6 O      | 4.718971 | 2.979620 | 3.729445 | 4.541270 | 1.146270 |
|                                                                                                              | 7 C      | 4.104188 | 1.900336 | 2.535682 | 3.414324 | 2.543561 |
|                                                                                                              | 8 C      | 2.311415 | 1.842594 | 2.391249 | 3.249697 | 2.399150 |
|                                                                                                              | 9 O      | 3.110628 | 2.971014 | 3.119545 | 3.699678 | 3.133029 |
|                                                                                                              | 10 O     | 5.176565 | 3.037913 | 3.405851 | 4.071879 | 3.421842 |
|                                                                                                              | 11 H     | 2.782525 | 4.752339 | 6.309248 | 7.339652 | 5.254471 |
|                                                                                                              | 12 C     | 2.047231 | 4.333151 | 5.704894 | 6.664945 | 5.103897 |
|                                                                                                              | 13 C     | 2.021046 | 4.470424 | 5.687820 | 6.579601 | 5.673201 |
|                                                                                                              | 14 H     | 2.830797 | 4.332466 | 5.327717 | 6.141909 | 4.566658 |
|                                                                                                              | 15 H     | 2.770227 | 5.017985 | 6.306242 | 7.216206 | 6.290704 |
|                                                                                                              | 16 C     | 2.047919 | 4.339351 | 5.127792 | 5.843693 | 5.701437 |
|                                                                                                              | 17 H     | 2.783718 | 4.763207 | 5.287046 | 5.864398 | 6.312822 |
|                                                                                                              | 18 C     | 2.072474 | 4.086820 | 4.746955 | 5.423465 | 5.136816 |
|                                                                                                              | 19 H     | 2.831197 | 4.339398 | 4.587277 | 5.065701 | 5.331757 |
|                                                                                                              | 20 C     | 2.072575 | 4.083348 | 5.140932 | 5.984316 | 4.730285 |
|                                                                                                              | 21 S     | 2.225128 | 2.429805 | 3.116170 | 3.921242 | 4.243774 |
|                                                                                                              | 22 S     | 2.224699 | 2.428335 | 4.242830 | 5.381270 | 3.109886 |
|                                                                                                              | 23 C     | 3.056033 | 3.278180 | 4.414277 | 5.314626 | 4.813546 |
|                                                                                                              | 24 C     | 3.055931 | 3.277550 | 4.812048 | 5.853014 | 4.413191 |
|                                                                                                              | 25 H     | 4.034176 | 4.228919 | 5.786024 | 6.824929 | 5.136594 |
| 26 H                                                                                                         | 4.034498 | 4.229976 | 5.137818 | 5.914247 | 5.789167 |          |
|                                                                                                              | 6        | 7        | 8        | 9        | 10       |          |
| 6 O                                                                                                          | 0.000000 |          |          |          |          |          |
| 7 C                                                                                                          | 3.423919 | 0.000000 |          |          |          |          |
| 8 C                                                                                                          | 3.259466 | 3.686485 | 0.000000 |          |          |          |
| 9 O                                                                                                          | 3.718770 | 4.749015 | 1.158848 | 0.000000 |          |          |
| 10 O                                                                                                         | 4.093813 | 1.138077 | 4.805743 | 5.840657 | 0.000000 |          |
| 11 H                                                                                                         | 5.821018 | 6.150435 | 4.368123 | 4.785225 | 7.119389 |          |
| 12 C                                                                                                         | 5.811514 | 5.891847 | 3.777251 | 4.164371 | 6.924412 |          |
| 13 C                                                                                                         | 6.558106 | 5.881351 | 4.199831 | 4.734560 | 6.860987 |          |
| 14 H                                                                                                         | 5.038592 | 6.155053 | 2.964513 | 2.732363 | 7.269828 |          |
| 15 H                                                                                                         | 7.193040 | 6.168537 | 5.064048 | 5.711894 | 7.041123 |          |
| 16 C                                                                                                         | 6.656969 | 5.897221 | 3.778376 | 4.161457 | 6.926791 |          |
| 17 H                                                                                                         | 7.339683 | 6.160544 | 4.369729 | 4.779941 | 7.124193 |          |
| 18 C                                                                                                         | 5.976672 | 5.885895 | 2.963810 | 3.023783 | 6.995981 |          |
| 19 H                                                                                                         | 6.144429 | 6.160858 | 2.965546 | 2.726276 | 7.272292 |          |
| 20 C                                                                                                         | 5.400763 | 5.883142 | 2.963541 | 3.026802 | 6.995103 |          |

|  |    |   |          |          |          |          |          |
|--|----|---|----------|----------|----------|----------|----------|
|  | 21 | S | 5.381754 | 3.215682 | 3.300759 | 4.303615 | 4.072673 |
|  | 22 | S | 3.912615 | 3.211652 | 3.313299 | 4.321775 | 4.074127 |
|  | 23 | C | 5.854108 | 3.381020 | 4.550413 | 5.645381 | 3.943035 |
|  | 24 | C | 5.312435 | 3.379125 | 4.554346 | 5.651426 | 3.943500 |
|  | 25 | H | 5.911877 | 4.049037 | 5.543726 | 6.629521 | 4.393069 |
|  | 26 | H | 6.828200 | 4.052087 | 5.537680 | 6.619788 | 4.392197 |
|  |    |   | 11       | 12       | 13       | 14       | 15       |
|  | 11 | H | 0.000000 |          |          |          |          |
|  | 12 | C | 1.080227 | 0.000000 |          |          |          |
|  | 13 | C | 2.233268 | 1.424659 | 0.000000 |          |          |
|  | 14 | H | 2.680128 | 2.227297 | 3.346370 | 0.000000 |          |
|  | 15 | H | 2.695199 | 2.241422 | 1.079790 | 4.356309 | 0.000000 |
|  | 16 | C | 3.335428 | 2.291793 | 1.424169 | 3.335756 | 2.240569 |
|  | 17 | H | 4.345472 | 3.335640 | 2.233211 | 4.344135 | 2.694704 |
|  | 18 | C | 3.336564 | 2.293384 | 2.302343 | 2.236566 | 3.345531 |
|  | 19 | H | 4.344044 | 3.335441 | 3.346275 | 2.689717 | 4.356050 |
|  | 20 | C | 2.221929 | 1.411327 | 2.302541 | 1.079871 | 3.345873 |
|  | 21 | S | 4.761496 | 4.092114 | 3.424859 | 4.974439 | 3.663817 |
|  | 22 | S | 3.098013 | 3.136994 | 3.415751 | 4.090169 | 3.650160 |
|  | 23 | C | 4.778986 | 4.433880 | 3.736796 | 5.831182 | 3.516417 |
|  | 24 | C | 4.129183 | 4.074637 | 3.733272 | 5.518450 | 3.510357 |
|  | 25 | H | 4.582666 | 4.733686 | 4.436850 | 6.308634 | 4.025262 |
|  | 26 | H | 5.672131 | 5.320545 | 4.442725 | 6.830179 | 4.035555 |
|  |    |   | 16       | 17       | 18       | 19       | 20       |
|  | 16 | C | 0.000000 |          |          |          |          |
|  | 17 | H | 1.080204 | 0.000000 |          |          |          |
|  | 18 | C | 1.411485 | 2.221594 | 0.000000 |          |          |
|  | 19 | H | 2.227788 | 2.680105 | 1.079863 | 0.000000 |          |
|  | 20 | C | 2.293549 | 3.336527 | 1.425924 | 2.236215 | 0.000000 |
|  | 21 | S | 3.140609 | 3.102740 | 3.672995 | 4.082582 | 4.216215 |
|  | 22 | S | 4.087040 | 4.755527 | 4.217270 | 4.978317 | 3.676804 |
|  | 23 | C | 4.070310 | 4.121120 | 4.851619 | 5.511338 | 5.046374 |
|  | 24 | C | 4.426911 | 4.768247 | 5.043847 | 5.828297 | 4.856025 |
|  | 25 | H | 5.311416 | 5.658084 | 5.985485 | 6.827269 | 5.676211 |
|  | 26 | H | 4.729216 | 4.573225 | 5.670778 | 6.299089 | 5.988266 |
|  |    |   | 21       | 22       | 23       | 24       | 25       |
|  | 21 | S | 0.000000 |          |          |          |          |
|  | 22 | S | 2.998841 | 0.000000 |          |          |          |
|  | 23 | C | 1.775170 | 2.670712 | 0.000000 |          |          |
|  | 24 | C | 2.670882 | 1.774917 | 1.327972 | 0.000000 |          |
|  | 25 | H | 3.710789 | 2.466233 | 2.139688 | 1.083777 | 0.000000 |
|  | 26 | H | 2.466843 | 3.710508 | 1.083802 | 2.139463 | 2.562691 |
|  |    |   | 26       |          |          |          |          |
|  | 26 | H | 0.000000 |          |          |          |          |

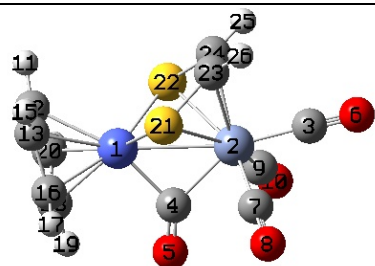

2. -3946.397991 +7.8

|      | 1        | 2        | 3        | 4        | 5        |
|------|----------|----------|----------|----------|----------|
| 1 Co | 0.000000 |          |          |          |          |
| 2 Cr | 2.713876 | 0.000000 |          |          |          |
| 3 C  | 4.519733 | 1.837361 | 0.000000 |          |          |
| 4 C  | 1.901924 | 2.044792 | 3.744422 | 0.000000 |          |
| 5 O  | 2.828376 | 3.041797 | 4.534513 | 1.171101 | 0.000000 |
| 6 O  | 5.657875 | 2.982644 | 1.145446 | 4.850486 | 5.562479 |
| 7 C  | 3.674584 | 1.834442 | 2.405933 | 2.468626 | 3.004733 |
| 8 O  | 4.535687 | 2.977294 | 3.283052 | 3.265507 | 3.508490 |
| 9 C  | 3.689021 | 1.835330 | 2.405889 | 2.474736 | 2.964224 |
| 10 O | 4.556949 | 2.977902 | 3.282304 | 3.269027 | 3.443695 |
| 11 H | 2.985041 | 5.270043 | 6.844522 | 4.794339 | 5.560576 |
| 12 C | 2.234115 | 4.807312 | 6.519178 | 4.006581 | 4.679484 |
| 13 C | 2.227666 | 4.788387 | 6.506583 | 3.934298 | 4.589885 |
| 14 H | 2.807478 | 4.891523 | 6.577653 | 3.713436 | 4.021346 |
| 15 H | 2.973506 | 5.233364 | 6.817469 | 4.676389 | 5.414704 |
| 16 C | 2.053380 | 4.502522 | 6.293879 | 3.152014 | 3.529134 |
| 17 H | 2.812669 | 4.856367 | 6.560647 | 3.489855 | 3.710566 |
| 18 C | 2.048537 | 4.455612 | 6.289373 | 2.784825 | 2.928755 |
| 19 H | 2.736484 | 4.671685 | 6.447811 | 2.729751 | 2.428186 |
| 20 C | 2.057947 | 4.532163 | 6.313044 | 3.291870 | 3.710334 |
| 21 S | 2.244450 | 2.470080 | 3.748614 | 2.969198 | 4.016457 |
| 22 S | 2.237670 | 2.470768 | 3.760829 | 2.964530 | 3.975992 |
| 23 C | 3.141721 | 2.193666 | 2.812579 | 3.686290 | 4.833152 |
| 24 C | 3.140286 | 2.197106 | 2.822802 | 3.686707 | 4.820708 |
| 25 H | 4.179307 | 2.929278 | 2.947342 | 4.593407 | 5.678270 |
| 26 H | 4.181686 | 2.922806 | 2.926403 | 4.591958 | 5.696570 |
|      | 6        | 7        | 8        | 9        | 10       |
| 6 O  | 0.000000 |          |          |          |          |
| 7 C  | 3.260309 | 0.000000 |          |          |          |
| 8 O  | 3.905038 | 1.143357 | 0.000000 |          |          |
| 9 C  | 3.272121 | 2.847483 | 3.821952 | 0.000000 |          |
| 10 O | 3.920295 | 3.813785 | 4.660100 | 1.142804 | 0.000000 |
| 11 H | 7.892972 | 6.549197 | 7.444097 | 6.075734 | 6.761170 |
| 12 C | 7.622005 | 5.887346 | 6.706785 | 5.626822 | 6.334697 |
| 13 C | 7.608972 | 5.493948 | 6.145554 | 5.915652 | 6.759745 |
| 14 H | 7.669079 | 6.069291 | 6.940325 | 4.929787 | 5.260536 |
| 15 H | 7.864608 | 5.852943 | 6.444047 | 6.579139 | 7.508219 |
| 16 C | 7.420714 | 4.850744 | 5.355941 | 5.471557 | 6.260060 |
| 17 H | 7.650077 | 4.800314 | 5.080049 | 5.918964 | 6.740474 |
| 18 C | 7.432618 | 5.014454 | 5.626994 | 4.950390 | 5.533110 |
| 19 H | 7.566427 | 5.008974 | 5.514421 | 4.866936 | 5.299243 |
| 20 C | 7.440899 | 5.556659 | 6.367220 | 4.938675 | 5.472575 |
| 21 S | 4.736644 | 2.950252 | 3.676314 | 4.226160 | 5.342053 |
| 22 S | 4.761517 | 4.220562 | 5.334311 | 2.972435 | 3.714800 |
| 23 C | 3.650032 | 3.293475 | 4.226864 | 3.848882 | 4.940787 |
| 24 C | 3.666836 | 3.848723 | 4.935720 | 3.305298 | 4.248769 |
| 25 H | 3.507879 | 4.547871 | 5.620994 | 3.678139 | 4.466477 |
| 26 H | 3.472494 | 3.665195 | 4.441777 | 4.539303 | 5.614996 |
|      | 11       | 12       | 13       | 14       | 15       |

|                                                                                     |                       |          |          |          |          |          |
|-------------------------------------------------------------------------------------|-----------------------|----------|----------|----------|----------|----------|
|                                                                                     | 11 H                  | 0.000000 |          |          |          |          |
|                                                                                     | 12 C                  | 1.080447 | 0.000000 |          |          |          |
|                                                                                     | 13 C                  | 2.200713 | 1.382677 | 0.000000 |          |          |
|                                                                                     | 14 H                  | 2.706561 | 2.252394 | 3.324327 | 0.000000 |          |
|                                                                                     | 15 H                  | 2.655874 | 2.199428 | 1.081128 | 4.337436 | 0.000000 |
|                                                                                     | 16 C                  | 3.337383 | 2.292056 | 1.441801 | 3.327054 | 2.245866 |
|                                                                                     | 17 H                  | 4.344320 | 3.332080 | 2.253869 | 4.339714 | 2.703697 |
|                                                                                     | 18 C                  | 3.350652 | 2.309784 | 2.305559 | 2.226171 | 3.346346 |
|                                                                                     | 19 H                  | 4.361601 | 3.354619 | 3.350824 | 2.682933 | 4.357554 |
|                                                                                     | 20 C                  | 2.250440 | 1.442587 | 2.283874 | 1.080742 | 3.330192 |
|                                                                                     | 21 S                  | 4.298117 | 3.815716 | 3.232425 | 5.002013 | 3.247407 |
|                                                                                     | 22 S                  | 3.391092 | 3.306872 | 3.945075 | 3.282420 | 4.512215 |
|                                                                                     | 23 C                  | 4.757193 | 4.600876 | 4.450174 | 5.529774 | 4.468109 |
|                                                                                     | 24 C                  | 4.427022 | 4.426227 | 4.691877 | 4.940568 | 4.919878 |
|                                                                                     | 25 H                  | 5.182007 | 5.324447 | 5.700354 | 5.696037 | 5.895600 |
|                                                                                     | 26 H                  | 5.692470 | 5.589427 | 5.336618 | 6.611091 | 5.200129 |
|                                                                                     |                       | 16       | 17       | 18       | 19       | 20       |
|                                                                                     | 16 C                  | 0.000000 |          |          |          |          |
|                                                                                     | 17 H                  | 1.080851 | 0.000000 |          |          |          |
|                                                                                     | 18 C                  | 1.416261 | 2.230352 | 0.000000 |          |          |
|                                                                                     | 19 H                  | 2.228321 | 2.687745 | 1.079237 | 0.000000 |          |
|                                                                                     | 20 C                  | 2.281724 | 3.327284 | 1.412745 | 2.225598 | 0.000000 |
|                                                                                     | 21 S                  | 3.302420 | 3.501721 | 4.016179 | 4.637622 | 4.204068 |
|                                                                                     | 22 S                  | 4.224242 | 5.045163 | 3.898799 | 4.444193 | 3.191592 |
|                                                                                     | 23 C                  | 4.757624 | 5.145374 | 5.175638 | 5.779302 | 4.987785 |
|                                                                                     | 24 C                  | 5.063777 | 5.673853 | 5.137103 | 5.714025 | 4.651330 |
|                                                                                     | 25 H                  | 6.128501 | 6.756767 | 6.132132 | 6.678090 | 5.542081 |
|                                                                                     | 26 H                  | 5.664239 | 5.935712 | 6.191488 | 6.779913 | 6.053126 |
|                                                                                     |                       | 21       | 22       | 23       | 24       | 25       |
|                                                                                     | 21 S                  | 0.000000 |          |          |          |          |
|                                                                                     | 22 S                  | 3.184379 | 0.000000 |          |          |          |
|                                                                                     | 23 C                  | 1.740585 | 2.723113 | 0.000000 |          |          |
|                                                                                     | 24 C                  | 2.724907 | 1.739671 | 1.379294 | 0.000000 |          |
|                                                                                     | 25 H                  | 3.733798 | 2.433189 | 2.155502 | 1.083796 | 0.000000 |
|                                                                                     | 26 H                  | 2.434209 | 3.731833 | 1.083937 | 2.154813 | 2.515737 |
|                                                                                     |                       | 26       |          |          |          |          |
|                                                                                     | 26 H                  | 0.000000 |          |          |          |          |
|                                                                                     |                       | 1        | 2        | 3        | 4        | 5        |
|                                                                                     | 1 Co                  | 0.000000 |          |          |          |          |
|                                                                                     | 2 Cr                  | 3.769841 | 0.000000 |          |          |          |
|                                                                                     | 3 C                   | 4.816718 | 1.840196 | 0.000000 |          |          |
|                                                                                     | 4 C                   | 5.173927 | 1.824791 | 2.722925 | 0.000000 |          |
|                                                                                     | 5 O                   | 6.151957 | 2.973593 | 3.681851 | 1.149567 | 0.000000 |
|                                                                                     | 6 O                   | 5.665080 | 2.987978 | 1.148018 | 3.674010 | 4.483260 |
|                                                                                     | 7 C                   | 3.257037 | 1.873252 | 2.510335 | 2.576053 | 3.462575 |
|                                                                                     | 8 O                   | 3.515271 | 3.016656 | 3.336546 | 3.473561 | 4.160521 |
|                                                                                     | 9 C                   | 5.192875 | 1.871527 | 2.480520 | 2.539715 | 3.434023 |
|                                                                                     | 10 O                  | 6.214097 | 3.016575 | 3.333723 | 3.412404 | 4.096596 |
|                                                                                     | 11 H                  | 2.766316 | 6.350475 | 7.337585 | 7.831414 | 8.806815 |
|                                                                                     | 12 C                  | 2.019799 | 5.729938 | 6.604594 | 7.192685 | 8.167875 |
| 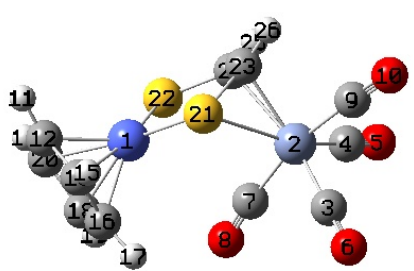 | 3. -3946.389313 +13.2 |          |          |          |          |          |

|  |    |   |          |          |          |          |          |  |  |  |
|--|----|---|----------|----------|----------|----------|----------|--|--|--|
|  | 13 | C | 2.038020 | 5.214995 | 5.736159 | 6.821644 | 7.870194 |  |  |  |
|  | 14 | H | 2.773870 | 6.237776 | 7.362817 | 7.253730 | 8.011162 |  |  |  |
|  | 15 | H | 2.791954 | 5.446822 | 5.792901 | 7.176128 | 8.278410 |  |  |  |
|  | 16 | C | 2.013757 | 4.747756 | 5.105859 | 6.181005 | 7.165990 |  |  |  |
|  | 17 | H | 2.760817 | 4.567822 | 4.540625 | 5.976662 | 6.962044 |  |  |  |
|  | 18 | C | 2.013034 | 5.064926 | 5.737192 | 6.219246 | 7.074379 |  |  |  |
|  | 19 | H | 2.748732 | 5.152400 | 5.773245 | 6.033272 | 6.766025 |  |  |  |
|  | 20 | C | 2.021275 | 5.660460 | 6.617218 | 6.860643 | 7.718111 |  |  |  |
|  | 21 | S | 2.179912 | 2.599497 | 3.570688 | 4.345662 | 5.461670 |  |  |  |
|  | 22 | S | 2.088774 | 3.502431 | 5.075330 | 4.274395 | 5.012044 |  |  |  |
|  | 23 | C | 3.093497 | 2.136128 | 3.751745 | 3.415773 | 4.402843 |  |  |  |
|  | 24 | C | 3.041396 | 2.384985 | 4.200465 | 3.093296 | 3.895371 |  |  |  |
|  | 25 | H | 4.054296 | 2.991611 | 4.820790 | 3.106576 | 3.634265 |  |  |  |
|  | 26 | H | 4.065469 | 2.754543 | 4.216367 | 3.830806 | 4.731880 |  |  |  |
|  |    |   | 6        | 7        | 8        | 9        | 10       |  |  |  |
|  | 6  | O | 0.000000 |          |          |          |          |  |  |  |
|  | 7  | C | 3.389872 | 0.000000 |          |          |          |  |  |  |
|  | 8  | O | 3.982452 | 1.146744 | 0.000000 |          |          |  |  |  |
|  | 9  | C | 3.351047 | 3.721989 | 4.850369 | 0.000000 |          |  |  |  |
|  | 10 | O | 3.974005 | 4.855461 | 5.974591 | 1.146493 | 0.000000 |  |  |  |
|  | 11 | H | 8.087696 | 6.017400 | 6.166331 | 7.447008 | 8.302534 |  |  |  |
|  | 12 | C | 7.316754 | 5.172002 | 5.214218 | 7.008697 | 7.946976 |  |  |  |
|  | 13 | C | 6.296665 | 4.675647 | 4.738059 | 6.460339 | 7.386623 |  |  |  |
|  | 14 | H | 8.186962 | 5.292789 | 5.074993 | 7.769037 | 8.803923 |  |  |  |
|  | 15 | H | 6.255079 | 5.192070 | 5.389799 | 6.441366 | 7.258472 |  |  |  |
|  | 16 | C | 5.614627 | 3.769144 | 3.578468 | 6.262116 | 7.291104 |  |  |  |
|  | 17 | H | 4.871886 | 3.527631 | 3.279090 | 6.062399 | 7.076860 |  |  |  |
|  | 18 | C | 6.382808 | 3.822972 | 3.431567 | 6.745569 | 7.836765 |  |  |  |
|  | 19 | H | 6.396355 | 3.618276 | 2.953860 | 6.953857 | 8.083953 |  |  |  |
|  | 20 | C | 7.373442 | 4.731294 | 4.547182 | 7.187625 | 8.223921 |  |  |  |
|  | 21 | S | 4.446412 | 3.219538 | 4.035067 | 3.415323 | 4.295183 |  |  |  |
|  | 22 | S | 6.128358 | 3.107398 | 3.492388 | 4.924326 | 5.948099 |  |  |  |
|  | 23 | C | 4.833447 | 3.300254 | 4.313088 | 2.634629 | 3.486502 |  |  |  |
|  | 24 | C | 5.339388 | 2.960584 | 3.823789 | 3.384801 | 4.325541 |  |  |  |
|  | 25 | H | 5.967099 | 3.661062 | 4.493731 | 3.672006 | 4.468628 |  |  |  |
|  | 26 | H | 5.241978 | 4.237401 | 5.305333 | 2.466367 | 2.993824 |  |  |  |
|  |    |   | 11       | 12       | 13       | 14       | 15       |  |  |  |
|  | 11 | H | 0.000000 |          |          |          |          |  |  |  |
|  | 12 | C | 1.080926 | 0.000000 |          |          |          |  |  |  |
|  | 13 | C | 2.229880 | 1.417605 | 0.000000 |          |          |  |  |  |
|  | 14 | H | 2.693001 | 2.239013 | 3.348031 | 0.000000 |          |  |  |  |
|  | 15 | H | 2.683972 | 2.229955 | 1.080295 | 4.356525 | 0.000000 |  |  |  |
|  | 16 | C | 3.334587 | 2.291307 | 1.417945 | 3.344656 | 2.232176 |  |  |  |
|  | 17 | H | 4.345255 | 3.336066 | 2.233901 | 4.351293 | 2.693362 |  |  |  |
|  | 18 | C | 3.336870 | 2.294216 | 2.302351 | 2.229887 | 3.346663 |  |  |  |
|  | 19 | H | 4.348054 | 3.339389 | 3.342655 | 2.691702 | 4.351941 |  |  |  |
|  | 20 | C | 2.236577 | 1.426010 | 2.305454 | 1.080103 | 3.348409 |  |  |  |
|  | 21 | S | 4.095767 | 3.672567 | 3.164232 | 4.897297 | 3.194496 |  |  |  |
|  | 22 | S | 4.171348 | 3.692426 | 4.106133 | 3.237680 | 4.849074 |  |  |  |
|  | 23 | C | 5.100999 | 4.803395 | 4.661431 | 5.454541 | 4.846602 |  |  |  |

|  |    |   |          |          |          |          |          |
|--|----|---|----------|----------|----------|----------|----------|
|  | 24 | C | 5.242005 | 4.863686 | 4.968013 | 4.915009 | 5.425070 |
|  | 25 | H | 6.108784 | 5.802834 | 6.015729 | 5.607131 | 6.487981 |
|  | 26 | H | 5.760245 | 5.608576 | 5.471476 | 6.371241 | 5.506533 |
|  |    |   | 16       | 17       | 18       | 19       | 20       |
|  | 16 | C | 0.000000 |          |          |          |          |
|  | 17 | H | 1.080654 | 0.000000 |          |          |          |
|  | 18 | C | 1.426837 | 2.235973 | 0.000000 |          |          |
|  | 19 | H | 2.233977 | 2.682608 | 1.080415 | 0.000000 |          |
|  | 20 | C | 2.300322 | 3.341605 | 1.415251 | 2.231617 | 0.000000 |
|  | 21 | S | 3.372605 | 3.580516 | 3.992842 | 4.614699 | 4.156435 |
|  | 22 | S | 3.863491 | 4.456654 | 3.273272 | 3.439362 | 3.152170 |
|  | 23 | C | 4.738795 | 4.990801 | 4.958718 | 5.361950 | 5.000143 |
|  | 24 | C | 4.812321 | 5.154932 | 4.638198 | 4.828355 | 4.674189 |
|  | 25 | H | 5.845492 | 6.188532 | 5.547754 | 5.632238 | 5.522760 |
|  | 26 | H | 5.694813 | 5.924761 | 5.990814 | 6.435035 | 5.943429 |
|  |    |   | 21       | 22       | 23       | 24       | 25       |
|  | 21 | S | 0.000000 |          |          |          |          |
|  | 22 | S | 3.084758 | 0.000000 |          |          |          |
|  | 23 | C | 1.746007 | 2.714848 | 0.000000 |          |          |
|  | 24 | C | 2.662115 | 1.756013 | 1.384329 | 0.000000 |          |
|  | 25 | H | 3.685872 | 2.417828 | 2.154323 | 1.085068 | 0.000000 |
|  | 26 | H | 2.453818 | 3.666836 | 1.082410 | 2.186642 | 2.560949 |
|  |    |   | 26       |          |          |          |          |
|  | 26 | H | 0.000000 |          |          |          |          |

CpCoS<sub>2</sub>C<sub>2</sub>H<sub>2</sub>·Cr(CO)<sub>3</sub>

|                                                                                                                |    |          |          |          |          |          |          |  |
|----------------------------------------------------------------------------------------------------------------|----|----------|----------|----------|----------|----------|----------|--|
| 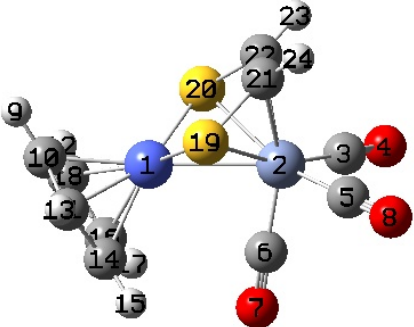 <p>1. -3833.185023 0.0</p> |    |          | 1        | 2        | 3        | 4        | 5        |  |
|                                                                                                                | 1  | Co       | 0.000000 |          |          |          |          |  |
|                                                                                                                | 2  | Cr       | 2.562463 | 0.000000 |          |          |          |  |
|                                                                                                                | 3  | C        | 4.053391 | 1.835264 | 0.000000 |          |          |  |
|                                                                                                                | 4  | O        | 5.105767 | 2.983222 | 1.148032 | 0.000000 |          |  |
|                                                                                                                | 5  | C        | 4.061029 | 1.835154 | 2.603084 | 3.507127 | 0.000000 |  |
|                                                                                                                | 6  | C        | 2.913631 | 1.823279 | 2.563593 | 3.475448 | 2.561326 |  |
|                                                                                                                | 7  | O        | 3.631511 | 2.977481 | 3.465293 | 4.181082 | 3.464229 |  |
|                                                                                                                | 8  | O        | 5.116185 | 2.982981 | 3.505622 | 4.216860 | 1.147899 |  |
|                                                                                                                | 9  | H        | 2.781834 | 5.242872 | 6.637045 | 7.609114 | 6.691512 |  |
|                                                                                                                | 10 | C        | 2.019854 | 4.579430 | 5.986184 | 6.973729 | 6.023054 |  |
|                                                                                                                | 11 | C        | 2.022371 | 4.339723 | 5.952089 | 7.021644 | 5.449171 |  |
|                                                                                                                | 12 | H        | 2.775782 | 4.761464 | 5.544708 | 6.271159 | 6.507954 |  |
|                                                                                                                | 13 | H        | 2.772848 | 4.826302 | 6.566049 | 7.680381 | 5.667728 |  |
|                                                                                                                | 14 | C        | 2.032047 | 3.879297 | 5.316365 | 6.328273 | 4.942727 |  |
|                                                                                                                | 15 | H        | 2.787995 | 4.019035 | 5.436848 | 6.439183 | 4.712701 |  |
|                                                                                                                | 16 | C        | 2.035636 | 3.856132 | 4.923993 | 5.800551 | 5.273640 |  |
|                                                                                                                | 17 | H        | 2.788437 | 3.969342 | 4.680433 | 5.413546 | 5.339593 |  |
|                                                                                                                | 18 | C        | 2.023147 | 4.300198 | 5.374816 | 6.238442 | 5.921928 |  |
|                                                                                                                | 19 | S        | 2.149640 | 2.392459 | 4.178527 | 5.310969 | 3.049610 |  |
|                                                                                                                | 20 | S        | 2.150014 | 2.393417 | 3.044610 | 3.863773 | 4.176595 |  |
|                                                                                                                | 21 | C        | 3.050451 | 2.162944 | 3.428172 | 4.421343 | 2.849679 |  |
| 22                                                                                                             | C  | 3.051196 | 2.164560 | 2.857271 | 3.705132 | 3.420596 |          |  |

|    |   |          |          |          |          |          |
|----|---|----------|----------|----------|----------|----------|
| 23 | H | 4.090726 | 2.934435 | 3.024373 | 3.584644 | 3.954861 |
| 24 | H | 4.089676 | 2.931693 | 3.965745 | 4.850241 | 3.011030 |
|    |   | 6        | 7        | 8        | 9        | 10       |
| 6  | C | 0.000000 |          |          |          |          |
| 7  | O | 1.154224 | 0.000000 |          |          |          |
| 8  | O | 3.471343 | 4.177813 | 0.000000 |          |          |
| 9  | H | 5.639209 | 6.169224 | 7.687217 | 0.000000 |          |
| 10 | C | 4.718019 | 5.156729 | 7.025837 | 1.079918 | 0.000000 |
| 11 | C | 4.235626 | 4.570350 | 6.326326 | 2.238196 | 1.422196 |
| 12 | H | 4.733124 | 5.072595 | 7.625158 | 2.695534 | 2.234409 |
| 13 | H | 4.852353 | 5.217847 | 6.418341 | 2.692709 | 2.232399 |
| 14 | C | 3.228697 | 3.315426 | 5.816945 | 3.349793 | 2.306206 |
| 15 | H | 3.054233 | 2.914767 | 5.436103 | 4.360105 | 3.349963 |
| 16 | C | 3.173375 | 3.243451 | 6.278643 | 3.349903 | 2.306328 |
| 17 | H | 2.935159 | 2.751178 | 6.324516 | 4.360613 | 3.350254 |
| 18 | C | 4.162570 | 4.482274 | 6.995514 | 2.240395 | 1.424197 |
| 19 | S | 3.440258 | 4.379099 | 3.872508 | 4.011911 | 3.596816 |
| 20 | S | 3.453722 | 4.394465 | 5.308423 | 3.915360 | 3.540008 |
| 21 | C | 3.878536 | 5.005585 | 3.698127 | 4.919950 | 4.664084 |
| 22 | C | 3.884821 | 5.012490 | 4.412251 | 4.885782 | 4.645264 |
| 23 | H | 4.649802 | 5.769662 | 4.835524 | 5.777119 | 5.614335 |
| 24 | H | 4.639625 | 5.758119 | 3.570307 | 5.830435 | 5.643099 |
|    |   | 11       | 12       | 13       | 14       | 15       |
| 11 | C | 0.000000 |          |          |          |          |
| 12 | H | 3.335971 | 0.000000 |          |          |          |
| 13 | H | 1.080769 | 4.346723 | 0.000000 |          |          |
| 14 | C | 1.418636 | 3.338968 | 2.229083 | 0.000000 |          |
| 15 | H | 2.234825 | 4.346911 | 2.688677 | 1.080147 | 0.000000 |
| 16 | C | 2.296200 | 2.227607 | 3.339607 | 1.422988 | 2.233774 |
| 17 | H | 3.337997 | 2.688136 | 4.346524 | 2.231948 | 2.683960 |
| 18 | C | 2.291627 | 1.080741 | 3.336089 | 2.295568 | 3.338153 |
| 19 | S | 3.108196 | 4.848694 | 3.121645 | 3.402191 | 3.662613 |
| 20 | S | 4.088188 | 3.106843 | 4.808751 | 4.044506 | 4.737925 |
| 21 | C | 4.577881 | 5.359502 | 4.742261 | 4.782788 | 5.115116 |
| 22 | C | 4.904689 | 4.758868 | 5.325777 | 4.998056 | 5.489668 |
| 23 | H | 5.966752 | 5.498397 | 6.392807 | 6.041995 | 6.526773 |
| 24 | H | 5.469547 | 6.433262 | 5.485267 | 5.713191 | 5.941951 |
|    |   | 16       | 17       | 18       | 19       | 20       |
| 16 | C | 0.000000 |          |          |          |          |
| 17 | H | 1.079893 | 0.000000 |          |          |          |
| 18 | C | 1.416950 | 2.233782 | 0.000000 |          |          |
| 19 | S | 4.012285 | 4.679921 | 4.111929 | 0.000000 |          |
| 20 | S | 3.459010 | 3.757238 | 3.098559 | 3.137567 | 0.000000 |
| 21 | C | 4.994150 | 5.476913 | 4.922359 | 1.741448 | 2.711082 |
| 22 | C | 4.809790 | 5.156392 | 4.585555 | 2.712063 | 1.741365 |
| 23 | H | 5.749255 | 6.000868 | 5.475176 | 3.726152 | 2.440125 |
| 24 | H | 6.030727 | 6.500949 | 5.987921 | 2.439470 | 3.725252 |
|    |   | 21       | 22       | 23       | 24       |          |
| 21 | C | 0.000000 |          |          |          |          |
| 22 | C | 1.376904 | 0.000000 |          |          |          |

|  |      |          |          |          |          |
|--|------|----------|----------|----------|----------|
|  | 23 H | 2.157132 | 1.083340 | 0.000000 |          |
|  | 24 H | 1.083261 | 2.156941 | 2.526877 | 0.000000 |

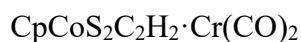

|                                                                                                              |          |          |          |          |          |          |  |
|--------------------------------------------------------------------------------------------------------------|----------|----------|----------|----------|----------|----------|--|
| 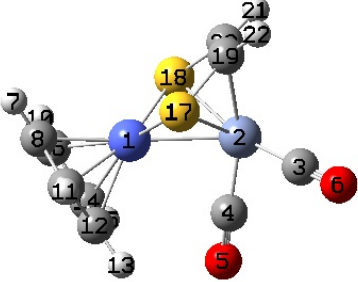 <p>1. -3719.897911 0.0</p> |          | 1        | 2        | 3        | 4        | 5        |  |
|                                                                                                              | 1 Co     | 0.000000 |          |          |          |          |  |
|                                                                                                              | 2 Cr     | 2.462855 | 0.000000 |          |          |          |  |
|                                                                                                              | 3 C      | 3.966064 | 1.834330 | 0.000000 |          |          |  |
|                                                                                                              | 4 C      | 2.833798 | 1.816106 | 2.538704 | 0.000000 |          |  |
|                                                                                                              | 5 O      | 3.581148 | 2.971783 | 3.439584 | 1.155909 | 0.000000 |  |
|                                                                                                              | 6 O      | 5.030428 | 2.984049 | 1.149916 | 3.450722 | 4.151770 |  |
|                                                                                                              | 7 H      | 2.806044 | 5.156207 | 6.540201 | 5.580242 | 6.140877 |  |
|                                                                                                              | 8 C      | 2.039906 | 4.494735 | 5.890606 | 4.658648 | 5.128293 |  |
|                                                                                                              | 9 C      | 2.019020 | 4.172224 | 5.225893 | 4.068864 | 4.434862 |  |
|                                                                                                              | 10 H     | 2.776405 | 4.806326 | 6.537110 | 4.835518 | 5.206770 |  |
|                                                                                                              | 11 H     | 2.772963 | 4.610128 | 5.360183 | 4.625512 | 5.018385 |  |
|                                                                                                              | 12 C     | 2.039312 | 3.777437 | 4.821063 | 3.105150 | 3.208688 |  |
|                                                                                                              | 13 H     | 2.790094 | 3.897489 | 4.572465 | 2.869094 | 2.719316 |  |
|                                                                                                              | 14 C     | 2.032246 | 3.844717 | 5.263561 | 3.196384 | 3.295566 |  |
|                                                                                                              | 15 H     | 2.793947 | 4.041361 | 5.437082 | 3.072252 | 2.924116 |  |
|                                                                                                              | 16 C     | 2.028519 | 4.295104 | 5.896297 | 4.201725 | 4.552554 |  |
|                                                                                                              | 17 S     | 2.153549 | 2.331046 | 3.045167 | 3.505614 | 4.495670 |  |
|                                                                                                              | 18 S     | 2.202582 | 2.355441 | 4.161251 | 3.313957 | 4.227774 |  |
|                                                                                                              | 19 C     | 3.049464 | 2.169682 | 2.967797 | 3.925464 | 5.069213 |  |
|                                                                                                              | 20 C     | 3.047735 | 2.134234 | 3.462598 | 3.811409 | 4.928998 |  |
|                                                                                                              | 21 H     | 4.093886 | 2.904794 | 3.984412 | 4.542183 | 5.635625 |  |
| 22 H                                                                                                         | 4.091358 | 2.957715 | 3.190088 | 4.718833 | 5.860061 |          |  |
|                                                                                                              |          | 6        | 7        | 8        | 9        | 10       |  |
| 6 O                                                                                                          | 0.000000 |          |          |          |          |          |  |
| 7 H                                                                                                          | 7.517072 | 0.000000 |          |          |          |          |  |
| 8 C                                                                                                          | 6.883019 | 1.079888 | 0.000000 |          |          |          |  |
| 9 C                                                                                                          | 6.094333 | 2.242918 | 1.426533 | 0.000000 |          |          |  |
| 10 H                                                                                                         | 7.653048 | 2.685673 | 2.224615 | 3.329492 | 0.000000 |          |  |
| 11 H                                                                                                         | 6.088371 | 2.698816 | 2.236926 | 1.080989 | 4.340241 |          |  |
| 12 C                                                                                                         | 5.699514 | 3.355347 | 2.311808 | 1.418981 | 3.338266 |          |  |
| 13 H                                                                                                         | 5.303406 | 4.365317 | 3.355242 | 2.234111 | 4.347669 |          |  |
| 14 C                                                                                                         | 6.275568 | 3.354553 | 2.310222 | 2.293688 | 2.233622 |          |  |
| 15 H                                                                                                         | 6.435456 | 4.364283 | 3.353261 | 3.337156 | 2.694748 |          |  |
| 16 C                                                                                                         | 6.968211 | 2.233138 | 1.415209 | 2.284798 | 1.080955 |          |  |
| 17 S                                                                                                         | 3.894829 | 3.830762 | 3.496430 | 3.100299 | 4.757257 |          |  |
| 18 S                                                                                                         | 5.300655 | 4.166661 | 3.705861 | 4.173783 | 3.154651 |          |  |
| 19 C                                                                                                         | 3.843669 | 4.839217 | 4.619390 | 4.588490 | 5.262453 |          |  |
| 20 C                                                                                                         | 4.473157 | 4.965211 | 4.688145 | 4.931887 | 4.712740 |          |  |
| 21 H                                                                                                         | 4.882445 | 5.918657 | 5.694951 | 6.007065 | 5.486857 |          |  |
| 22 H                                                                                                         | 3.799910 | 5.715536 | 5.583058 | 5.483941 | 6.321204 |          |  |
|                                                                                                              |          | 11       | 12       | 13       | 14       | 15       |  |
| 11 H                                                                                                         | 0.000000 |          |          |          |          |          |  |
| 12 C                                                                                                         | 2.228818 | 0.000000 |          |          |          |          |  |
| 13 H                                                                                                         | 2.686397 | 1.080110 | 0.000000 |          |          |          |  |



|  |    |   |          |          |          |          |          |  |
|--|----|---|----------|----------|----------|----------|----------|--|
|  | 14 | C | 3.336749 | 1.419466 | 2.230671 | 0.000000 |          |  |
|  | 15 | H | 4.345770 | 2.231624 | 2.685291 | 1.079963 | 0.000000 |  |
|  | 16 | C | 3.329338 | 2.295431 | 3.339249 | 1.424987 | 2.241734 |  |
|  | 17 | S | 3.107903 | 3.539487 | 3.884835 | 4.087379 | 4.810304 |  |
|  | 18 | S | 4.929834 | 4.016749 | 4.661744 | 3.372399 | 3.587015 |  |
|  | 19 | C | 4.773840 | 4.856737 | 5.237676 | 5.009570 | 5.522172 |  |
|  | 20 | C | 5.386687 | 4.994282 | 5.478633 | 4.755952 | 5.082109 |  |
|  | 21 | H | 6.469669 | 6.023347 | 6.481785 | 5.684994 | 5.896580 |  |
|  | 22 | H | 5.520625 | 5.811007 | 6.106944 | 6.062471 | 6.572156 |  |
|  |    |   | 16       | 17       | 18       | 19       | 20       |  |
|  | 16 | C | 0.000000 |          |          |          |          |  |
|  | 17 | S | 4.060995 | 0.000000 |          |          |          |  |
|  | 18 | S | 3.149351 | 3.195586 | 0.000000 |          |          |  |
|  | 19 | C | 4.869375 | 1.741166 | 2.745024 | 0.000000 |          |  |
|  | 20 | C | 4.562507 | 2.712591 | 1.749997 | 1.377387 | 0.000000 |  |
|  | 21 | H | 5.476348 | 3.719518 | 2.442032 | 2.145434 | 1.085344 |  |
|  | 22 | H | 5.929065 | 2.443753 | 3.750379 | 1.083723 | 2.152828 |  |
|  |    |   | 21       | 22       |          |          |          |  |
|  | 21 | H | 0.000000 |          |          |          |          |  |
|  | 22 | H | 2.499388 | 0.000000 |          |          |          |  |

**Table S3A.** Energy rank for all of the  $\text{CpCoS}_2\text{C}_2\text{H}_2\cdot\text{Fe}(\text{CO})_n$  optimized structures. PBE0/6-311G(d,p).

Co-Fe

|     | name                                         | E (a.u.)     | $\Delta E$<br>(kcal/mol) |
|-----|----------------------------------------------|--------------|--------------------------|
| 4-1 | 8-Co-fe-CO-4-md2-r1-freq                     | -4165.599957 | 0.0                      |
| 4-2 | 7-ir-fe-CO-4-md1-new-Fe-Co-h-r-ok            | -4165.597863 | 1.3                      |
| 4-3 | 7-Co-fe-CO-4-md1-r1-freq                     | -4165.596538 | 2.1                      |
| 4-4 | 9-Co-fe-CO-4-md3-r1                          | -4165.595131 | 3.0                      |
| 4-5 | 7-rh-fe-CO-4-md1-r1-freq-new-Co-Fe-g-freq-ok | -4165.550276 | 31.2                     |
|     |                                              |              |                          |
|     | name                                         |              |                          |
| 3-1 | 5-Co-fe-CO-3-md2-r1                          | -4052.376675 | 0.0                      |
| 3-2 | 4-Co-fe-CO-3-md1-r1                          | -4052.369928 | 4.2                      |
| 3-3 | 6-Co-fe-CO-3-md3-r1-freq                     | -4052.353831 | 14.3                     |
|     |                                              |              |                          |
|     | name                                         |              |                          |
| 2-1 | 2-Co-fe-CO-2-md2-r1                          | -3939.121968 | 0.0                      |
| 2-2 | 3-Co-fe-CO-2-md3-r1-freq                     | -3939.111699 | 6.4                      |

**Table S3B.** Distance table for the lowest-lying CpCoS<sub>2</sub>C<sub>2</sub>H<sub>2</sub>·Fe(CO)<sub>n</sub> structures after PBE0/6-311G(d,p) optimization.

CpCoS<sub>2</sub>C<sub>2</sub>H<sub>2</sub>·Fe(CO)<sub>4</sub>

|                            |          |          |          |          |          |          |  |  |
|----------------------------|----------|----------|----------|----------|----------|----------|--|--|
| <p>1. -4165.599957 0.0</p> |          | 1        | 2        | 3        | 4        | 5        |  |  |
|                            | 1 Co     | 0.000000 |          |          |          |          |  |  |
|                            | 2 Fe     | 2.558980 | 0.000000 |          |          |          |  |  |
|                            | 3 C      | 3.219222 | 1.807621 | 0.000000 |          |          |  |  |
|                            | 4 C      | 3.090459 | 1.789142 | 3.595674 | 0.000000 |          |  |  |
|                            | 5 O      | 3.863848 | 2.928474 | 4.734141 | 1.139564 | 0.000000 |  |  |
|                            | 6 O      | 4.103693 | 2.935427 | 1.134309 | 4.719628 | 5.855960 |  |  |
|                            | 7 C      | 2.908157 | 1.756588 | 2.511299 | 2.561640 | 3.489373 |  |  |
|                            | 8 O      | 3.655405 | 2.901422 | 3.408700 | 3.472173 | 4.220270 |  |  |
|                            | 9 C      | 4.272033 | 1.757562 | 2.480797 | 2.491301 | 3.380526 |  |  |
|                            | 10 O     | 5.409316 | 2.897747 | 3.367598 | 3.384797 | 4.071561 |  |  |
|                            | 11 H     | 2.761444 | 5.063918 | 5.761900 | 5.008798 | 5.317416 |  |  |
|                            | 12 C     | 2.009555 | 4.400319 | 5.200499 | 4.326548 | 4.674478 |  |  |
|                            | 13 C     | 2.026705 | 4.508666 | 4.996422 | 4.780531 | 5.295791 |  |  |
|                            | 14 H     | 2.807136 | 4.011526 | 5.451302 | 3.056125 | 2.915871 |  |  |
|                            | 15 H     | 2.764901 | 5.221342 | 5.382526 | 5.725532 | 6.317828 |  |  |
|                            | 16 C     | 2.044818 | 3.960353 | 4.636035 | 4.127880 | 4.633497 |  |  |
|                            | 17 H     | 2.816422 | 4.328893 | 4.774248 | 4.682245 | 5.247823 |  |  |
|                            | 18 C     | 2.068968 | 3.484030 | 4.678343 | 3.072314 | 3.352145 |  |  |
|                            | 19 H     | 2.849453 | 3.467205 | 4.849660 | 2.747036 | 2.861788 |  |  |
|                            | 20 C     | 2.047709 | 3.789696 | 5.025961 | 3.230314 | 3.381587 |  |  |
|                            | 21 S     | 2.216432 | 3.627672 | 3.030124 | 4.888999 | 5.849703 |  |  |
|                            | 22 S     | 2.172253 | 2.315520 | 3.030114 | 2.827474 | 3.608935 |  |  |
|                            | 23 C     | 3.075116 | 3.815794 | 3.069442 | 5.117523 | 6.082096 |  |  |
|                            | 24 C     | 3.093650 | 3.368593 | 3.075143 | 4.426092 | 5.308778 |  |  |
|                            | 25 H     | 4.121343 | 4.094590 | 3.772845 | 5.047452 | 5.858179 |  |  |
| 26 H                       | 4.113181 | 4.778035 | 3.758494 | 6.161621 | 7.141271 |          |  |  |
|                            |          | 6        | 7        | 8        | 9        | 10       |  |  |
| 6 O                        | 0.000000 |          |          |          |          |          |  |  |
| 7 C                        | 3.414560 | 0.000000 |          |          |          |          |  |  |
| 8 O                        | 4.118217 | 1.146022 | 0.000000 |          |          |          |  |  |
| 9 C                        | 3.297070 | 2.951192 | 3.934339 | 0.000000 |          |          |  |  |
| 10 O                       | 3.955204 | 3.923775 | 4.787485 | 1.141998 | 0.000000 |          |  |  |
| 11 H                       | 6.534912 | 5.587914 | 6.231287 | 6.592309 | 7.664250 |          |  |  |
| 12 C                       | 6.036973 | 4.681343 | 5.240139 | 6.029177 | 7.136042 |          |  |  |
| 13 C                       | 5.702172 | 4.342406 | 4.668495 | 6.253864 | 7.394872 |          |  |  |
| 14 H                       | 6.508319 | 4.520447 | 5.190629 | 5.286282 | 6.257569 |          |  |  |
| 15 H                       | 5.909426 | 5.029699 | 5.292794 | 6.956656 | 8.094626 |          |  |  |
| 16 C                       | 5.427618 | 3.338186 | 3.455142 | 5.687757 | 6.807801 |          |  |  |
| 17 H                       | 5.441919 | 3.300956 | 3.084110 | 5.996508 | 7.082207 |          |  |  |
| 18 C                       | 5.663342 | 3.108706 | 3.421041 | 5.081459 | 6.157663 |          |  |  |
| 19 H                       | 5.876542 | 2.839702 | 3.003095 | 4.857763 | 5.848320 |          |  |  |

|  |    |   |          |          |          |          |          |
|--|----|---|----------|----------|----------|----------|----------|
|  | 20 | C | 6.026988 | 4.030088 | 4.603886 | 5.312258 | 6.376111 |
|  | 21 | S | 3.310702 | 3.950592 | 4.575993 | 5.092745 | 6.141046 |
|  | 22 | S | 3.917456 | 3.769583 | 4.848999 | 3.363948 | 4.340234 |
|  | 23 | C | 3.214170 | 4.774780 | 5.643882 | 4.867436 | 5.773263 |
|  | 24 | C | 3.490518 | 4.732453 | 5.761538 | 4.182686 | 5.027229 |
|  | 25 | H | 4.058153 | 5.609263 | 6.678927 | 4.539250 | 5.198821 |
|  | 26 | H | 3.591022 | 5.686686 | 6.500938 | 5.672268 | 6.483083 |
|  |    |   | 11       | 12       | 13       | 14       | 15       |
|  | 11 | H | 0.000000 |          |          |          |          |
|  | 12 | C | 1.079604 | 0.000000 |          |          |          |
|  | 13 | C | 2.233111 | 1.418991 | 0.000000 |          |          |
|  | 14 | H | 2.701365 | 2.238888 | 3.338887 | 0.000000 |          |
|  | 15 | H | 2.682460 | 2.226298 | 1.079566 | 4.347557 | 0.000000 |
|  | 16 | C | 3.347046 | 2.304756 | 1.418208 | 3.344602 | 2.227820 |
|  | 17 | H | 4.357828 | 3.349125 | 2.236130 | 4.353090 | 2.690924 |
|  | 18 | C | 3.340034 | 2.296089 | 2.288641 | 2.225462 | 3.332186 |
|  | 19 | H | 4.351172 | 3.340235 | 3.331727 | 2.679805 | 4.341713 |
|  | 20 | C | 2.242107 | 1.426533 | 2.294328 | 1.080294 | 3.336698 |
|  | 21 | S | 3.790818 | 3.443285 | 2.933169 | 4.900476 | 2.830645 |
|  | 22 | S | 3.531732 | 3.334832 | 3.978768 | 3.224241 | 4.600972 |
|  | 23 | C | 4.235815 | 4.219284 | 4.222326 | 5.317400 | 4.206840 |
|  | 24 | C | 4.169413 | 4.214892 | 4.604876 | 4.770296 | 4.857112 |
|  | 25 | H | 4.914891 | 5.101539 | 5.619070 | 5.464235 | 5.856438 |
|  | 26 | H | 5.042585 | 5.132223 | 5.050105 | 6.360366 | 4.847745 |
|  |    |   | 16       | 17       | 18       | 19       | 20       |
|  | 16 | C | 0.000000 |          |          |          |          |
|  | 17 | H | 1.080015 | 0.000000 |          |          |          |
|  | 18 | C | 1.423235 | 2.237627 | 0.000000 |          |          |
|  | 19 | H | 2.231405 | 2.688796 | 1.079888 | 0.000000 |          |
|  | 20 | C | 2.301400 | 3.344134 | 1.411848 | 2.224231 | 0.000000 |
|  | 21 | S | 3.377905 | 3.689453 | 4.086742 | 4.859407 | 4.120902 |
|  | 22 | S | 4.175520 | 4.946285 | 3.736192 | 4.232232 | 3.173484 |
|  | 23 | C | 4.787395 | 5.265267 | 5.143230 | 5.866741 | 4.828358 |
|  | 24 | C | 5.080504 | 5.717648 | 5.060540 | 5.686120 | 4.545635 |
|  | 25 | H | 6.131372 | 6.792305 | 6.018517 | 6.601278 | 5.395455 |
|  | 26 | H | 5.696574 | 6.092059 | 6.171234 | 6.912416 | 5.859814 |
|  |    |   | 21       | 22       | 23       | 24       | 25       |
|  | 21 | S | 0.000000 |          |          |          |          |
|  | 22 | S | 3.138444 | 0.000000 |          |          |          |
|  | 23 | C | 1.724628 | 2.679885 | 0.000000 |          |          |
|  | 24 | C | 2.698757 | 1.750639 | 1.342806 | 0.000000 |          |
|  | 25 | H | 3.717797 | 2.434555 | 2.146224 | 1.083302 | 0.000000 |
|  | 26 | H | 2.408400 | 3.697638 | 1.086132 | 2.119605 | 2.512078 |
|  |    |   | 26       |          |          |          |          |
|  | 26 | H | 0.000000 |          |          |          |          |

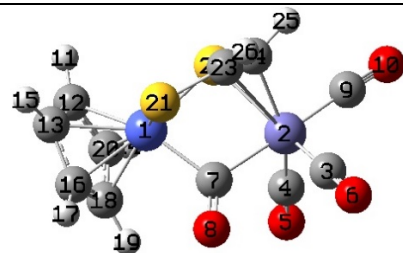

2. -4165.597863 +1.3

|      | 1        | 2        | 3        | 4        | 5        |
|------|----------|----------|----------|----------|----------|
| 1 Co | 0.000000 |          |          |          |          |
| 2 Fe | 3.134660 | 0.000000 |          |          |          |
| 3 C  | 4.293185 | 1.768062 | 0.000000 |          |          |
| 4 C  | 3.733293 | 1.769122 | 2.709417 | 0.000000 |          |
| 5 O  | 4.456415 | 2.909365 | 3.667634 | 1.140379 | 0.000000 |
| 6 O  | 5.196212 | 2.905274 | 1.137936 | 3.666826 | 4.484969 |
| 7 C  | 1.925407 | 2.002938 | 2.636320 | 2.500000 | 3.321741 |
| 8 O  | 2.774257 | 2.902574 | 2.919586 | 3.032743 | 3.616984 |
| 9 C  | 4.694412 | 1.819376 | 2.642412 | 2.658220 | 3.574667 |
| 10 O | 5.755987 | 2.955799 | 3.568658 | 3.562812 | 4.303425 |
| 11 H | 2.885144 | 5.380899 | 6.896758 | 5.747415 | 6.229785 |
| 12 C | 2.133610 | 4.930990 | 6.327069 | 5.190858 | 5.642075 |
| 13 C | 2.132620 | 5.264465 | 6.361974 | 5.686239 | 6.208546 |
| 14 H | 2.807101 | 4.325536 | 5.852107 | 3.857817 | 3.951309 |
| 15 H | 2.885697 | 5.957010 | 6.961175 | 6.585631 | 7.189109 |
| 16 C | 2.045480 | 4.911071 | 5.769018 | 5.089243 | 5.508027 |
| 17 H | 2.795066 | 5.395198 | 5.951004 | 5.615388 | 6.035436 |
| 18 C | 2.061920 | 4.375690 | 5.410857 | 4.124199 | 4.348411 |
| 19 H | 2.782975 | 4.385211 | 5.220007 | 3.787695 | 3.808986 |
| 20 C | 2.049456 | 4.311956 | 5.709837 | 4.133598 | 4.397131 |
| 21 S | 2.195001 | 3.722488 | 4.217901 | 4.981976 | 5.933352 |
| 22 S | 2.242037 | 2.271341 | 3.901576 | 3.263142 | 4.173180 |
| 23 C | 2.974324 | 2.971967 | 3.413560 | 4.610653 | 5.707918 |
| 24 C | 3.013667 | 2.097603 | 3.063471 | 3.772769 | 4.883971 |
| 25 H | 4.058167 | 2.702782 | 3.492369 | 4.365614 | 5.468352 |
| 26 H | 4.029485 | 3.717055 | 3.753568 | 5.426252 | 6.546249 |
|      | 6        | 7        | 8        | 9        | 10       |
| 6 O  | 0.000000 |          |          |          |          |
| 7 C  | 3.461295 | 0.000000 |          |          |          |
| 8 O  | 3.420431 | 1.183096 | 0.000000 |          |          |
| 9 C  | 3.577469 | 3.820521 | 4.677281 | 0.000000 |          |
| 10 O | 4.342628 | 4.955962 | 5.794174 | 1.137267 | 0.000000 |
| 11 H | 7.906742 | 4.720655 | 5.567495 | 6.410656 | 7.226932 |
| 12 C | 7.287914 | 3.944387 | 4.664583 | 6.203805 | 7.129081 |
| 13 C | 7.179156 | 3.870802 | 4.352425 | 6.760230 | 7.776376 |
| 14 H | 6.886546 | 3.735096 | 4.431954 | 5.398206 | 6.238406 |
| 15 H | 7.717721 | 4.605859 | 5.064746 | 7.410893 | 8.408903 |
| 16 C | 6.486135 | 3.160977 | 3.308801 | 6.596985 | 7.685023 |
| 17 H | 6.503837 | 3.475312 | 3.291792 | 7.163744 | 8.283732 |
| 18 C | 6.230876 | 2.822989 | 3.052997 | 5.978366 | 7.028438 |
| 19 H | 5.957665 | 2.817471 | 2.732669 | 5.999577 | 7.046589 |
| 20 C | 6.685424 | 3.307835 | 3.943063 | 5.637314 | 6.584023 |
| 21 S | 4.820908 | 2.736383 | 3.310657 | 5.166555 | 6.193672 |
| 22 S | 4.989666 | 2.807108 | 3.988908 | 3.048359 | 3.920376 |
| 23 C | 4.063199 | 2.988611 | 3.796616 | 3.986315 | 4.895689 |
| 24 C | 3.970657 | 2.930239 | 3.974025 | 2.752449 | 3.626206 |
| 25 H | 4.309629 | 3.937249 | 4.952115 | 2.623758 | 3.203028 |
| 26 H | 4.157466 | 3.878456 | 4.529899 | 4.478701 | 5.263595 |
|      | 11       | 12       | 13       | 14       | 15       |

|                                                                                                                 |                                                   |   |   |   |   |   |
|-----------------------------------------------------------------------------------------------------------------|---------------------------------------------------|---|---|---|---|---|
|                                                                                                                 | 11 H 0.000000                                     |   |   |   |   |   |
|                                                                                                                 | 12 C 1.080431 0.000000                            |   |   |   |   |   |
|                                                                                                                 | 13 C 2.214080 1.396831 0.000000                   |   |   |   |   |   |
|                                                                                                                 | 14 H 2.703304 2.247482 3.331365 0.000000          |   |   |   |   |   |
|                                                                                                                 | 15 H 2.669549 2.211672 1.080974 4.344286 0.000000 |   |   |   |   |   |
|                                                                                                                 | 16 C 3.340542 2.294898 1.434637 3.330471 2.243554 |   |   |   |   |   |
|                                                                                                                 | 17 H 4.349478 3.337069 2.249156 4.339971 2.704071 |   |   |   |   |   |
|                                                                                                                 | 18 C 3.350059 2.308203 2.304493 2.227031 3.346998 |   |   |   |   |   |
|                                                                                                                 | 19 H 4.362332 3.353871 3.347993 2.687951 4.356072 |   |   |   |   |   |
|                                                                                                                 | 20 C 2.247412 1.436873 2.289277 1.080830 3.335716 |   |   |   |   |   |
|                                                                                                                 | 21 S 4.333351 3.816025 3.216091 4.986372 3.275163 |   |   |   |   |   |
|                                                                                                                 | 22 S 3.429940 3.322617 3.973619 3.276775 4.566880 |   |   |   |   |   |
|                                                                                                                 | 23 C 5.012213 4.707708 4.516715 5.458212 4.666160 |   |   |   |   |   |
|                                                                                                                 | 24 C 4.809276 4.626257 4.845402 4.895309 5.207359 |   |   |   |   |   |
|                                                                                                                 | 25 H 5.536746 5.504742 5.815017 5.704112 6.114707 |   |   |   |   |   |
|                                                                                                                 | 26 H 5.993697 5.730773 5.441809 6.546139 5.456578 |   |   |   |   |   |
|                                                                                                                 | 16 C 0.000000                                     |   |   |   |   |   |
|                                                                                                                 | 17 H 1.080007 0.000000                            |   |   |   |   |   |
|                                                                                                                 | 18 C 1.416924 2.228417 0.000000                   |   |   |   |   |   |
|                                                                                                                 | 19 H 2.226460 2.679140 1.079786 0.000000          |   |   |   |   |   |
|                                                                                                                 | 20 C 2.285402 3.328615 1.413419 2.229472 0.000000 |   |   |   |   |   |
|                                                                                                                 | 21 S 3.261284 3.407720 3.951670 4.547849 4.193357 |   |   |   |   |   |
|                                                                                                                 | 22 S 4.244929 5.035521 3.883336 4.409506 3.207738 |   |   |   |   |   |
|                                                                                                                 | 23 C 4.624402 4.908826 4.952295 5.433987 4.933599 |   |   |   |   |   |
|                                                                                                                 | 24 C 4.986543 5.494704 4.936511 5.360389 4.641129 |   |   |   |   |   |
|                                                                                                                 | 25 H 6.049228 6.570632 5.969666 6.383266 5.562262 |   |   |   |   |   |
|                                                                                                                 | 26 H 5.548098 5.704793 5.972788 6.417913 6.013086 |   |   |   |   |   |
|                                                                                                                 | 21 S 0.000000                                     |   |   |   |   |   |
|                                                                                                                 | 22 S 3.229348 0.000000                            |   |   |   |   |   |
|                                                                                                                 | 23 C 1.660733 2.744183 0.000000                   |   |   |   |   |   |
|                                                                                                                 | 24 C 2.717727 1.768010 1.409114 0.000000          |   |   |   |   |   |
|                                                                                                                 | 25 H 3.646299 2.445870 2.120957 1.085900 0.000000 |   |   |   |   |   |
|                                                                                                                 | 26 H 2.366646 3.731431 1.088640 2.151007 2.422016 |   |   |   |   |   |
|                                                                                                                 | 26 H 0.000000                                     |   |   |   |   |   |
|                                                                                                                 |                                                   | 1 | 2 | 3 | 4 | 5 |
|                                                                                                                 | 1 Co 0.000000                                     |   |   |   |   |   |
|                                                                                                                 | 2 Fe 2.800884 0.000000                            |   |   |   |   |   |
|                                                                                                                 | 3 C 4.233815 1.842121 0.000000                    |   |   |   |   |   |
|                                                                                                                 | 4 C 1.862526 1.974210 3.806916 0.000000           |   |   |   |   |   |
|                                                                                                                 | 5 O 2.803777 2.915323 4.743156 1.181738 0.000000  |   |   |   |   |   |
|                                                                                                                 | 6 O 5.273000 2.974654 1.134324 4.940742 5.864774  |   |   |   |   |   |
|                                                                                                                 | 7 C 3.894500 1.763692 2.694411 2.607743 3.044351  |   |   |   |   |   |
|                                                                                                                 | 8 O 4.794428 2.900277 3.624073 3.444000 3.598381  |   |   |   |   |   |
|                                                                                                                 | 9 C 3.902674 1.764700 2.706145 2.617095 3.054633  |   |   |   |   |   |
|                                                                                                                 | 10 O 4.806337 2.901235 3.641026 3.453347 3.607908 |   |   |   |   |   |
|                                                                                                                 | 11 H 2.910827 5.246366 6.146670 4.645535 5.453321 |   |   |   |   |   |
|                                                                                                                 | 12 C 2.160545 4.808005 5.961394 3.899741 4.616805 |   |   |   |   |   |
| 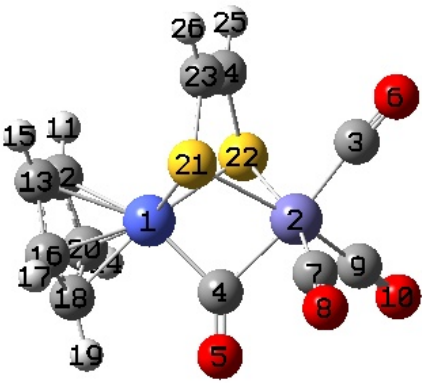 <p>3. -4165.596538 +2.1</p> |                                                   |   |   |   |   |   |

|  |    |   |          |          |          |          |          |  |  |
|--|----|---|----------|----------|----------|----------|----------|--|--|
|  | 13 | C | 2.160401 | 4.805960 | 5.957375 | 3.894505 | 4.609317 |  |  |
|  | 14 | H | 2.785871 | 4.910022 | 6.348340 | 3.605924 | 3.905981 |  |  |
|  | 15 | H | 2.910866 | 5.243075 | 6.139536 | 4.637320 | 5.441318 |  |  |
|  | 16 | C | 2.039908 | 4.575295 | 6.030019 | 3.219964 | 3.647569 |  |  |
|  | 17 | H | 2.787832 | 4.906426 | 6.338877 | 3.591158 | 3.881200 |  |  |
|  | 18 | C | 2.046463 | 4.523772 | 6.166747 | 2.830152 | 3.002332 |  |  |
|  | 19 | H | 2.742203 | 4.733232 | 6.505601 | 2.816025 | 2.543729 |  |  |
|  | 20 | C | 2.039377 | 4.578349 | 6.036257 | 3.229577 | 3.662251 |  |  |
|  | 21 | S | 2.293880 | 2.377233 | 3.071698 | 2.839781 | 3.889999 |  |  |
|  | 22 | S | 2.293841 | 2.378229 | 3.094406 | 2.837505 | 3.886703 |  |  |
|  | 23 | C | 3.027187 | 3.134997 | 3.058250 | 4.026672 | 5.195295 |  |  |
|  | 24 | C | 3.027360 | 3.135101 | 3.067939 | 4.025883 | 5.194096 |  |  |
|  | 25 | H | 3.977677 | 4.088242 | 3.728419 | 5.032136 | 6.181360 |  |  |
|  | 26 | H | 3.977779 | 4.088015 | 3.712720 | 5.033576 | 6.183561 |  |  |
|  |    |   | 6        | 7        | 8        | 9        | 10       |  |  |
|  | 6  | O | 0.000000 |          |          |          |          |  |  |
|  | 7  | C | 3.594774 | 0.000000 |          |          |          |  |  |
|  | 8  | O | 4.357242 | 1.137008 | 0.000000 |          |          |  |  |
|  | 9  | C | 3.631108 | 2.595869 | 3.531436 | 0.000000 |          |  |  |
|  | 10 | O | 4.410107 | 3.526499 | 4.299518 | 1.136889 | 0.000000 |  |  |
|  | 11 | H | 6.945480 | 6.658629 | 7.628043 | 6.132621 | 6.861832 |  |  |
|  | 12 | C | 6.869432 | 6.042957 | 6.938974 | 5.750198 | 6.516011 |  |  |
|  | 13 | C | 6.858206 | 5.732580 | 6.488393 | 6.051665 | 6.953739 |  |  |
|  | 14 | H | 7.359372 | 6.145481 | 7.045873 | 5.156564 | 5.579633 |  |  |
|  | 15 | H | 6.924524 | 6.109996 | 6.825586 | 6.665981 | 7.641665 |  |  |
|  | 16 | C | 7.041214 | 5.161422 | 5.767385 | 5.715539 | 6.576496 |  |  |
|  | 17 | H | 7.328779 | 5.136259 | 5.547917 | 6.142907 | 7.041632 |  |  |
|  | 18 | C | 7.248511 | 5.243985 | 5.918233 | 5.250728 | 5.927412 |  |  |
|  | 19 | H | 7.625731 | 5.209630 | 5.761998 | 5.212398 | 5.763879 |  |  |
|  | 20 | C | 7.058961 | 5.713125 | 6.572442 | 5.178421 | 5.792787 |  |  |
|  | 21 | S | 3.912486 | 3.009108 | 3.792979 | 4.117485 | 5.243237 |  |  |
|  | 22 | S | 3.964994 | 4.115998 | 5.241018 | 3.010844 | 3.800613 |  |  |
|  | 23 | C | 3.580685 | 4.295354 | 5.213239 | 4.676960 | 5.735501 |  |  |
|  | 24 | C | 3.605533 | 4.678973 | 5.734914 | 4.292475 | 5.214713 |  |  |
|  | 25 | H | 4.018347 | 5.664021 | 6.725241 | 5.044562 | 5.856907 |  |  |
|  | 26 | H | 3.974994 | 5.049177 | 5.856770 | 5.660771 | 6.724014 |  |  |
|  |    |   | 11       | 12       | 13       | 14       | 15       |  |  |
|  | 11 | H | 0.000000 |          |          |          |          |  |  |
|  | 12 | C | 1.080507 | 0.000000 |          |          |          |  |  |
|  | 13 | C | 2.206530 | 1.389330 | 0.000000 |          |          |  |  |
|  | 14 | H | 2.700986 | 2.249265 | 3.329644 | 0.000000 |          |  |  |
|  | 15 | H | 2.664260 | 2.206677 | 1.080567 | 4.342118 | 0.000000 |  |  |
|  | 16 | C | 3.336016 | 2.290042 | 1.439078 | 3.327695 | 2.245865 |  |  |
|  | 17 | H | 4.342590 | 3.330392 | 2.249364 | 4.339934 | 2.700244 |  |  |
|  | 18 | C | 3.348740 | 2.307789 | 2.307321 | 2.229204 | 3.348150 |  |  |
|  | 19 | H | 4.358799 | 3.352246 | 3.351731 | 2.685918 | 4.358055 |  |  |
|  | 20 | C | 2.246531 | 1.439163 | 2.289276 | 1.080244 | 3.335478 |  |  |
|  | 21 | S | 4.407836 | 3.915162 | 3.336177 | 5.052321 | 3.373481 |  |  |
|  | 22 | S | 3.385814 | 3.343646 | 3.927370 | 3.508142 | 4.427785 |  |  |
|  | 23 | C | 3.958458 | 3.924346 | 3.691433 | 5.314162 | 3.502942 |  |  |

|                                                                                     |                                                   |
|-------------------------------------------------------------------------------------|---------------------------------------------------|
|                                                                                     | 24 C 3.491927 3.686659 3.937738 4.740020 3.983384 |
|                                                                                     | 25 H 3.757348 4.225342 4.634591 5.281652 4.590626 |
|                                                                                     | 26 H 4.557531 4.617230 4.229542 6.240559 3.767869 |
|                                                                                     | 16 17 18 19 20                                    |
|                                                                                     | 16 C 0.000000                                     |
|                                                                                     | 17 H 1.080263 0.000000                            |
|                                                                                     | 18 C 1.414558 2.229465 0.000000                   |
|                                                                                     | 19 H 2.226503 2.685908 1.079839 0.000000          |
|                                                                                     | 20 C 2.282735 3.327789 1.414419 2.226634 0.000000 |
|                                                                                     | 21 S 3.381957 3.525414 4.062530 4.636155 4.281726 |
|                                                                                     | 22 S 4.285051 5.057930 4.054497 4.621851 3.374233 |
|                                                                                     | 23 C 4.349835 4.765935 4.960186 5.736275 4.672734 |
|                                                                                     | 24 C 4.684879 5.335026 4.957497 5.731324 4.336089 |
|                                                                                     | 25 H 5.556782 6.263830 5.795620 6.614722 4.992004 |
|                                                                                     | 26 H 5.009205 5.314498 5.800524 6.623414 5.543221 |
|                                                                                     | 21 22 23 24 25                                    |
|                                                                                     | 21 S 0.000000                                     |
|                                                                                     | 22 S 3.038574 0.000000                            |
|                                                                                     | 23 C 1.791758 2.690885 0.000000                   |
|                                                                                     | 24 C 2.691508 1.791075 1.327388 0.000000          |
|                                                                                     | 25 H 3.728025 2.485142 2.132537 1.084451 0.000000 |
|                                                                                     | 26 H 2.486243 3.727130 1.084399 2.132085 2.539403 |
|                                                                                     | 26                                                |
|                                                                                     | 26 H 0.000000                                     |
| 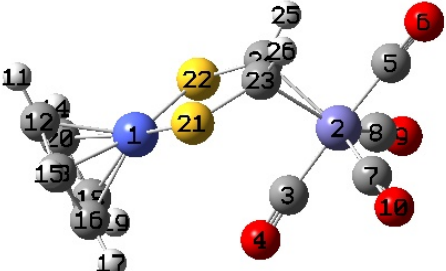 |                                                   |
| 4. -4165.595131 +3.0                                                                | 1 2 3 4 5                                         |
|                                                                                     | 1 Co 0.000000                                     |
|                                                                                     | 2 Fe 4.218975 0.000000                            |
|                                                                                     | 3 C 3.423538 1.800069 0.000000                    |
|                                                                                     | 4 O 3.438670 2.935926 1.138033 0.000000           |
|                                                                                     | 5 C 5.547276 1.796477 3.595882 4.729762 0.000000  |
|                                                                                     | 6 O 6.505160 2.935148 4.734426 5.867684 1.138675  |
|                                                                                     | 7 C 5.199573 1.773467 2.502317 3.373702 2.515604  |
|                                                                                     | 8 C 5.191384 1.773565 2.509769 3.386864 2.524978  |
|                                                                                     | 9 O 6.025379 2.915838 3.403378 4.075107 3.427366  |
|                                                                                     | 10 O 6.039340 2.915832 3.396376 4.059848 3.414246 |
|                                                                                     | 11 H 2.746799 6.744429 6.164043 6.139732 7.761159 |
|                                                                                     | 12 C 2.003431 6.200011 5.388417 5.230825 7.414152 |
|                                                                                     | 13 C 2.025765 5.956083 4.965111 4.683911 7.299596 |
|                                                                                     | 14 H 2.774910 6.335466 5.492730 5.299457 7.565113 |
|                                                                                     | 15 H 2.775669 6.312435 5.447943 5.236209 7.550437 |
|                                                                                     | 16 C 2.015181 5.506692 4.178444 3.639573 7.072343 |
|                                                                                     | 17 H 2.759658 5.480356 3.999620 3.300120 7.125289 |
|                                                                                     | 18 C 2.015903 5.516338 4.198480 3.670134 7.078503 |
|                                                                                     | 19 H 2.761046 5.499401 4.039840 3.364202 7.137540 |
|                                                                                     | 20 C 2.024958 5.968597 4.990703 4.720943 7.307266 |
|                                                                                     | 21 S 2.120358 3.392285 3.192079 3.629734 4.428381 |
|                                                                                     | 22 S 2.120171 3.390168 3.195657 3.639712 4.432018 |
|                                                                                     | 23 C 3.082824 2.129474 2.853389 3.755865 2.765607 |
|                                                                                     | 24 C 3.083054 2.128550 2.856012 3.761045 2.768395 |
|                                                                                     | 25 H 4.026814 2.657012 3.747250 4.708241 2.621806 |

|  |      |          |          |          |          |          |
|--|------|----------|----------|----------|----------|----------|
|  | 26 H | 4.026912 | 2.657604 | 3.743277 | 4.700575 | 2.615647 |
|  |      | 6        | 7        | 8        | 9        | 10       |
|  | 6 O  | 0.000000 |          |          |          |          |
|  | 7 C  | 3.418286 | 0.000000 |          |          |          |
|  | 8 C  | 3.432147 | 3.019119 | 0.000000 |          |          |
|  | 9 O  | 4.143648 | 4.025400 | 1.142475 | 0.000000 |          |
|  | 10 O | 4.122356 | 1.142588 | 4.024840 | 4.933961 | 0.000000 |
|  | 11 H | 8.537518 | 7.723989 | 7.731282 | 8.517943 | 8.509509 |
|  | 12 C | 8.292060 | 7.133259 | 7.133821 | 7.902215 | 7.904010 |
|  | 13 C | 8.239036 | 6.560864 | 7.066682 | 7.919335 | 7.175855 |
|  | 14 H | 8.449396 | 7.639632 | 6.720722 | 7.209969 | 8.578471 |
|  | 15 H | 8.437351 | 6.693912 | 7.610808 | 8.544839 | 7.184785 |
|  | 16 C | 8.113003 | 6.082839 | 6.411498 | 7.174101 | 6.693221 |
|  | 17 H | 8.199624 | 5.770139 | 6.412755 | 7.184825 | 6.234536 |
|  | 18 C | 8.118142 | 6.438339 | 6.077857 | 6.677635 | 7.211554 |
|  | 19 H | 8.209905 | 6.456601 | 5.769387 | 6.219422 | 7.242504 |
|  | 20 C | 8.245225 | 7.086389 | 6.570938 | 7.181434 | 7.944771 |
|  | 21 S | 5.297450 | 3.881664 | 4.932369 | 5.998932 | 4.568443 |
|  | 22 S | 5.305017 | 4.934800 | 3.867418 | 4.547317 | 6.004192 |
|  | 23 C | 3.598335 | 3.053446 | 3.678118 | 4.767109 | 3.982376 |
|  | 24 C | 3.603351 | 3.682234 | 3.043217 | 3.968940 | 4.773037 |
|  | 25 H | 3.176906 | 4.240016 | 3.217984 | 3.993920 | 5.329884 |
|  | 26 H | 3.165918 | 3.228956 | 4.237104 | 5.326180 | 4.008379 |
|  |      | 11       | 12       | 13       | 14       | 15       |
|  | 11 H | 0.000000 |          |          |          |          |
|  | 12 C | 1.080665 | 0.000000 |          |          |          |
|  | 13 C | 2.234055 | 1.422899 | 0.000000 |          |          |
|  | 14 H | 2.689624 | 2.235572 | 3.350098 | 0.000000 |          |
|  | 15 H | 2.689265 | 2.235268 | 1.080041 | 4.358095 | 0.000000 |
|  | 16 C | 3.333770 | 2.291158 | 1.414877 | 3.345147 | 2.229574 |
|  | 17 H | 4.343350 | 3.335168 | 2.228827 | 4.351497 | 2.687582 |
|  | 18 C | 3.334209 | 2.291618 | 2.301541 | 2.229469 | 3.345667 |
|  | 19 H | 4.343786 | 3.335618 | 3.342639 | 2.687337 | 4.352177 |
|  | 20 C | 2.234707 | 1.423504 | 2.307711 | 1.080039 | 3.350263 |
|  | 21 S | 4.017375 | 3.602801 | 3.113937 | 4.833778 | 3.149775 |
|  | 22 S | 4.052653 | 3.623360 | 4.107049 | 3.160392 | 4.844462 |
|  | 23 C | 5.128457 | 4.813548 | 4.662574 | 5.449431 | 4.855377 |
|  | 24 C | 5.141018 | 4.820664 | 5.001002 | 4.858087 | 5.454424 |
|  | 25 H | 5.779280 | 5.599444 | 5.936907 | 5.449199 | 6.381828 |
|  | 26 H | 5.760096 | 5.589150 | 5.424549 | 6.368670 | 5.452527 |
|  |      | 16       | 17       | 18       | 19       | 20       |
|  | 16 C | 0.000000 |          |          |          |          |
|  | 17 H | 1.080271 | 0.000000 |          |          |          |
|  | 18 C | 1.427455 | 2.236888 | 0.000000 |          |          |
|  | 19 H | 2.237232 | 2.688342 | 1.080238 | 0.000000 |          |
|  | 20 C | 2.300893 | 3.341854 | 1.414573 | 2.228392 | 0.000000 |
|  | 21 S | 3.344574 | 3.568288 | 3.949297 | 4.587336 | 4.100464 |
|  | 22 S | 3.932981 | 4.560593 | 3.325661 | 3.535666 | 3.118903 |
|  | 23 C | 4.713328 | 4.945166 | 4.922477 | 5.315679 | 4.997820 |
|  | 24 C | 4.916411 | 5.304357 | 4.708188 | 4.936422 | 4.663759 |



|                                                                                                            |                                                   |
|------------------------------------------------------------------------------------------------------------|---------------------------------------------------|
|                                                                                                            | 25 H 5.931544 6.370504 5.619712 5.814344 5.422277 |
|                                                                                                            | 26 H 5.630512 5.833214 5.938177 6.382526 5.929369 |
|                                                                                                            | 21 22 23 24 25                                    |
|                                                                                                            | 21 S 0.000000                                     |
|                                                                                                            | 22 S 3.089726 0.000000                            |
|                                                                                                            | 23 C 1.764623 2.732038 0.000000                   |
|                                                                                                            | 24 C 2.732343 1.764709 1.408156 0.000000          |
|                                                                                                            | 25 H 3.676661 2.401494 2.170382 1.085061 0.000000 |
|                                                                                                            | 26 H 2.401238 3.676806 1.085069 2.170258 2.508900 |
|                                                                                                            | 26 26                                             |
|                                                                                                            | 26 H 0.000000                                     |
| 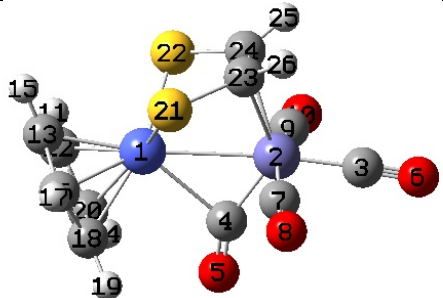<br>5. -4165.550276 +31.2 | 1 2 3 4 5                                         |
|                                                                                                            | 1 Co 0.000000                                     |
|                                                                                                            | 2 Fe 2.710941 0.000000                            |
|                                                                                                            | 3 C 4.455351 1.748862 0.000000                    |
|                                                                                                            | 4 C 2.295992 1.774935 3.022107 0.000000           |
|                                                                                                            | 5 O 3.104659 2.857011 3.771391 1.159658 0.000000  |
|                                                                                                            | 6 O 5.593584 2.890612 1.142264 4.026035 4.610294  |
|                                                                                                            | 7 C 3.339144 1.816499 2.399522 2.491801 3.304867  |
|                                                                                                            | 8 O 4.176344 2.946630 3.219196 3.380679 3.975876  |
|                                                                                                            | 9 C 3.439691 1.817306 2.403834 2.501103 3.292153  |
|                                                                                                            | 10 O 4.306069 2.948864 3.227017 3.398958 3.969186 |
|                                                                                                            | 11 H 2.814622 5.015607 6.650285 4.351192 4.730210 |
|                                                                                                            | 12 C 2.076713 4.564201 6.262921 3.744322 4.104006 |
|                                                                                                            | 13 C 2.041339 4.738668 6.486129 4.172531 4.691731 |
|                                                                                                            | 14 H 2.835799 4.353967 5.761704 2.878684 2.612597 |
|                                                                                                            | 15 H 2.766511 5.313894 7.044136 5.033180 5.667759 |
|                                                                                                            | 16 C 2.074168 4.535303 6.206494 3.752109 4.134726 |
|                                                                                                            | 17 H 2.812523 4.968102 6.551875 4.366005 4.782511 |
|                                                                                                            | 18 C 2.077473 4.156340 5.727516 2.894510 2.960866 |
|                                                                                                            | 19 H 2.837159 4.323640 5.694944 2.896171 2.674138 |
|                                                                                                            | 20 C 2.076431 4.173039 5.762802 2.885309 2.931751 |
|                                                                                                            | 21 S 2.259975 3.100414 4.535235 3.661817 4.654865 |
|                                                                                                            | 22 S 2.256375 3.092354 4.567005 3.591150 4.558876 |
|                                                                                                            | 23 C 2.906784 2.229226 3.320546 3.575300 4.722415 |
|                                                                                                            | 24 C 2.907852 2.234931 3.350751 3.552729 4.690189 |
|                                                                                                            | 25 H 3.951354 2.825266 3.429286 4.315074 5.418493 |
|                                                                                                            | 26 H 3.949790 2.818452 3.378143 4.349153 5.469222 |
|                                                                                                            | 6 7 8 9 10                                        |
|                                                                                                            | 6 O 0.000000                                      |
|                                                                                                            | 7 C 3.255040 0.000000                             |
|                                                                                                            | 8 O 3.827072 1.135051 0.000000                    |
|                                                                                                            | 9 C 3.276637 3.603788 4.712863 0.000000           |
|                                                                                                            | 10 O 3.859751 4.715612 5.809131 1.135835 0.000000 |
|                                                                                                            | 11 H 7.745112 6.078944 6.966204 4.763951 5.054330 |
|                                                                                                            | 12 C 7.381578 5.364900 6.158044 4.680338 5.181494 |
|                                                                                                            | 13 C 7.626219 5.159341 5.799042 5.295230 5.992217 |
|                                                                                                            | 14 H 6.753015 5.169177 5.934146 4.268077 4.645047 |
|                                                                                                            | 15 H 8.181774 5.731570 6.354796 5.858813 6.535958 |
|                                                                                                            | 16 C 7.309664 4.498941 4.929263 5.465478 6.311309 |

|  |    |   |          |          |          |          |          |
|--|----|---|----------|----------|----------|----------|----------|
|  | 17 | H | 7.617437 | 4.559600 | 4.767976 | 6.149600 | 7.083911 |
|  | 18 | C | 6.786250 | 4.236847 | 4.722786 | 4.936845 | 5.718589 |
|  | 19 | H | 6.665887 | 4.090329 | 4.387985 | 5.255766 | 6.073023 |
|  | 20 | C | 6.831790 | 4.822733 | 5.548443 | 4.401481 | 4.956652 |
|  | 21 | S | 5.575793 | 2.906154 | 3.438246 | 4.452350 | 5.488040 |
|  | 22 | S | 5.628885 | 4.422582 | 5.455677 | 2.932060 | 3.471794 |
|  | 23 | C | 4.292014 | 2.611168 | 3.432171 | 3.399266 | 4.400434 |
|  | 24 | C | 4.333149 | 3.437596 | 4.452444 | 2.571490 | 3.374061 |
|  | 25 | H | 4.215760 | 4.107426 | 5.104445 | 2.726045 | 3.282585 |
|  | 26 | H | 4.141697 | 2.814887 | 3.413633 | 4.036529 | 5.007935 |
|  |    |   | 11       | 12       | 13       | 14       | 15       |
|  | 11 | H | 0.000000 |          |          |          |          |
|  | 12 | C | 1.080782 | 0.000000 |          |          |          |
|  | 13 | C | 2.231114 | 1.421432 | 0.000000 |          |          |
|  | 14 | H | 2.679460 | 2.224110 | 3.338387 | 0.000000 |          |
|  | 15 | H | 2.689024 | 2.235865 | 1.079067 | 4.345910 | 0.000000 |
|  | 16 | C | 3.338111 | 2.294055 | 1.423664 | 3.335181 | 2.237763 |
|  | 17 | H | 4.347646 | 3.337710 | 2.233003 | 4.346290 | 2.690877 |
|  | 18 | C | 3.340095 | 2.295122 | 2.295321 | 2.241240 | 3.336293 |
|  | 19 | H | 4.347593 | 3.336564 | 3.339792 | 2.695209 | 4.347144 |
|  | 20 | C | 2.219754 | 1.407389 | 2.294223 | 1.079150 | 3.335337 |
|  | 21 | S | 4.681844 | 4.005707 | 3.209566 | 5.054690 | 3.327135 |
|  | 22 | S | 2.938355 | 3.013496 | 3.251883 | 4.122363 | 3.392123 |
|  | 23 | C | 5.201031 | 4.777973 | 4.403194 | 5.528939 | 4.536036 |
|  | 24 | C | 4.596922 | 4.442014 | 4.414883 | 5.178620 | 4.552457 |
|  | 25 | H | 5.373519 | 5.361221 | 5.428207 | 6.006340 | 5.504949 |
|  | 26 | H | 6.282651 | 5.855440 | 5.410425 | 6.541968 | 5.479579 |
|  |    |   | 16       | 17       | 18       | 19       | 20       |
|  | 16 | C | 0.000000 |          |          |          |          |
|  | 17 | H | 1.080615 | 0.000000 |          |          |          |
|  | 18 | C | 1.406792 | 2.219473 | 0.000000 |          |          |
|  | 19 | H | 2.223406 | 2.678932 | 1.079401 | 0.000000 |          |
|  | 20 | C | 2.294233 | 3.339297 | 1.432244 | 2.242077 | 0.000000 |
|  | 21 | S | 2.996388 | 2.921780 | 3.668763 | 4.156443 | 4.225535 |
|  | 22 | S | 4.030425 | 4.713899 | 4.224022 | 5.043752 | 3.654168 |
|  | 23 | C | 4.425974 | 4.574982 | 4.745178 | 5.177593 | 4.951127 |
|  | 24 | C | 4.777567 | 5.197556 | 4.949992 | 5.522457 | 4.748170 |
|  | 25 | H | 5.856772 | 6.279694 | 5.984446 | 6.531538 | 5.684347 |
|  | 26 | H | 5.338483 | 5.341240 | 5.679353 | 6.004332 | 5.986400 |
|  |    |   | 21       | 22       | 23       | 24       | 25       |
|  | 21 | S | 0.000000 |          |          |          |          |
|  | 22 | S | 3.102851 | 0.000000 |          |          |          |
|  | 23 | C | 1.759565 | 2.718220 | 0.000000 |          |          |
|  | 24 | C | 2.714221 | 1.758370 | 1.380686 | 0.000000 |          |
|  | 25 | H | 3.705024 | 2.463423 | 2.143298 | 1.086302 | 0.000000 |
|  | 26 | H | 2.464429 | 3.709918 | 1.086176 | 2.143866 | 2.473429 |
|  |    |   | 26       |          |          |          |          |
|  | 26 | H | 0.000000 |          |          |          |          |

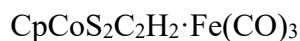

|                            |          |          |          |          |          |          |
|----------------------------|----------|----------|----------|----------|----------|----------|
| <p>1. -4052.376675 0.0</p> |          |          |          |          |          |          |
|                            | 1        | 2        | 3        | 4        | 5        |          |
|                            | 1 Co     | 0.000000 |          |          |          |          |
|                            | 2 Fe     | 2.298993 | 0.000000 |          |          |          |
|                            | 3 C      | 3.964980 | 1.772429 | 0.000000 |          |          |
|                            | 4 O      | 5.076989 | 2.911505 | 1.139144 | 0.000000 |          |
|                            | 5 C      | 3.045184 | 1.754117 | 2.734941 | 3.685290 | 0.000000 |
|                            | 6 O      | 3.867644 | 2.895817 | 3.708682 | 4.521942 | 1.142313 |
|                            | 7 C      | 3.054853 | 1.754186 | 2.734419 | 3.686823 | 2.511973 |
|                            | 8 O      | 3.880353 | 2.895858 | 3.707669 | 4.523529 | 3.431748 |
|                            | 9 H      | 2.788044 | 4.896813 | 6.409977 | 7.449049 | 5.800649 |
|                            | 10 C     | 2.033149 | 4.260141 | 5.906381 | 7.001105 | 4.925495 |
|                            | 11 C     | 2.033161 | 4.261810 | 5.905970 | 6.999242 | 4.555051 |
|                            | 12 H     | 2.779272 | 4.116269 | 5.702326 | 6.771737 | 4.803458 |
|                            | 13 H     | 2.788298 | 4.899870 | 6.409592 | 7.446064 | 5.191632 |
|                            | 14 C     | 2.018476 | 3.790229 | 5.497416 | 6.613028 | 3.587864 |
|                            | 15 H     | 2.779829 | 4.122346 | 5.701863 | 6.766673 | 3.498293 |
|                            | 16 C     | 2.050069 | 3.513812 | 5.276687 | 6.411288 | 3.442384 |
|                            | 17 H     | 2.821240 | 3.625408 | 5.288598 | 6.384841 | 3.207069 |
|                            | 18 C     | 2.018483 | 3.787174 | 5.498119 | 6.616216 | 4.311103 |
|                            | 19 S     | 2.233501 | 2.303987 | 3.206856 | 4.103735 | 2.865213 |
|                            | 20 S     | 2.233147 | 2.303725 | 3.216428 | 4.118429 | 3.958128 |
|                            | 21 C     | 3.110601 | 3.166468 | 3.542343 | 4.192529 | 4.338592 |
|                            | 22 C     | 3.110629 | 3.166386 | 3.546121 | 4.198822 | 4.705422 |
| 23 H                       | 4.087752 | 4.133183 | 4.272998 | 4.739164 | 5.736636 |          |
| 24 H                       | 4.087704 | 4.133406 | 4.267068 | 4.728519 | 5.145774 |          |
|                            | 6        | 7        | 8        | 9        | 10       |          |
| 6 O                        | 0.000000 |          |          |          |          |          |
| 7 C                        | 3.430895 | 0.000000 |          |          |          |          |
| 8 O                        | 4.167688 | 1.142289 | 0.000000 |          |          |          |
| 9 H                        | 6.544463 | 5.194939 | 5.637371 | 0.000000 |          |          |
| 10 C                       | 5.582510 | 4.562174 | 5.044501 | 1.080261 | 0.000000 |          |
| 11 C                       | 5.032891 | 4.937093 | 5.598959 | 2.224166 | 1.407965 |          |
| 12 H                       | 5.488390 | 3.500741 | 3.489812 | 2.695472 | 2.242705 |          |
| 13 H                       | 5.630871 | 5.812116 | 6.560078 | 2.684727 | 2.224175 |          |
| 14 C                       | 3.856649 | 4.326977 | 4.958209 | 3.342380 | 2.296552 |          |
| 15 H                       | 3.481110 | 4.822021 | 5.513285 | 4.351173 | 3.338890 |          |
| 16 C                       | 3.816953 | 3.457225 | 3.839914 | 3.349277 | 2.307573 |          |
| 17 H                       | 3.395998 | 3.223944 | 3.423567 | 4.360324 | 3.352581 |          |
| 18 C                       | 4.936026 | 3.595770 | 3.870985 | 2.241222 | 1.431703 |          |
| 19 S                       | 3.640542 | 3.962044 | 5.067014 | 4.525213 | 3.968912 |          |
| 20 S                       | 5.061869 | 2.862645 | 3.636264 | 3.528600 | 3.395978 |          |
| 21 C                       | 5.264148 | 4.704065 | 5.760841 | 4.596663 | 4.445909 |          |
| 22 C                       | 5.763156 | 4.334761 | 5.258075 | 4.190486 | 4.229710 |          |
| 23 H                       | 6.812025 | 5.139805 | 5.968599 | 4.679162 | 4.931373 |          |
| 24 H                       | 5.978134 | 5.734946 | 6.809160 | 5.367701 | 5.287121 |          |
|                            | 11       | 12       | 13       | 14       | 15       |          |
| 11 C                       | 0.000000 |          |          |          |          |          |
| 12 H                       | 3.338924 | 0.000000 |          |          |          |          |

|                                                                                                                 |                                                                                                                                                                                                                                                                                                                                                                                                                                                                                                                                                                                                                                                                                                                                                                                                                                                                                                                                                                                                                                                                                                                                                                                             |
|-----------------------------------------------------------------------------------------------------------------|---------------------------------------------------------------------------------------------------------------------------------------------------------------------------------------------------------------------------------------------------------------------------------------------------------------------------------------------------------------------------------------------------------------------------------------------------------------------------------------------------------------------------------------------------------------------------------------------------------------------------------------------------------------------------------------------------------------------------------------------------------------------------------------------------------------------------------------------------------------------------------------------------------------------------------------------------------------------------------------------------------------------------------------------------------------------------------------------------------------------------------------------------------------------------------------------|
|                                                                                                                 | 13 H 1.080234 4.351169 0.000000<br>14 C 1.431679 3.334734 2.241201 0.000000<br>15 H 2.242760 4.345600 2.695609 1.080623 0.000000<br>16 C 2.307625 2.231548 3.349316 1.417990 2.231463<br>17 H 3.352612 2.689579 4.360337 2.232165 2.689389<br>18 C 2.296633 1.080641 3.342450 2.290256 3.334689<br>19 S 3.400976 4.984846 3.535407 3.346725 3.454930<br>20 S 3.966423 3.448483 4.523505 4.242908 4.986095<br>21 C 4.231989 5.538007 4.194424 4.661616 4.994900<br>22 C 4.445746 4.990638 4.597564 4.975734 5.540777<br>23 H 5.286225 5.647595 5.367709 5.952709 6.564793<br>24 H 4.934335 6.562539 4.684059 5.437481 5.652238<br>16 17 18 19 20<br>16 C 0.000000<br>17 H 1.080368 0.000000<br>18 C 1.417945 2.232156 0.000000<br>19 S 3.935652 4.477749 4.243707 0.000000<br>20 S 3.933913 4.477007 3.342242 2.977877 0.000000<br>21 C 5.130813 5.799371 4.974956 1.780310 2.667125<br>22 C 5.130327 5.799190 4.659304 2.667420 1.780137<br>23 H 6.067323 6.758015 5.434775 3.709896 2.472666<br>24 H 6.068129 6.758357 5.952451 2.472822 3.709568<br>21 22 23 24<br>21 C 0.000000<br>22 C 1.324819 0.000000<br>23 H 2.139331 1.083595 0.000000<br>24 H 1.083587 2.139224 2.568154 0.000000 |
| 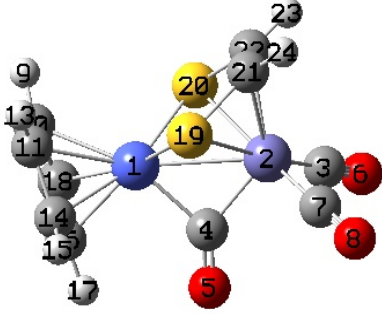 <p>2. -4052.369928 +4.2</p> | 1 2 3 4 5<br>1 Co 0.000000<br>2 Fe 2.597889 0.000000<br>3 C 3.894648 1.744343 0.000000<br>4 C 1.904582 1.882942 2.729784 0.000000<br>5 O 2.852726 2.872408 3.272586 1.173391 0.000000<br>6 O 4.894732 2.884713 1.140378 3.644093 3.947096<br>7 C 3.893940 1.744144 2.490105 2.729538 3.272439<br>8 O 4.893717 2.884517 3.398291 3.644125 3.947512<br>9 H 2.955730 5.140831 6.164191 4.723121 5.514640<br>10 C 2.205140 4.669699 5.790758 3.959381 4.665419<br>11 C 2.204828 4.668310 6.078962 3.957001 4.662299<br>12 H 2.798521 4.740907 5.240742 3.601016 3.904859<br>13 H 2.955034 5.138054 6.675567 4.719037 5.509371<br>14 C 2.042470 4.378552 5.740259 3.216967 3.654633<br>15 H 2.798596 4.737617 6.180935 3.593804 3.894074<br>16 C 2.043182 4.310559 5.310778 2.788720 2.976207<br>17 H 2.735736 4.523381 5.305526 2.736008 2.477567<br>18 C 2.042524 4.380553 5.225507 3.221308 3.660753<br>19 S 2.255909 2.372074 4.113017 2.911705 3.943326<br>20 S 2.255469 2.373957 2.997081 2.912844 3.944646<br>21 C 3.171535 2.109204 3.497133 3.591067 4.715371<br>22 C 3.171202 2.109360 2.969177 3.590868 4.715210                                                                      |

|  |    |   |          |          |          |          |          |  |  |
|--|----|---|----------|----------|----------|----------|----------|--|--|
|  | 23 | H | 4.207267 | 2.867486 | 3.213110 | 4.479671 | 5.543338 |  |  |
|  | 24 | H | 4.207612 | 2.867286 | 4.072597 | 4.479870 | 5.543484 |  |  |
|  |    |   | 6        | 7        | 8        | 9        | 10       |  |  |
|  | 6  | O | 0.000000 |          |          |          |          |  |  |
|  | 7  | C | 3.397790 | 0.000000 |          |          |          |  |  |
|  | 8  | O | 4.114774 | 1.140378 | 0.000000 |          |          |  |  |
|  | 9  | H | 6.990363 | 6.675629 | 7.727329 | 0.000000 |          |  |  |
|  | 10 | C | 6.670292 | 6.078118 | 7.079952 | 1.080581 | 0.000000 |  |  |
|  | 11 | C | 7.081870 | 5.785692 | 6.663342 | 2.200912 | 1.383523 |  |  |
|  | 12 | H | 5.831877 | 6.185802 | 7.201094 | 2.705782 | 2.253574 |  |  |
|  | 13 | H | 7.728602 | 6.156000 | 6.979244 | 2.657264 | 2.200931 |  |  |
|  | 14 | C | 6.725452 | 5.221155 | 5.985729 | 3.334590 | 2.288695 |  |  |
|  | 15 | H | 7.195288 | 5.234183 | 5.823595 | 4.341694 | 3.328966 |  |  |
|  | 16 | C | 6.145358 | 5.311199 | 6.146092 | 3.349983 | 2.309366 |  |  |
|  | 17 | H | 6.036058 | 5.307748 | 6.039607 | 4.361210 | 3.354679 |  |  |
|  | 18 | C | 5.991230 | 5.742436 | 6.727816 | 2.248981 | 1.442811 |  |  |
|  | 19 | S | 5.252582 | 2.993499 | 3.800042 | 4.439427 | 3.909656 |  |  |
|  | 20 | S | 3.804649 | 4.114628 | 5.254128 | 3.355310 | 3.299507 |  |  |
|  | 21 | C | 4.541298 | 2.968589 | 3.869383 | 4.928045 | 4.720164 |  |  |
|  | 22 | C | 3.870764 | 3.497362 | 4.541215 | 4.545061 | 4.515678 |  |  |
|  | 23 | H | 3.875428 | 4.073227 | 5.036862 | 5.310593 | 5.420262 |  |  |
|  | 24 | H | 5.036378 | 3.212546 | 3.873820 | 5.903849 | 5.730766 |  |  |
|  |    |   | 11       | 12       | 13       | 14       | 15       |  |  |
|  | 11 | C | 0.000000 |          |          |          |          |  |  |
|  | 12 | H | 3.328702 | 0.000000 |          |          |          |  |  |
|  | 13 | H | 1.080593 | 4.341457 | 0.000000 |          |          |  |  |
|  | 14 | C | 1.442809 | 3.326211 | 2.248785 | 0.000000 |          |  |  |
|  | 15 | H | 2.253683 | 4.338412 | 2.705679 | 1.080599 | 0.000000 |  |  |
|  | 16 | C | 2.309230 | 2.227838 | 3.349795 | 1.414550 | 2.227864 |  |  |
|  | 17 | H | 3.354525 | 2.685045 | 4.360967 | 2.227246 | 2.684929 |  |  |
|  | 18 | C | 2.288429 | 1.080610 | 3.334349 | 2.280998 | 3.326192 |  |  |
|  | 19 | S | 3.296939 | 5.038366 | 3.350385 | 3.264640 | 3.397898 |  |  |
|  | 20 | S | 3.912449 | 3.394267 | 4.443618 | 4.235297 | 5.038815 |  |  |
|  | 21 | C | 4.515296 | 5.627881 | 4.544000 | 4.749727 | 5.074351 |  |  |
|  | 22 | C | 4.721834 | 5.070983 | 4.930668 | 5.068208 | 5.629882 |  |  |
|  | 23 | H | 5.733130 | 5.840748 | 5.907637 | 6.135232 | 6.713206 |  |  |
|  | 24 | H | 5.419224 | 6.711239 | 5.308416 | 5.648381 | 5.844521 |  |  |
|  |    |   | 16       | 17       | 18       | 19       | 20       |  |  |
|  | 16 | C | 0.000000 |          |          |          |          |  |  |
|  | 17 | H | 1.079686 | 0.000000 |          |          |          |  |  |
|  | 18 | C | 1.414498 | 2.227294 | 0.000000 |          |          |  |  |
|  | 19 | S | 3.972096 | 4.543267 | 4.234980 | 0.000000 |          |  |  |
|  | 20 | S | 3.969699 | 4.539115 | 3.262963 | 3.193350 | 0.000000 |  |  |
|  | 21 | C | 5.182540 | 5.744914 | 5.067132 | 1.758498 | 2.733828 |  |  |
|  | 22 | C | 5.181531 | 5.743153 | 4.748003 | 2.733692 | 1.758381 |  |  |
|  | 23 | H | 6.181785 | 6.712912 | 5.646587 | 3.745132 | 2.447602 |  |  |
|  | 24 | H | 6.183178 | 6.715517 | 6.134109 | 2.447611 | 3.745353 |  |  |
|  |    |   | 21       | 22       | 23       | 24       |          |  |  |
|  | 21 | C | 0.000000 |          |          |          |          |  |  |
|  | 22 | C | 1.372019 | 0.000000 |          |          |          |  |  |

|                                                                                                                |      |          |          |          |          |          |
|----------------------------------------------------------------------------------------------------------------|------|----------|----------|----------|----------|----------|
| 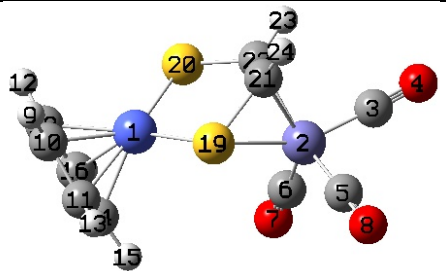 <p>3. -4052.353831 +14.3</p> | 23 H | 2.150923 | 1.083658 | 0.000000 |          |          |
|                                                                                                                | 24 H | 1.083655 | 2.151168 | 2.516500 | 0.000000 |          |
|                                                                                                                |      | 1        | 2        | 3        | 4        | 5        |
|                                                                                                                | 1 Co | 0.000000 |          |          |          |          |
|                                                                                                                | 2 Fe | 3.624046 | 0.000000 |          |          |          |
|                                                                                                                | 3 C  | 5.154551 | 1.746525 | 0.000000 |          |          |
|                                                                                                                | 4 O  | 6.205166 | 2.889156 | 1.143716 | 0.000000 |          |
|                                                                                                                | 5 C  | 4.811368 | 1.780937 | 2.539636 | 3.462214 | 0.000000 |
|                                                                                                                | 6 C  | 3.733148 | 1.785375 | 2.696350 | 3.662679 | 2.842503 |
|                                                                                                                | 7 O  | 4.169436 | 2.927634 | 3.668514 | 4.498373 | 3.832772 |
|                                                                                                                | 8 O  | 5.722193 | 2.922598 | 3.470845 | 4.217599 | 1.141969 |
|                                                                                                                | 9 H  | 2.781135 | 6.071654 | 7.625343 | 8.660507 | 6.910253 |
|                                                                                                                | 10 C | 2.029513 | 5.517368 | 7.111944 | 8.173890 | 6.430527 |
|                                                                                                                | 11 C | 2.044267 | 4.983761 | 6.690316 | 7.810837 | 5.632071 |
|                                                                                                                | 12 H | 2.780980 | 6.223301 | 7.530165 | 8.452930 | 7.568896 |
|                                                                                                                | 13 H | 2.792586 | 5.109750 | 6.850755 | 7.986858 | 5.418345 |
|                                                                                                                | 14 C | 2.012904 | 4.679673 | 6.309130 | 7.406722 | 5.503051 |
|                                                                                                                | 15 H | 2.759594 | 4.550085 | 6.144431 | 7.237417 | 5.178765 |
|                                                                                                                | 16 C | 2.021297 | 5.118329 | 6.574356 | 7.590807 | 6.293995 |
|                                                                                                                | 17 H | 2.762306 | 5.354731 | 6.634846 | 7.575111 | 6.653142 |
|                                                                                                                | 18 C | 2.029943 | 5.606541 | 7.058398 | 8.058335 | 6.812336 |
|                                                                                                                | 19 S | 2.203645 | 2.334647 | 3.960300 | 5.053812 | 2.980746 |
|                                                                                                                | 20 S | 2.061823 | 3.284188 | 4.233035 | 5.065893 | 4.954162 |
|                                                                                                                | 21 C | 3.179445 | 1.925003 | 2.903299 | 3.818618 | 2.992119 |
|                                                                                                                | 22 C | 3.048646 | 2.046603 | 2.696240 | 3.517398 | 3.685928 |
|                                                                                                                | 23 H | 4.030579 | 2.740209 | 2.695924 | 3.184618 | 4.312232 |
|                                                                                                                | 24 H | 4.074803 | 2.736494 | 3.329427 | 4.050730 | 3.375768 |
|                                                                                                                |      | 6        | 7        | 8        | 9        | 10       |
|                                                                                                                | 6 C  | 0.000000 |          |          |          |          |
|                                                                                                                | 7 O  | 1.143168 | 0.000000 |          |          |          |
|                                                                                                                | 8 O  | 3.823821 | 4.696767 | 0.000000 |          |          |
|                                                                                                                | 9 H  | 6.438137 | 6.859175 | 7.597328 | 0.000000 |          |
|                                                                                                                | 10 C | 5.634139 | 5.942033 | 7.169445 | 1.080619 | 0.000000 |
|                                                                                                                | 11 C | 4.944400 | 5.200807 | 6.263740 | 2.226622 | 1.414429 |
|                                                                                                                | 12 H | 6.093908 | 6.225265 | 8.501870 | 2.698136 | 2.240977 |
|                                                                                                                | 13 H | 5.244845 | 5.594442 | 5.875355 | 2.680263 | 2.226864 |
|                                                                                                                | 14 C | 4.157900 | 4.153678 | 6.232792 | 3.335227 | 2.292266 |
|                                                                                                                | 15 H | 3.750519 | 3.582467 | 5.829567 | 4.345222 | 3.336591 |
|                                                                                                                | 16 C | 4.536462 | 4.451386 | 7.170087 | 3.339241 | 2.296313 |
|                                                                                                                | 17 H | 4.490939 | 4.192979 | 7.583714 | 4.349891 | 3.340872 |
|                                                                                                                | 18 C | 5.427916 | 5.560368 | 7.688928 | 2.241648 | 1.429233 |
|                                                                                                                | 19 S | 3.313195 | 4.199560 | 3.777925 | 3.966336 | 3.593198 |
|                                                                                                                | 20 S | 3.494113 | 4.015390 | 6.050706 | 4.352609 | 3.805386 |
|                                                                                                                | 21 C | 3.461540 | 4.524622 | 3.942333 | 5.061783 | 4.811809 |
|                                                                                                                | 22 C | 3.038410 | 3.953894 | 4.784365 | 5.331740 | 4.920984 |
|                                                                                                                | 23 H | 3.696015 | 4.561362 | 5.386200 | 6.199197 | 5.847995 |
|                                                                                                                | 24 H | 4.424893 | 5.525371 | 4.134547 | 5.544172 | 5.479897 |
|                                                                                                                |      | 11       | 12       | 13       | 14       | 15       |
|                                                                                                                | 11 C | 0.000000 |          |          |          |          |
|                                                                                                                | 12 H | 3.344854 | 0.000000 |          |          |          |

|  |      |          |          |          |          |          |
|--|------|----------|----------|----------|----------|----------|
|  | 13 H | 1.080303 | 4.354052 | 0.000000 |          |          |
|  | 14 C | 1.418752 | 3.342991 | 2.230633 | 0.000000 |          |
|  | 15 H | 2.234750 | 4.350516 | 2.690703 | 1.080761 | 0.000000 |
|  | 16 C | 2.302575 | 2.226223 | 3.346282 | 1.428807 | 2.239565 |
|  | 17 H | 3.344636 | 2.683645 | 4.353873 | 2.238705 | 2.691957 |
|  | 18 C | 2.302620 | 1.080138 | 3.346198 | 2.298549 | 3.340477 |
|  | 19 S | 3.122038 | 4.885311 | 3.106245 | 3.429765 | 3.686065 |
|  | 20 S | 4.100673 | 3.431819 | 4.824062 | 3.768233 | 4.290960 |
|  | 21 C | 4.684883 | 5.540211 | 4.816964 | 4.840652 | 5.116663 |
|  | 22 C | 4.936824 | 5.079988 | 5.346528 | 4.760217 | 5.049152 |
|  | 23 H | 5.976977 | 5.739367 | 6.415249 | 5.768575 | 6.057701 |
|  | 24 H | 5.433280 | 6.283241 | 5.442615 | 5.771137 | 6.081797 |
|  |      | 16       | 17       | 18       | 19       | 20       |
|  | 16 C | 0.000000 |          |          |          |          |
|  | 17 H | 1.080247 | 0.000000 |          |          |          |
|  | 18 C | 1.411749 | 2.225931 | 0.000000 |          |          |
|  | 19 S | 4.065572 | 4.741002 | 4.150080 | 0.000000 |          |
|  | 20 S | 3.245586 | 3.378726 | 3.269124 | 3.048590 | 0.000000 |
|  | 21 C | 5.103050 | 5.564479 | 5.083743 | 1.772187 | 2.784834 |
|  | 22 C | 4.679868 | 4.892265 | 4.778251 | 2.598973 | 1.788713 |
|  | 23 H | 5.546441 | 5.639607 | 5.594252 | 3.635822 | 2.400366 |
|  | 24 H | 6.058970 | 6.576493 | 5.887621 | 2.503163 | 3.681306 |
|  |      | 21       | 22       | 23       | 24       |          |
|  | 21 C | 0.000000 |          |          |          |          |
|  | 22 C | 1.426479 | 0.000000 |          |          |          |
|  | 23 H | 2.171028 | 1.087179 | 0.000000 |          |          |
|  | 24 H | 1.083436 | 2.268250 | 2.644781 | 0.000000 |          |

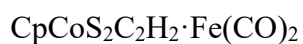

|                                                                                     |          |          |          |          |          |          |  |
|-------------------------------------------------------------------------------------|----------|----------|----------|----------|----------|----------|--|
| 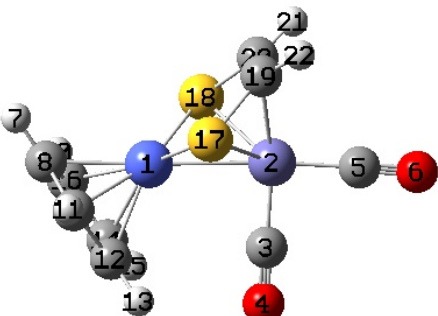 |          | 1        | 2        | 3        | 4        | 5        |  |
|                                                                                     | 1 Co     | 0.000000 |          |          |          |          |  |
|                                                                                     | 2 Fe     | 2.440837 | 0.000000 |          |          |          |  |
|                                                                                     | 3 C      | 2.907585 | 1.741059 | 0.000000 |          |          |  |
|                                                                                     | 4 O      | 3.672924 | 2.890262 | 1.149253 | 0.000000 |          |  |
|                                                                                     | 5 C      | 4.174440 | 1.736359 | 2.445691 | 3.348602 | 0.000000 |  |
|                                                                                     | 6 O      | 5.320387 | 2.884115 | 3.338768 | 4.031992 | 1.147949 |  |
|                                                                                     | 7 H      | 2.807231 | 5.165295 | 5.657302 | 6.243579 | 6.892741 |  |
|                                                                                     | 8 C      | 2.037933 | 4.477939 | 4.730098 | 5.229828 | 6.212320 |  |
|                                                                                     | 9 C      | 2.020225 | 4.198965 | 4.203241 | 4.595316 | 5.858676 |  |
|                                                                                     | 10 H     | 2.774628 | 4.680671 | 4.789305 | 5.201849 | 6.257963 |  |
|                                                                                     | 11 H     | 2.774271 | 4.690800 | 4.801165 | 5.212437 | 6.269378 |  |
|                                                                                     | 12 C     | 2.034605 | 3.738421 | 3.205072 | 3.351553 | 5.267695 |  |
|                                                                                     | 13 H     | 2.795637 | 3.888808 | 3.016798 | 2.917766 | 5.188377 |  |
|                                                                                     | 14 C     | 2.035014 | 3.734606 | 3.199598 | 3.346451 | 5.263595 |  |
| 15 H                                                                                | 2.795794 | 3.881241 | 3.005244 | 2.906288 | 5.179867 |          |  |

|  |    |   |          |          |          |          |          |  |  |
|--|----|---|----------|----------|----------|----------|----------|--|--|
|  | 16 | C | 2.020544 | 4.193055 | 4.196113 | 4.588971 | 5.852285 |  |  |
|  | 17 | S | 2.149317 | 2.252265 | 3.317742 | 4.275252 | 3.586422 |  |  |
|  | 18 | S | 2.149802 | 2.252486 | 3.321808 | 4.281815 | 3.588993 |  |  |
|  | 19 | C | 3.017556 | 2.090272 | 3.760397 | 4.890731 | 2.957532 |  |  |
|  | 20 | C | 3.017844 | 2.090322 | 3.761886 | 4.893153 | 2.958726 |  |  |
|  | 21 | H | 4.062669 | 2.862604 | 4.487522 | 5.598066 | 3.192873 |  |  |
|  | 22 | H | 4.062288 | 2.862352 | 4.485074 | 5.594049 | 3.190579 |  |  |
|  |    |   | 6        | 7        | 8        | 9        | 10       |  |  |
|  | 6  | O | 0.000000 |          |          |          |          |  |  |
|  | 7  | H | 8.038668 | 0.000000 |          |          |          |  |  |
|  | 8  | C | 7.358275 | 1.079804 | 0.000000 |          |          |  |  |
|  | 9  | C | 6.972958 | 2.237288 | 1.420398 | 0.000000 |          |  |  |
|  | 10 | H | 7.337281 | 2.691412 | 2.230235 | 3.329178 | 0.000000 |  |  |
|  | 11 | H | 7.350126 | 2.691358 | 2.230241 | 1.080756 | 4.339823 |  |  |
|  | 12 | C | 6.329115 | 3.355163 | 2.311246 | 1.422915 | 3.338113 |  |  |
|  | 13 | H | 6.155349 | 4.364352 | 3.354037 | 2.237474 | 4.348794 |  |  |
|  | 14 | C | 6.324577 | 3.355111 | 2.311193 | 2.295273 | 2.231962 |  |  |
|  | 15 | H | 6.145894 | 4.364223 | 3.353924 | 3.339890 | 2.689213 |  |  |
|  | 16 | C | 6.965867 | 2.237391 | 1.420447 | 2.284764 | 1.080763 |  |  |
|  | 17 | S | 4.622857 | 4.083723 | 3.640353 | 3.119724 | 4.858247 |  |  |
|  | 18 | S | 4.625069 | 4.071680 | 3.632200 | 4.114286 | 3.137258 |  |  |
|  | 19 | C | 3.880436 | 4.969874 | 4.678521 | 4.561369 | 5.336099 |  |  |
|  | 20 | C | 3.881392 | 4.965774 | 4.675934 | 4.894196 | 4.739101 |  |  |
|  | 21 | H | 3.868043 | 5.896118 | 5.669421 | 5.965689 | 5.502784 |  |  |
|  | 22 | H | 3.865992 | 5.902488 | 5.673359 | 5.469180 | 6.413537 |  |  |
|  |    |   | 11       | 12       | 13       | 14       | 15       |  |  |
|  | 11 | H | 0.000000 |          |          |          |          |  |  |
|  | 12 | C | 2.232121 | 0.000000 |          |          |          |  |  |
|  | 13 | H | 2.689562 | 1.080100 | 0.000000 |          |          |  |  |
|  | 14 | C | 3.338190 | 1.419700 | 2.233239 | 0.000000 |          |  |  |
|  | 15 | H | 4.348898 | 2.233260 | 2.691275 | 1.080086 | 0.000000 |  |  |
|  | 16 | C | 3.329204 | 2.295191 | 3.339794 | 1.422720 | 2.237173 |  |  |
|  | 17 | S | 3.145829 | 3.390038 | 3.641723 | 3.997255 | 4.664899 |  |  |
|  | 18 | S | 4.855538 | 4.000135 | 4.671448 | 3.392664 | 3.647594 |  |  |
|  | 19 | C | 4.743055 | 4.745617 | 5.076879 | 4.947629 | 5.429595 |  |  |
|  | 20 | C | 5.336606 | 4.949038 | 5.433033 | 4.746187 | 5.077744 |  |  |
|  | 21 | H | 6.413601 | 5.986304 | 6.451111 | 5.682302 | 5.906349 |  |  |
|  | 22 | H | 5.508239 | 5.681321 | 5.904447 | 5.984262 | 6.446263 |  |  |
|  |    |   | 16       | 17       | 18       | 19       | 20       |  |  |
|  | 16 | C | 0.000000 |          |          |          |          |  |  |
|  | 17 | S | 4.116925 | 0.000000 |          |          |          |  |  |
|  | 18 | S | 3.114073 | 3.161497 | 0.000000 |          |          |  |  |
|  | 19 | C | 4.894255 | 1.729895 | 2.713271 | 0.000000 |          |  |  |
|  | 20 | C | 4.558997 | 2.713528 | 1.729819 | 1.382299 | 0.000000 |  |  |
|  | 21 | H | 5.465922 | 3.715938 | 2.433685 | 2.149874 | 1.083712 |  |  |
|  | 22 | H | 5.966142 | 2.433601 | 3.715696 | 1.083710 | 2.149819 |  |  |
|  |    |   | 21       | 22       |          |          |          |  |  |
|  | 21 | H | 0.000000 |          |          |          |          |  |  |
|  | 22 | H | 2.493969 | 0.000000 |          |          |          |  |  |



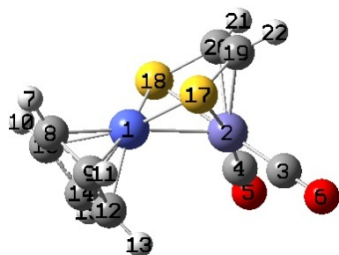

2. -3939.111699 +6.4

|      | 1        | 2        | 3        | 4        | 5        |
|------|----------|----------|----------|----------|----------|
| 1 Co | 0.000000 |          |          |          |          |
| 2 Fe | 2.465287 | 0.000000 |          |          |          |
| 3 C  | 3.758479 | 1.736159 | 0.000000 |          |          |
| 4 C  | 3.617970 | 1.734794 | 2.402802 | 0.000000 |          |
| 5 O  | 4.599716 | 2.882751 | 3.292406 | 1.148153 | 0.000000 |
| 6 O  | 4.784612 | 2.883208 | 1.147526 | 3.282016 | 3.948845 |
| 7 H  | 2.820880 | 5.226687 | 6.386499 | 6.415234 | 7.338210 |
| 8 C  | 2.042370 | 4.497993 | 5.627182 | 5.555498 | 6.435786 |
| 9 C  | 2.014318 | 4.088645 | 4.825126 | 5.187397 | 6.093273 |
| 10 H | 2.783867 | 4.839122 | 6.326112 | 5.351758 | 5.972239 |
| 11 H | 2.771980 | 4.533611 | 4.980053 | 5.794860 | 6.756511 |
| 12 C | 2.011509 | 3.576334 | 4.244981 | 4.264978 | 5.022686 |
| 13 H | 2.768316 | 3.626186 | 3.859769 | 4.136088 | 4.812156 |
| 14 C | 2.005370 | 3.693899 | 4.787306 | 4.061102 | 4.677574 |
| 15 H | 2.762211 | 3.845205 | 4.918339 | 3.728827 | 4.101793 |
| 16 C | 2.026035 | 4.273559 | 5.598914 | 4.934997 | 5.649991 |
| 17 S | 2.152654 | 2.297177 | 2.990155 | 4.018229 | 5.163808 |
| 18 S | 2.165549 | 2.283946 | 4.020017 | 2.938302 | 3.780689 |
| 19 C | 3.097724 | 2.077946 | 2.992400 | 3.603240 | 4.689966 |
| 20 C | 3.110283 | 2.060945 | 3.474290 | 3.088210 | 4.043141 |
| 21 H | 4.144829 | 2.876444 | 4.111874 | 3.482294 | 4.237773 |
| 22 H | 4.129173 | 2.879734 | 3.304896 | 4.280437 | 5.308723 |
|      | 6        | 7        | 8        | 9        | 10       |
| 6 O  | 0.000000 |          |          |          |          |
| 7 H  | 7.302723 | 0.000000 |          |          |          |
| 8 C  | 6.541903 | 1.080073 | 0.000000 |          |          |
| 9 C  | 5.585752 | 2.240172 | 1.424831 | 0.000000 |          |
| 10 H | 7.377464 | 2.689100 | 2.228846 | 3.334740 | 0.000000 |
| 11 H | 5.590880 | 2.695461 | 2.235458 | 1.080802 | 4.344983 |
| 12 C | 4.995219 | 3.354621 | 2.311167 | 1.420615 | 3.344306 |
| 13 H | 4.416620 | 4.363435 | 3.353655 | 2.234418 | 4.354164 |
| 14 C | 5.696693 | 3.350379 | 2.306042 | 2.294973 | 2.232757 |
| 15 H | 5.807269 | 4.358740 | 3.348221 | 3.339171 | 2.688030 |
| 16 C | 6.592598 | 2.232636 | 1.416498 | 2.289628 | 1.080742 |
| 17 S | 3.854570 | 3.958333 | 3.575969 | 3.150578 | 4.796026 |
| 18 S | 5.167006 | 4.332353 | 3.795546 | 4.160302 | 3.294074 |
| 19 C | 3.925339 | 5.158736 | 4.821708 | 4.675829 | 5.423906 |
| 20 C | 4.532575 | 5.307520 | 4.909142 | 5.023552 | 4.912268 |
| 21 H | 5.084287 | 6.263261 | 5.906198 | 6.090066 | 5.671732 |
| 22 H | 4.006870 | 6.043685 | 5.780765 | 5.555734 | 6.488039 |
|      | 11       | 12       | 13       | 14       | 15       |
| 11 H | 0.000000 |          |          |          |          |
| 12 C | 2.230126 | 0.000000 |          |          |          |
| 13 H | 2.686575 | 1.079262 | 0.000000 |          |          |
| 14 C | 3.338413 | 1.423605 | 2.237149 | 0.000000 |          |
| 15 H | 4.348775 | 2.236579 | 2.695973 | 1.079962 | 0.000000 |
| 16 C | 3.333525 | 2.301851 | 3.345682 | 1.424255 | 2.237387 |
| 17 S | 3.182198 | 3.503673 | 3.820648 | 4.051367 | 4.738886 |
| 18 S | 4.915129 | 3.898926 | 4.490248 | 3.280752 | 3.431875 |

|  |      |          |          |          |          |          |
|--|------|----------|----------|----------|----------|----------|
|  | 19 C | 4.880009 | 4.779232 | 5.068267 | 4.956227 | 5.383492 |
|  | 20 C | 5.491362 | 4.916725 | 5.305949 | 4.699809 | 4.922682 |
|  | 21 H | 6.573298 | 5.929366 | 6.289545 | 5.604361 | 5.700383 |
|  | 22 H | 5.611068 | 5.712533 | 5.904358 | 5.998013 | 6.421046 |
|  |      | 16       | 17       | 18       | 19       | 20       |
|  | 16 C | 0.000000 |          |          |          |          |
|  | 17 S | 4.090454 | 0.000000 |          |          |          |
|  | 18 S | 3.212651 | 3.090530 | 0.000000 |          |          |
|  | 19 C | 4.984999 | 1.743877 | 2.697757 | 0.000000 |          |
|  | 20 C | 4.700772 | 2.707847 | 1.747713 | 1.377742 | 0.000000 |
|  | 21 H | 5.595981 | 3.728939 | 2.448498 | 2.168509 | 1.082523 |
|  | 22 H | 6.041279 | 2.439035 | 3.720396 | 1.082844 | 2.164703 |
|  |      | 21       | 22       |          |          |          |
|  | 21 H | 0.000000 |          |          |          |          |
|  | 22 H | 2.556591 | 0.000000 |          |          |          |

**Table S4A.** Energy rank for all of the CpIrS<sub>2</sub>C<sub>2</sub>H<sub>2</sub>·Cr(CO)<sub>n</sub> optimized structures. PBE0/6-311G(d,p).

|     | name                                                   | E (a.u.)     | ΔE (kcal/mol) |
|-----|--------------------------------------------------------|--------------|---------------|
| 5-1 | 11-ir-Cr-CO-5-md2                                      | -2781.572821 | 0.0           |
| 5-2 | 12-ir-Cr-CO-5-md3                                      | -2781.563343 | 5.9           |
| 5-3 | 12-rh-Cr-CO-5-md3-freq-fneg2-fneg1-new-Cr-Ir-d-freq-ok | -2781.550056 | 14.3          |
|     |                                                        |              |               |
|     | name                                                   |              |               |
| 4-1 | 7-ir-Cr-CO-4-md1-r1                                    | -2668.327218 | 0.0           |
| 4-2 | 8-ir-Cr-CO-4-md2                                       | -2668.325741 | 0.9           |
| 4-3 | 9-ir-Cr-CO-4-md3-fneg1                                 | -2668.307465 | 12.4          |
|     |                                                        |              |               |
|     | name                                                   |              |               |
| 3-1 | 6-ir-Cr-CO-3-md3                                       | -2555.102274 | 0.0           |
|     |                                                        |              |               |
|     | name                                                   |              |               |
| 2-1 | 2-ir-Cr-CO-2-md2                                       | -2441.816596 | 0.0           |

**Table S4B.** Distance table for the lowest-lying CpIrS<sub>2</sub>C<sub>2</sub>H<sub>2</sub>·Cr(CO)<sub>n</sub> structures after PBE0/6-311G(d,p) optimization.

CpIrS<sub>2</sub>C<sub>2</sub>H<sub>2</sub>·Cr(CO)<sub>5</sub>

|                                                                                                              |          |          |          |          |          |          |  |
|--------------------------------------------------------------------------------------------------------------|----------|----------|----------|----------|----------|----------|--|
| 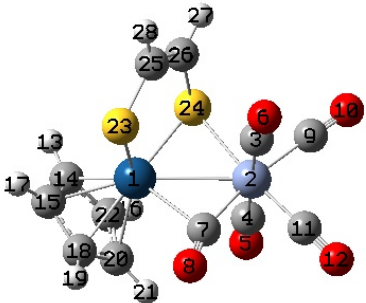 <p>1. -2781.572821 0.0</p> |          |          |          |          |          |          |  |
|                                                                                                              | 1        | 2        | 3        | 4        | 5        |          |  |
|                                                                                                              | 1 Ir     | 0.000000 |          |          |          |          |  |
|                                                                                                              | 2 Cr     | 2.824202 | 0.000000 |          |          |          |  |
|                                                                                                              | 3 C      | 3.638159 | 1.908331 | 0.000000 |          |          |  |
|                                                                                                              | 4 C      | 3.177204 | 1.878141 | 3.786322 | 0.000000 |          |  |
|                                                                                                              | 5 O      | 3.864274 | 3.023203 | 4.931231 | 1.145239 | 0.000000 |  |
|                                                                                                              | 6 O      | 4.526411 | 3.042356 | 1.138323 | 4.918561 | 6.062480 |  |
|                                                                                                              | 7 C      | 2.402144 | 1.914619 | 2.633097 | 2.766241 | 3.675716 |  |
|                                                                                                              | 8 O      | 3.135949 | 3.026422 | 3.460882 | 3.690497 | 4.441821 |  |
|                                                                                                              | 9 C      | 4.374136 | 1.892176 | 2.656574 | 2.676549 | 3.581109 |  |
|                                                                                                              | 10 O     | 5.422593 | 3.032234 | 3.541796 | 3.583095 | 4.306172 |  |
|                                                                                                              | 11 C     | 4.350893 | 1.840153 | 2.656654 | 2.609786 | 3.502641 |  |
|                                                                                                              | 12 O     | 5.390699 | 2.984831 | 3.555306 | 3.497351 | 4.191515 |  |
|                                                                                                              | 13 H     | 2.901409 | 5.381727 | 6.256518 | 5.133592 | 5.332719 |  |
|                                                                                                              | 14 C     | 2.167959 | 4.772725 | 5.751144 | 4.476510 | 4.689314 |  |
|                                                                                                              | 15 C     | 2.170910 | 4.949257 | 5.647504 | 4.964780 | 5.322497 |  |
|                                                                                                              | 16 H     | 2.961181 | 4.354953 | 5.923353 | 3.222484 | 2.955243 |  |
|                                                                                                              | 17 H     | 2.878051 | 5.645450 | 6.038963 | 5.902005 | 6.344225 |  |
|                                                                                                              | 18 C     | 2.211784 | 4.502038 | 5.381090 | 4.371863 | 4.682339 |  |
| 19 H                                                                                                         | 2.952788 | 4.905156 | 5.584727 | 4.945319 | 5.307829 |          |  |
| 20 C                                                                                                         | 2.238410 | 4.002087 | 5.336627 | 3.328589 | 3.402370 |          |  |
| 21 H                                                                                                         | 2.979410 | 3.987181 | 5.484639 | 3.037001 | 2.934806 |          |  |
| 22 C                                                                                                         | 2.221077 | 4.193564 | 5.573390 | 3.413241 | 3.406235 |          |  |
| 23 S                                                                                                         | 2.336141 | 3.783992 | 3.298131 | 5.003131 | 5.926717 |          |  |
| 24 S                                                                                                         | 2.312572 | 2.450946 | 3.153003 | 3.053350 | 3.864126 |          |  |
| 25 C                                                                                                         | 3.209553 | 3.899141 | 3.140601 | 5.265294 | 6.242072 |          |  |
| 26 C                                                                                                         | 3.230024 | 3.450860 | 3.097343 | 4.625284 | 5.549232 |          |  |
| 27 H                                                                                                         | 4.258031 | 4.145166 | 3.698536 | 5.272448 | 6.157690 |          |  |
| 28 H                                                                                                         | 4.245374 | 4.826982 | 3.747946 | 6.299286 | 7.300207 |          |  |
|                                                                                                              | 6        | 7        | 8        | 9        | 10       |          |  |
| 6 O                                                                                                          | 0.000000 |          |          |          |          |          |  |
| 7 C                                                                                                          | 3.534770 | 0.000000 |          |          |          |          |  |
| 8 O                                                                                                          | 4.156450 | 1.156811 | 0.000000 |          |          |          |  |
| 9 C                                                                                                          | 3.510126 | 3.784561 | 4.848467 | 0.000000 |          |          |  |
| 10 O                                                                                                         | 4.192308 | 4.917443 | 5.963286 | 1.140208 | 0.000000 |          |  |
| 11 C                                                                                                         | 3.505664 | 2.449267 | 3.075271 | 2.568937 | 3.451181 |          |  |
| 12 O                                                                                                         | 4.202546 | 3.282872 | 3.594909 | 3.462211 | 4.143147 |          |  |
| 13 H                                                                                                         | 7.064234 | 5.261181 | 5.871950 | 6.446912 | 7.268898 |          |  |
| 14 C                                                                                                         | 6.613587 | 4.397005 | 4.918115 | 6.064705 | 6.989612 |          |  |
| 15 C                                                                                                         | 6.393566 | 4.048093 | 4.276073 | 6.525814 | 7.555748 |          |  |
| 16 H                                                                                                         | 6.986816 | 4.471062 | 5.154896 | 5.301464 | 6.101529 |          |  |
| 17 H                                                                                                         | 6.632033 | 4.680256 | 4.814481 | 7.215226 | 8.236484 |          |  |
| 18 C                                                                                                         | 6.199742 | 3.242584 | 3.237905 | 6.248574 | 7.341943 |          |  |
| 19 H                                                                                                         | 6.300985 | 3.307554 | 2.924417 | 6.752518 | 7.879230 |          |  |

|  |    |   |          |          |          |          |          |
|--|----|---|----------|----------|----------|----------|----------|
|  | 20 | C | 6.324389 | 3.146653 | 3.411699 | 5.580732 | 6.618629 |
|  | 21 | H | 6.511230 | 3.106972 | 3.255477 | 5.525058 | 6.546031 |
|  | 22 | C | 6.581918 | 3.915545 | 4.478543 | 5.458164 | 6.383445 |
|  | 23 | S | 3.619093 | 3.290530 | 3.774452 | 5.142251 | 6.105861 |
|  | 24 | S | 4.026194 | 3.532173 | 4.627717 | 2.945943 | 3.722227 |
|  | 25 | C | 3.300055 | 4.221061 | 4.988288 | 4.639388 | 5.374791 |
|  | 26 | C | 3.504393 | 4.331832 | 5.309864 | 3.769685 | 4.378161 |
|  | 27 | H | 3.952527 | 5.278304 | 6.291468 | 3.982523 | 4.318478 |
|  | 28 | H | 3.581104 | 5.112064 | 5.785007 | 5.420875 | 6.050619 |
|  |    |   | 11       | 12       | 13       | 14       | 15       |
|  | 11 | C | 0.000000 |          |          |          |          |
|  | 12 | O | 1.144868 | 0.000000 |          |          |          |
|  | 13 | H | 7.030630 | 8.089356 | 0.000000 |          |          |
|  | 14 | C | 6.292101 | 7.300950 | 1.079781 | 0.000000 |          |
|  | 15 | C | 6.294818 | 7.228657 | 2.244246 | 1.432404 | 0.000000 |
|  | 16 | H | 5.640749 | 6.564893 | 2.717400 | 2.252166 | 3.361667 |
|  | 17 | H | 7.010355 | 7.943358 | 2.695186 | 2.239843 | 1.080491 |
|  | 18 | C | 5.510706 | 6.312602 | 3.363371 | 2.321056 | 1.427779 |
|  | 19 | H | 5.642363 | 6.312142 | 4.374888 | 3.365689 | 2.244459 |
|  | 20 | C | 4.970976 | 5.774370 | 3.354719 | 2.310425 | 2.306589 |
|  | 21 | H | 4.580977 | 5.231632 | 4.366148 | 3.354739 | 3.350345 |
|  | 22 | C | 5.511389 | 6.449071 | 2.254376 | 1.439338 | 2.316850 |
|  | 23 | S | 5.183069 | 6.165888 | 4.176294 | 3.802556 | 3.279861 |
|  | 24 | S | 4.278339 | 5.420874 | 3.708337 | 3.561716 | 4.192898 |
|  | 25 | C | 5.462580 | 6.510021 | 4.615811 | 4.559944 | 4.511302 |
|  | 26 | C | 5.149452 | 6.251049 | 4.458888 | 4.497486 | 4.839122 |
|  | 27 | H | 5.756944 | 6.826101 | 5.187022 | 5.368264 | 5.835758 |
|  | 28 | H | 6.265634 | 7.255730 | 5.464231 | 5.491872 | 5.349628 |
|  |    |   | 16       | 17       | 18       | 19       | 20       |
|  | 16 | H | 0.000000 |          |          |          |          |
|  | 17 | H | 4.372021 | 0.000000 |          |          |          |
|  | 18 | C | 3.362775 | 2.240089 | 0.000000 |          |          |
|  | 19 | H | 4.370121 | 2.704495 | 1.079673 | 0.000000 |          |
|  | 20 | C | 2.232181 | 3.352260 | 1.434792 | 2.247576 | 0.000000 |
|  | 21 | H | 2.683660 | 4.362982 | 2.243398 | 2.701119 | 1.080680 |
|  | 22 | C | 1.079976 | 3.360269 | 2.319669 | 3.361280 | 1.419336 |
|  | 23 | S | 5.206931 | 3.190956 | 3.672852 | 3.943050 | 4.357847 |
|  | 24 | S | 3.588885 | 4.760564 | 4.482907 | 5.252681 | 4.099417 |
|  | 25 | C | 5.678105 | 4.480292 | 5.072501 | 5.522917 | 5.443558 |
|  | 26 | C | 5.148860 | 5.047504 | 5.364752 | 5.988961 | 5.386745 |
|  | 27 | H | 5.863130 | 6.023841 | 6.411451 | 7.064357 | 6.352494 |
|  | 28 | H | 6.734280 | 5.146430 | 5.973804 | 6.337130 | 6.463224 |
|  |    |   | 21       | 22       | 23       | 24       | 25       |
|  | 21 | H | 0.000000 |          |          |          |          |
|  | 22 | C | 2.229247 | 0.000000 |          |          |          |
|  | 23 | S | 5.078536 | 4.434186 | 0.000000 |          |          |
|  | 24 | S | 4.613691 | 3.509629 | 3.194424 | 0.000000 |          |
|  | 25 | C | 6.140577 | 5.167175 | 1.727700 | 2.696724 | 0.000000 |
|  | 26 | C | 6.014333 | 4.884582 | 2.711485 | 1.753657 | 1.340855 |
|  | 27 | H | 6.951948 | 5.737366 | 3.725059 | 2.430044 | 2.139421 |

|                                                                                   |                                                               |
|-----------------------------------------------------------------------------------|---------------------------------------------------------------|
|                                                                                   | 28 H 7.173257 6.204711 2.401143 3.710113 1.086358<br>26 27 28 |
|                                                                                   | 26 C 0.000000                                                 |
|                                                                                   | 27 H 1.083780 0.000000                                        |
|                                                                                   | 28 H 2.117061 2.500312 0.000000                               |
| 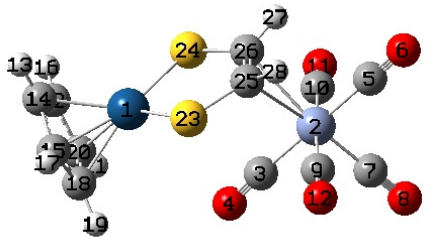 |                                                               |
| 2. -2781.563343 +5.9                                                              | 1 2 3 4 5                                                     |
|                                                                                   | 1 Ir 0.000000                                                 |
|                                                                                   | 2 Cr 4.556462 0.000000                                        |
|                                                                                   | 3 C 3.691894 1.891615 0.000000                                |
|                                                                                   | 4 O 3.645783 3.033053 1.142768 0.000000                       |
|                                                                                   | 5 C 5.900445 1.886993 3.778514 4.919999 0.000000              |
|                                                                                   | 6 O 6.850037 3.030117 4.921693 6.063001 1.143213              |
|                                                                                   | 7 C 6.111845 1.834396 2.651445 3.528150 2.633661              |
|                                                                                   | 8 O 7.152907 2.981836 3.552004 4.232097 3.530324              |
|                                                                                   | 9 C 4.979932 1.889439 2.659157 3.554451 2.685475              |
|                                                                                   | 10 C 4.982026 1.889475 2.659186 3.554508 2.685581             |
|                                                                                   | 11 O 5.572091 3.031224 3.551149 4.255864 3.593694             |
|                                                                                   | 12 O 5.569083 3.031195 3.551055 4.255703 3.593639             |
|                                                                                   | 13 H 2.900067 7.350294 6.588378 6.430263 8.450745             |
|                                                                                   | 14 C 2.167102 6.722949 5.758567 5.486977 8.003325             |
|                                                                                   | 15 C 2.198090 6.441816 5.320967 4.945498 7.844596             |
|                                                                                   | 16 H 2.936298 6.846055 5.839663 5.526514 8.153320             |
|                                                                                   | 17 H 2.936208 6.849482 5.845768 5.534374 8.154646             |
|                                                                                   | 18 C 2.171530 5.880234 4.449957 3.848219 7.501511             |
|                                                                                   | 19 H 2.903514 5.818429 4.249798 3.512380 7.523931             |
|                                                                                   | 20 C 2.171412 5.878765 4.447182 3.844389 7.500875             |
|                                                                                   | 21 H 2.903330 5.815605 4.244309 3.504473 7.522699             |
|                                                                                   | 22 C 2.198181 6.439935 5.317468 4.940894 7.843910             |
|                                                                                   | 23 S 2.255996 3.650352 3.461040 3.879808 4.651585             |
|                                                                                   | 24 S 2.255983 3.649412 3.458602 3.876869 4.651965             |
|                                                                                   | 25 C 3.196686 2.487846 3.161313 4.010614 3.065570             |
|                                                                                   | 26 C 3.196737 2.487298 3.160234 4.009463 3.065821             |
|                                                                                   | 27 H 4.199183 2.829624 3.912554 4.847780 2.780301             |
|                                                                                   | 28 H 4.199201 2.830176 3.913882 4.849288 2.779505             |
|                                                                                   | 6 7 8 9 10                                                    |
|                                                                                   | 6 O 0.000000                                                  |
|                                                                                   | 7 C 3.535112 0.000000                                         |
|                                                                                   | 8 O 4.240631 1.147440 0.000000                                |
|                                                                                   | 9 C 3.588671 2.575055 3.459355 0.000000                       |
|                                                                                   | 10 C 3.588838 2.575012 3.459281 3.775030 0.000000             |
|                                                                                   | 11 O 4.316187 3.446633 4.121173 4.913922 1.142472             |
|                                                                                   | 12 O 4.316055 3.446649 4.121221 1.142482 4.913924             |
|                                                                                   | 13 H 9.254327 8.986056 10.044762 7.648543                     |
|                                                                                   | 7.647934                                                      |
|                                                                                   | 14 C 8.895664 8.259586 9.276627 7.034070 7.034752             |
|                                                                                   | 15 C 8.792459 7.853506 8.816790 6.421549 7.074160             |
|                                                                                   | 16 H 9.055154 8.257505 9.217139 7.702006 6.543279             |
|                                                                                   | 17 H 9.055494 8.262218 9.222414 6.545590 7.706371             |
|                                                                                   | 18 C 8.543918 7.075307 7.948650 5.978407 6.421591             |
|                                                                                   | 19 H 8.599262 6.803296 7.582722 5.700216 6.537568             |

|  |    |   |          |          |          |          |          |
|--|----|---|----------|----------|----------|----------|----------|
|  | 20 | C | 8.543636 | 7.073358 | 7.946510 | 6.416477 | 5.980908 |
|  | 21 | H | 8.598694 | 6.799454 | 7.578472 | 6.530155 | 5.702751 |
|  | 22 | C | 8.792316 | 7.850935 | 8.813926 | 7.070649 | 6.421495 |
|  | 23 | S | 5.499666 | 5.277914 | 6.353843 | 3.379163 | 4.824211 |
|  | 24 | S | 5.500585 | 5.277024 | 6.352976 | 4.822219 | 3.379879 |
|  | 25 | C | 3.858942 | 4.280127 | 5.415556 | 2.749819 | 3.571779 |
|  | 26 | C | 3.859492 | 4.279701 | 5.415164 | 3.570785 | 2.750072 |
|  | 27 | H | 3.333258 | 4.462359 | 5.547815 | 4.089212 | 2.700176 |
|  | 28 | H | 3.331870 | 4.462735 | 5.548134 | 2.700978 | 4.089488 |
|  |    |   | 11       | 12       | 13       | 14       | 15       |
|  | 11 | O | 0.000000 |          |          |          |          |
|  | 12 | O | 6.050650 | 0.000000 |          |          |          |
|  | 13 | H | 8.076282 | 8.077214 | 0.000000 |          |          |
|  | 14 | C | 7.483891 | 7.482855 | 1.080188 | 0.000000 |          |
|  | 15 | C | 7.684169 | 6.702946 | 2.243540 | 1.433875 | 0.000000 |
|  | 16 | H | 6.652445 | 8.409006 | 2.699533 | 2.245143 | 3.369047 |
|  | 17 | H | 8.413799 | 6.654009 | 2.699566 | 2.245168 | 1.079738 |
|  | 18 | C | 6.997434 | 6.336817 | 3.348017 | 2.305094 | 1.422165 |
|  | 19 | H | 7.191617 | 5.940876 | 4.361923 | 3.351582 | 2.238608 |
|  | 20 | C | 6.341448 | 6.990591 | 3.347971 | 2.305048 | 2.319476 |
|  | 21 | H | 5.946465 | 7.182097 | 4.361877 | 3.351540 | 3.359777 |
|  | 22 | C | 6.703942 | 7.679888 | 2.243446 | 1.433795 | 2.326600 |
|  | 23 | S | 5.746418 | 3.744517 | 4.395280 | 3.954955 | 3.493741 |
|  | 24 | S | 3.746072 | 5.744112 | 4.392265 | 3.953177 | 4.415929 |
|  | 25 | C | 4.519635 | 3.478387 | 5.518809 | 5.149067 | 4.996582 |
|  | 26 | C | 3.478880 | 4.518604 | 5.517775 | 5.148504 | 5.307000 |
|  | 27 | H | 3.252749 | 5.069186 | 6.311339 | 6.040724 | 6.319953 |
|  | 28 | H | 5.069290 | 3.253624 | 6.313204 | 6.041760 | 5.842437 |
|  |    |   | 16       | 17       | 18       | 19       | 20       |
|  | 16 | H | 0.000000 |          |          |          |          |
|  | 17 | H | 4.377437 | 0.000000 |          |          |          |
|  | 18 | C | 3.365320 | 2.237905 | 0.000000 |          |          |
|  | 19 | H | 4.372001 | 2.702706 | 1.079998 | 0.000000 |          |
|  | 20 | C | 2.237900 | 3.365282 | 1.443091 | 2.249374 | 0.000000 |
|  | 21 | H | 2.702693 | 4.371971 | 2.249360 | 2.697852 | 1.080007 |
|  | 22 | C | 1.079737 | 3.369018 | 2.319537 | 3.359838 | 1.422208 |
|  | 23 | S | 5.148507 | 3.574111 | 3.654425 | 3.874637 | 4.228577 |
|  | 24 | S | 3.573079 | 5.147619 | 4.230008 | 4.847388 | 3.655828 |
|  | 25 | C | 5.783592 | 5.237446 | 4.984610 | 5.223245 | 5.179665 |
|  | 26 | C | 5.237023 | 5.783426 | 5.180409 | 5.568017 | 4.984960 |
|  | 27 | H | 5.938175 | 6.796513 | 6.226767 | 6.637926 | 5.930191 |
|  | 28 | H | 6.797330 | 5.938481 | 5.929423 | 6.107725 | 6.225913 |
|  |    |   | 21       | 22       | 23       | 24       | 25       |
|  | 21 | H | 0.000000 |          |          |          |          |
|  | 22 | C | 2.238661 | 0.000000 |          |          |          |
|  | 23 | S | 4.844994 | 4.416496 | 0.000000 |          |          |
|  | 24 | S | 3.877121 | 3.493223 | 3.136994 | 0.000000 |          |
|  | 25 | C | 5.566718 | 5.307101 | 1.742894 | 2.711452 | 0.000000 |
|  | 26 | C | 5.223801 | 4.996411 | 2.711495 | 1.742925 | 1.375315 |
|  | 27 | H | 6.109109 | 5.842307 | 3.693831 | 2.410158 | 2.147072 |

|                                                                                                                  |                                                               |
|------------------------------------------------------------------------------------------------------------------|---------------------------------------------------------------|
|                                                                                                                  | 28 H 6.636369 6.320447 2.410106 3.693902 1.083778<br>26 27 28 |
|                                                                                                                  | 26 C 0.000000                                                 |
|                                                                                                                  | 27 H 1.083776 0.000000                                        |
|                                                                                                                  | 28 H 2.147101 2.497906 0.000000                               |
| 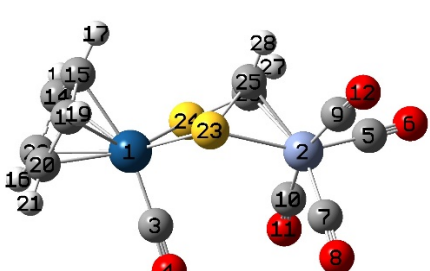 <p>3. -2781.550056 +14.3</p> | 1 2 3 4 5                                                     |
|                                                                                                                  | 1 Ir 0.000000                                                 |
|                                                                                                                  | 2 Cr 4.085003 0.000000                                        |
|                                                                                                                  | 3 C 1.863970 3.933314 0.000000                                |
|                                                                                                                  | 4 O 3.001310 4.299012 1.137943 0.000000                       |
|                                                                                                                  | 5 C 5.662798 1.823515 5.468558 5.701206 0.000000              |
|                                                                                                                  | 6 O 6.710417 2.973407 6.514955 6.699968 1.150556              |
|                                                                                                                  | 7 C 4.990787 1.851200 4.252386 4.200647 2.803129              |
|                                                                                                                  | 8 O 5.752239 2.996889 4.777674 4.502414 3.775865              |
|                                                                                                                  | 9 C 5.280888 1.873734 5.425543 5.847909 2.475944              |
|                                                                                                                  | 10 C 4.049899 1.877152 3.310772 3.371051 2.492644             |
|                                                                                                                  | 11 O 4.527895 3.018264 3.508075 3.319408 3.330485             |
|                                                                                                                  | 12 O 6.232315 3.017212 6.473072 6.901477 3.311447             |
|                                                                                                                  | 13 H 2.968756 6.325861 4.446384 5.461343 7.494933             |
|                                                                                                                  | 14 C 2.271604 6.021014 3.858902 4.914772 7.393761             |
|                                                                                                                  | 15 C 2.253917 5.608693 4.077751 5.198839 7.083608             |
|                                                                                                                  | 16 H 2.995807 6.924243 3.560554 4.258572 8.352497             |
|                                                                                                                  | 17 H 2.977946 5.618984 4.835041 5.970655 6.962621             |
|                                                                                                                  | 18 C 2.248795 5.710286 3.719361 4.740017 7.385588             |
|                                                                                                                  | 19 H 2.959470 5.789688 4.243259 5.188998 7.512823             |
| 20 C 2.252760 6.154058 3.212812 4.090449 7.835819                                                                |                                                               |
| 21 H 2.980871 6.615411 3.392538 4.031427 8.352357                                                                |                                                               |
| 22 C 2.257519 6.325905 3.300387 4.203265 7.830165                                                                |                                                               |
| 23 S 2.379545 2.464149 3.043691 3.875467 4.196973                                                                |                                                               |
| 24 S 2.375553 3.540650 3.031194 3.866005 4.470293                                                                |                                                               |
| 25 C 3.270886 2.087916 4.099964 4.922733 3.237604                                                                |                                                               |
| 26 C 3.261273 2.289972 3.890246 4.647228 3.033574                                                                |                                                               |
| 27 H 4.252544 2.908043 4.878759 5.576238 2.995429                                                                |                                                               |
| 28 H 4.149044 2.780072 5.132865 5.971690 3.586442                                                                |                                                               |
|                                                                                                                  | 6 7 8 9 10                                                    |
|                                                                                                                  | 6 O 0.000000                                                  |
|                                                                                                                  | 7 C 3.774791 0.000000                                         |
|                                                                                                                  | 8 O 4.614271 1.146243 0.000000                                |
|                                                                                                                  | 9 C 3.344537 2.504590 3.385422 0.000000                       |
|                                                                                                                  | 10 C 3.373859 2.527970 3.404666 3.711693 0.000000             |
|                                                                                                                  | 11 O 3.981700 3.390038 4.049488 4.831900 1.144080             |
|                                                                                                                  | 12 O 3.941828 3.375708 4.040823 1.145998 4.835921             |
|                                                                                                                  | 13 H 8.328555 7.647484 8.540040 7.457146 6.142747             |
|                                                                                                                  | 14 C 8.327509 7.180501 8.000932 7.077565 5.965008             |
|                                                                                                                  | 15 C 8.065339 6.759097 7.582117 6.328890 5.990890             |
|                                                                                                                  | 16 H 9.312420 7.686408 8.298408 8.264112 6.374608             |
|                                                                                                                  | 17 H 7.882747 6.933854 7.831802 6.106005 6.242597             |
|                                                                                                                  | 18 C 8.459023 6.496646 7.147455 6.361364 6.127164             |
|                                                                                                                  | 19 H 8.607958 6.423633 6.999263 6.149226 6.470662             |
|                                                                                                                  | 20 C 8.914860 6.760752 7.310714 7.105200 6.166654             |



|  |    |   |          |          |          |          |          |
|--|----|---|----------|----------|----------|----------|----------|
|  | 21 | H | 9.459271 | 6.943437 | 7.335077 | 7.554142 | 6.563333 |
|  | 22 | C | 8.826829 | 7.168082 | 7.831476 | 7.507884 | 6.053953 |
|  | 23 | S | 5.311593 | 3.387580 | 4.248020 | 3.062042 | 3.491778 |
|  | 24 | S | 5.280577 | 4.978920 | 5.969798 | 5.043256 | 3.087312 |
|  | 25 | C | 4.191453 | 3.758581 | 4.849370 | 2.634388 | 3.296124 |
|  | 26 | C | 3.862254 | 4.067406 | 5.187758 | 3.495806 | 2.673890 |
|  | 27 | H | 3.530431 | 4.722508 | 5.858470 | 3.910504 | 3.199648 |
|  | 28 | H | 4.389247 | 4.380779 | 5.446102 | 2.612599 | 4.226957 |
|  |    |   | 11       | 12       | 13       | 14       | 15       |
|  | 11 | O | 0.000000 |          |          |          |          |
|  | 12 | O | 5.942226 | 0.000000 |          |          |          |
|  | 13 | H | 6.402301 | 8.333171 | 0.000000 |          |          |
|  | 14 | C | 6.311101 | 7.932792 | 1.080368 | 0.000000 |          |
|  | 15 | C | 6.571455 | 7.051999 | 2.230760 | 1.422508 | 0.000000 |
|  | 16 | H | 6.400084 | 9.228063 | 2.688352 | 2.235281 | 3.354005 |
|  | 17 | H | 6.929033 | 6.720603 | 2.687607 | 2.236152 | 1.079256 |
|  | 18 | C | 6.720823 | 7.055668 | 3.348962 | 2.305371 | 1.435884 |
|  | 19 | H | 7.179188 | 6.707997 | 4.359214 | 3.349225 | 2.246638 |
|  | 20 | C | 6.543792 | 7.919141 | 3.351657 | 2.307419 | 2.311948 |
|  | 21 | H | 6.884544 | 8.353274 | 4.363025 | 3.351654 | 3.356529 |
|  | 22 | C | 6.270453 | 8.414126 | 2.230872 | 1.421500 | 2.311325 |
|  | 23 | S | 4.454282 | 3.913734 | 4.847141 | 4.240242 | 3.495307 |
|  | 24 | S | 3.419738 | 6.088154 | 3.187445 | 3.297366 | 3.639339 |
|  | 25 | C | 4.310757 | 3.498518 | 4.901829 | 4.654458 | 4.033258 |
|  | 26 | C | 3.469797 | 4.481304 | 4.513221 | 4.507812 | 4.310203 |
|  | 27 | H | 3.865738 | 4.788877 | 5.015330 | 5.205346 | 5.080320 |
|  | 28 | H | 5.268974 | 3.163259 | 5.466617 | 5.256415 | 4.454135 |
|  |    |   | 16       | 17       | 18       | 19       | 20       |
|  | 16 | H | 0.000000 |          |          |          |          |
|  | 17 | H | 4.362190 | 0.000000 |          |          |          |
|  | 18 | C | 3.354785 | 2.249867 | 0.000000 |          |          |
|  | 19 | H | 4.366779 | 2.708279 | 1.080342 | 0.000000 |          |
|  | 20 | C | 2.253324 | 3.354751 | 1.417830 | 2.230038 | 0.000000 |
|  | 21 | H | 2.714454 | 4.366144 | 2.230740 | 2.685499 | 1.080408 |
|  | 22 | C | 1.079821 | 3.353525 | 2.311262 | 3.356090 | 1.439152 |
|  | 23 | S | 5.355667 | 3.599636 | 3.363323 | 3.333834 | 4.048142 |
|  | 24 | S | 4.252646 | 3.874547 | 4.349947 | 5.060597 | 4.461203 |
|  | 25 | C | 6.127399 | 3.777017 | 4.479135 | 4.611298 | 5.253179 |
|  | 26 | C | 5.799968 | 4.189803 | 4.953090 | 5.350293 | 5.452597 |
|  | 27 | H | 6.576532 | 4.822762 | 5.885746 | 6.303991 | 6.411758 |
|  | 28 | H | 6.946656 | 3.949165 | 4.974106 | 4.967408 | 5.943531 |
|  |    |   | 21       | 22       | 23       | 24       | 25       |
|  | 21 | H | 0.000000 |          |          |          |          |
|  | 22 | C | 2.251387 | 0.000000 |          |          |          |
|  | 23 | S | 4.569960 | 4.525801 | 0.000000 |          |          |
|  | 24 | S | 5.255437 | 3.847904 | 3.229461 | 0.000000 |          |
|  | 25 | C | 5.976191 | 5.340739 | 1.769147 | 2.787731 | 0.000000 |
|  | 26 | C | 6.218395 | 5.197623 | 2.657788 | 1.787680 | 1.387250 |
|  | 27 | H | 7.225565 | 6.025672 | 3.679672 | 2.395187 | 2.137710 |
|  | 28 | H | 6.700616 | 6.088393 | 2.488128 | 3.692955 | 1.082867 |

|      |          |          |          |
|------|----------|----------|----------|
|      | 26       | 27       | 28       |
| 26 C | 0.000000 |          |          |
| 27 H | 1.087657 | 0.000000 |          |
| 28 H | 2.199066 | 2.551992 | 0.000000 |

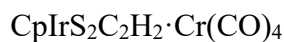

|                                                                                                              |          |          |          |          |          |          |
|--------------------------------------------------------------------------------------------------------------|----------|----------|----------|----------|----------|----------|
| 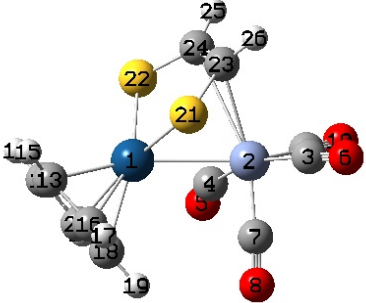 <p>1. -2668.327218 0.0</p> | 1        | 2        | 3        | 4        | 5        |          |
|                                                                                                              | 1 Ir     | 0.000000 |          |          |          |          |
|                                                                                                              | 2 Cr     | 2.747092 | 0.000000 |          |          |          |
|                                                                                                              | 3 C      | 4.375788 | 1.879924 | 0.000000 |          |          |
|                                                                                                              | 4 C      | 2.352631 | 1.890968 | 3.703003 | 0.000000 |          |
|                                                                                                              | 5 O      | 3.103657 | 3.006954 | 4.736306 | 1.161664 | 0.000000 |
|                                                                                                              | 6 O      | 5.455315 | 3.021035 | 1.143061 | 4.816959 | 5.812933 |
|                                                                                                              | 7 C      | 3.420207 | 1.813537 | 2.473037 | 2.453556 | 3.236493 |
|                                                                                                              | 8 O      | 4.178680 | 2.965204 | 3.356773 | 3.309396 | 3.845575 |
|                                                                                                              | 9 C      | 4.218574 | 1.840733 | 2.510231 | 2.413058 | 3.066074 |
|                                                                                                              | 10 O     | 5.232426 | 2.984408 | 3.404283 | 3.245269 | 3.592635 |
|                                                                                                              | 11 H     | 2.914818 | 5.594628 | 7.281082 | 4.616968 | 4.738729 |
|                                                                                                              | 12 C     | 2.194148 | 4.899586 | 6.535302 | 4.022277 | 4.255067 |
|                                                                                                              | 13 C     | 2.200142 | 4.759158 | 6.109592 | 4.421200 | 4.951778 |
|                                                                                                              | 14 H     | 2.943228 | 4.832347 | 6.616966 | 3.292129 | 2.926969 |
|                                                                                                              | 15 H     | 2.944381 | 5.383410 | 6.569562 | 5.276982 | 5.890903 |
|                                                                                                              | 16 C     | 2.208146 | 4.177248 | 5.377619 | 3.993128 | 4.581712 |
|                                                                                                              | 17 H     | 2.949751 | 4.368773 | 5.213048 | 4.582869 | 5.293012 |
|                                                                                                              | 18 C     | 2.218712 | 3.968287 | 5.412832 | 3.240613 | 3.544628 |
|                                                                                                              | 19 H     | 2.946705 | 3.955173 | 5.253388 | 3.249236 | 3.458583 |
|                                                                                                              | 20 C     | 2.211047 | 4.447169 | 6.148842 | 3.256594 | 3.274566 |
|                                                                                                              | 21 S     | 2.315484 | 2.274193 | 2.990940 | 3.413561 | 4.530431 |
|                                                                                                              | 22 S     | 2.355878 | 3.592523 | 5.211450 | 3.006159 | 3.481458 |
|                                                                                                              | 23 C     | 3.132116 | 2.393280 | 3.124563 | 3.411148 | 4.433239 |
|                                                                                                              | 24 C     | 3.124286 | 3.056639 | 4.230557 | 3.306614 | 4.077670 |
|                                                                                                              | 25 H     | 4.174564 | 3.876912 | 4.862749 | 4.078706 | 4.706151 |
| 26 H                                                                                                         | 4.177508 | 2.995644 | 3.096725 | 4.287664 | 5.310011 |          |
|                                                                                                              | 6        | 7        | 8        | 9        | 10       |          |
| 6 O                                                                                                          | 0.000000 |          |          |          |          |          |
| 7 C                                                                                                          | 3.317388 | 0.000000 |          |          |          |          |
| 8 O                                                                                                          | 3.971524 | 1.152549 | 0.000000 |          |          |          |
| 9 C                                                                                                          | 3.382343 | 2.816619 | 3.798604 | 0.000000 |          |          |
| 10 O                                                                                                         | 4.067915 | 3.796252 | 4.651405 | 1.144701 | 0.000000 |          |
| 11 H                                                                                                         | 8.359784 | 6.129648 | 6.665887 | 6.789271 | 7.631265 |          |
| 12 C                                                                                                         | 7.592310 | 5.231031 | 5.693600 | 6.237271 | 7.158369 |          |
| 13 C                                                                                                         | 7.061901 | 5.019760 | 5.449415 | 6.375262 | 7.415800 |          |
| 14 H                                                                                                         | 7.710556 | 4.770313 | 5.046080 | 5.700238 | 6.429896 |          |
| 15 H                                                                                                         | 7.453589 | 5.799065 | 6.275235 | 7.049460 | 8.104361 |          |
| 16 C                                                                                                         | 6.270643 | 3.977662 | 4.213535 | 5.859080 | 6.939688 |          |
| 17 H                                                                                                         | 5.959214 | 3.984278 | 4.098221 | 6.138387 | 7.257756 |          |
| 18 C                                                                                                         | 6.386998 | 3.521471 | 3.651485 | 5.375628 | 6.358305 |          |
| 19 H                                                                                                         | 6.161131 | 3.040957 | 2.884882 | 5.208260 | 6.142931 |          |
| 20 C                                                                                                         | 7.218570 | 4.417729 | 4.730938 | 5.627193 | 6.500055 |          |

|  |    |   |          |          |          |          |          |
|--|----|---|----------|----------|----------|----------|----------|
|  | 21 | S | 3.870782 | 3.461914 | 4.417660 | 3.906285 | 4.982080 |
|  | 22 | S | 6.294398 | 4.966099 | 5.943510 | 4.297420 | 4.990533 |
|  | 23 | C | 4.007678 | 4.142450 | 5.268088 | 3.236880 | 4.076374 |
|  | 24 | C | 5.193957 | 4.791289 | 5.909264 | 3.543980 | 4.196343 |
|  | 25 | H | 5.732025 | 5.649060 | 6.783465 | 3.926520 | 4.316582 |
|  | 26 | H | 3.727035 | 4.703333 | 5.819659 | 3.531522 | 4.225932 |
|  |    |   | 11       | 12       | 13       | 14       | 15       |
|  | 11 | H | 0.000000 |          |          |          |          |
|  | 12 | C | 1.080712 | 0.000000 |          |          |          |
|  | 13 | C | 2.236095 | 1.427757 | 0.000000 |          |          |
|  | 14 | H | 2.702108 | 2.245662 | 3.365659 | 0.000000 |          |
|  | 15 | H | 2.693316 | 2.241259 | 1.079493 | 4.374917 | 0.000000 |
|  | 16 | C | 3.354608 | 2.310098 | 1.439375 | 3.358456 | 2.254718 |
|  | 17 | H | 4.366849 | 3.355119 | 2.251910 | 4.367317 | 2.717399 |
|  | 18 | C | 3.352085 | 2.307451 | 2.317447 | 2.245016 | 3.361335 |
|  | 19 | H | 4.363984 | 3.352389 | 3.361093 | 2.702773 | 4.371916 |
|  | 20 | C | 2.240006 | 1.429841 | 2.322182 | 1.079625 | 3.364753 |
|  | 21 | S | 4.871785 | 4.258338 | 3.643860 | 5.230480 | 3.848292 |
|  | 22 | S | 3.326401 | 3.372612 | 3.893880 | 3.954743 | 4.296032 |
|  | 23 | C | 5.448757 | 5.092484 | 4.881096 | 5.777371 | 5.104232 |
|  | 24 | C | 4.881422 | 4.759451 | 4.904193 | 5.332712 | 5.177855 |
|  | 25 | H | 5.670729 | 5.680068 | 5.919049 | 6.150644 | 6.148042 |
|  | 26 | H | 6.495631 | 6.147730 | 5.843442 | 6.842624 | 5.976412 |
|  |    |   | 16       | 17       | 18       | 19       | 20       |
|  | 16 | C | 0.000000 |          |          |          |          |
|  | 17 | H | 1.080235 | 0.000000 |          |          |          |
|  | 18 | C | 1.423420 | 2.234261 | 0.000000 |          |          |
|  | 19 | H | 2.233283 | 2.685544 | 1.080604 | 0.000000 |          |
|  | 20 | C | 2.315895 | 3.358813 | 1.432252 | 2.243926 | 0.000000 |
|  | 21 | S | 3.479495 | 3.537762 | 4.036672 | 4.496315 | 4.476336 |
|  | 22 | S | 4.459890 | 5.227325 | 4.363550 | 5.053244 | 3.708708 |
|  | 23 | C | 4.938251 | 5.196795 | 5.186963 | 5.610312 | 5.277362 |
|  | 24 | C | 5.224276 | 5.730266 | 5.285752 | 5.812232 | 5.004561 |
|  | 25 | H | 6.300298 | 6.817841 | 6.311783 | 6.814125 | 5.933497 |
|  | 26 | H | 5.851523 | 5.980413 | 6.165941 | 6.523505 | 6.340741 |
|  |    |   | 21       | 22       | 23       | 24       | 25       |
|  | 21 | S | 0.000000 |          |          |          |          |
|  | 22 | S | 3.257898 | 0.000000 |          |          |          |
|  | 23 | C | 1.773689 | 2.725254 | 0.000000 |          |          |
|  | 24 | C | 2.735999 | 1.700443 | 1.366723 | 0.000000 |          |
|  | 25 | H | 3.728887 | 2.387141 | 2.118967 | 1.088115 | 0.000000 |
|  | 26 | H | 2.452158 | 3.707611 | 1.083715 | 2.133338 | 2.447751 |
|  |    |   | 26       |          |          |          |          |
|  | 26 | H | 0.000000 |          |          |          |          |

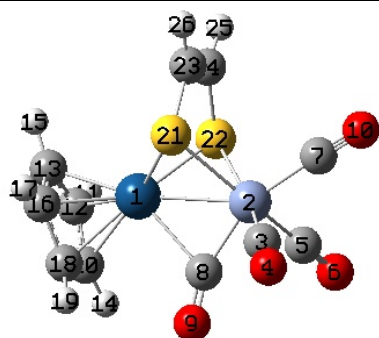

2. -2668.325741 +0.9

|      | 1        | 2        | 3        | 4        | 5        |
|------|----------|----------|----------|----------|----------|
| 1 Ir | 0.000000 |          |          |          |          |
| 2 Cr | 2.625240 | 0.000000 |          |          |          |
| 3 C  | 3.809414 | 1.830263 | 0.000000 |          |          |
| 4 O  | 4.747204 | 2.977033 | 1.147107 | 0.000000 |          |
| 5 C  | 3.809983 | 1.830297 | 2.774196 | 3.731732 | 0.000000 |
| 6 O  | 4.747992 | 2.977068 | 3.731652 | 4.545343 | 1.147104 |
| 7 C  | 4.313843 | 1.894822 | 2.516296 | 3.400759 | 2.516359 |
| 8 C  | 2.277192 | 1.870426 | 2.385263 | 3.225967 | 2.385047 |
| 9 O  | 3.078578 | 2.985237 | 3.073915 | 3.620976 | 3.073545 |
| 10 O | 5.408540 | 3.033790 | 3.386039 | 4.057170 | 3.386177 |
| 11 H | 2.908053 | 5.045452 | 6.505675 | 7.489610 | 5.499097 |
| 12 C | 2.192754 | 4.624379 | 5.890983 | 6.798555 | 5.321959 |
| 13 C | 2.198583 | 4.789992 | 5.911342 | 6.751428 | 5.912141 |
| 14 H | 2.953812 | 4.624595 | 5.511910 | 6.263509 | 4.783105 |
| 15 H | 2.940526 | 5.359313 | 6.565036 | 7.430248 | 6.565865 |
| 16 C | 2.192789 | 4.624277 | 5.320928 | 5.979032 | 5.891449 |
| 17 H | 2.908206 | 5.045411 | 5.497978 | 6.022912 | 6.506056 |
| 18 C | 2.214852 | 4.372944 | 4.928047 | 5.536462 | 5.317843 |
| 19 H | 2.953874 | 4.624562 | 4.782318 | 5.189010 | 5.512201 |
| 20 C | 2.214817 | 4.372982 | 5.317389 | 6.098199 | 4.928826 |
| 21 S | 2.377225 | 2.481790 | 3.158940 | 3.956563 | 4.289979 |
| 22 S | 2.377325 | 2.482049 | 4.290134 | 5.427700 | 3.159546 |
| 23 C | 3.244203 | 3.309122 | 4.454850 | 5.360794 | 4.850129 |
| 24 C | 3.244223 | 3.309183 | 4.850126 | 5.896120 | 4.455061 |
| 25 H | 4.220822 | 4.251117 | 5.819026 | 6.866092 | 5.173453 |
| 26 H | 4.220777 | 4.251021 | 5.173206 | 5.959210 | 5.818930 |
|      | 6        | 7        | 8        | 9        | 10       |
| 6 O  | 0.000000 |          |          |          |          |
| 7 C  | 3.400836 | 0.000000 |          |          |          |
| 8 C  | 3.225677 | 3.691160 | 0.000000 |          |          |
| 9 O  | 3.620408 | 4.711899 | 1.164910 | 0.000000 |          |
| 10 O | 4.057357 | 1.139606 | 4.805797 | 5.787572 | 0.000000 |
| 11 H | 6.024657 | 6.561137 | 4.478614 | 4.859840 | 7.571807 |
| 12 C | 5.980552 | 6.279580 | 3.888617 | 4.239793 | 7.345808 |
| 13 C | 6.752632 | 6.335855 | 4.318054 | 4.817892 | 7.364765 |
| 14 H | 5.190211 | 6.459073 | 3.152197 | 2.880463 | 7.577145 |
| 15 H | 7.431519 | 6.698338 | 5.185784 | 5.798020 | 7.644080 |
| 16 C | 6.799287 | 6.279323 | 3.888731 | 4.239991 | 7.345462 |
| 17 H | 7.490185 | 6.560821 | 4.478902 | 4.860238 | 7.571326 |
| 18 C | 6.098874 | 6.210843 | 3.113369 | 3.132107 | 7.336185 |
| 19 H | 6.263924 | 6.458865 | 3.152470 | 2.880926 | 7.576836 |
| 20 C | 5.537615 | 6.210972 | 3.113259 | 3.131929 | 7.336367 |
| 21 S | 5.427590 | 3.335168 | 3.346834 | 4.375405 | 4.212859 |
| 22 S | 3.957354 | 3.335919 | 3.346462 | 4.374877 | 4.213790 |
| 23 C | 5.896201 | 3.529262 | 4.579588 | 5.700487 | 4.138175 |
| 24 C | 5.361145 | 3.529545 | 4.579453 | 5.700296 | 4.138564 |
| 25 H | 5.959624 | 4.187080 | 5.566275 | 6.675344 | 4.586936 |
| 26 H | 6.866047 | 4.186627 | 5.566477 | 6.675644 | 4.586273 |
|      | 11       | 12       | 13       | 14       | 15       |

|                                                                                                                  |                                                                                                                                                                                                                                                                                                                                                                                                                                                                                                                                                                                                                                                                                                                                                                                                                                                                                                                                                                                                                                                                                                                                                                                                                                                                                                                                                                                                                                                                                                                                                                                                |
|------------------------------------------------------------------------------------------------------------------|------------------------------------------------------------------------------------------------------------------------------------------------------------------------------------------------------------------------------------------------------------------------------------------------------------------------------------------------------------------------------------------------------------------------------------------------------------------------------------------------------------------------------------------------------------------------------------------------------------------------------------------------------------------------------------------------------------------------------------------------------------------------------------------------------------------------------------------------------------------------------------------------------------------------------------------------------------------------------------------------------------------------------------------------------------------------------------------------------------------------------------------------------------------------------------------------------------------------------------------------------------------------------------------------------------------------------------------------------------------------------------------------------------------------------------------------------------------------------------------------------------------------------------------------------------------------------------------------|
|                                                                                                                  | 11 H 0.000000<br>12 C 1.080606 0.000000<br>13 C 2.241389 1.433206 0.000000<br>14 H 2.691126 2.238554 3.366725 0.000000<br>15 H 2.704706 2.249491 1.079093 4.376310 0.000000<br>16 C 3.347490 2.302888 1.433184 3.353190 2.249479<br>17 H 4.358875 3.347497 2.241370 4.363420 2.704696<br>18 C 3.353726 2.309893 2.323129 2.248543 3.365837<br>19 H 4.363400 3.353164 3.366661 2.706525 4.376245<br>20 C 2.232094 1.423231 2.323155 1.079726 3.365853<br>21 S 5.029562 4.383491 3.776637 5.260824 4.027249<br>22 S 3.473053 3.496166 3.776875 4.410965 4.027608<br>23 C 5.135886 4.802216 4.193707 6.140852 4.049253<br>24 C 4.538754 4.473166 4.193800 5.841401 4.049412<br>25 H 5.025611 5.148225 4.908410 6.638158 4.595907<br>26 H 6.033805 5.691642 4.908238 7.140744 4.595620<br>16 17 18 19 20<br>16 C 0.000000<br>17 H 1.080608 0.000000<br>18 C 1.423256 2.232142 0.000000<br>19 H 2.238486 2.691046 1.079723 0.000000<br>20 C 2.309948 3.353787 1.437373 2.248608 0.000000<br>21 S 3.496236 3.473403 4.005039 4.411341 4.517062<br>22 S 4.383738 5.030044 4.517091 5.260879 4.004815<br>23 C 4.473396 4.539342 5.202409 5.841725 5.382240<br>24 C 4.802501 5.136505 5.382365 6.141049 5.202203<br>25 H 5.691983 6.034494 6.326306 7.140936 6.028497<br>26 H 5.148434 5.026203 6.028719 6.638521 6.326175<br>21 22 23 24 25<br>21 S 0.000000<br>22 S 3.036472 0.000000<br>23 C 1.779611 2.681776 0.000000<br>24 C 2.681730 1.779629 1.325469 0.000000<br>25 H 3.720021 2.463866 2.136903 1.084194 0.000000<br>26 H 2.463851 3.720071 1.084194 2.136923 2.558279<br>26<br>26 H 0.000000 |
| 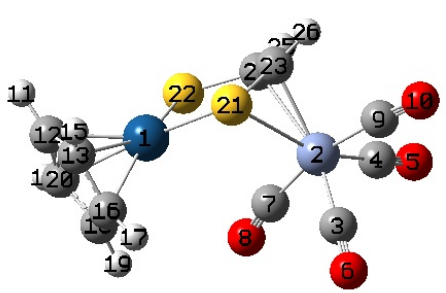 <p>3. -2668.307465 +12.4</p> | 1 2 3 4 5<br>1 Ir 0.000000<br>2 Cr 3.792542 0.000000<br>3 C 4.633817 1.834976 0.000000<br>4 C 5.335838 1.818304 2.704447 0.000000<br>5 O 6.379727 2.968910 3.656767 1.151022 0.000000<br>6 O 5.385750 2.983671 1.149272 3.661813 4.462168<br>7 C 3.423575 1.878978 2.520362 2.524766 3.406832<br>8 O 3.805418 3.020108 3.357909 3.364773 4.020539<br>9 C 5.160441 1.874954 2.508801 2.499883 3.377268<br>10 O 6.175616 3.018570 3.368747 3.345991 3.993978<br>11 H 2.889095 6.628500 7.494205 8.106657 9.093377<br>12 C 2.156343 5.945644 6.635316 7.465121 8.478884                                                                                                                                                                                                                                                                                                                                                                                                                                                                                                                                                                                                                                                                                                                                                                                                                                                                                                                                                                                                                           |

|  |    |   |          |          |          |          |          |  |  |
|--|----|---|----------|----------|----------|----------|----------|--|--|
|  | 13 | C | 2.189798 | 5.617996 | 6.019128 | 7.306623 | 8.399282 |  |  |
|  | 14 | H | 2.928219 | 6.120165 | 6.836038 | 7.248871 | 8.084910 |  |  |
|  | 15 | H | 2.932318 | 6.063902 | 6.440724 | 7.825892 | 8.948381 |  |  |
|  | 16 | C | 2.194811 | 5.041776 | 5.112488 | 6.670837 | 7.747063 |  |  |
|  | 17 | H | 2.931281 | 4.994747 | 4.707034 | 6.645495 | 7.735590 |  |  |
|  | 18 | C | 2.163164 | 5.035475 | 5.255674 | 6.425322 | 7.401549 |  |  |
|  | 19 | H | 2.886139 | 4.981403 | 4.992945 | 6.173635 | 7.071168 |  |  |
|  | 20 | C | 2.193074 | 5.660639 | 6.257628 | 6.993760 | 7.930954 |  |  |
|  | 21 | S | 2.290545 | 2.642372 | 3.576306 | 4.390460 | 5.513467 |  |  |
|  | 22 | S | 2.245604 | 3.540098 | 5.010621 | 4.476726 | 5.291872 |  |  |
|  | 23 | C | 3.223020 | 2.174443 | 3.800808 | 3.430213 | 4.414661 |  |  |
|  | 24 | C | 3.174525 | 2.445111 | 4.225600 | 3.245992 | 4.080531 |  |  |
|  | 25 | H | 4.197194 | 3.047964 | 4.870388 | 3.262105 | 3.831200 |  |  |
|  | 26 | H | 4.219034 | 2.760109 | 4.289886 | 3.732789 | 4.601723 |  |  |
|  |    |   | 6        | 7        | 8        | 9        | 10       |  |  |
|  | 6  | O | 0.000000 |          |          |          |          |  |  |
|  | 7  | C | 3.391364 | 0.000000 |          |          |          |  |  |
|  | 8  | O | 3.998771 | 1.146734 | 0.000000 |          |          |  |  |
|  | 9  | C | 3.396037 | 3.727851 | 4.848723 | 0.000000 |          |  |  |
|  | 10 | O | 4.037272 | 4.855799 | 5.963340 | 1.146445 | 0.000000 |  |  |
|  | 11 | H | 8.165732 | 6.173262 | 6.303881 | 7.850068 | 8.772381 |  |  |
|  | 12 | C | 7.236314 | 5.391525 | 5.490067 | 7.251903 | 8.213839 |  |  |
|  | 13 | C | 6.485337 | 5.327451 | 5.582843 | 6.724876 | 7.608379 |  |  |
|  | 14 | H | 7.450980 | 4.942635 | 4.602795 | 7.784777 | 8.876713 |  |  |
|  | 15 | H | 6.877508 | 6.063338 | 6.450537 | 6.909554 | 7.675726 |  |  |
|  | 16 | C | 5.436972 | 4.519182 | 4.661994 | 6.299489 | 7.241939 |  |  |
|  | 17 | H | 4.837690 | 4.638460 | 4.854949 | 6.085163 | 6.954811 |  |  |
|  | 18 | C | 5.661564 | 4.019144 | 3.853358 | 6.598933 | 7.652932 |  |  |
|  | 19 | H | 5.298039 | 3.673980 | 3.263257 | 6.652410 | 7.734941 |  |  |
|  | 20 | C | 6.824811 | 4.682901 | 4.517957 | 7.224873 | 8.283028 |  |  |
|  | 21 | S | 4.431261 | 3.505329 | 4.429863 | 3.277999 | 4.124759 |  |  |
|  | 22 | S | 6.018048 | 3.080284 | 3.453870 | 5.002661 | 6.044639 |  |  |
|  | 23 | C | 4.885416 | 3.339913 | 4.365945 | 2.679808 | 3.539582 |  |  |
|  | 24 | C | 5.352604 | 2.897080 | 3.724827 | 3.520570 | 4.480650 |  |  |
|  | 25 | H | 6.015795 | 3.499693 | 4.242900 | 3.883060 | 4.723000 |  |  |
|  | 26 | H | 5.342143 | 4.233581 | 5.306759 | 2.506061 | 3.056698 |  |  |
|  |    |   | 11       | 12       | 13       | 14       | 15       |  |  |
|  | 11 | H | 0.000000 |          |          |          |          |  |  |
|  | 12 | C | 1.080187 | 0.000000 |          |          |          |  |  |
|  | 13 | C | 2.250041 | 1.442509 | 0.000000 |          |          |  |  |
|  | 14 | H | 2.702488 | 2.243706 | 3.373535 | 0.000000 |          |  |  |
|  | 15 | H | 2.704089 | 2.251959 | 1.079756 | 4.381188 | 0.000000 |  |  |
|  | 16 | C | 3.352120 | 2.310488 | 1.419026 | 3.369443 | 2.236076 |  |  |
|  | 17 | H | 4.366526 | 3.357624 | 2.235855 | 4.375676 | 2.701434 |  |  |
|  | 18 | C | 3.345232 | 2.300423 | 2.310882 | 2.241334 | 3.357329 |  |  |
|  | 19 | H | 4.356795 | 3.344956 | 3.352686 | 2.697759 | 4.366068 |  |  |
|  | 20 | C | 2.239345 | 1.427703 | 2.328558 | 1.079632 | 3.369594 |  |  |
|  | 21 | S | 4.684079 | 4.134578 | 3.584632 | 5.208214 | 3.734551 |  |  |
|  | 22 | S | 4.069099 | 3.760342 | 4.324854 | 3.524321 | 5.007336 |  |  |
|  | 23 | C | 5.560361 | 5.180709 | 5.014732 | 5.806111 | 5.262374 |  |  |

|  |      |          |          |          |          |          |
|--|------|----------|----------|----------|----------|----------|
|  | 24 C | 5.419807 | 5.080607 | 5.262766 | 5.196958 | 5.731533 |
|  | 25 H | 6.245878 | 6.000821 | 6.294728 | 5.927325 | 6.761603 |
|  | 26 H | 6.373133 | 6.078884 | 5.844361 | 6.837164 | 5.942717 |
|  |      | 16       | 17       | 18       | 19       | 20       |
|  | 16 C | 0.000000 |          |          |          |          |
|  | 17 H | 1.080044 | 0.000000 |          |          |          |
|  | 18 C | 1.438404 | 2.246153 | 0.000000 |          |          |
|  | 19 H | 2.247219 | 2.697754 | 1.080639 | 0.000000 |          |
|  | 20 C | 2.325824 | 3.366444 | 1.427952 | 2.239273 | 0.000000 |
|  | 21 S | 3.561287 | 3.679015 | 4.097241 | 4.606912 | 4.462746 |
|  | 22 S | 4.358455 | 5.053625 | 3.822788 | 4.160505 | 3.466990 |
|  | 23 C | 5.016121 | 5.252179 | 5.179290 | 5.539860 | 5.331464 |
|  | 24 C | 5.212930 | 5.632557 | 4.994533 | 5.246845 | 4.966368 |
|  | 25 H | 6.268167 | 6.702940 | 5.953868 | 6.140537 | 5.837731 |
|  | 26 H | 5.932071 | 6.092969 | 6.211075 | 6.592405 | 6.349786 |
|  |      | 21       | 22       | 23       | 24       | 25       |
|  | 21 S | 0.000000 |          |          |          |          |
|  | 22 S | 3.158275 | 0.000000 |          |          |          |
|  | 23 C | 1.748342 | 2.734131 | 0.000000 |          |          |
|  | 24 C | 2.686295 | 1.761233 | 1.375772 | 0.000000 |          |
|  | 25 H | 3.701827 | 2.418559 | 2.142715 | 1.085204 | 0.000000 |
|  | 26 H | 2.442215 | 3.692893 | 1.082151 | 2.170883 | 2.532270 |
|  |      | 26       |          |          |          |          |
|  | 26 H | 0.000000 |          |          |          |          |

CpIrS<sub>2</sub>C<sub>2</sub>H<sub>2</sub>·Cr(CO)<sub>3</sub>

|                                                                                                                |          |          |          |          |          |          |  |
|----------------------------------------------------------------------------------------------------------------|----------|----------|----------|----------|----------|----------|--|
| 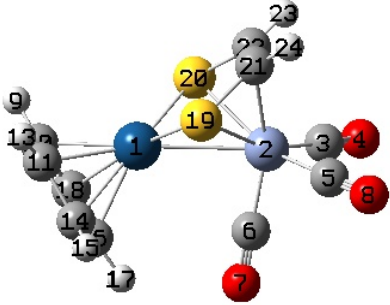 <p>1. -2555.102274 0.0</p> |          | 1        | 2        | 3        | 4        | 5        |  |
|                                                                                                                | 1 Ir     | 0.000000 |          |          |          |          |  |
|                                                                                                                | 2 Cr     | 2.758374 | 0.000000 |          |          |          |  |
|                                                                                                                | 3 C      | 4.250900 | 1.834606 | 0.000000 |          |          |  |
|                                                                                                                | 4 O      | 5.300880 | 2.983764 | 1.149232 | 0.000000 |          |  |
|                                                                                                                | 5 C      | 4.251061 | 1.834635 | 2.579961 | 3.480298 | 0.000000 |  |
|                                                                                                                | 6 C      | 3.074663 | 1.826648 | 2.571575 | 3.484851 | 2.571869 |  |
|                                                                                                                | 7 O      | 3.753920 | 2.981032 | 3.477281 | 4.196373 | 3.477627 |  |
|                                                                                                                | 8 O      | 5.300932 | 2.983784 | 3.480514 | 4.183204 | 1.149221 |  |
|                                                                                                                | 9 H      | 2.914872 | 5.481321 | 6.615735 | 7.475792 | 7.121840 |  |
|                                                                                                                | 10 C     | 2.176821 | 4.862428 | 6.119358 | 7.044023 | 6.413812 |  |
|                                                                                                                | 11 C     | 2.176842 | 4.862111 | 6.413493 | 7.456336 | 6.118870 |  |
|                                                                                                                | 12 H     | 2.936859 | 4.734274 | 5.424198 | 6.113645 | 6.378959 |  |
|                                                                                                                | 13 H     | 2.914920 | 5.480821 | 7.121634 | 8.195035 | 6.614587 |  |
|                                                                                                                | 14 C     | 2.193554 | 4.428125 | 5.985312 | 7.035505 | 5.464739 |  |
|                                                                                                                | 15 H     | 2.936923 | 4.733309 | 6.377072 | 7.457500 | 5.423656 |  |
|                                                                                                                | 16 C     | 2.204569 | 4.141037 | 5.376156 | 6.309375 | 5.377276 |  |
|                                                                                                                | 17 H     | 2.926885 | 4.174213 | 5.214641 | 6.071649 | 5.216389 |  |
|                                                                                                                | 18 C     | 2.193429 | 4.428583 | 5.464728 | 6.311225 | 5.986488 |  |
|                                                                                                                | 19 S     | 2.288991 | 2.435948 | 4.212490 | 5.343272 | 3.085630 |  |
|                                                                                                                | 20 S     | 2.288687 | 2.436060 | 3.086418 | 3.901847 | 4.212325 |  |
|                                                                                                                | 21 C     | 3.209142 | 2.169714 | 3.416107 | 4.405209 | 2.849141 |  |
| 22 C                                                                                                           | 3.209022 | 2.169758 | 2.850327 | 3.695603 | 3.415337 |          |  |

|  |    |   |          |          |          |          |          |  |  |
|--|----|---|----------|----------|----------|----------|----------|--|--|
|  | 23 | H | 4.244742 | 2.923256 | 2.987645 | 3.540907 | 3.928012 |  |  |
|  | 24 | H | 4.244878 | 2.923204 | 3.928875 | 4.805527 | 2.986109 |  |  |
|  |    |   | 6        | 7        | 8        | 9        | 10       |  |  |
|  | 6  | C | 0.000000 |          |          |          |          |  |  |
|  | 7  | O | 1.154393 | 0.000000 |          |          |          |  |  |
|  | 8  | O | 3.485221 | 4.196867 | 0.000000 |          |          |  |  |
|  | 9  | H | 5.700278 | 6.127178 | 8.194960 | 0.000000 |          |  |  |
|  | 10 | C | 4.868683 | 5.218984 | 7.456485 | 1.079814 | 0.000000 |  |  |
|  | 11 | C | 4.867840 | 5.217887 | 7.043244 | 2.241703 | 1.430790 |  |  |
|  | 12 | H | 4.221739 | 4.290052 | 7.459675 | 2.708866 | 2.247434 |  |  |
|  | 13 | H | 5.698949 | 6.125443 | 7.474108 | 2.697244 | 2.241685 |  |  |
|  | 14 | C | 3.991298 | 4.134140 | 6.311222 | 3.360252 | 2.316683 |  |  |
|  | 15 | H | 4.218844 | 4.286075 | 6.113075 | 4.371491 | 3.360893 |  |  |
|  | 16 | C | 3.344003 | 3.300113 | 6.310782 | 3.359199 | 2.315240 |  |  |
|  | 17 | H | 2.933132 | 2.549292 | 6.073980 | 4.369609 | 3.358723 |  |  |
|  | 18 | C | 3.992852 | 4.136278 | 7.036833 | 2.247735 | 1.434381 |  |  |
|  | 19 | S | 3.506358 | 4.446838 | 3.900629 | 4.817187 | 4.217448 |  |  |
|  | 20 | S | 3.507231 | 4.447923 | 5.342999 | 3.823095 | 3.637268 |  |  |
|  | 21 | C | 3.893922 | 5.021816 | 3.693999 | 5.525628 | 5.155357 |  |  |
|  | 22 | C | 3.894238 | 5.022203 | 4.404193 | 5.179501 | 4.961012 |  |  |
|  | 23 | H | 4.638473 | 5.757942 | 4.804393 | 5.992731 | 5.883335 |  |  |
|  | 24 | H | 4.637977 | 5.757307 | 3.538691 | 6.535731 | 6.182481 |  |  |
|  |    |   | 11       | 12       | 13       | 14       | 15       |  |  |
|  | 11 | C | 0.000000 |          |          |          |          |  |  |
|  | 12 | H | 3.360871 | 0.000000 |          |          |          |  |  |
|  | 13 | H | 1.079816 | 4.371471 | 0.000000 |          |          |  |  |
|  | 14 | C | 1.434355 | 3.355825 | 2.247703 | 0.000000 |          |  |  |
|  | 15 | H | 2.247416 | 4.364447 | 2.708833 | 1.079902 | 0.000000 |  |  |
|  | 16 | C | 2.315208 | 2.238590 | 3.359166 | 1.427691 | 2.238588 |  |  |
|  | 17 | H | 3.358682 | 2.693671 | 4.369562 | 2.238802 | 2.693634 |  |  |
|  | 18 | C | 2.316658 | 1.079903 | 3.360229 | 2.313093 | 3.355825 |  |  |
|  | 19 | S | 3.637013 | 5.201933 | 3.822449 | 3.530752 | 3.626762 |  |  |
|  | 20 | S | 4.217690 | 3.626105 | 4.817777 | 4.453478 | 5.201523 |  |  |
|  | 21 | C | 4.961029 | 5.815779 | 5.179465 | 5.015480 | 5.275078 |  |  |
|  | 22 | C | 5.155483 | 5.274661 | 5.525964 | 5.322845 | 5.815765 |  |  |
|  | 23 | H | 6.182689 | 6.042739 | 6.536231 | 6.386565 | 6.894381 |  |  |
|  | 24 | H | 5.883291 | 6.894438 | 5.992563 | 5.912119 | 6.043287 |  |  |
|  |    |   | 16       | 17       | 18       | 19       | 20       |  |  |
|  | 16 | C | 0.000000 |          |          |          |          |  |  |
|  | 17 | H | 1.080217 | 0.000000 |          |          |          |  |  |
|  | 18 | C | 1.427694 | 2.238826 | 0.000000 |          |          |  |  |
|  | 19 | S | 4.068703 | 4.536761 | 4.453751 | 0.000000 |          |  |  |
|  | 20 | S | 4.067915 | 4.535617 | 3.530182 | 3.186419 | 0.000000 |  |  |
|  | 21 | C | 5.240313 | 5.636510 | 5.322813 | 1.744966 | 2.724788 |  |  |
|  | 22 | C | 5.240015 | 5.636079 | 5.015104 | 2.724816 | 1.744901 |  |  |
|  | 23 | H | 6.226665 | 6.576084 | 5.911670 | 3.736014 | 2.432268 |  |  |
|  | 24 | H | 6.227086 | 6.576728 | 6.386566 | 2.432283 | 3.736005 |  |  |
|  |    |   | 21       | 22       | 23       | 24       |          |  |  |
|  | 21 | C | 0.000000 |          |          |          |          |  |  |
|  | 22 | C | 1.374506 | 0.000000 |          |          |          |  |  |



|  |      |          |          |                   |
|--|------|----------|----------|-------------------|
|  | 23 H | 2.154594 | 1.083263 | 0.000000          |
|  | 24 H | 1.083260 | 2.154652 | 2.523774 0.000000 |

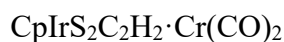

|      | 1        | 2        | 3        | 4        | 5        |
|------|----------|----------|----------|----------|----------|
| 1 Ir | 0.000000 |          |          |          |          |
| 2 Cr | 2.656645 | 0.000000 |          |          |          |
| 3 C  | 3.002875 | 1.825228 | 0.000000 |          |          |
| 4 O  | 3.696813 | 2.981235 | 1.156024 | 0.000000 |          |
| 5 C  | 4.127613 | 1.833365 | 2.556052 | 3.466486 | 0.000000 |
| 6 O  | 5.173321 | 2.984698 | 3.468086 | 4.182655 | 1.151380 |
| 7 H  | 2.933853 | 5.399511 | 5.716025 | 6.187074 | 6.521342 |
| 8 C  | 2.196913 | 4.787203 | 4.867433 | 5.250320 | 6.012843 |
| 9 C  | 2.202582 | 4.790664 | 4.793822 | 5.135541 | 6.311424 |
| 10 H | 2.925028 | 4.668352 | 4.319722 | 4.481750 | 5.273193 |
| 11 H | 2.942770 | 5.406285 | 5.597503 | 6.002116 | 7.035860 |
| 12 C | 2.194459 | 4.360097 | 3.880141 | 3.991953 | 5.851968 |
| 13 H | 2.939212 | 4.681169 | 4.060401 | 4.053591 | 6.253911 |
| 14 C | 2.205258 | 4.092564 | 3.324118 | 3.292609 | 5.230793 |
| 15 H | 2.928526 | 4.160254 | 2.947395 | 2.576773 | 5.070218 |
| 16 C | 2.180925 | 4.349092 | 4.023069 | 4.225736 | 5.312736 |
| 17 S | 2.331645 | 2.394493 | 3.364514 | 4.274382 | 4.196668 |
| 18 S | 2.293578 | 2.378150 | 3.593201 | 4.576010 | 3.049341 |
| 19 C | 3.207506 | 2.135087 | 3.818688 | 4.935885 | 3.456022 |
| 20 C | 3.212825 | 2.175302 | 3.948434 | 5.089976 | 2.947991 |
| 21 H | 4.251222 | 2.949706 | 4.724816 | 5.865575 | 3.148727 |
| 22 H | 4.249745 | 2.891151 | 4.524246 | 5.619257 | 3.970593 |
|      | 6        | 7        | 8        | 9        | 10       |
| 6 O  | 0.000000 |          |          |          |          |
| 7 H  | 7.375098 | 0.000000 |          |          |          |
| 8 C  | 6.924405 | 1.079847 | 0.000000 |          |          |
| 9 C  | 7.342806 | 2.234419 | 1.422178 | 0.000000 |          |
| 10 H | 5.923848 | 2.710210 | 2.250619 | 3.356992 | 0.000000 |
| 11 H | 8.105629 | 2.691327 | 2.234796 | 1.079714 | 4.368563 |
| 12 C | 6.878635 | 3.358050 | 2.313317 | 1.439466 | 3.350846 |
| 13 H | 7.308872 | 4.367798 | 3.356219 | 2.250439 | 4.360862 |
| 14 C | 6.127221 | 3.364448 | 2.321244 | 2.320413 | 2.240281 |
| 15 H | 5.875098 | 4.376253 | 3.365898 | 3.364089 | 2.699659 |
| 16 C | 6.129868 | 2.250719 | 1.438808 | 2.314004 | 1.079935 |
| 17 S | 5.337822 | 4.856611 | 4.259009 | 3.676587 | 5.237181 |
| 18 S | 3.874047 | 3.829223 | 3.651163 | 4.231133 | 3.625984 |
| 19 C | 4.468774 | 5.523406 | 5.158618 | 4.970116 | 5.807780 |
| 20 C | 3.816318 | 5.165505 | 4.960740 | 5.158521 | 5.276351 |
| 21 H | 3.747483 | 5.984339 | 5.888365 | 6.188109 | 6.051873 |
| 22 H | 4.876918 | 6.549111 | 6.198560 | 5.910373 | 6.885759 |

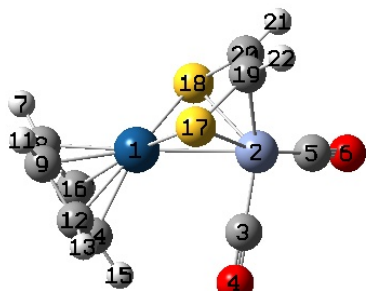

1. -2441.816596 0.0

|  |      |          |          |          |          |          |
|--|------|----------|----------|----------|----------|----------|
|  |      | 11       | 12       | 13       | 14       | 15       |
|  | 11 H | 0.000000 |          |          |          |          |
|  | 12 C | 2.251559 | 0.000000 |          |          |          |
|  | 13 H | 2.709935 | 1.080082 | 0.000000 |          |          |
|  | 14 C | 3.363026 | 1.425030 | 2.235869 | 0.000000 |          |
|  | 15 H | 4.373204 | 2.236533 | 2.690849 | 1.080016 | 0.000000 |
|  | 16 C | 3.358591 | 2.307672 | 3.351345 | 1.429517 | 2.242979 |
|  | 17 S | 3.853700 | 3.554828 | 3.643324 | 4.108607 | 4.582705 |
|  | 18 S | 4.829569 | 4.461318 | 5.213756 | 4.088716 | 4.569191 |
|  | 19 C | 5.187535 | 5.016590 | 5.282387 | 5.251673 | 5.661535 |
|  | 20 C | 5.521375 | 5.330446 | 5.831355 | 5.266579 | 5.684703 |
|  | 21 H | 6.533090 | 6.396166 | 6.910780 | 6.257145 | 6.629450 |
|  | 22 H | 6.025427 | 5.923909 | 6.061956 | 6.240072 | 6.597312 |
|  |      | 16       | 17       | 18       | 19       | 20       |
|  | 16 C | 0.000000 |          |          |          |          |
|  | 17 S | 4.482992 | 0.000000 |          |          |          |
|  | 18 S | 3.527974 | 3.232219 | 0.000000 |          |          |
|  | 19 C | 5.311032 | 1.753089 | 2.722385 | 0.000000 |          |
|  | 20 C | 5.010877 | 2.755559 | 1.744265 | 1.375647 | 0.000000 |
|  | 21 H | 5.913436 | 3.759538 | 2.437249 | 2.152809 | 1.083744 |
|  | 22 H | 6.378599 | 2.435639 | 3.728049 | 1.085607 | 2.144755 |
|  |      | 21       | 22       |          |          |          |
|  | 21 H | 0.000000 |          |          |          |          |
|  | 22 H | 2.501233 | 0.000000 |          |          |          |

**Table S5A.** Energy rank for all of the  $\text{CpIrS}_2\text{C}_2\text{H}_2\cdot\text{Fe}(\text{CO})_n$  optimized structures. PBE0/6-311G(d,p).

$\text{CpIrS}_2\text{C}_2\text{H}_2\cdot\text{Fe}(\text{CO})_n$

|     | name                                          | E (a.u.)     | $\Delta E$ (kcal/mol) |
|-----|-----------------------------------------------|--------------|-----------------------|
| 4-1 | 8-ir-fe-CO-4-md2                              | -2887.529409 | 0.0                   |
| 4-2 | 9-ir-fe-CO-4-md3                              | -2887.514336 | 9.5                   |
| 4-3 | 7-ir-fe-CO-4-md1-new-Fe-Co-h-r-ok-new-Fe-Ir-o | -2887.51292  | 10.4                  |
| 4-4 | 7-Co-fe-CO-4-md1-r1-freq-new-Fe-Ir-m-ok       | -2887.505712 | 14.9                  |
| 4-5 | 7-ir-fe-CO-4-md1                              | -2887.479272 | 31.5                  |
|     |                                               |              |                       |
|     | name                                          |              |                       |
| 3-1 | 5-ir-fe-CO-3-md2                              | -2774.29394  | 0.0                   |
| 3-2 | 4-ir-fe-CO-3-md1                              | -2774.281945 | 7.5                   |
| 3-3 | 6-ir-fe-CO-3-md3                              | -2774.270437 | 14.7                  |
|     |                                               |              |                       |
|     | name                                          |              |                       |
| 2-1 | 3-ir-fe-CO-2-md3-fneg1                        | -2661.045558 | 0.0                   |

|     |                                                  |              |     |
|-----|--------------------------------------------------|--------------|-----|
| 2-2 | 3-Co-fe-CO-2-md3-r1-freq-new-ir-fe-j-<br>freq-ok | -2661.031538 | 8.8 |
|-----|--------------------------------------------------|--------------|-----|

**Table S5B.** Distance table for the lowest-lying  $\text{CpIrS}_2\text{C}_2\text{H}_2\cdot\text{Fe}(\text{CO})_n$  structures after PBE0/6-311G(d,p) optimization.

$\text{CpIrS}_2\text{C}_2\text{H}_2\cdot\text{Fe}(\text{CO})_4$

|                                                                                                              |          |          |          |          |          |          |  |
|--------------------------------------------------------------------------------------------------------------|----------|----------|----------|----------|----------|----------|--|
| 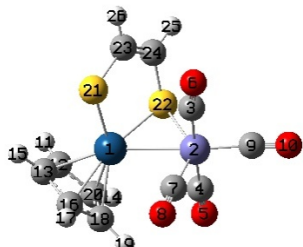 <p>1. -2887.529409 0.0</p> |          |          |          |          |          |          |  |
|                                                                                                              | 1        | 2        | 3        | 4        | 5        |          |  |
|                                                                                                              | 1 Ir     | 0.000000 |          |          |          |          |  |
|                                                                                                              | 2 Fe     | 2.697478 | 0.000000 |          |          |          |  |
|                                                                                                              | 3 C      | 3.431079 | 1.816025 | 0.000000 |          |          |  |
|                                                                                                              | 4 C      | 3.094581 | 1.794669 | 3.609415 | 0.000000 |          |  |
|                                                                                                              | 5 O      | 3.806721 | 2.934561 | 4.748556 | 1.140036 | 0.000000 |  |
|                                                                                                              | 6 O      | 4.311540 | 2.945461 | 1.134218 | 4.736521 | 5.874289 |  |
|                                                                                                              | 7 C      | 2.932658 | 1.767119 | 2.535126 | 2.579716 | 3.506567 |  |
|                                                                                                              | 8 O      | 3.639366 | 2.910709 | 3.436799 | 3.488444 | 4.236251 |  |
|                                                                                                              | 9 C      | 4.435909 | 1.764302 | 2.495075 | 2.508019 | 3.402309 |  |
|                                                                                                              | 10 O     | 5.575853 | 2.904687 | 3.384662 | 3.402043 | 4.096913 |  |
|                                                                                                              | 11 H     | 2.921698 | 5.409051 | 6.181593 | 5.214427 | 5.422332 |  |
|                                                                                                              | 12 C     | 2.175313 | 4.717384 | 5.590138 | 4.498209 | 4.740429 |  |
|                                                                                                              | 13 C     | 2.170659 | 4.767723 | 5.361198 | 4.885240 | 5.304589 |  |
|                                                                                                              | 14 H     | 2.950415 | 4.379495 | 5.834799 | 3.340070 | 3.084504 |  |
|                                                                                                              | 15 H     | 2.882682 | 5.459554 | 5.744362 | 5.814900 | 6.319868 |  |
|                                                                                                              | 16 C     | 2.201105 | 4.221411 | 5.006646 | 4.219065 | 4.617748 |  |
|                                                                                                              | 17 H     | 2.956509 | 4.568499 | 5.152375 | 4.748930 | 5.212739 |  |
|                                                                                                              | 18 C     | 2.219010 | 3.781272 | 5.037184 | 3.214083 | 3.362074 |  |
|                                                                                                              | 19 H     | 2.973930 | 3.757412 | 5.193219 | 2.897995 | 2.870138 |  |
|                                                                                                              | 20 C     | 2.206204 | 4.124146 | 5.400203 | 3.436486 | 3.462837 |  |
|                                                                                                              | 21 S     | 2.332825 | 3.686366 | 3.131436 | 4.905772 | 5.846603 |  |
|                                                                                                              | 22 S     | 2.316240 | 2.351131 | 3.040891 | 2.855660 | 3.630621 |  |
|                                                                                                              | 23 C     | 3.215389 | 3.827934 | 3.068267 | 5.123356 | 6.083824 |  |
|                                                                                                              | 24 C     | 3.238667 | 3.375655 | 3.039770 | 4.444697 | 5.331059 |  |
| 25 H                                                                                                         | 4.266416 | 4.084806 | 3.691839 | 5.072999 | 5.899048 |          |  |
| 26 H                                                                                                         | 4.250465 | 4.773866 | 3.726343 | 6.161578 | 7.141477 |          |  |
|                                                                                                              | 6        | 7        | 8        | 9        | 10       |          |  |
| 6 O                                                                                                          | 0.000000 |          |          |          |          |          |  |
| 7 C                                                                                                          | 3.436292 | 0.000000 |          |          |          |          |  |
| 8 O                                                                                                          | 4.146210 | 1.145669 | 0.000000 |          |          |          |  |
| 9 C                                                                                                          | 3.325137 | 2.934717 | 3.900275 | 0.000000 |          |          |  |
| 10 O                                                                                                         | 3.992612 | 3.895851 | 4.731600 | 1.142557 | 0.000000 |          |  |
| 11 H                                                                                                         | 6.961993 | 5.760859 | 6.320118 | 7.006681 | 8.098606 |          |  |
| 12 C                                                                                                         | 6.428966 | 4.844570 | 5.323379 | 6.375707 | 7.485567 |          |  |
| 13 C                                                                                                         | 6.079891 | 4.450349 | 4.691052 | 6.521171 | 7.656841 |          |  |
| 14 H                                                                                                         | 6.884267 | 4.771700 | 5.375381 | 5.677001 | 6.644673 |          |  |
| 15 H                                                                                                         | 6.297599 | 5.103442 | 5.276750 | 7.222606 | 8.363259 |          |  |
| 16 C                                                                                                         | 5.809460 | 3.487023 | 3.518912 | 5.910535 | 7.006609 |          |  |
| 17 H                                                                                                         | 5.846304 | 3.445162 | 3.144733 | 6.186219 | 7.241520 |          |  |
| 18 C                                                                                                         | 6.020877 | 3.330793 | 3.573153 | 5.325163 | 6.371590 |          |  |
| 19 H                                                                                                         | 6.221667 | 3.121996 | 3.239994 | 5.071471 | 6.020691 |          |  |
| 20 C                                                                                                         | 6.395286 | 4.243677 | 4.745644 | 5.642991 | 6.695305 |          |  |
| 21 S                                                                                                         | 3.407923 | 3.923407 | 4.524492 | 5.209129 | 6.274903 |          |  |
| 22 S                                                                                                         | 3.916619 | 3.785772 | 4.863507 | 3.474318 | 4.471441 |          |  |
| 23 C                                                                                                         | 3.197514 | 4.717062 | 5.569265 | 4.977357 | 5.920798 |          |  |

|                                                                                                                 |                                                   |
|-----------------------------------------------------------------------------------------------------------------|---------------------------------------------------|
|                                                                                                                 | 24 C 3.436148 4.692236 5.711362 4.304599 5.193566 |
|                                                                                                                 | 25 H 3.946745 5.562947 6.623033 4.653876 5.372656 |
|                                                                                                                 | 26 H 3.534359 5.609339 6.402406 5.766923 6.621626 |
|                                                                                                                 | 11 12 13 14 15                                    |
|                                                                                                                 | 11 H 0.000000                                     |
|                                                                                                                 | 12 C 1.079439 0.000000                            |
|                                                                                                                 | 13 C 2.245555 1.432240 0.000000                   |
|                                                                                                                 | 14 H 2.715407 2.249573 3.356154 0.000000          |
|                                                                                                                 | 15 H 2.695569 2.238350 1.080584 4.366525 0.000000 |
|                                                                                                                 | 16 C 3.368921 2.326997 1.428592 3.363741 2.238742 |
|                                                                                                                 | 17 H 4.379318 3.370768 2.245532 4.371963 2.702966 |
|                                                                                                                 | 18 C 3.359910 2.315905 2.305481 2.233810 3.350744 |
|                                                                                                                 | 19 H 4.370987 3.359885 3.349337 2.687188 4.361646 |
|                                                                                                                 | 20 C 2.254477 1.438326 2.311062 1.080342 3.354581 |
|                                                                                                                 | 21 S 4.116476 3.758056 3.270676 5.160679 3.183977 |
|                                                                                                                 | 22 S 3.996277 3.745567 4.309016 3.640584 4.913802 |
|                                                                                                                 | 23 C 4.716714 4.626233 4.597894 5.654956 4.610026 |
|                                                                                                                 | 24 C 4.695580 4.648119 4.971297 5.159413 5.233625 |
|                                                                                                                 | 25 H 5.479506 5.551390 5.993301 5.881942 6.247296 |
|                                                                                                                 | 26 H 5.537447 5.541398 5.432775 6.699246 5.275258 |
|                                                                                                                 | 16 17 18 19 20                                    |
|                                                                                                                 | 16 C 0.000000                                     |
|                                                                                                                 | 17 H 1.079460 0.000000                            |
|                                                                                                                 | 18 C 1.436030 2.249615 0.000000                   |
|                                                                                                                 | 19 H 2.244311 2.703770 1.080376 0.000000          |
|                                                                                                                 | 20 C 2.320383 3.362530 1.421714 2.232763 0.000000 |
|                                                                                                                 | 21 S 3.699628 4.017613 4.363334 5.112826 4.396687 |
|                                                                                                                 | 22 S 4.473087 5.214572 4.042256 4.495069 3.562766 |
|                                                                                                                 | 23 C 5.109376 5.577080 5.433782 6.119368 5.164924 |
|                                                                                                                 | 24 C 5.391628 6.006755 5.357468 5.940646 4.915077 |
|                                                                                                                 | 25 H 6.442494 7.079273 6.317715 6.856139 5.779161 |
|                                                                                                                 | 26 H 6.020208 6.410575 6.459662 7.163232 6.194774 |
|                                                                                                                 | 21 22 23 24 25                                    |
|                                                                                                                 | 21 S 0.000000                                     |
|                                                                                                                 | 22 S 3.184736 0.000000                            |
|                                                                                                                 | 23 C 1.725548 2.695863 0.000000                   |
|                                                                                                                 | 24 C 2.707903 1.753643 1.342305 0.000000          |
|                                                                                                                 | 25 H 3.722941 2.429620 2.142364 1.083611 0.000000 |
|                                                                                                                 | 26 H 2.402470 3.709505 1.086291 2.117831 2.503654 |
|                                                                                                                 | 26                                                |
|                                                                                                                 | 26 H 0.000000                                     |
|                                                                                                                 | 1 2 3 4 5                                         |
|                                                                                                                 | 1 Ir 0.000000                                     |
|                                                                                                                 | 2 Fe 4.361511 0.000000                            |
|                                                                                                                 | 3 C 5.325148 1.772322 0.000000                    |
|                                                                                                                 | 4 C 5.323761 1.772393 3.022816 0.000000           |
|                                                                                                                 | 5 O 6.154956 2.915216 4.027591 1.143167 0.000000  |
|                                                                                                                 | 6 O 6.157654 2.915144 1.143200 4.026895 4.933089  |
|                                                                                                                 | 7 C 3.553817 1.803766 2.502545 2.504471 3.397597  |
|                                                                                                                 | 8 O 3.561383 2.938085 3.370434 3.373484 4.057874  |
| 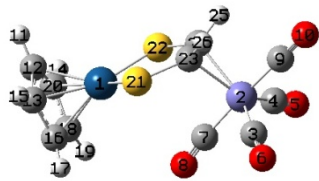 <p>2. -2887.514336 +9.5</p> |                                                   |

|  |    |   |          |          |          |          |          |  |  |
|--|----|---|----------|----------|----------|----------|----------|--|--|
|  | 9  | C | 5.698694 | 1.795251 | 2.512757 | 2.514593 | 3.413901 |  |  |
|  | 10 | O | 6.659563 | 2.934413 | 3.416036 | 3.418771 | 4.123748 |  |  |
|  | 11 | H | 2.898731 | 7.089240 | 8.116602 | 7.970790 | 8.706790 |  |  |
|  | 12 | C | 2.165019 | 6.511506 | 7.461972 | 7.375571 | 8.110703 |  |  |
|  | 13 | C | 2.190152 | 6.336930 | 6.962083 | 7.415097 | 8.252683 |  |  |
|  | 14 | H | 2.937632 | 6.564746 | 7.823418 | 6.883747 | 7.336908 |  |  |
|  | 15 | H | 2.930584 | 6.780557 | 7.229353 | 8.034416 | 8.949004 |  |  |
|  | 16 | C | 2.177258 | 5.859754 | 6.394000 | 6.790176 | 7.562150 |  |  |
|  | 17 | H | 2.912300 | 5.908202 | 6.150694 | 6.904379 | 7.701830 |  |  |
|  | 18 | C | 2.168413 | 5.766486 | 6.609921 | 6.348850 | 6.956160 |  |  |
|  | 19 | H | 2.900795 | 5.734849 | 6.564850 | 6.068619 | 6.546886 |  |  |
|  | 20 | C | 2.203178 | 6.225104 | 7.305148 | 6.782144 | 7.368710 |  |  |
|  | 21 | S | 2.257124 | 3.416896 | 3.891704 | 4.963967 | 6.036460 |  |  |
|  | 22 | S | 2.259024 | 3.415715 | 4.964215 | 3.884276 | 4.566140 |  |  |
|  | 23 | C | 3.224474 | 2.142450 | 3.062285 | 3.685795 | 4.776395 |  |  |
|  | 24 | C | 3.225406 | 2.142574 | 3.689688 | 3.055363 | 3.984532 |  |  |
|  | 25 | H | 4.170429 | 2.658846 | 4.235781 | 3.218073 | 3.998198 |  |  |
|  | 26 | H | 4.168961 | 2.658956 | 3.227348 | 4.232042 | 5.321288 |  |  |
|  |    |   | 6        | 7        | 8        | 9        | 10       |  |  |
|  | 6  | O | 0.000000 |          |          |          |          |  |  |
|  | 7  | C | 3.395172 | 0.000000 |          |          |          |  |  |
|  | 8  | O | 4.053551 | 1.137363 | 0.000000 |          |          |  |  |
|  | 9  | C | 3.411759 | 3.597807 | 4.729023 | 0.000000 |          |  |  |
|  | 10 | O | 4.120136 | 4.736689 | 5.866843 | 1.139163 | 0.000000 |  |  |
|  | 11 | H | 8.924878 | 6.438462 | 6.370875 | 8.162575 | 8.963864 |  |  |
|  | 12 | C | 8.239523 | 5.650358 | 5.459721 | 7.762078 | 8.655238 |  |  |
|  | 13 | C | 7.582222 | 5.350270 | 5.071547 | 7.677578 | 8.614119 |  |  |
|  | 14 | H | 8.740441 | 5.592310 | 5.305700 | 7.883975 | 8.808652 |  |  |
|  | 15 | H | 7.748840 | 5.932746 | 5.732434 | 8.005969 | 8.884095 |  |  |
|  | 16 | C | 6.976410 | 4.553595 | 4.032250 | 7.412533 | 8.447516 |  |  |
|  | 17 | H | 6.577751 | 4.493507 | 3.855729 | 7.515860 | 8.574381 |  |  |
|  | 18 | C | 7.342813 | 4.398663 | 3.825959 | 7.357309 | 8.409367 |  |  |
|  | 19 | H | 7.286797 | 4.195461 | 3.440304 | 7.414688 | 8.505029 |  |  |
|  | 20 | C | 8.144499 | 5.161424 | 4.827296 | 7.620228 | 8.582755 |  |  |
|  | 21 | S | 4.577146 | 3.258122 | 3.725000 | 4.437892 | 5.302933 |  |  |
|  | 22 | S | 6.037552 | 3.254472 | 3.720897 | 4.440679 | 5.307599 |  |  |
|  | 23 | C | 3.994191 | 2.884989 | 3.798803 | 2.776401 | 3.609217 |  |  |
|  | 24 | C | 4.781728 | 2.884222 | 3.798011 | 2.778787 | 3.612413 |  |  |
|  | 25 | H | 5.326532 | 3.764229 | 4.733730 | 2.620198 | 3.174524 |  |  |
|  | 26 | H | 4.011515 | 3.765344 | 4.734854 | 2.616189 | 3.168565 |  |  |
|  |    |   | 11       | 12       | 13       | 14       | 15       |  |  |
|  | 11 | H | 0.000000 |          |          |          |          |  |  |
|  | 12 | C | 1.080136 | 0.000000 |          |          |          |  |  |
|  | 13 | C | 2.247108 | 1.438604 | 0.000000 |          |          |  |  |
|  | 14 | H | 2.697703 | 2.241867 | 3.370040 | 0.000000 |          |  |  |
|  | 15 | H | 2.702041 | 2.248840 | 1.079708 | 4.377639 | 0.000000 |  |  |
|  | 16 | C | 3.350447 | 2.308222 | 1.420785 | 3.367501 | 2.237331 |  |  |
|  | 17 | H | 4.364382 | 3.354838 | 2.236971 | 4.374353 | 2.701974 |  |  |
|  | 18 | C | 3.346423 | 2.302808 | 2.316605 | 2.238756 | 3.362949 |  |  |
|  | 19 | H | 4.359075 | 3.348251 | 3.357396 | 2.700396 | 4.370547 |  |  |

|                                                                                                                 |                                                   |
|-----------------------------------------------------------------------------------------------------------------|---------------------------------------------------|
|                                                                                                                 | 20 C 2.240436 1.429599 2.326770 1.079747 3.368348 |
|                                                                                                                 | 21 S 4.511594 4.024336 3.516922 5.174147 3.624231 |
|                                                                                                                 | 22 S 4.240334 3.860587 4.380435 3.519809 5.097789 |
|                                                                                                                 | 23 C 5.572091 5.191472 5.028467 5.807256 5.279120 |
|                                                                                                                 | 24 C 5.476281 5.135864 5.322127 5.226862 5.796120 |
|                                                                                                                 | 25 H 6.116721 5.915512 6.243189 5.871648 6.696041 |
|                                                                                                                 | 26 H 6.268344 6.000898 5.794219 6.771550 5.887158 |
|                                                                                                                 | 16 17 18 19 20                                    |
|                                                                                                                 | 16 C 0.000000                                     |
|                                                                                                                 | 17 H 1.079849 0.000000                            |
|                                                                                                                 | 18 C 1.442814 2.250215 0.000000                   |
|                                                                                                                 | 19 H 2.249891 2.700606 1.080030 0.000000          |
|                                                                                                                 | 20 C 2.322411 3.362967 1.424057 2.238553 0.000000 |
|                                                                                                                 | 21 S 3.605624 3.786076 4.172014 4.752723 4.436806 |
|                                                                                                                 | 22 S 4.294319 4.956691 3.724050 4.002386 3.467686 |
|                                                                                                                 | 23 C 5.009983 5.245461 5.186974 5.559232 5.338115 |
|                                                                                                                 | 24 C 5.246696 5.663866 5.033292 5.290133 5.008588 |
|                                                                                                                 | 25 H 6.260913 6.727523 5.969707 6.213542 5.794670 |
|                                                                                                                 | 26 H 5.906087 6.094721 6.198870 6.617698 6.295573 |
|                                                                                                                 | 21 22 23 24 25                                    |
|                                                                                                                 | 21 S 0.000000                                     |
|                                                                                                                 | 22 S 3.151298 0.000000                            |
|                                                                                                                 | 23 C 1.765687 2.745660 0.000000                   |
|                                                                                                                 | 24 C 2.746365 1.765424 1.403675 0.000000          |
|                                                                                                                 | 25 H 3.685119 2.391883 2.162779 1.084854 0.000000 |
|                                                                                                                 | 26 H 2.390900 3.684930 1.084861 2.163081 2.494418 |
|                                                                                                                 | 26                                                |
|                                                                                                                 | 26 H 0.000000                                     |
|                                                                                                                 | 1 2 3 4 5                                         |
|                                                                                                                 | 1 Ir 0.000000                                     |
|                                                                                                                 | 2 Fe 3.296974 0.000000                            |
|                                                                                                                 | 3 C 4.448973 1.767836 0.000000                    |
|                                                                                                                 | 4 C 3.830756 1.767677 2.719992 0.000000           |
|                                                                                                                 | 5 O 4.511083 2.908511 3.684372 1.141057 0.000000  |
|                                                                                                                 | 6 O 5.339680 2.905210 1.138296 3.679454 4.506808  |
|                                                                                                                 | 7 C 2.059598 2.012170 2.636293 2.479400 3.290436  |
|                                                                                                                 | 8 O 2.880163 2.913548 2.918539 3.015779 3.586602  |
|                                                                                                                 | 9 C 4.864058 1.821210 2.635461 2.662904 3.582537  |
|                                                                                                                 | 10 O 5.930446 2.957931 3.555415 3.563008 4.306300 |
|                                                                                                                 | 11 H 3.050460 5.520179 7.078913 5.583698 5.889328 |
|                                                                                                                 | 12 C 2.323951 5.165516 6.572141 5.211812 5.529655 |
|                                                                                                                 | 13 C 2.354113 5.615532 6.790295 5.927171 6.370196 |
|                                                                                                                 | 14 H 2.963596 4.604299 5.953960 3.895077 3.800429 |
|                                                                                                                 | 15 H 3.094129 6.302921 7.460399 6.809574 7.331596 |
|                                                                                                                 | 16 C 2.221451 5.363610 6.246638 5.563815 5.964120 |
|                                                                                                                 | 17 H 2.952956 5.933114 6.569052 6.248300 6.689920 |
|                                                                                                                 | 18 C 2.205249 4.809833 5.737829 4.594445 4.798471 |
|                                                                                                                 | 19 H 2.883755 4.892560 5.556781 4.468840 4.548365 |
|                                                                                                                 | 20 C 2.215016 4.604492 5.893635 4.265478 4.406591 |
|                                                                                                                 | 21 S 2.314517 3.807052 4.323527 5.071239 6.019646 |
| 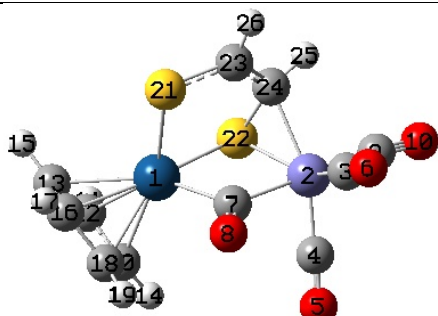 <p>3. -2887.51292 +10.4</p> |                                                   |

|  |    |   |          |          |          |          |          |  |  |
|--|----|---|----------|----------|----------|----------|----------|--|--|
|  | 22 | S | 2.353340 | 2.273550 | 3.905303 | 3.240479 | 4.139719 |  |  |
|  | 23 | C | 3.128823 | 3.022191 | 3.482119 | 4.655290 | 5.749305 |  |  |
|  | 24 | C | 3.167909 | 2.103681 | 3.071068 | 3.770646 | 4.878889 |  |  |
|  | 25 | H | 4.205060 | 2.695239 | 3.498187 | 4.350766 | 5.451433 |  |  |
|  | 26 | H | 4.179071 | 3.768770 | 3.837035 | 5.478045 | 6.597822 |  |  |
|  |    |   | 6        | 7        | 8        | 9        | 10       |  |  |
|  | 6  | O | 0.000000 |          |          |          |          |  |  |
|  | 7  | C | 3.453238 | 0.000000 |          |          |          |  |  |
|  | 8  | O | 3.406776 | 1.189260 | 0.000000 |          |          |  |  |
|  | 9  | C | 3.572904 | 3.831736 | 4.682861 | 0.000000 |          |  |  |
|  | 10 | O | 4.329827 | 4.966950 | 5.794439 | 1.138127 | 0.000000 |  |  |
|  | 11 | H | 8.106999 | 4.852385 | 5.655767 | 6.555536 | 7.372404 |  |  |
|  | 12 | C | 7.532865 | 4.148492 | 4.816924 | 6.450973 | 7.379754 |  |  |
|  | 13 | C | 7.633247 | 4.295392 | 4.813358 | 7.066757 | 8.066274 |  |  |
|  | 14 | H | 6.909156 | 3.713123 | 4.185421 | 5.840594 | 6.736869 |  |  |
|  | 15 | H | 8.282772 | 5.088998 | 5.647571 | 7.672402 | 8.637109 |  |  |
|  | 16 | C | 6.955891 | 3.658510 | 3.848335 | 7.027418 | 8.110097 |  |  |
|  | 17 | H | 7.136885 | 4.102090 | 4.073162 | 7.660816 | 8.769977 |  |  |
|  | 18 | C | 6.490249 | 3.117668 | 3.222579 | 6.467305 | 7.538220 |  |  |
|  | 19 | H | 6.186230 | 3.080323 | 2.803476 | 6.603890 | 7.687829 |  |  |
|  | 20 | C | 6.815391 | 3.414193 | 3.895467 | 6.015917 | 6.991590 |  |  |
|  | 21 | S | 4.926032 | 2.884613 | 3.496036 | 5.228937 | 6.254383 |  |  |
|  | 22 | S | 4.993263 | 2.817339 | 4.005415 | 3.073033 | 3.959925 |  |  |
|  | 23 | C | 4.132259 | 3.074923 | 3.902188 | 4.023625 | 4.935239 |  |  |
|  | 24 | C | 3.978342 | 2.954786 | 4.005004 | 2.771604 | 3.657789 |  |  |
|  | 25 | H | 4.322675 | 3.956183 | 4.978821 | 2.624750 | 3.221685 |  |  |
|  | 26 | H | 4.250223 | 3.965814 | 4.643542 | 4.515838 | 5.301739 |  |  |
|  |    |   | 11       | 12       | 13       | 14       | 15       |  |  |
|  | 11 | H | 0.000000 |          |          |          |          |  |  |
|  | 12 | C | 1.080861 | 0.000000 |          |          |          |  |  |
|  | 13 | C | 2.213572 | 1.399593 | 0.000000 |          |          |  |  |
|  | 14 | H | 2.708277 | 2.257148 | 3.351900 | 0.000000 |          |  |  |
|  | 15 | H | 2.671815 | 2.216692 | 1.080033 | 4.364142 | 0.000000 |  |  |
|  | 16 | C | 3.343927 | 2.297134 | 1.446072 | 3.348342 | 2.256676 |  |  |
|  | 17 | H | 4.353345 | 3.339243 | 2.257353 | 4.358099 | 2.716910 |  |  |
|  | 18 | C | 3.356858 | 2.314858 | 2.322660 | 2.242170 | 3.364698 |  |  |
|  | 19 | H | 4.371639 | 3.362415 | 3.366491 | 2.707536 | 4.374504 |  |  |
|  | 20 | C | 2.251101 | 1.446391 | 2.314000 | 1.079727 | 3.359736 |  |  |
|  | 21 | S | 4.894372 | 4.289398 | 3.716058 | 5.273656 | 3.898457 |  |  |
|  | 22 | S | 3.706113 | 3.642278 | 4.193487 | 3.899912 | 4.689538 |  |  |
|  | 23 | C | 5.572263 | 5.184125 | 4.964629 | 5.865269 | 5.177594 |  |  |
|  | 24 | C | 5.259536 | 5.043615 | 5.208646 | 5.396670 | 5.559109 |  |  |
|  | 25 | H | 5.995414 | 5.919450 | 6.146740 | 6.265436 | 6.418590 |  |  |
|  | 26 | H | 6.598390 | 6.223291 | 5.903771 | 6.946135 | 6.012830 |  |  |
|  |    |   | 16       | 17       | 18       | 19       | 20       |  |  |
|  | 16 | C | 0.000000 |          |          |          |          |  |  |
|  | 17 | H | 1.080317 | 0.000000 |          |          |          |  |  |
|  | 18 | C | 1.422738 | 2.231879 | 0.000000 |          |          |  |  |
|  | 19 | H | 2.232556 | 2.682896 | 1.080298 | 0.000000 |          |  |  |
|  | 20 | C | 2.303947 | 3.347021 | 1.427282 | 2.242492 | 0.000000 |  |  |



|                                                                                                                 | 21 S 3.493983 3.565028 4.078525 4.535986 4.481305<br>22 S 4.519381 5.278440 4.305124 4.877875 3.691897<br>23 C 4.900972 5.134588 5.189363 5.582523 5.302129<br>24 C 5.290585 5.768325 5.277649 5.684108 5.063371<br>25 H 6.335209 6.819894 6.326164 6.742283 6.009639<br>26 H 5.806893 5.907263 6.178435 6.517646 6.371312<br>21    22    23    24    25<br>21 S 0.000000<br>22 S 3.239432 0.000000<br>23 C 1.662139 2.751496 0.000000<br>24 C 2.720483 1.779867 1.406852 0.000000<br>25 H 3.640219 2.446519 2.114641 1.086251 0.000000<br>26 H 2.360277 3.739589 1.088150 2.152105 2.421635<br>26<br>26 H 0.000000                                                                                                                                                                                                                                                                                                                                                                                                                                                                                                                                                                                                                                                                                                                                                                                                                                                                                                                                                                                                                                                                                                                                                                                                                                                                                                                                                                                                                                                                                                                                                                                                                                                                                                                                                                                                                                                                                                                                                                                                                                                                                                                                                                                                                                                                                                                                                                                                                                                                                                                                                                                                                                                                                                                                                                                                                                                                                                                                                                                                                                                                                                                                     |          |          |          |          |   |   |      |          |  |  |  |  |      |          |          |  |  |  |     |          |          |          |  |  |     |          |          |          |          |  |     |          |          |          |          |          |     |          |          |          |          |          |     |          |          |          |          |          |     |          |          |          |          |          |     |          |          |          |          |          |      |          |          |          |          |          |      |          |          |          |          |          |      |          |          |          |          |          |      |          |          |          |          |          |      |          |          |          |          |          |      |          |          |          |          |          |      |          |          |          |          |          |      |          |          |          |          |          |      |          |          |          |          |          |      |          |          |          |          |          |      |          |          |          |          |          |      |          |          |          |          |          |      |          |          |          |          |          |      |          |          |          |          |          |      |          |          |          |          |          |      |          |          |          |          |          |      |          |          |          |          |          |  |   |   |   |   |    |     |          |  |  |  |  |     |          |          |  |  |  |     |          |          |          |  |  |     |          |          |          |          |  |      |          |          |          |          |          |      |          |          |          |          |          |      |          |          |          |          |          |
|-----------------------------------------------------------------------------------------------------------------|---------------------------------------------------------------------------------------------------------------------------------------------------------------------------------------------------------------------------------------------------------------------------------------------------------------------------------------------------------------------------------------------------------------------------------------------------------------------------------------------------------------------------------------------------------------------------------------------------------------------------------------------------------------------------------------------------------------------------------------------------------------------------------------------------------------------------------------------------------------------------------------------------------------------------------------------------------------------------------------------------------------------------------------------------------------------------------------------------------------------------------------------------------------------------------------------------------------------------------------------------------------------------------------------------------------------------------------------------------------------------------------------------------------------------------------------------------------------------------------------------------------------------------------------------------------------------------------------------------------------------------------------------------------------------------------------------------------------------------------------------------------------------------------------------------------------------------------------------------------------------------------------------------------------------------------------------------------------------------------------------------------------------------------------------------------------------------------------------------------------------------------------------------------------------------------------------------------------------------------------------------------------------------------------------------------------------------------------------------------------------------------------------------------------------------------------------------------------------------------------------------------------------------------------------------------------------------------------------------------------------------------------------------------------------------------------------------------------------------------------------------------------------------------------------------------------------------------------------------------------------------------------------------------------------------------------------------------------------------------------------------------------------------------------------------------------------------------------------------------------------------------------------------------------------------------------------------------------------------------------------------------------------------------------------------------------------------------------------------------------------------------------------------------------------------------------------------------------------------------------------------------------------------------------------------------------------------------------------------------------------------------------------------------------------------------------------------------------------------------------------------|----------|----------|----------|----------|---|---|------|----------|--|--|--|--|------|----------|----------|--|--|--|-----|----------|----------|----------|--|--|-----|----------|----------|----------|----------|--|-----|----------|----------|----------|----------|----------|-----|----------|----------|----------|----------|----------|-----|----------|----------|----------|----------|----------|-----|----------|----------|----------|----------|----------|-----|----------|----------|----------|----------|----------|------|----------|----------|----------|----------|----------|------|----------|----------|----------|----------|----------|------|----------|----------|----------|----------|----------|------|----------|----------|----------|----------|----------|------|----------|----------|----------|----------|----------|------|----------|----------|----------|----------|----------|------|----------|----------|----------|----------|----------|------|----------|----------|----------|----------|----------|------|----------|----------|----------|----------|----------|------|----------|----------|----------|----------|----------|------|----------|----------|----------|----------|----------|------|----------|----------|----------|----------|----------|------|----------|----------|----------|----------|----------|------|----------|----------|----------|----------|----------|------|----------|----------|----------|----------|----------|------|----------|----------|----------|----------|----------|------|----------|----------|----------|----------|----------|--|---|---|---|---|----|-----|----------|--|--|--|--|-----|----------|----------|--|--|--|-----|----------|----------|----------|--|--|-----|----------|----------|----------|----------|--|------|----------|----------|----------|----------|----------|------|----------|----------|----------|----------|----------|------|----------|----------|----------|----------|----------|
| 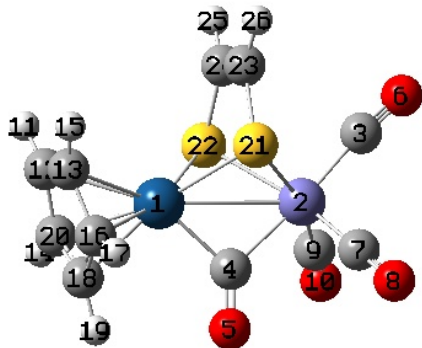 <p>4. -2887.505712 +14.9</p> | <table border="1"> <thead> <tr> <th></th> <th>1</th> <th>2</th> <th>3</th> <th>4</th> <th>5</th> </tr> </thead> <tbody> <tr><td>1 Ir</td><td>0.000000</td><td></td><td></td><td></td><td></td></tr> <tr><td>2 Fe</td><td>3.006792</td><td>0.000000</td><td></td><td></td><td></td></tr> <tr><td>3 C</td><td>4.476373</td><td>1.846560</td><td>0.000000</td><td></td><td></td></tr> <tr><td>4 C</td><td>1.990258</td><td>2.002047</td><td>3.843495</td><td>0.000000</td><td></td></tr> <tr><td>5 O</td><td>2.899999</td><td>2.935007</td><td>4.758710</td><td>1.187279</td><td>0.000000</td></tr> <tr><td>6 O</td><td>5.541232</td><td>2.977324</td><td>1.135516</td><td>4.977294</td><td>5.867961</td></tr> <tr><td>7 C</td><td>4.063755</td><td>1.762946</td><td>2.693992</td><td>2.608837</td><td>3.030895</td></tr> <tr><td>8 O</td><td>4.942050</td><td>2.900201</td><td>3.623583</td><td>3.435051</td><td>3.569081</td></tr> <tr><td>9 C</td><td>4.063799</td><td>1.762959</td><td>2.694136</td><td>2.608551</td><td>3.030452</td></tr> <tr><td>10 O</td><td>4.942451</td><td>2.900230</td><td>3.623906</td><td>3.434613</td><td>3.568098</td></tr> <tr><td>11 H</td><td>3.103815</td><td>5.721029</td><td>6.740596</td><td>4.966502</td><td>5.716732</td></tr> <tr><td>12 C</td><td>2.365225</td><td>5.250933</td><td>6.489563</td><td>4.221932</td><td>4.880502</td></tr> <tr><td>13 C</td><td>2.364781</td><td>5.249790</td><td>6.489342</td><td>4.219619</td><td>4.877333</td></tr> <tr><td>14 H</td><td>2.933353</td><td>5.289641</td><td>6.772203</td><td>3.901712</td><td>4.163929</td></tr> <tr><td>15 H</td><td>3.103105</td><td>5.718928</td><td>6.740063</td><td>4.962703</td><td>5.711553</td></tr> <tr><td>16 C</td><td>2.194331</td><td>4.943246</td><td>6.447323</td><td>3.519576</td><td>3.905335</td></tr> <tr><td>17 H</td><td>2.933601</td><td>5.287754</td><td>6.773098</td><td>3.895586</td><td>4.153951</td></tr> <tr><td>18 C</td><td>2.173431</td><td>4.845520</td><td>6.517167</td><td>3.114180</td><td>3.257404</td></tr> <tr><td>19 H</td><td>2.848146</td><td>5.032084</td><td>6.818890</td><td>3.092229</td><td>2.827886</td></tr> <tr><td>20 C</td><td>2.194387</td><td>4.944591</td><td>6.447096</td><td>3.523428</td><td>3.911187</td></tr> <tr><td>21 S</td><td>2.411410</td><td>2.417563</td><td>3.163554</td><td>2.875303</td><td>3.934732</td></tr> <tr><td>22 S</td><td>2.411300</td><td>2.417643</td><td>3.163667</td><td>2.875126</td><td>3.934542</td></tr> <tr><td>23 C</td><td>3.214965</td><td>3.132939</td><td>3.079014</td><td>4.082978</td><td>5.258045</td></tr> <tr><td>24 C</td><td>3.214953</td><td>3.132940</td><td>3.079015</td><td>4.082926</td><td>5.257987</td></tr> <tr><td>25 H</td><td>4.165253</td><td>4.060965</td><td>3.688951</td><td>5.085231</td><td>6.241570</td></tr> <tr><td>26 H</td><td>4.165262</td><td>4.060948</td><td>3.688941</td><td>5.085297</td><td>6.241648</td></tr> <tr> <td></td> <td>6</td> <td>7</td> <td>8</td> <td>9</td> <td>10</td> </tr> <tr><td>6 O</td><td>0.000000</td><td></td><td></td><td></td><td></td></tr> <tr><td>7 C</td><td>3.585076</td><td>0.000000</td><td></td><td></td><td></td></tr> <tr><td>8 O</td><td>4.344991</td><td>1.137667</td><td>0.000000</td><td></td><td></td></tr> <tr><td>9 C</td><td>3.585254</td><td>2.585545</td><td>3.519197</td><td>0.000000</td><td></td></tr> <tr><td>10 O</td><td>4.345393</td><td>3.518530</td><td>4.288502</td><td>1.137665</td><td>0.000000</td></tr> <tr><td>11 H</td><td>7.607614</td><td>7.070174</td><td>8.006155</td><td>6.567752</td><td>7.262376</td></tr> <tr><td>12 C</td><td>7.448935</td><td>6.425671</td><td>7.287248</td><td>6.141230</td><td>6.868917</td></tr> </tbody> </table> |          | 1        | 2        | 3        | 4 | 5 | 1 Ir | 0.000000 |  |  |  |  | 2 Fe | 3.006792 | 0.000000 |  |  |  | 3 C | 4.476373 | 1.846560 | 0.000000 |  |  | 4 C | 1.990258 | 2.002047 | 3.843495 | 0.000000 |  | 5 O | 2.899999 | 2.935007 | 4.758710 | 1.187279 | 0.000000 | 6 O | 5.541232 | 2.977324 | 1.135516 | 4.977294 | 5.867961 | 7 C | 4.063755 | 1.762946 | 2.693992 | 2.608837 | 3.030895 | 8 O | 4.942050 | 2.900201 | 3.623583 | 3.435051 | 3.569081 | 9 C | 4.063799 | 1.762959 | 2.694136 | 2.608551 | 3.030452 | 10 O | 4.942451 | 2.900230 | 3.623906 | 3.434613 | 3.568098 | 11 H | 3.103815 | 5.721029 | 6.740596 | 4.966502 | 5.716732 | 12 C | 2.365225 | 5.250933 | 6.489563 | 4.221932 | 4.880502 | 13 C | 2.364781 | 5.249790 | 6.489342 | 4.219619 | 4.877333 | 14 H | 2.933353 | 5.289641 | 6.772203 | 3.901712 | 4.163929 | 15 H | 3.103105 | 5.718928 | 6.740063 | 4.962703 | 5.711553 | 16 C | 2.194331 | 4.943246 | 6.447323 | 3.519576 | 3.905335 | 17 H | 2.933601 | 5.287754 | 6.773098 | 3.895586 | 4.153951 | 18 C | 2.173431 | 4.845520 | 6.517167 | 3.114180 | 3.257404 | 19 H | 2.848146 | 5.032084 | 6.818890 | 3.092229 | 2.827886 | 20 C | 2.194387 | 4.944591 | 6.447096 | 3.523428 | 3.911187 | 21 S | 2.411410 | 2.417563 | 3.163554 | 2.875303 | 3.934732 | 22 S | 2.411300 | 2.417643 | 3.163667 | 2.875126 | 3.934542 | 23 C | 3.214965 | 3.132939 | 3.079014 | 4.082978 | 5.258045 | 24 C | 3.214953 | 3.132940 | 3.079015 | 4.082926 | 5.257987 | 25 H | 4.165253 | 4.060965 | 3.688951 | 5.085231 | 6.241570 | 26 H | 4.165262 | 4.060948 | 3.688941 | 5.085297 | 6.241648 |  | 6 | 7 | 8 | 9 | 10 | 6 O | 0.000000 |  |  |  |  | 7 C | 3.585076 | 0.000000 |  |  |  | 8 O | 4.344991 | 1.137667 | 0.000000 |  |  | 9 C | 3.585254 | 2.585545 | 3.519197 | 0.000000 |  | 10 O | 4.345393 | 3.518530 | 4.288502 | 1.137665 | 0.000000 | 11 H | 7.607614 | 7.070174 | 8.006155 | 6.567752 | 7.262376 | 12 C | 7.448935 | 6.425671 | 7.287248 | 6.141230 | 6.868917 |
|                                                                                                                 | 1                                                                                                                                                                                                                                                                                                                                                                                                                                                                                                                                                                                                                                                                                                                                                                                                                                                                                                                                                                                                                                                                                                                                                                                                                                                                                                                                                                                                                                                                                                                                                                                                                                                                                                                                                                                                                                                                                                                                                                                                                                                                                                                                                                                                                                                                                                                                                                                                                                                                                                                                                                                                                                                                                                                                                                                                                                                                                                                                                                                                                                                                                                                                                                                                                                                                                                                                                                                                                                                                                                                                                                                                                                                                                                                                                       | 2        | 3        | 4        | 5        |   |   |      |          |  |  |  |  |      |          |          |  |  |  |     |          |          |          |  |  |     |          |          |          |          |  |     |          |          |          |          |          |     |          |          |          |          |          |     |          |          |          |          |          |     |          |          |          |          |          |     |          |          |          |          |          |      |          |          |          |          |          |      |          |          |          |          |          |      |          |          |          |          |          |      |          |          |          |          |          |      |          |          |          |          |          |      |          |          |          |          |          |      |          |          |          |          |          |      |          |          |          |          |          |      |          |          |          |          |          |      |          |          |          |          |          |      |          |          |          |          |          |      |          |          |          |          |          |      |          |          |          |          |          |      |          |          |          |          |          |      |          |          |          |          |          |      |          |          |          |          |          |      |          |          |          |          |          |  |   |   |   |   |    |     |          |  |  |  |  |     |          |          |  |  |  |     |          |          |          |  |  |     |          |          |          |          |  |      |          |          |          |          |          |      |          |          |          |          |          |      |          |          |          |          |          |
| 1 Ir                                                                                                            | 0.000000                                                                                                                                                                                                                                                                                                                                                                                                                                                                                                                                                                                                                                                                                                                                                                                                                                                                                                                                                                                                                                                                                                                                                                                                                                                                                                                                                                                                                                                                                                                                                                                                                                                                                                                                                                                                                                                                                                                                                                                                                                                                                                                                                                                                                                                                                                                                                                                                                                                                                                                                                                                                                                                                                                                                                                                                                                                                                                                                                                                                                                                                                                                                                                                                                                                                                                                                                                                                                                                                                                                                                                                                                                                                                                                                                |          |          |          |          |   |   |      |          |  |  |  |  |      |          |          |  |  |  |     |          |          |          |  |  |     |          |          |          |          |  |     |          |          |          |          |          |     |          |          |          |          |          |     |          |          |          |          |          |     |          |          |          |          |          |     |          |          |          |          |          |      |          |          |          |          |          |      |          |          |          |          |          |      |          |          |          |          |          |      |          |          |          |          |          |      |          |          |          |          |          |      |          |          |          |          |          |      |          |          |          |          |          |      |          |          |          |          |          |      |          |          |          |          |          |      |          |          |          |          |          |      |          |          |          |          |          |      |          |          |          |          |          |      |          |          |          |          |          |      |          |          |          |          |          |      |          |          |          |          |          |      |          |          |          |          |          |      |          |          |          |          |          |  |   |   |   |   |    |     |          |  |  |  |  |     |          |          |  |  |  |     |          |          |          |  |  |     |          |          |          |          |  |      |          |          |          |          |          |      |          |          |          |          |          |      |          |          |          |          |          |
| 2 Fe                                                                                                            | 3.006792                                                                                                                                                                                                                                                                                                                                                                                                                                                                                                                                                                                                                                                                                                                                                                                                                                                                                                                                                                                                                                                                                                                                                                                                                                                                                                                                                                                                                                                                                                                                                                                                                                                                                                                                                                                                                                                                                                                                                                                                                                                                                                                                                                                                                                                                                                                                                                                                                                                                                                                                                                                                                                                                                                                                                                                                                                                                                                                                                                                                                                                                                                                                                                                                                                                                                                                                                                                                                                                                                                                                                                                                                                                                                                                                                | 0.000000 |          |          |          |   |   |      |          |  |  |  |  |      |          |          |  |  |  |     |          |          |          |  |  |     |          |          |          |          |  |     |          |          |          |          |          |     |          |          |          |          |          |     |          |          |          |          |          |     |          |          |          |          |          |     |          |          |          |          |          |      |          |          |          |          |          |      |          |          |          |          |          |      |          |          |          |          |          |      |          |          |          |          |          |      |          |          |          |          |          |      |          |          |          |          |          |      |          |          |          |          |          |      |          |          |          |          |          |      |          |          |          |          |          |      |          |          |          |          |          |      |          |          |          |          |          |      |          |          |          |          |          |      |          |          |          |          |          |      |          |          |          |          |          |      |          |          |          |          |          |      |          |          |          |          |          |      |          |          |          |          |          |  |   |   |   |   |    |     |          |  |  |  |  |     |          |          |  |  |  |     |          |          |          |  |  |     |          |          |          |          |  |      |          |          |          |          |          |      |          |          |          |          |          |      |          |          |          |          |          |
| 3 C                                                                                                             | 4.476373                                                                                                                                                                                                                                                                                                                                                                                                                                                                                                                                                                                                                                                                                                                                                                                                                                                                                                                                                                                                                                                                                                                                                                                                                                                                                                                                                                                                                                                                                                                                                                                                                                                                                                                                                                                                                                                                                                                                                                                                                                                                                                                                                                                                                                                                                                                                                                                                                                                                                                                                                                                                                                                                                                                                                                                                                                                                                                                                                                                                                                                                                                                                                                                                                                                                                                                                                                                                                                                                                                                                                                                                                                                                                                                                                | 1.846560 | 0.000000 |          |          |   |   |      |          |  |  |  |  |      |          |          |  |  |  |     |          |          |          |  |  |     |          |          |          |          |  |     |          |          |          |          |          |     |          |          |          |          |          |     |          |          |          |          |          |     |          |          |          |          |          |     |          |          |          |          |          |      |          |          |          |          |          |      |          |          |          |          |          |      |          |          |          |          |          |      |          |          |          |          |          |      |          |          |          |          |          |      |          |          |          |          |          |      |          |          |          |          |          |      |          |          |          |          |          |      |          |          |          |          |          |      |          |          |          |          |          |      |          |          |          |          |          |      |          |          |          |          |          |      |          |          |          |          |          |      |          |          |          |          |          |      |          |          |          |          |          |      |          |          |          |          |          |      |          |          |          |          |          |  |   |   |   |   |    |     |          |  |  |  |  |     |          |          |  |  |  |     |          |          |          |  |  |     |          |          |          |          |  |      |          |          |          |          |          |      |          |          |          |          |          |      |          |          |          |          |          |
| 4 C                                                                                                             | 1.990258                                                                                                                                                                                                                                                                                                                                                                                                                                                                                                                                                                                                                                                                                                                                                                                                                                                                                                                                                                                                                                                                                                                                                                                                                                                                                                                                                                                                                                                                                                                                                                                                                                                                                                                                                                                                                                                                                                                                                                                                                                                                                                                                                                                                                                                                                                                                                                                                                                                                                                                                                                                                                                                                                                                                                                                                                                                                                                                                                                                                                                                                                                                                                                                                                                                                                                                                                                                                                                                                                                                                                                                                                                                                                                                                                | 2.002047 | 3.843495 | 0.000000 |          |   |   |      |          |  |  |  |  |      |          |          |  |  |  |     |          |          |          |  |  |     |          |          |          |          |  |     |          |          |          |          |          |     |          |          |          |          |          |     |          |          |          |          |          |     |          |          |          |          |          |     |          |          |          |          |          |      |          |          |          |          |          |      |          |          |          |          |          |      |          |          |          |          |          |      |          |          |          |          |          |      |          |          |          |          |          |      |          |          |          |          |          |      |          |          |          |          |          |      |          |          |          |          |          |      |          |          |          |          |          |      |          |          |          |          |          |      |          |          |          |          |          |      |          |          |          |          |          |      |          |          |          |          |          |      |          |          |          |          |          |      |          |          |          |          |          |      |          |          |          |          |          |      |          |          |          |          |          |  |   |   |   |   |    |     |          |  |  |  |  |     |          |          |  |  |  |     |          |          |          |  |  |     |          |          |          |          |  |      |          |          |          |          |          |      |          |          |          |          |          |      |          |          |          |          |          |
| 5 O                                                                                                             | 2.899999                                                                                                                                                                                                                                                                                                                                                                                                                                                                                                                                                                                                                                                                                                                                                                                                                                                                                                                                                                                                                                                                                                                                                                                                                                                                                                                                                                                                                                                                                                                                                                                                                                                                                                                                                                                                                                                                                                                                                                                                                                                                                                                                                                                                                                                                                                                                                                                                                                                                                                                                                                                                                                                                                                                                                                                                                                                                                                                                                                                                                                                                                                                                                                                                                                                                                                                                                                                                                                                                                                                                                                                                                                                                                                                                                | 2.935007 | 4.758710 | 1.187279 | 0.000000 |   |   |      |          |  |  |  |  |      |          |          |  |  |  |     |          |          |          |  |  |     |          |          |          |          |  |     |          |          |          |          |          |     |          |          |          |          |          |     |          |          |          |          |          |     |          |          |          |          |          |     |          |          |          |          |          |      |          |          |          |          |          |      |          |          |          |          |          |      |          |          |          |          |          |      |          |          |          |          |          |      |          |          |          |          |          |      |          |          |          |          |          |      |          |          |          |          |          |      |          |          |          |          |          |      |          |          |          |          |          |      |          |          |          |          |          |      |          |          |          |          |          |      |          |          |          |          |          |      |          |          |          |          |          |      |          |          |          |          |          |      |          |          |          |          |          |      |          |          |          |          |          |      |          |          |          |          |          |  |   |   |   |   |    |     |          |  |  |  |  |     |          |          |  |  |  |     |          |          |          |  |  |     |          |          |          |          |  |      |          |          |          |          |          |      |          |          |          |          |          |      |          |          |          |          |          |
| 6 O                                                                                                             | 5.541232                                                                                                                                                                                                                                                                                                                                                                                                                                                                                                                                                                                                                                                                                                                                                                                                                                                                                                                                                                                                                                                                                                                                                                                                                                                                                                                                                                                                                                                                                                                                                                                                                                                                                                                                                                                                                                                                                                                                                                                                                                                                                                                                                                                                                                                                                                                                                                                                                                                                                                                                                                                                                                                                                                                                                                                                                                                                                                                                                                                                                                                                                                                                                                                                                                                                                                                                                                                                                                                                                                                                                                                                                                                                                                                                                | 2.977324 | 1.135516 | 4.977294 | 5.867961 |   |   |      |          |  |  |  |  |      |          |          |  |  |  |     |          |          |          |  |  |     |          |          |          |          |  |     |          |          |          |          |          |     |          |          |          |          |          |     |          |          |          |          |          |     |          |          |          |          |          |     |          |          |          |          |          |      |          |          |          |          |          |      |          |          |          |          |          |      |          |          |          |          |          |      |          |          |          |          |          |      |          |          |          |          |          |      |          |          |          |          |          |      |          |          |          |          |          |      |          |          |          |          |          |      |          |          |          |          |          |      |          |          |          |          |          |      |          |          |          |          |          |      |          |          |          |          |          |      |          |          |          |          |          |      |          |          |          |          |          |      |          |          |          |          |          |      |          |          |          |          |          |      |          |          |          |          |          |  |   |   |   |   |    |     |          |  |  |  |  |     |          |          |  |  |  |     |          |          |          |  |  |     |          |          |          |          |  |      |          |          |          |          |          |      |          |          |          |          |          |      |          |          |          |          |          |
| 7 C                                                                                                             | 4.063755                                                                                                                                                                                                                                                                                                                                                                                                                                                                                                                                                                                                                                                                                                                                                                                                                                                                                                                                                                                                                                                                                                                                                                                                                                                                                                                                                                                                                                                                                                                                                                                                                                                                                                                                                                                                                                                                                                                                                                                                                                                                                                                                                                                                                                                                                                                                                                                                                                                                                                                                                                                                                                                                                                                                                                                                                                                                                                                                                                                                                                                                                                                                                                                                                                                                                                                                                                                                                                                                                                                                                                                                                                                                                                                                                | 1.762946 | 2.693992 | 2.608837 | 3.030895 |   |   |      |          |  |  |  |  |      |          |          |  |  |  |     |          |          |          |  |  |     |          |          |          |          |  |     |          |          |          |          |          |     |          |          |          |          |          |     |          |          |          |          |          |     |          |          |          |          |          |     |          |          |          |          |          |      |          |          |          |          |          |      |          |          |          |          |          |      |          |          |          |          |          |      |          |          |          |          |          |      |          |          |          |          |          |      |          |          |          |          |          |      |          |          |          |          |          |      |          |          |          |          |          |      |          |          |          |          |          |      |          |          |          |          |          |      |          |          |          |          |          |      |          |          |          |          |          |      |          |          |          |          |          |      |          |          |          |          |          |      |          |          |          |          |          |      |          |          |          |          |          |      |          |          |          |          |          |  |   |   |   |   |    |     |          |  |  |  |  |     |          |          |  |  |  |     |          |          |          |  |  |     |          |          |          |          |  |      |          |          |          |          |          |      |          |          |          |          |          |      |          |          |          |          |          |
| 8 O                                                                                                             | 4.942050                                                                                                                                                                                                                                                                                                                                                                                                                                                                                                                                                                                                                                                                                                                                                                                                                                                                                                                                                                                                                                                                                                                                                                                                                                                                                                                                                                                                                                                                                                                                                                                                                                                                                                                                                                                                                                                                                                                                                                                                                                                                                                                                                                                                                                                                                                                                                                                                                                                                                                                                                                                                                                                                                                                                                                                                                                                                                                                                                                                                                                                                                                                                                                                                                                                                                                                                                                                                                                                                                                                                                                                                                                                                                                                                                | 2.900201 | 3.623583 | 3.435051 | 3.569081 |   |   |      |          |  |  |  |  |      |          |          |  |  |  |     |          |          |          |  |  |     |          |          |          |          |  |     |          |          |          |          |          |     |          |          |          |          |          |     |          |          |          |          |          |     |          |          |          |          |          |     |          |          |          |          |          |      |          |          |          |          |          |      |          |          |          |          |          |      |          |          |          |          |          |      |          |          |          |          |          |      |          |          |          |          |          |      |          |          |          |          |          |      |          |          |          |          |          |      |          |          |          |          |          |      |          |          |          |          |          |      |          |          |          |          |          |      |          |          |          |          |          |      |          |          |          |          |          |      |          |          |          |          |          |      |          |          |          |          |          |      |          |          |          |          |          |      |          |          |          |          |          |      |          |          |          |          |          |  |   |   |   |   |    |     |          |  |  |  |  |     |          |          |  |  |  |     |          |          |          |  |  |     |          |          |          |          |  |      |          |          |          |          |          |      |          |          |          |          |          |      |          |          |          |          |          |
| 9 C                                                                                                             | 4.063799                                                                                                                                                                                                                                                                                                                                                                                                                                                                                                                                                                                                                                                                                                                                                                                                                                                                                                                                                                                                                                                                                                                                                                                                                                                                                                                                                                                                                                                                                                                                                                                                                                                                                                                                                                                                                                                                                                                                                                                                                                                                                                                                                                                                                                                                                                                                                                                                                                                                                                                                                                                                                                                                                                                                                                                                                                                                                                                                                                                                                                                                                                                                                                                                                                                                                                                                                                                                                                                                                                                                                                                                                                                                                                                                                | 1.762959 | 2.694136 | 2.608551 | 3.030452 |   |   |      |          |  |  |  |  |      |          |          |  |  |  |     |          |          |          |  |  |     |          |          |          |          |  |     |          |          |          |          |          |     |          |          |          |          |          |     |          |          |          |          |          |     |          |          |          |          |          |     |          |          |          |          |          |      |          |          |          |          |          |      |          |          |          |          |          |      |          |          |          |          |          |      |          |          |          |          |          |      |          |          |          |          |          |      |          |          |          |          |          |      |          |          |          |          |          |      |          |          |          |          |          |      |          |          |          |          |          |      |          |          |          |          |          |      |          |          |          |          |          |      |          |          |          |          |          |      |          |          |          |          |          |      |          |          |          |          |          |      |          |          |          |          |          |      |          |          |          |          |          |      |          |          |          |          |          |  |   |   |   |   |    |     |          |  |  |  |  |     |          |          |  |  |  |     |          |          |          |  |  |     |          |          |          |          |  |      |          |          |          |          |          |      |          |          |          |          |          |      |          |          |          |          |          |
| 10 O                                                                                                            | 4.942451                                                                                                                                                                                                                                                                                                                                                                                                                                                                                                                                                                                                                                                                                                                                                                                                                                                                                                                                                                                                                                                                                                                                                                                                                                                                                                                                                                                                                                                                                                                                                                                                                                                                                                                                                                                                                                                                                                                                                                                                                                                                                                                                                                                                                                                                                                                                                                                                                                                                                                                                                                                                                                                                                                                                                                                                                                                                                                                                                                                                                                                                                                                                                                                                                                                                                                                                                                                                                                                                                                                                                                                                                                                                                                                                                | 2.900230 | 3.623906 | 3.434613 | 3.568098 |   |   |      |          |  |  |  |  |      |          |          |  |  |  |     |          |          |          |  |  |     |          |          |          |          |  |     |          |          |          |          |          |     |          |          |          |          |          |     |          |          |          |          |          |     |          |          |          |          |          |     |          |          |          |          |          |      |          |          |          |          |          |      |          |          |          |          |          |      |          |          |          |          |          |      |          |          |          |          |          |      |          |          |          |          |          |      |          |          |          |          |          |      |          |          |          |          |          |      |          |          |          |          |          |      |          |          |          |          |          |      |          |          |          |          |          |      |          |          |          |          |          |      |          |          |          |          |          |      |          |          |          |          |          |      |          |          |          |          |          |      |          |          |          |          |          |      |          |          |          |          |          |      |          |          |          |          |          |  |   |   |   |   |    |     |          |  |  |  |  |     |          |          |  |  |  |     |          |          |          |  |  |     |          |          |          |          |  |      |          |          |          |          |          |      |          |          |          |          |          |      |          |          |          |          |          |
| 11 H                                                                                                            | 3.103815                                                                                                                                                                                                                                                                                                                                                                                                                                                                                                                                                                                                                                                                                                                                                                                                                                                                                                                                                                                                                                                                                                                                                                                                                                                                                                                                                                                                                                                                                                                                                                                                                                                                                                                                                                                                                                                                                                                                                                                                                                                                                                                                                                                                                                                                                                                                                                                                                                                                                                                                                                                                                                                                                                                                                                                                                                                                                                                                                                                                                                                                                                                                                                                                                                                                                                                                                                                                                                                                                                                                                                                                                                                                                                                                                | 5.721029 | 6.740596 | 4.966502 | 5.716732 |   |   |      |          |  |  |  |  |      |          |          |  |  |  |     |          |          |          |  |  |     |          |          |          |          |  |     |          |          |          |          |          |     |          |          |          |          |          |     |          |          |          |          |          |     |          |          |          |          |          |     |          |          |          |          |          |      |          |          |          |          |          |      |          |          |          |          |          |      |          |          |          |          |          |      |          |          |          |          |          |      |          |          |          |          |          |      |          |          |          |          |          |      |          |          |          |          |          |      |          |          |          |          |          |      |          |          |          |          |          |      |          |          |          |          |          |      |          |          |          |          |          |      |          |          |          |          |          |      |          |          |          |          |          |      |          |          |          |          |          |      |          |          |          |          |          |      |          |          |          |          |          |      |          |          |          |          |          |  |   |   |   |   |    |     |          |  |  |  |  |     |          |          |  |  |  |     |          |          |          |  |  |     |          |          |          |          |  |      |          |          |          |          |          |      |          |          |          |          |          |      |          |          |          |          |          |
| 12 C                                                                                                            | 2.365225                                                                                                                                                                                                                                                                                                                                                                                                                                                                                                                                                                                                                                                                                                                                                                                                                                                                                                                                                                                                                                                                                                                                                                                                                                                                                                                                                                                                                                                                                                                                                                                                                                                                                                                                                                                                                                                                                                                                                                                                                                                                                                                                                                                                                                                                                                                                                                                                                                                                                                                                                                                                                                                                                                                                                                                                                                                                                                                                                                                                                                                                                                                                                                                                                                                                                                                                                                                                                                                                                                                                                                                                                                                                                                                                                | 5.250933 | 6.489563 | 4.221932 | 4.880502 |   |   |      |          |  |  |  |  |      |          |          |  |  |  |     |          |          |          |  |  |     |          |          |          |          |  |     |          |          |          |          |          |     |          |          |          |          |          |     |          |          |          |          |          |     |          |          |          |          |          |     |          |          |          |          |          |      |          |          |          |          |          |      |          |          |          |          |          |      |          |          |          |          |          |      |          |          |          |          |          |      |          |          |          |          |          |      |          |          |          |          |          |      |          |          |          |          |          |      |          |          |          |          |          |      |          |          |          |          |          |      |          |          |          |          |          |      |          |          |          |          |          |      |          |          |          |          |          |      |          |          |          |          |          |      |          |          |          |          |          |      |          |          |          |          |          |      |          |          |          |          |          |      |          |          |          |          |          |  |   |   |   |   |    |     |          |  |  |  |  |     |          |          |  |  |  |     |          |          |          |  |  |     |          |          |          |          |  |      |          |          |          |          |          |      |          |          |          |          |          |      |          |          |          |          |          |
| 13 C                                                                                                            | 2.364781                                                                                                                                                                                                                                                                                                                                                                                                                                                                                                                                                                                                                                                                                                                                                                                                                                                                                                                                                                                                                                                                                                                                                                                                                                                                                                                                                                                                                                                                                                                                                                                                                                                                                                                                                                                                                                                                                                                                                                                                                                                                                                                                                                                                                                                                                                                                                                                                                                                                                                                                                                                                                                                                                                                                                                                                                                                                                                                                                                                                                                                                                                                                                                                                                                                                                                                                                                                                                                                                                                                                                                                                                                                                                                                                                | 5.249790 | 6.489342 | 4.219619 | 4.877333 |   |   |      |          |  |  |  |  |      |          |          |  |  |  |     |          |          |          |  |  |     |          |          |          |          |  |     |          |          |          |          |          |     |          |          |          |          |          |     |          |          |          |          |          |     |          |          |          |          |          |     |          |          |          |          |          |      |          |          |          |          |          |      |          |          |          |          |          |      |          |          |          |          |          |      |          |          |          |          |          |      |          |          |          |          |          |      |          |          |          |          |          |      |          |          |          |          |          |      |          |          |          |          |          |      |          |          |          |          |          |      |          |          |          |          |          |      |          |          |          |          |          |      |          |          |          |          |          |      |          |          |          |          |          |      |          |          |          |          |          |      |          |          |          |          |          |      |          |          |          |          |          |      |          |          |          |          |          |  |   |   |   |   |    |     |          |  |  |  |  |     |          |          |  |  |  |     |          |          |          |  |  |     |          |          |          |          |  |      |          |          |          |          |          |      |          |          |          |          |          |      |          |          |          |          |          |
| 14 H                                                                                                            | 2.933353                                                                                                                                                                                                                                                                                                                                                                                                                                                                                                                                                                                                                                                                                                                                                                                                                                                                                                                                                                                                                                                                                                                                                                                                                                                                                                                                                                                                                                                                                                                                                                                                                                                                                                                                                                                                                                                                                                                                                                                                                                                                                                                                                                                                                                                                                                                                                                                                                                                                                                                                                                                                                                                                                                                                                                                                                                                                                                                                                                                                                                                                                                                                                                                                                                                                                                                                                                                                                                                                                                                                                                                                                                                                                                                                                | 5.289641 | 6.772203 | 3.901712 | 4.163929 |   |   |      |          |  |  |  |  |      |          |          |  |  |  |     |          |          |          |  |  |     |          |          |          |          |  |     |          |          |          |          |          |     |          |          |          |          |          |     |          |          |          |          |          |     |          |          |          |          |          |     |          |          |          |          |          |      |          |          |          |          |          |      |          |          |          |          |          |      |          |          |          |          |          |      |          |          |          |          |          |      |          |          |          |          |          |      |          |          |          |          |          |      |          |          |          |          |          |      |          |          |          |          |          |      |          |          |          |          |          |      |          |          |          |          |          |      |          |          |          |          |          |      |          |          |          |          |          |      |          |          |          |          |          |      |          |          |          |          |          |      |          |          |          |          |          |      |          |          |          |          |          |      |          |          |          |          |          |  |   |   |   |   |    |     |          |  |  |  |  |     |          |          |  |  |  |     |          |          |          |  |  |     |          |          |          |          |  |      |          |          |          |          |          |      |          |          |          |          |          |      |          |          |          |          |          |
| 15 H                                                                                                            | 3.103105                                                                                                                                                                                                                                                                                                                                                                                                                                                                                                                                                                                                                                                                                                                                                                                                                                                                                                                                                                                                                                                                                                                                                                                                                                                                                                                                                                                                                                                                                                                                                                                                                                                                                                                                                                                                                                                                                                                                                                                                                                                                                                                                                                                                                                                                                                                                                                                                                                                                                                                                                                                                                                                                                                                                                                                                                                                                                                                                                                                                                                                                                                                                                                                                                                                                                                                                                                                                                                                                                                                                                                                                                                                                                                                                                | 5.718928 | 6.740063 | 4.962703 | 5.711553 |   |   |      |          |  |  |  |  |      |          |          |  |  |  |     |          |          |          |  |  |     |          |          |          |          |  |     |          |          |          |          |          |     |          |          |          |          |          |     |          |          |          |          |          |     |          |          |          |          |          |     |          |          |          |          |          |      |          |          |          |          |          |      |          |          |          |          |          |      |          |          |          |          |          |      |          |          |          |          |          |      |          |          |          |          |          |      |          |          |          |          |          |      |          |          |          |          |          |      |          |          |          |          |          |      |          |          |          |          |          |      |          |          |          |          |          |      |          |          |          |          |          |      |          |          |          |          |          |      |          |          |          |          |          |      |          |          |          |          |          |      |          |          |          |          |          |      |          |          |          |          |          |      |          |          |          |          |          |  |   |   |   |   |    |     |          |  |  |  |  |     |          |          |  |  |  |     |          |          |          |  |  |     |          |          |          |          |  |      |          |          |          |          |          |      |          |          |          |          |          |      |          |          |          |          |          |
| 16 C                                                                                                            | 2.194331                                                                                                                                                                                                                                                                                                                                                                                                                                                                                                                                                                                                                                                                                                                                                                                                                                                                                                                                                                                                                                                                                                                                                                                                                                                                                                                                                                                                                                                                                                                                                                                                                                                                                                                                                                                                                                                                                                                                                                                                                                                                                                                                                                                                                                                                                                                                                                                                                                                                                                                                                                                                                                                                                                                                                                                                                                                                                                                                                                                                                                                                                                                                                                                                                                                                                                                                                                                                                                                                                                                                                                                                                                                                                                                                                | 4.943246 | 6.447323 | 3.519576 | 3.905335 |   |   |      |          |  |  |  |  |      |          |          |  |  |  |     |          |          |          |  |  |     |          |          |          |          |  |     |          |          |          |          |          |     |          |          |          |          |          |     |          |          |          |          |          |     |          |          |          |          |          |     |          |          |          |          |          |      |          |          |          |          |          |      |          |          |          |          |          |      |          |          |          |          |          |      |          |          |          |          |          |      |          |          |          |          |          |      |          |          |          |          |          |      |          |          |          |          |          |      |          |          |          |          |          |      |          |          |          |          |          |      |          |          |          |          |          |      |          |          |          |          |          |      |          |          |          |          |          |      |          |          |          |          |          |      |          |          |          |          |          |      |          |          |          |          |          |      |          |          |          |          |          |      |          |          |          |          |          |  |   |   |   |   |    |     |          |  |  |  |  |     |          |          |  |  |  |     |          |          |          |  |  |     |          |          |          |          |  |      |          |          |          |          |          |      |          |          |          |          |          |      |          |          |          |          |          |
| 17 H                                                                                                            | 2.933601                                                                                                                                                                                                                                                                                                                                                                                                                                                                                                                                                                                                                                                                                                                                                                                                                                                                                                                                                                                                                                                                                                                                                                                                                                                                                                                                                                                                                                                                                                                                                                                                                                                                                                                                                                                                                                                                                                                                                                                                                                                                                                                                                                                                                                                                                                                                                                                                                                                                                                                                                                                                                                                                                                                                                                                                                                                                                                                                                                                                                                                                                                                                                                                                                                                                                                                                                                                                                                                                                                                                                                                                                                                                                                                                                | 5.287754 | 6.773098 | 3.895586 | 4.153951 |   |   |      |          |  |  |  |  |      |          |          |  |  |  |     |          |          |          |  |  |     |          |          |          |          |  |     |          |          |          |          |          |     |          |          |          |          |          |     |          |          |          |          |          |     |          |          |          |          |          |     |          |          |          |          |          |      |          |          |          |          |          |      |          |          |          |          |          |      |          |          |          |          |          |      |          |          |          |          |          |      |          |          |          |          |          |      |          |          |          |          |          |      |          |          |          |          |          |      |          |          |          |          |          |      |          |          |          |          |          |      |          |          |          |          |          |      |          |          |          |          |          |      |          |          |          |          |          |      |          |          |          |          |          |      |          |          |          |          |          |      |          |          |          |          |          |      |          |          |          |          |          |      |          |          |          |          |          |  |   |   |   |   |    |     |          |  |  |  |  |     |          |          |  |  |  |     |          |          |          |  |  |     |          |          |          |          |  |      |          |          |          |          |          |      |          |          |          |          |          |      |          |          |          |          |          |
| 18 C                                                                                                            | 2.173431                                                                                                                                                                                                                                                                                                                                                                                                                                                                                                                                                                                                                                                                                                                                                                                                                                                                                                                                                                                                                                                                                                                                                                                                                                                                                                                                                                                                                                                                                                                                                                                                                                                                                                                                                                                                                                                                                                                                                                                                                                                                                                                                                                                                                                                                                                                                                                                                                                                                                                                                                                                                                                                                                                                                                                                                                                                                                                                                                                                                                                                                                                                                                                                                                                                                                                                                                                                                                                                                                                                                                                                                                                                                                                                                                | 4.845520 | 6.517167 | 3.114180 | 3.257404 |   |   |      |          |  |  |  |  |      |          |          |  |  |  |     |          |          |          |  |  |     |          |          |          |          |  |     |          |          |          |          |          |     |          |          |          |          |          |     |          |          |          |          |          |     |          |          |          |          |          |     |          |          |          |          |          |      |          |          |          |          |          |      |          |          |          |          |          |      |          |          |          |          |          |      |          |          |          |          |          |      |          |          |          |          |          |      |          |          |          |          |          |      |          |          |          |          |          |      |          |          |          |          |          |      |          |          |          |          |          |      |          |          |          |          |          |      |          |          |          |          |          |      |          |          |          |          |          |      |          |          |          |          |          |      |          |          |          |          |          |      |          |          |          |          |          |      |          |          |          |          |          |      |          |          |          |          |          |  |   |   |   |   |    |     |          |  |  |  |  |     |          |          |  |  |  |     |          |          |          |  |  |     |          |          |          |          |  |      |          |          |          |          |          |      |          |          |          |          |          |      |          |          |          |          |          |
| 19 H                                                                                                            | 2.848146                                                                                                                                                                                                                                                                                                                                                                                                                                                                                                                                                                                                                                                                                                                                                                                                                                                                                                                                                                                                                                                                                                                                                                                                                                                                                                                                                                                                                                                                                                                                                                                                                                                                                                                                                                                                                                                                                                                                                                                                                                                                                                                                                                                                                                                                                                                                                                                                                                                                                                                                                                                                                                                                                                                                                                                                                                                                                                                                                                                                                                                                                                                                                                                                                                                                                                                                                                                                                                                                                                                                                                                                                                                                                                                                                | 5.032084 | 6.818890 | 3.092229 | 2.827886 |   |   |      |          |  |  |  |  |      |          |          |  |  |  |     |          |          |          |  |  |     |          |          |          |          |  |     |          |          |          |          |          |     |          |          |          |          |          |     |          |          |          |          |          |     |          |          |          |          |          |     |          |          |          |          |          |      |          |          |          |          |          |      |          |          |          |          |          |      |          |          |          |          |          |      |          |          |          |          |          |      |          |          |          |          |          |      |          |          |          |          |          |      |          |          |          |          |          |      |          |          |          |          |          |      |          |          |          |          |          |      |          |          |          |          |          |      |          |          |          |          |          |      |          |          |          |          |          |      |          |          |          |          |          |      |          |          |          |          |          |      |          |          |          |          |          |      |          |          |          |          |          |      |          |          |          |          |          |  |   |   |   |   |    |     |          |  |  |  |  |     |          |          |  |  |  |     |          |          |          |  |  |     |          |          |          |          |  |      |          |          |          |          |          |      |          |          |          |          |          |      |          |          |          |          |          |
| 20 C                                                                                                            | 2.194387                                                                                                                                                                                                                                                                                                                                                                                                                                                                                                                                                                                                                                                                                                                                                                                                                                                                                                                                                                                                                                                                                                                                                                                                                                                                                                                                                                                                                                                                                                                                                                                                                                                                                                                                                                                                                                                                                                                                                                                                                                                                                                                                                                                                                                                                                                                                                                                                                                                                                                                                                                                                                                                                                                                                                                                                                                                                                                                                                                                                                                                                                                                                                                                                                                                                                                                                                                                                                                                                                                                                                                                                                                                                                                                                                | 4.944591 | 6.447096 | 3.523428 | 3.911187 |   |   |      |          |  |  |  |  |      |          |          |  |  |  |     |          |          |          |  |  |     |          |          |          |          |  |     |          |          |          |          |          |     |          |          |          |          |          |     |          |          |          |          |          |     |          |          |          |          |          |     |          |          |          |          |          |      |          |          |          |          |          |      |          |          |          |          |          |      |          |          |          |          |          |      |          |          |          |          |          |      |          |          |          |          |          |      |          |          |          |          |          |      |          |          |          |          |          |      |          |          |          |          |          |      |          |          |          |          |          |      |          |          |          |          |          |      |          |          |          |          |          |      |          |          |          |          |          |      |          |          |          |          |          |      |          |          |          |          |          |      |          |          |          |          |          |      |          |          |          |          |          |      |          |          |          |          |          |  |   |   |   |   |    |     |          |  |  |  |  |     |          |          |  |  |  |     |          |          |          |  |  |     |          |          |          |          |  |      |          |          |          |          |          |      |          |          |          |          |          |      |          |          |          |          |          |
| 21 S                                                                                                            | 2.411410                                                                                                                                                                                                                                                                                                                                                                                                                                                                                                                                                                                                                                                                                                                                                                                                                                                                                                                                                                                                                                                                                                                                                                                                                                                                                                                                                                                                                                                                                                                                                                                                                                                                                                                                                                                                                                                                                                                                                                                                                                                                                                                                                                                                                                                                                                                                                                                                                                                                                                                                                                                                                                                                                                                                                                                                                                                                                                                                                                                                                                                                                                                                                                                                                                                                                                                                                                                                                                                                                                                                                                                                                                                                                                                                                | 2.417563 | 3.163554 | 2.875303 | 3.934732 |   |   |      |          |  |  |  |  |      |          |          |  |  |  |     |          |          |          |  |  |     |          |          |          |          |  |     |          |          |          |          |          |     |          |          |          |          |          |     |          |          |          |          |          |     |          |          |          |          |          |     |          |          |          |          |          |      |          |          |          |          |          |      |          |          |          |          |          |      |          |          |          |          |          |      |          |          |          |          |          |      |          |          |          |          |          |      |          |          |          |          |          |      |          |          |          |          |          |      |          |          |          |          |          |      |          |          |          |          |          |      |          |          |          |          |          |      |          |          |          |          |          |      |          |          |          |          |          |      |          |          |          |          |          |      |          |          |          |          |          |      |          |          |          |          |          |      |          |          |          |          |          |      |          |          |          |          |          |  |   |   |   |   |    |     |          |  |  |  |  |     |          |          |  |  |  |     |          |          |          |  |  |     |          |          |          |          |  |      |          |          |          |          |          |      |          |          |          |          |          |      |          |          |          |          |          |
| 22 S                                                                                                            | 2.411300                                                                                                                                                                                                                                                                                                                                                                                                                                                                                                                                                                                                                                                                                                                                                                                                                                                                                                                                                                                                                                                                                                                                                                                                                                                                                                                                                                                                                                                                                                                                                                                                                                                                                                                                                                                                                                                                                                                                                                                                                                                                                                                                                                                                                                                                                                                                                                                                                                                                                                                                                                                                                                                                                                                                                                                                                                                                                                                                                                                                                                                                                                                                                                                                                                                                                                                                                                                                                                                                                                                                                                                                                                                                                                                                                | 2.417643 | 3.163667 | 2.875126 | 3.934542 |   |   |      |          |  |  |  |  |      |          |          |  |  |  |     |          |          |          |  |  |     |          |          |          |          |  |     |          |          |          |          |          |     |          |          |          |          |          |     |          |          |          |          |          |     |          |          |          |          |          |     |          |          |          |          |          |      |          |          |          |          |          |      |          |          |          |          |          |      |          |          |          |          |          |      |          |          |          |          |          |      |          |          |          |          |          |      |          |          |          |          |          |      |          |          |          |          |          |      |          |          |          |          |          |      |          |          |          |          |          |      |          |          |          |          |          |      |          |          |          |          |          |      |          |          |          |          |          |      |          |          |          |          |          |      |          |          |          |          |          |      |          |          |          |          |          |      |          |          |          |          |          |      |          |          |          |          |          |  |   |   |   |   |    |     |          |  |  |  |  |     |          |          |  |  |  |     |          |          |          |  |  |     |          |          |          |          |  |      |          |          |          |          |          |      |          |          |          |          |          |      |          |          |          |          |          |
| 23 C                                                                                                            | 3.214965                                                                                                                                                                                                                                                                                                                                                                                                                                                                                                                                                                                                                                                                                                                                                                                                                                                                                                                                                                                                                                                                                                                                                                                                                                                                                                                                                                                                                                                                                                                                                                                                                                                                                                                                                                                                                                                                                                                                                                                                                                                                                                                                                                                                                                                                                                                                                                                                                                                                                                                                                                                                                                                                                                                                                                                                                                                                                                                                                                                                                                                                                                                                                                                                                                                                                                                                                                                                                                                                                                                                                                                                                                                                                                                                                | 3.132939 | 3.079014 | 4.082978 | 5.258045 |   |   |      |          |  |  |  |  |      |          |          |  |  |  |     |          |          |          |  |  |     |          |          |          |          |  |     |          |          |          |          |          |     |          |          |          |          |          |     |          |          |          |          |          |     |          |          |          |          |          |     |          |          |          |          |          |      |          |          |          |          |          |      |          |          |          |          |          |      |          |          |          |          |          |      |          |          |          |          |          |      |          |          |          |          |          |      |          |          |          |          |          |      |          |          |          |          |          |      |          |          |          |          |          |      |          |          |          |          |          |      |          |          |          |          |          |      |          |          |          |          |          |      |          |          |          |          |          |      |          |          |          |          |          |      |          |          |          |          |          |      |          |          |          |          |          |      |          |          |          |          |          |      |          |          |          |          |          |  |   |   |   |   |    |     |          |  |  |  |  |     |          |          |  |  |  |     |          |          |          |  |  |     |          |          |          |          |  |      |          |          |          |          |          |      |          |          |          |          |          |      |          |          |          |          |          |
| 24 C                                                                                                            | 3.214953                                                                                                                                                                                                                                                                                                                                                                                                                                                                                                                                                                                                                                                                                                                                                                                                                                                                                                                                                                                                                                                                                                                                                                                                                                                                                                                                                                                                                                                                                                                                                                                                                                                                                                                                                                                                                                                                                                                                                                                                                                                                                                                                                                                                                                                                                                                                                                                                                                                                                                                                                                                                                                                                                                                                                                                                                                                                                                                                                                                                                                                                                                                                                                                                                                                                                                                                                                                                                                                                                                                                                                                                                                                                                                                                                | 3.132940 | 3.079015 | 4.082926 | 5.257987 |   |   |      |          |  |  |  |  |      |          |          |  |  |  |     |          |          |          |  |  |     |          |          |          |          |  |     |          |          |          |          |          |     |          |          |          |          |          |     |          |          |          |          |          |     |          |          |          |          |          |     |          |          |          |          |          |      |          |          |          |          |          |      |          |          |          |          |          |      |          |          |          |          |          |      |          |          |          |          |          |      |          |          |          |          |          |      |          |          |          |          |          |      |          |          |          |          |          |      |          |          |          |          |          |      |          |          |          |          |          |      |          |          |          |          |          |      |          |          |          |          |          |      |          |          |          |          |          |      |          |          |          |          |          |      |          |          |          |          |          |      |          |          |          |          |          |      |          |          |          |          |          |      |          |          |          |          |          |  |   |   |   |   |    |     |          |  |  |  |  |     |          |          |  |  |  |     |          |          |          |  |  |     |          |          |          |          |  |      |          |          |          |          |          |      |          |          |          |          |          |      |          |          |          |          |          |
| 25 H                                                                                                            | 4.165253                                                                                                                                                                                                                                                                                                                                                                                                                                                                                                                                                                                                                                                                                                                                                                                                                                                                                                                                                                                                                                                                                                                                                                                                                                                                                                                                                                                                                                                                                                                                                                                                                                                                                                                                                                                                                                                                                                                                                                                                                                                                                                                                                                                                                                                                                                                                                                                                                                                                                                                                                                                                                                                                                                                                                                                                                                                                                                                                                                                                                                                                                                                                                                                                                                                                                                                                                                                                                                                                                                                                                                                                                                                                                                                                                | 4.060965 | 3.688951 | 5.085231 | 6.241570 |   |   |      |          |  |  |  |  |      |          |          |  |  |  |     |          |          |          |  |  |     |          |          |          |          |  |     |          |          |          |          |          |     |          |          |          |          |          |     |          |          |          |          |          |     |          |          |          |          |          |     |          |          |          |          |          |      |          |          |          |          |          |      |          |          |          |          |          |      |          |          |          |          |          |      |          |          |          |          |          |      |          |          |          |          |          |      |          |          |          |          |          |      |          |          |          |          |          |      |          |          |          |          |          |      |          |          |          |          |          |      |          |          |          |          |          |      |          |          |          |          |          |      |          |          |          |          |          |      |          |          |          |          |          |      |          |          |          |          |          |      |          |          |          |          |          |      |          |          |          |          |          |      |          |          |          |          |          |  |   |   |   |   |    |     |          |  |  |  |  |     |          |          |  |  |  |     |          |          |          |  |  |     |          |          |          |          |  |      |          |          |          |          |          |      |          |          |          |          |          |      |          |          |          |          |          |
| 26 H                                                                                                            | 4.165262                                                                                                                                                                                                                                                                                                                                                                                                                                                                                                                                                                                                                                                                                                                                                                                                                                                                                                                                                                                                                                                                                                                                                                                                                                                                                                                                                                                                                                                                                                                                                                                                                                                                                                                                                                                                                                                                                                                                                                                                                                                                                                                                                                                                                                                                                                                                                                                                                                                                                                                                                                                                                                                                                                                                                                                                                                                                                                                                                                                                                                                                                                                                                                                                                                                                                                                                                                                                                                                                                                                                                                                                                                                                                                                                                | 4.060948 | 3.688941 | 5.085297 | 6.241648 |   |   |      |          |  |  |  |  |      |          |          |  |  |  |     |          |          |          |  |  |     |          |          |          |          |  |     |          |          |          |          |          |     |          |          |          |          |          |     |          |          |          |          |          |     |          |          |          |          |          |     |          |          |          |          |          |      |          |          |          |          |          |      |          |          |          |          |          |      |          |          |          |          |          |      |          |          |          |          |          |      |          |          |          |          |          |      |          |          |          |          |          |      |          |          |          |          |          |      |          |          |          |          |          |      |          |          |          |          |          |      |          |          |          |          |          |      |          |          |          |          |          |      |          |          |          |          |          |      |          |          |          |          |          |      |          |          |          |          |          |      |          |          |          |          |          |      |          |          |          |          |          |      |          |          |          |          |          |  |   |   |   |   |    |     |          |  |  |  |  |     |          |          |  |  |  |     |          |          |          |  |  |     |          |          |          |          |  |      |          |          |          |          |          |      |          |          |          |          |          |      |          |          |          |          |          |
|                                                                                                                 | 6                                                                                                                                                                                                                                                                                                                                                                                                                                                                                                                                                                                                                                                                                                                                                                                                                                                                                                                                                                                                                                                                                                                                                                                                                                                                                                                                                                                                                                                                                                                                                                                                                                                                                                                                                                                                                                                                                                                                                                                                                                                                                                                                                                                                                                                                                                                                                                                                                                                                                                                                                                                                                                                                                                                                                                                                                                                                                                                                                                                                                                                                                                                                                                                                                                                                                                                                                                                                                                                                                                                                                                                                                                                                                                                                                       | 7        | 8        | 9        | 10       |   |   |      |          |  |  |  |  |      |          |          |  |  |  |     |          |          |          |  |  |     |          |          |          |          |  |     |          |          |          |          |          |     |          |          |          |          |          |     |          |          |          |          |          |     |          |          |          |          |          |     |          |          |          |          |          |      |          |          |          |          |          |      |          |          |          |          |          |      |          |          |          |          |          |      |          |          |          |          |          |      |          |          |          |          |          |      |          |          |          |          |          |      |          |          |          |          |          |      |          |          |          |          |          |      |          |          |          |          |          |      |          |          |          |          |          |      |          |          |          |          |          |      |          |          |          |          |          |      |          |          |          |          |          |      |          |          |          |          |          |      |          |          |          |          |          |      |          |          |          |          |          |      |          |          |          |          |          |  |   |   |   |   |    |     |          |  |  |  |  |     |          |          |  |  |  |     |          |          |          |  |  |     |          |          |          |          |  |      |          |          |          |          |          |      |          |          |          |          |          |      |          |          |          |          |          |
| 6 O                                                                                                             | 0.000000                                                                                                                                                                                                                                                                                                                                                                                                                                                                                                                                                                                                                                                                                                                                                                                                                                                                                                                                                                                                                                                                                                                                                                                                                                                                                                                                                                                                                                                                                                                                                                                                                                                                                                                                                                                                                                                                                                                                                                                                                                                                                                                                                                                                                                                                                                                                                                                                                                                                                                                                                                                                                                                                                                                                                                                                                                                                                                                                                                                                                                                                                                                                                                                                                                                                                                                                                                                                                                                                                                                                                                                                                                                                                                                                                |          |          |          |          |   |   |      |          |  |  |  |  |      |          |          |  |  |  |     |          |          |          |  |  |     |          |          |          |          |  |     |          |          |          |          |          |     |          |          |          |          |          |     |          |          |          |          |          |     |          |          |          |          |          |     |          |          |          |          |          |      |          |          |          |          |          |      |          |          |          |          |          |      |          |          |          |          |          |      |          |          |          |          |          |      |          |          |          |          |          |      |          |          |          |          |          |      |          |          |          |          |          |      |          |          |          |          |          |      |          |          |          |          |          |      |          |          |          |          |          |      |          |          |          |          |          |      |          |          |          |          |          |      |          |          |          |          |          |      |          |          |          |          |          |      |          |          |          |          |          |      |          |          |          |          |          |      |          |          |          |          |          |  |   |   |   |   |    |     |          |  |  |  |  |     |          |          |  |  |  |     |          |          |          |  |  |     |          |          |          |          |  |      |          |          |          |          |          |      |          |          |          |          |          |      |          |          |          |          |          |
| 7 C                                                                                                             | 3.585076                                                                                                                                                                                                                                                                                                                                                                                                                                                                                                                                                                                                                                                                                                                                                                                                                                                                                                                                                                                                                                                                                                                                                                                                                                                                                                                                                                                                                                                                                                                                                                                                                                                                                                                                                                                                                                                                                                                                                                                                                                                                                                                                                                                                                                                                                                                                                                                                                                                                                                                                                                                                                                                                                                                                                                                                                                                                                                                                                                                                                                                                                                                                                                                                                                                                                                                                                                                                                                                                                                                                                                                                                                                                                                                                                | 0.000000 |          |          |          |   |   |      |          |  |  |  |  |      |          |          |  |  |  |     |          |          |          |  |  |     |          |          |          |          |  |     |          |          |          |          |          |     |          |          |          |          |          |     |          |          |          |          |          |     |          |          |          |          |          |     |          |          |          |          |          |      |          |          |          |          |          |      |          |          |          |          |          |      |          |          |          |          |          |      |          |          |          |          |          |      |          |          |          |          |          |      |          |          |          |          |          |      |          |          |          |          |          |      |          |          |          |          |          |      |          |          |          |          |          |      |          |          |          |          |          |      |          |          |          |          |          |      |          |          |          |          |          |      |          |          |          |          |          |      |          |          |          |          |          |      |          |          |          |          |          |      |          |          |          |          |          |      |          |          |          |          |          |  |   |   |   |   |    |     |          |  |  |  |  |     |          |          |  |  |  |     |          |          |          |  |  |     |          |          |          |          |  |      |          |          |          |          |          |      |          |          |          |          |          |      |          |          |          |          |          |
| 8 O                                                                                                             | 4.344991                                                                                                                                                                                                                                                                                                                                                                                                                                                                                                                                                                                                                                                                                                                                                                                                                                                                                                                                                                                                                                                                                                                                                                                                                                                                                                                                                                                                                                                                                                                                                                                                                                                                                                                                                                                                                                                                                                                                                                                                                                                                                                                                                                                                                                                                                                                                                                                                                                                                                                                                                                                                                                                                                                                                                                                                                                                                                                                                                                                                                                                                                                                                                                                                                                                                                                                                                                                                                                                                                                                                                                                                                                                                                                                                                | 1.137667 | 0.000000 |          |          |   |   |      |          |  |  |  |  |      |          |          |  |  |  |     |          |          |          |  |  |     |          |          |          |          |  |     |          |          |          |          |          |     |          |          |          |          |          |     |          |          |          |          |          |     |          |          |          |          |          |     |          |          |          |          |          |      |          |          |          |          |          |      |          |          |          |          |          |      |          |          |          |          |          |      |          |          |          |          |          |      |          |          |          |          |          |      |          |          |          |          |          |      |          |          |          |          |          |      |          |          |          |          |          |      |          |          |          |          |          |      |          |          |          |          |          |      |          |          |          |          |          |      |          |          |          |          |          |      |          |          |          |          |          |      |          |          |          |          |          |      |          |          |          |          |          |      |          |          |          |          |          |      |          |          |          |          |          |  |   |   |   |   |    |     |          |  |  |  |  |     |          |          |  |  |  |     |          |          |          |  |  |     |          |          |          |          |  |      |          |          |          |          |          |      |          |          |          |          |          |      |          |          |          |          |          |
| 9 C                                                                                                             | 3.585254                                                                                                                                                                                                                                                                                                                                                                                                                                                                                                                                                                                                                                                                                                                                                                                                                                                                                                                                                                                                                                                                                                                                                                                                                                                                                                                                                                                                                                                                                                                                                                                                                                                                                                                                                                                                                                                                                                                                                                                                                                                                                                                                                                                                                                                                                                                                                                                                                                                                                                                                                                                                                                                                                                                                                                                                                                                                                                                                                                                                                                                                                                                                                                                                                                                                                                                                                                                                                                                                                                                                                                                                                                                                                                                                                | 2.585545 | 3.519197 | 0.000000 |          |   |   |      |          |  |  |  |  |      |          |          |  |  |  |     |          |          |          |  |  |     |          |          |          |          |  |     |          |          |          |          |          |     |          |          |          |          |          |     |          |          |          |          |          |     |          |          |          |          |          |     |          |          |          |          |          |      |          |          |          |          |          |      |          |          |          |          |          |      |          |          |          |          |          |      |          |          |          |          |          |      |          |          |          |          |          |      |          |          |          |          |          |      |          |          |          |          |          |      |          |          |          |          |          |      |          |          |          |          |          |      |          |          |          |          |          |      |          |          |          |          |          |      |          |          |          |          |          |      |          |          |          |          |          |      |          |          |          |          |          |      |          |          |          |          |          |      |          |          |          |          |          |      |          |          |          |          |          |  |   |   |   |   |    |     |          |  |  |  |  |     |          |          |  |  |  |     |          |          |          |  |  |     |          |          |          |          |  |      |          |          |          |          |          |      |          |          |          |          |          |      |          |          |          |          |          |
| 10 O                                                                                                            | 4.345393                                                                                                                                                                                                                                                                                                                                                                                                                                                                                                                                                                                                                                                                                                                                                                                                                                                                                                                                                                                                                                                                                                                                                                                                                                                                                                                                                                                                                                                                                                                                                                                                                                                                                                                                                                                                                                                                                                                                                                                                                                                                                                                                                                                                                                                                                                                                                                                                                                                                                                                                                                                                                                                                                                                                                                                                                                                                                                                                                                                                                                                                                                                                                                                                                                                                                                                                                                                                                                                                                                                                                                                                                                                                                                                                                | 3.518530 | 4.288502 | 1.137665 | 0.000000 |   |   |      |          |  |  |  |  |      |          |          |  |  |  |     |          |          |          |  |  |     |          |          |          |          |  |     |          |          |          |          |          |     |          |          |          |          |          |     |          |          |          |          |          |     |          |          |          |          |          |     |          |          |          |          |          |      |          |          |          |          |          |      |          |          |          |          |          |      |          |          |          |          |          |      |          |          |          |          |          |      |          |          |          |          |          |      |          |          |          |          |          |      |          |          |          |          |          |      |          |          |          |          |          |      |          |          |          |          |          |      |          |          |          |          |          |      |          |          |          |          |          |      |          |          |          |          |          |      |          |          |          |          |          |      |          |          |          |          |          |      |          |          |          |          |          |      |          |          |          |          |          |      |          |          |          |          |          |  |   |   |   |   |    |     |          |  |  |  |  |     |          |          |  |  |  |     |          |          |          |  |  |     |          |          |          |          |  |      |          |          |          |          |          |      |          |          |          |          |          |      |          |          |          |          |          |
| 11 H                                                                                                            | 7.607614                                                                                                                                                                                                                                                                                                                                                                                                                                                                                                                                                                                                                                                                                                                                                                                                                                                                                                                                                                                                                                                                                                                                                                                                                                                                                                                                                                                                                                                                                                                                                                                                                                                                                                                                                                                                                                                                                                                                                                                                                                                                                                                                                                                                                                                                                                                                                                                                                                                                                                                                                                                                                                                                                                                                                                                                                                                                                                                                                                                                                                                                                                                                                                                                                                                                                                                                                                                                                                                                                                                                                                                                                                                                                                                                                | 7.070174 | 8.006155 | 6.567752 | 7.262376 |   |   |      |          |  |  |  |  |      |          |          |  |  |  |     |          |          |          |  |  |     |          |          |          |          |  |     |          |          |          |          |          |     |          |          |          |          |          |     |          |          |          |          |          |     |          |          |          |          |          |     |          |          |          |          |          |      |          |          |          |          |          |      |          |          |          |          |          |      |          |          |          |          |          |      |          |          |          |          |          |      |          |          |          |          |          |      |          |          |          |          |          |      |          |          |          |          |          |      |          |          |          |          |          |      |          |          |          |          |          |      |          |          |          |          |          |      |          |          |          |          |          |      |          |          |          |          |          |      |          |          |          |          |          |      |          |          |          |          |          |      |          |          |          |          |          |      |          |          |          |          |          |      |          |          |          |          |          |  |   |   |   |   |    |     |          |  |  |  |  |     |          |          |  |  |  |     |          |          |          |  |  |     |          |          |          |          |  |      |          |          |          |          |          |      |          |          |          |          |          |      |          |          |          |          |          |
| 12 C                                                                                                            | 7.448935                                                                                                                                                                                                                                                                                                                                                                                                                                                                                                                                                                                                                                                                                                                                                                                                                                                                                                                                                                                                                                                                                                                                                                                                                                                                                                                                                                                                                                                                                                                                                                                                                                                                                                                                                                                                                                                                                                                                                                                                                                                                                                                                                                                                                                                                                                                                                                                                                                                                                                                                                                                                                                                                                                                                                                                                                                                                                                                                                                                                                                                                                                                                                                                                                                                                                                                                                                                                                                                                                                                                                                                                                                                                                                                                                | 6.425671 | 7.287248 | 6.141230 | 6.868917 |   |   |      |          |  |  |  |  |      |          |          |  |  |  |     |          |          |          |  |  |     |          |          |          |          |  |     |          |          |          |          |          |     |          |          |          |          |          |     |          |          |          |          |          |     |          |          |          |          |          |     |          |          |          |          |          |      |          |          |          |          |          |      |          |          |          |          |          |      |          |          |          |          |          |      |          |          |          |          |          |      |          |          |          |          |          |      |          |          |          |          |          |      |          |          |          |          |          |      |          |          |          |          |          |      |          |          |          |          |          |      |          |          |          |          |          |      |          |          |          |          |          |      |          |          |          |          |          |      |          |          |          |          |          |      |          |          |          |          |          |      |          |          |          |          |          |      |          |          |          |          |          |      |          |          |          |          |          |  |   |   |   |   |    |     |          |  |  |  |  |     |          |          |  |  |  |     |          |          |          |  |  |     |          |          |          |          |  |      |          |          |          |          |          |      |          |          |          |          |          |      |          |          |          |          |          |

|  |    |   |          |          |          |          |          |
|--|----|---|----------|----------|----------|----------|----------|
|  | 13 | C | 7.449032 | 6.137386 | 6.863214 | 6.425584 | 7.288069 |
|  | 14 | H | 7.803593 | 6.464232 | 7.330540 | 5.523307 | 5.918780 |
|  | 15 | H | 7.607659 | 6.561107 | 7.252771 | 7.069670 | 8.006822 |
|  | 16 | C | 7.497184 | 5.503450 | 6.081611 | 6.019905 | 6.845529 |
|  | 17 | H | 7.805393 | 5.519133 | 5.912843 | 6.459245 | 7.324160 |
|  | 18 | C | 7.620657 | 5.525745 | 6.168991 | 5.524000 | 6.166611 |
|  | 19 | H | 7.949340 | 5.478347 | 6.002021 | 5.474700 | 5.996543 |
|  | 20 | C | 7.496459 | 6.022831 | 6.848977 | 5.506132 | 6.085406 |
|  | 21 | S | 4.051785 | 3.064309 | 3.849618 | 4.148863 | 5.272474 |
|  | 22 | S | 4.051919 | 4.148908 | 5.272417 | 3.064704 | 3.850945 |
|  | 23 | C | 3.661824 | 4.294615 | 5.214828 | 4.676876 | 5.734895 |
|  | 24 | C | 3.661833 | 4.676688 | 5.734193 | 4.294911 | 5.215955 |
|  | 25 | H | 4.016294 | 5.635192 | 6.698001 | 5.015660 | 5.824636 |
|  | 26 | H | 4.016272 | 5.015283 | 5.823233 | 5.635364 | 6.698656 |
|  |    |   | 11       | 12       | 13       | 14       | 15       |
|  | 11 | H | 0.000000 |          |          |          |          |
|  | 12 | C | 1.080617 | 0.000000 |          |          |          |
|  | 13 | C | 2.208379 | 1.391430 | 0.000000 |          |          |
|  | 14 | H | 2.712817 | 2.260148 | 3.342528 | 0.000000 |          |
|  | 15 | H | 2.665628 | 2.208315 | 1.080644 | 4.356280 | 0.000000 |
|  | 16 | C | 3.351000 | 2.304276 | 1.450703 | 3.347297 | 2.255912 |
|  | 17 | H | 4.356505 | 3.342799 | 2.260127 | 4.358953 | 2.712609 |
|  | 18 | C | 3.363703 | 2.322461 | 2.322250 | 2.238631 | 3.363485 |
|  | 19 | H | 4.376545 | 3.368709 | 3.368497 | 2.698641 | 4.376308 |
|  | 20 | C | 2.256107 | 1.450761 | 2.303939 | 1.079959 | 3.350697 |
|  | 21 | S | 4.790149 | 4.285670 | 3.763186 | 5.320581 | 3.858500 |
|  | 22 | S | 3.863283 | 3.765905 | 4.289007 | 3.887139 | 4.795414 |
|  | 23 | C | 4.552382 | 4.460458 | 4.250952 | 5.694582 | 4.150450 |
|  | 24 | C | 4.148527 | 4.249988 | 4.463870 | 5.161924 | 4.558421 |
|  | 25 | H | 4.481709 | 4.818870 | 5.177060 | 5.732448 | 5.190677 |
|  | 26 | H | 5.182081 | 5.172296 | 4.819537 | 6.633192 | 4.483271 |
|  |    |   | 16       | 17       | 18       | 19       | 20       |
|  | 16 | C | 0.000000 |          |          |          |          |
|  | 17 | H | 1.079946 | 0.000000 |          |          |          |
|  | 18 | C | 1.426363 | 2.238735 | 0.000000 |          |          |
|  | 19 | H | 2.239664 | 2.698705 | 1.080285 | 0.000000 |          |
|  | 20 | C | 2.302873 | 3.347301 | 1.426310 | 2.239679 | 0.000000 |
|  | 21 | S | 3.720811 | 3.891864 | 4.322366 | 4.867034 | 4.560690 |
|  | 22 | S | 4.561440 | 5.321842 | 4.319700 | 4.862277 | 3.718670 |
|  | 23 | C | 4.757523 | 5.169398 | 5.300529 | 6.030607 | 5.064607 |
|  | 24 | C | 5.068034 | 5.700522 | 5.299609 | 6.028952 | 4.753526 |
|  | 25 | H | 5.952386 | 6.639967 | 6.153965 | 6.926251 | 5.431471 |
|  | 26 | H | 5.436390 | 5.741868 | 6.155481 | 6.929012 | 5.948413 |
|  |    |   | 21       | 22       | 23       | 24       | 25       |
|  | 21 | S | 0.000000 |          |          |          |          |
|  | 22 | S | 3.025301 | 0.000000 |          |          |          |
|  | 23 | C | 1.798632 | 2.691729 | 0.000000 |          |          |
|  | 24 | C | 2.691708 | 1.798656 | 1.325564 | 0.000000 |          |
|  | 25 | H | 3.731902 | 2.490611 | 2.135585 | 1.084593 | 0.000000 |
|  | 26 | H | 2.490560 | 3.731933 | 1.084592 | 2.135605 | 2.553197 |

|                                                                                                                |                                                   |
|----------------------------------------------------------------------------------------------------------------|---------------------------------------------------|
|                                                                                                                | 26                                                |
|                                                                                                                | 26 H 0.000000                                     |
| 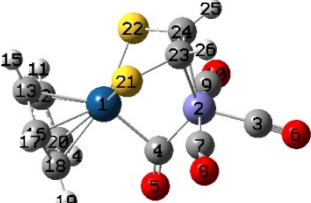 <p>5. -2887.479272 +31.5</p> | 1 2 3 4 5                                         |
|                                                                                                                | 1 Ir 0.000000                                     |
|                                                                                                                | 2 Fe 2.754208 0.000000                            |
|                                                                                                                | 3 C 4.471584 1.747708 0.000000                    |
|                                                                                                                | 4 C 2.150905 1.827875 3.017259 0.000000           |
|                                                                                                                | 5 O 3.010882 2.867529 3.646227 1.170078 0.000000  |
|                                                                                                                | 6 O 5.601086 2.890820 1.143400 4.008481 4.441995  |
|                                                                                                                | 7 C 3.410812 1.826475 2.403386 2.522880 3.281714  |
|                                                                                                                | 8 O 4.254855 2.955205 3.212133 3.396400 3.926992  |
|                                                                                                                | 9 C 3.410134 1.826390 2.403561 2.522404 3.281278  |
|                                                                                                                | 10 O 4.253741 2.955146 3.212562 3.395670 3.926222 |
|                                                                                                                | 11 H 2.946069 5.211035 6.795098 4.394368 4.809862 |
|                                                                                                                | 12 C 2.229808 4.774402 6.415252 3.786480 4.178153 |
|                                                                                                                | 13 C 2.243953 4.984337 6.713097 4.214498 4.756584 |
|                                                                                                                | 14 H 2.967136 4.644839 5.928301 3.070478 2.820746 |
|                                                                                                                | 15 H 2.964498 5.566822 7.314528 5.072565 5.729778 |
|                                                                                                                | 16 C 2.229782 4.774755 6.415735 3.786634 4.178212 |
|                                                                                                                | 17 H 2.946073 5.211707 6.796025 4.394667 4.809999 |
|                                                                                                                | 18 C 2.236451 4.444953 5.933821 3.009664 3.064111 |
|                                                                                                                | 19 H 2.967093 4.645225 5.928870 3.070650 2.820788 |
|                                                                                                                | 20 C 2.236468 4.444713 5.933489 3.009535 3.064047 |
|                                                                                                                | 21 S 2.399984 3.049376 4.535187 3.563772 4.592332 |
|                                                                                                                | 22 S 2.399645 3.049390 4.535254 3.564033 4.592742 |
|                                                                                                                | 23 C 3.104140 2.275832 3.448478 3.632123 4.782412 |
|                                                                                                                | 24 C 3.103974 2.275687 3.448362 3.632094 4.782436 |
|                                                                                                                | 25 H 4.138497 2.877777 3.563186 4.419477 5.522405 |
| 26 H 4.138722 2.878040 3.563466 4.419559 5.522407                                                              |                                                   |
|                                                                                                                | 6 7 8 9 10                                        |
| 6 O 0.000000                                                                                                   |                                                   |
| 7 C 3.265687 0.000000                                                                                          |                                                   |
| 8 O 3.825470 1.135452 0.000000                                                                                 |                                                   |
| 9 C 3.266101 3.618721 4.722161 0.000000                                                                        |                                                   |
| 10 O 3.826328 4.722202 5.805848 1.135458 0.000000                                                              |                                                   |
| 11 H 7.863472 6.288923 7.176332 4.874549 5.115056                                                              |                                                   |
| 12 C 7.507839 5.595129 6.388486 4.791740 5.236500                                                              |                                                   |
| 13 C 7.844664 5.441500 6.091257 5.440362 6.089318                                                              |                                                   |
| 14 H 6.863555 5.451013 6.192609 4.461863 4.755359                                                              |                                                   |
| 15 H 8.457547 6.024027 6.664616 6.023016 6.662861                                                              |                                                   |
| 16 C 7.508326 4.793326 5.239023 5.594365 6.387000                                                              |                                                   |
| 17 H 7.864414 4.876489 5.118048 6.288520 7.175272                                                              |                                                   |
| 18 C 6.960584 4.563512 5.043961 5.101696 5.812362                                                              |                                                   |
| 19 H 6.864133 4.463477 4.757969 5.450336 6.191243                                                              |                                                   |
| 20 C 6.960251 5.102578 5.813993 4.562063 5.041612                                                              |                                                   |
| 21 S 5.596044 2.846908 3.403911 4.427745 5.480521                                                              |                                                   |
| 22 S 5.596223 4.427655 5.480479 2.847283 3.404219                                                              |                                                   |
| 23 C 4.439812 2.658912 3.489069 3.469798 4.488554                                                              |                                                   |
| 24 C 4.439762 3.469221 4.487846 2.659478 3.489827                                                              |                                                   |
| 25 H 4.365589 4.138296 5.133395 2.863689 3.468985                                                              |                                                   |

|  |      |          |          |          |          |          |
|--|------|----------|----------|----------|----------|----------|
|  | 26 H | 4.365763 | 2.862989 | 3.467828 | 4.139083 | 5.134444 |
|  |      | 11       | 12       | 13       | 14       | 15       |
|  | 11 H | 0.000000 |          |          |          |          |
|  | 12 C | 1.080836 | 0.000000 |          |          |          |
|  | 13 C | 2.241374 | 1.432093 | 0.000000 |          |          |
|  | 14 H | 2.688764 | 2.236266 | 3.363036 | 0.000000 |          |
|  | 15 H | 2.703838 | 2.247922 | 1.079104 | 4.372490 | 0.000000 |
|  | 16 C | 3.347805 | 2.302699 | 1.432102 | 3.351636 | 2.247826 |
|  | 17 H | 4.359920 | 3.347801 | 2.241373 | 4.362366 | 2.703672 |
|  | 18 C | 3.353800 | 2.309327 | 2.319091 | 2.250375 | 3.361479 |
|  | 19 H | 4.362348 | 3.351628 | 3.363055 | 2.706599 | 4.372452 |
|  | 20 C | 2.228792 | 1.419844 | 2.319095 | 1.079451 | 3.361529 |
|  | 21 S | 4.969224 | 4.308113 | 3.599981 | 5.324302 | 3.756085 |
|  | 22 S | 3.291362 | 3.352193 | 3.598950 | 4.443674 | 3.754911 |
|  | 23 C | 5.521456 | 5.113393 | 4.793008 | 5.894542 | 4.948545 |
|  | 24 C | 4.949774 | 4.794159 | 4.792682 | 5.570411 | 4.948208 |
|  | 25 H | 5.734239 | 5.710551 | 5.802288 | 6.401987 | 5.907153 |
|  | 26 H | 6.606477 | 6.188501 | 5.802748 | 6.904192 | 5.907625 |
|  |      | 16       | 17       | 18       | 19       | 20       |
|  | 16 C | 0.000000 |          |          |          |          |
|  | 17 H | 1.080834 | 0.000000 |          |          |          |
|  | 18 C | 1.419824 | 2.228775 | 0.000000 |          |          |
|  | 19 H | 2.236297 | 2.688822 | 1.079455 | 0.000000 |          |
|  | 20 C | 2.309319 | 3.353793 | 1.440502 | 2.250327 | 0.000000 |
|  | 21 S | 3.352868 | 3.292034 | 3.983602 | 4.443684 | 4.521850 |
|  | 22 S | 4.307301 | 4.968387 | 4.521414 | 5.323997 | 3.983311 |
|  | 23 C | 4.794551 | 4.950323 | 5.131746 | 5.570656 | 5.320815 |
|  | 24 C | 5.113231 | 5.521432 | 5.320681 | 5.894479 | 5.131485 |
|  | 25 H | 6.188289 | 6.606455 | 6.349896 | 6.904109 | 6.063428 |
|  | 26 H | 5.711145 | 5.735073 | 6.063838 | 6.402409 | 6.350091 |
|  |      | 21       | 22       | 23       | 24       | 25       |
|  | 21 S | 0.000000 |          |          |          |          |
|  | 22 S | 3.177524 | 0.000000 |          |          |          |
|  | 23 C | 1.768137 | 2.736208 | 0.000000 |          |          |
|  | 24 C | 2.736261 | 1.768122 | 1.372357 | 0.000000 |          |
|  | 25 H | 3.731207 | 2.465855 | 2.137134 | 1.086638 | 0.000000 |
|  | 26 H | 2.465835 | 3.731144 | 1.086638 | 2.137158 | 2.467733 |
|  |      | 26       |          |          |          |          |
|  | 26 H | 0.000000 |          |          |          |          |

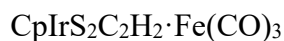

|                                                                                                             |          |          |          |          |          |          |
|-------------------------------------------------------------------------------------------------------------|----------|----------|----------|----------|----------|----------|
| 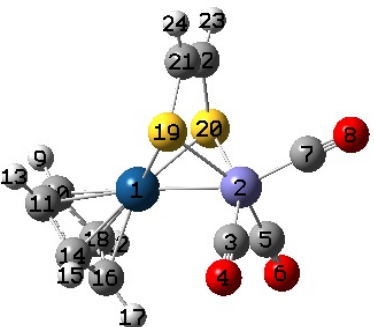 <p>1. -2774.29394 0.0</p> | 1        | 2        | 3        | 4        | 5        |          |
|                                                                                                             | 1 Ir     | 0.000000 |          |          |          |          |
|                                                                                                             | 2 Fe     | 2.503256 | 0.000000 |          |          |          |
|                                                                                                             | 3 C      | 3.193882 | 1.760122 | 0.000000 |          |          |
|                                                                                                             | 4 O      | 3.982922 | 2.901521 | 1.141855 | 0.000000 |          |
|                                                                                                             | 5 C      | 3.180939 | 1.759621 | 2.509556 | 3.425402 | 0.000000 |
|                                                                                                             | 6 O      | 3.965539 | 2.901226 | 3.424281 | 4.154307 | 1.142064 |
|                                                                                                             | 7 C      | 4.199557 | 1.784244 | 2.737695 | 3.704993 | 2.742416 |
|                                                                                                             | 8 O      | 5.319984 | 2.923421 | 3.680107 | 4.505616 | 3.685338 |
|                                                                                                             | 9 H      | 2.958271 | 5.329603 | 6.133439 | 6.819391 | 5.683255 |
|                                                                                                             | 10 C     | 2.210603 | 4.677100 | 5.265920 | 5.871733 | 4.984826 |
|                                                                                                             | 11 C     | 2.192264 | 4.592886 | 4.787173 | 5.199611 | 5.201999 |
|                                                                                                             | 12 H     | 2.921955 | 4.636615 | 5.337115 | 6.006231 | 4.118578 |
|                                                                                                             | 13 H     | 2.925531 | 5.181689 | 5.333194 | 5.688618 | 6.036909 |
|                                                                                                             | 14 C     | 2.180475 | 4.139767 | 3.902833 | 4.123471 | 4.528729 |
|                                                                                                             | 15 H     | 2.935093 | 4.443773 | 3.782199 | 3.713267 | 4.940272 |
|                                                                                                             | 16 C     | 2.196297 | 3.944296 | 3.926376 | 4.288065 | 3.778926 |
|                                                                                                             | 17 H     | 2.938160 | 4.062881 | 3.798917 | 4.025699 | 3.521679 |
|                                                                                                             | 18 C     | 2.179942 | 4.261351 | 4.777763 | 5.374444 | 4.081971 |
|                                                                                                             | 19 S     | 2.364971 | 2.337200 | 2.900441 | 3.674008 | 3.986995 |
|                                                                                                             | 20 S     | 2.365072 | 2.338813 | 3.993541 | 5.096341 | 2.905365 |
|                                                                                                             | 21 C     | 3.285638 | 3.165611 | 4.343992 | 5.271864 | 4.713832 |
|                                                                                                             | 22 C     | 3.285962 | 3.165372 | 4.711716 | 5.771322 | 4.349017 |
|                                                                                                             | 23 H     | 4.259096 | 4.115507 | 5.728149 | 6.806254 | 5.139082 |
|                                                                                                             | 24 H     | 4.258572 | 4.115618 | 5.131039 | 5.965447 | 5.730827 |
|                                                                                                             |          | 6        | 7        | 8        | 9        | 10       |
| 6 O                                                                                                         | 0.000000 |          |          |          |          |          |
| 7 C                                                                                                         | 3.711568 | 0.000000 |          |          |          |          |
| 8 O                                                                                                         | 4.513667 | 1.139579 | 0.000000 |          |          |          |
| 9 H                                                                                                         | 6.139738 | 6.888518 | 7.946765 | 0.000000 |          |          |
| 10 C                                                                                                        | 5.450058 | 6.351140 | 7.455883 | 1.079468 | 0.000000 |          |
| 11 C                                                                                                        | 5.821567 | 6.276261 | 7.384060 | 2.234270 | 1.419235 |          |
| 12 H                                                                                                        | 4.122252 | 6.246682 | 7.318563 | 2.710681 | 2.250008 |          |
| 13 H                                                                                                        | 6.752999 | 6.748769 | 7.809810 | 2.690299 | 2.230775 |          |
| 14 C                                                                                                        | 5.072488 | 5.880948 | 7.004886 | 3.365743 | 2.321342 |          |
| 15 H                                                                                                        | 5.522644 | 6.082599 | 7.163743 | 4.373479 | 3.362592 |          |
| 16 C                                                                                                        | 4.061529 | 5.717902 | 6.850337 | 3.367555 | 2.324963 |          |
| 17 H                                                                                                        | 3.582292 | 5.749542 | 6.843512 | 4.377405 | 3.368380 |          |
| 18 C                                                                                                        | 4.321129 | 5.982611 | 7.100469 | 2.253316 | 1.440214 |          |
| 19 S                                                                                                        | 5.088395 | 3.286369 | 4.203827 | 4.724061 | 4.213613 |          |
| 20 S                                                                                                        | 3.681103 | 3.280432 | 4.195003 | 4.019583 | 3.808135 |          |
| 21 C                                                                                                        | 5.774930 | 3.559433 | 4.234545 | 4.916321 | 4.776778 |          |
| 22 C                                                                                                        | 5.280133 | 3.555764 | 4.229315 | 4.631732 | 4.624431 |          |
| 23 H                                                                                                        | 5.978589 | 4.244439 | 4.725544 | 5.163754 | 5.341409 |          |
| 24 H                                                                                                        | 6.810771 | 4.250098 | 4.734311 | 5.652873 | 5.596372 |          |
|                                                                                                             | 11       | 12       | 13       | 14       | 15       |          |
| 11 C                                                                                                        | 0.000000 |          |          |          |          |          |
| 12 H                                                                                                        | 3.349016 | 0.000000 |          |          |          |          |

|                                                                                                                 |                                                   |
|-----------------------------------------------------------------------------------------------------------------|---------------------------------------------------|
|                                                                                                                 | 13 H 1.080195 4.361441 0.000000                   |
|                                                                                                                 | 14 C 1.440280 3.353676 2.247922 0.000000          |
|                                                                                                                 | 15 H 2.252075 4.365032 2.705458 1.079781 0.000000 |
|                                                                                                                 | 16 C 2.316714 2.237547 3.359211 1.429917 2.244013 |
|                                                                                                                 | 17 H 3.362437 2.692417 4.371944 2.243522 2.705412 |
|                                                                                                                 | 18 C 2.305900 1.080214 3.351351 2.310235 3.354683 |
|                                                                                                                 | 19 S 3.692196 5.259384 3.796642 3.747144 3.937610 |
|                                                                                                                 | 20 S 4.329183 3.759178 4.910229 4.528510 5.264636 |
|                                                                                                                 | 21 C 4.645751 5.784537 4.659075 5.091598 5.500870 |
|                                                                                                                 | 22 C 4.883864 5.241769 5.099795 5.365753 5.972352 |
|                                                                                                                 | 23 H 5.749465 5.869981 5.924770 6.343709 7.001867 |
|                                                                                                                 | 24 H 5.351710 6.790049 5.170439 5.887471 6.204589 |
|                                                                                                                 | 16 17 18 19 20                                    |
|                                                                                                                 | 16 C 0.000000                                     |
|                                                                                                                 | 17 H 1.080072 0.000000                            |
|                                                                                                                 | 18 C 1.427163 2.238699 0.000000                   |
|                                                                                                                 | 19 S 4.305217 4.876570 4.532947 0.000000          |
|                                                                                                                 | 20 S 4.168036 4.643456 3.659730 2.986832 0.000000 |
|                                                                                                                 | 21 C 5.472750 6.131508 5.263460 1.789491 2.674310 |
|                                                                                                                 | 22 C 5.425822 6.050949 4.953998 2.674110 1.789374 |
|                                                                                                                 | 23 H 6.341119 6.974989 5.711926 3.718217 2.477720 |
|                                                                                                                 | 24 H 6.419062 7.110473 6.227377 2.477797 3.718441 |
|                                                                                                                 | 21 22 23 24                                       |
|                                                                                                                 | 21 C 0.000000                                     |
|                                                                                                                 | 22 C 1.322248 0.000000                            |
|                                                                                                                 | 23 H 2.139442 1.083890 0.000000                   |
|                                                                                                                 | 24 H 1.083872 2.139639 2.573525 0.000000          |
|                                                                                                                 | 1 2 3 4 5                                         |
|                                                                                                                 | 1 Ir 0.000000                                     |
|                                                                                                                 | 2 Fe 2.736031 0.000000                            |
|                                                                                                                 | 3 C 2.199657 4.691050 0.000000                    |
|                                                                                                                 | 4 C 4.023858 1.741037 5.543106 0.000000           |
|                                                                                                                 | 5 C 2.016634 1.895204 3.506537 2.733592 0.000000  |
|                                                                                                                 | 6 O 2.933286 2.895793 3.896942 3.292434 1.177692  |
|                                                                                                                 | 7 O 5.018567 2.882045 6.303259 1.141008 3.648162  |
|                                                                                                                 | 8 C 4.022239 1.741025 6.032496 2.481763 2.732702  |
|                                                                                                                 | 9 O 5.016419 2.882034 7.007968 3.391269 3.647013  |
|                                                                                                                 | 10 H 3.198323 5.598637 2.260475 6.623871 5.074240 |
|                                                                                                                 | 11 C 2.454764 5.087613 1.457465 6.199436 4.304214 |
|                                                                                                                 | 12 C 2.454596 5.086557 2.300600 6.468518 4.303560 |
|                                                                                                                 | 13 H 2.937633 5.056926 1.080191 5.588576 3.879044 |
|                                                                                                                 | 14 H 3.198020 5.596718 3.348301 7.102014 5.073131 |
|                                                                                                                 | 15 C 2.199390 4.689170 2.295324 6.032736 3.505230 |
|                                                                                                                 | 16 H 2.937423 5.053862 3.339732 6.479134 3.877021 |
|                                                                                                                 | 17 C 2.165613 4.574953 1.426542 5.573999 3.055318 |
|                                                                                                                 | 18 H 2.828593 4.764486 2.242636 5.559225 2.985526 |
|                                                                                                                 | 19 S 2.383703 2.438253 4.511486 4.174219 3.008412 |
|                                                                                                                 | 20 S 2.383678 2.438409 3.584533 3.050259 3.006704 |
|                                                                                                                 | 21 C 3.288438 2.136392 5.350560 3.515493 3.632751 |
|                                                                                                                 | 22 C 3.288293 2.136468 5.048767 2.994137 3.632114 |
| 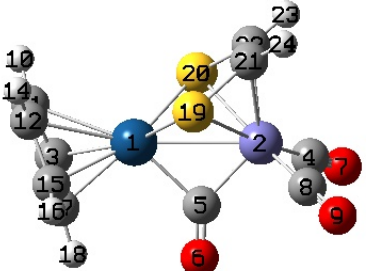 <p>2. -2774.281945 +7.5</p> |                                                   |

|  |      |          |          |          |          |          |
|--|------|----------|----------|----------|----------|----------|
|  | 23 H | 4.324633 | 2.883720 | 5.952237 | 3.230124 | 4.513143 |
|  | 24 H | 4.324821 | 2.883772 | 6.415601 | 4.078353 | 4.514183 |
|  |      | 6        | 7        | 8        | 9        | 10       |
|  | 6 O  | 0.000000 |          |          |          |          |
|  | 7 O  | 3.968092 | 0.000000 |          |          |          |
|  | 8 C  | 3.291903 | 3.391315 | 0.000000 |          |          |
|  | 9 O  | 3.967285 | 4.109562 | 1.141010 | 0.000000 |          |
|  | 10 H | 5.796069 | 7.441194 | 7.101614 | 8.138178 | 0.000000 |
|  | 11 C | 4.941114 | 7.067119 | 6.466981 | 7.453588 | 1.080934 |
|  | 12 C | 4.940632 | 7.456260 | 6.195039 | 7.061250 | 2.199584 |
|  | 13 H | 4.143099 | 6.183134 | 6.480699 | 7.487359 | 2.714981 |
|  | 14 H | 5.795254 | 8.139606 | 6.618274 | 7.433927 | 2.658258 |
|  | 15 C | 3.895949 | 7.009153 | 5.537691 | 6.296290 | 3.348374 |
|  | 16 H | 4.141519 | 7.486501 | 5.581230 | 6.173786 | 4.351732 |
|  | 17 C | 3.207366 | 6.403811 | 5.571374 | 6.400001 | 3.368864 |
|  | 18 H | 2.727116 | 6.291237 | 5.556891 | 6.287775 | 4.382109 |
|  | 19 S | 4.044717 | 5.313623 | 3.049530 | 3.844677 | 4.841222 |
|  | 20 S | 4.042251 | 3.845509 | 4.174495 | 5.313947 | 3.842515 |
|  | 21 C | 4.764984 | 4.555212 | 2.995312 | 3.891305 | 5.412765 |
|  | 22 C | 4.764080 | 3.889706 | 3.517005 | 4.557170 | 5.066659 |
|  | 23 H | 5.585378 | 3.885881 | 4.080466 | 5.039309 | 5.850105 |
|  | 24 H | 5.586908 | 5.036405 | 3.232243 | 3.888871 | 6.391061 |
|  |      | 11       | 12       | 13       | 14       | 15       |
|  | 11 C | 0.000000 |          |          |          |          |
|  | 12 C | 1.380486 | 0.000000 |          |          |          |
|  | 13 H | 2.263891 | 3.336408 | 0.000000 |          |          |
|  | 14 H | 2.199557 | 1.080936 | 4.351676 | 0.000000 |          |
|  | 15 C | 2.300665 | 1.457494 | 3.339731 | 2.260500 | 0.000000 |
|  | 16 H | 3.336451 | 2.263908 | 4.351016 | 2.715012 | 1.080192 |
|  | 17 C | 2.328717 | 2.328701 | 2.235973 | 3.368855 | 1.426557 |
|  | 18 H | 3.375282 | 3.375257 | 2.698677 | 4.382091 | 2.242610 |
|  | 19 S | 4.293160 | 3.729653 | 5.304675 | 3.838135 | 3.582854 |
|  | 20 S | 3.732786 | 4.295357 | 3.728751 | 4.843654 | 4.512038 |
|  | 21 C | 5.143463 | 4.956040 | 5.911123 | 5.064790 | 5.047916 |
|  | 22 C | 4.957169 | 5.143763 | 5.384164 | 5.412887 | 5.350149 |
|  | 23 H | 5.864920 | 6.151554 | 6.168776 | 6.391785 | 6.415313 |
|  | 24 H | 6.150804 | 5.863279 | 6.994504 | 5.847461 | 5.951191 |
|  |      | 16       | 17       | 18       | 19       | 20       |
|  | 16 H | 0.000000 |          |          |          |          |
|  | 17 C | 2.236000 | 0.000000 |          |          |          |
|  | 18 H | 2.698659 | 1.080393 | 0.000000 |          |          |
|  | 19 S | 3.727298 | 4.227636 | 4.773696 | 0.000000 |          |
|  | 20 S | 5.304769 | 4.227801 | 4.772877 | 3.273241 | 0.000000 |
|  | 21 C | 5.383151 | 5.422736 | 5.958277 | 1.764236 | 2.755279 |
|  | 22 C | 5.910379 | 5.422666 | 5.957903 | 2.755097 | 1.764216 |
|  | 23 H | 6.993783 | 6.424258 | 6.931586 | 3.759872 | 2.440920 |
|  | 24 H | 6.167581 | 6.424353 | 6.932197 | 2.441085 | 3.760009 |
|  |      | 21       | 22       | 23       | 24       |          |
|  | 21 C | 0.000000 |          |          |          |          |
|  | 22 C | 1.368237 | 0.000000 |          |          |          |

|                                                                                                                | 23 H 2.143428 1.084261 0.000000<br>24 H 1.084251 2.143457 2.498643 0.000000                                                                                                                                                                                                                                                                                                                                                                                                                                                                                                                                                                                                                                                                                                                                                                                                                                                                                                                                                                                                                                                                                                                                                                                                                                                                                                                                                                                                                                                                                                                                                                                                                                                                                                                                                                                                                                                                                                                                                                                                                                                                                                                                                                                                                                                                                                                                                                                                                                                                                                                                                                                                                                                                                                                                                                                                                                                                                                                                                                                                                                                                                                                                                                                                                                                                                                                                                                                                                                                                                                                                                                                                                                                                                                                                                                                                                                                                                                                                                                                                                                                                                                                                                                                                                                                                                                                                                                                                                                                                                                                                                                                                                                                                                                                                                                                                                                                                                                                                                                                                                                                      |          |          |          |          |   |   |      |          |  |  |  |  |      |          |          |  |  |  |     |          |          |          |  |  |     |          |          |          |          |  |     |          |          |          |          |          |     |          |          |          |          |          |     |          |          |          |          |          |     |          |          |          |          |          |     |          |          |          |          |          |      |          |          |          |          |          |      |          |          |          |          |          |      |          |          |          |          |          |      |          |          |          |          |          |      |          |          |          |          |          |      |          |          |          |          |          |      |          |          |          |          |          |      |          |          |          |          |          |      |          |          |          |          |          |      |          |          |          |          |          |      |          |          |          |          |          |      |          |          |          |          |          |      |          |          |          |          |          |      |          |          |          |          |          |      |          |          |          |          |          |  |   |   |   |   |    |     |          |  |  |  |  |     |          |          |  |  |  |     |          |          |          |  |  |     |          |          |          |          |  |      |          |          |          |          |          |      |          |          |          |          |          |      |          |          |          |          |          |      |          |          |          |          |          |      |          |          |          |          |          |      |          |          |          |          |          |      |          |          |          |          |          |      |          |          |          |          |          |      |          |          |          |          |          |      |          |          |          |          |          |      |          |          |          |          |          |      |          |          |          |          |          |      |          |          |          |          |          |      |          |          |          |          |          |      |          |          |          |          |          |  |    |    |    |    |    |      |          |  |  |  |  |      |          |          |  |  |  |
|----------------------------------------------------------------------------------------------------------------|----------------------------------------------------------------------------------------------------------------------------------------------------------------------------------------------------------------------------------------------------------------------------------------------------------------------------------------------------------------------------------------------------------------------------------------------------------------------------------------------------------------------------------------------------------------------------------------------------------------------------------------------------------------------------------------------------------------------------------------------------------------------------------------------------------------------------------------------------------------------------------------------------------------------------------------------------------------------------------------------------------------------------------------------------------------------------------------------------------------------------------------------------------------------------------------------------------------------------------------------------------------------------------------------------------------------------------------------------------------------------------------------------------------------------------------------------------------------------------------------------------------------------------------------------------------------------------------------------------------------------------------------------------------------------------------------------------------------------------------------------------------------------------------------------------------------------------------------------------------------------------------------------------------------------------------------------------------------------------------------------------------------------------------------------------------------------------------------------------------------------------------------------------------------------------------------------------------------------------------------------------------------------------------------------------------------------------------------------------------------------------------------------------------------------------------------------------------------------------------------------------------------------------------------------------------------------------------------------------------------------------------------------------------------------------------------------------------------------------------------------------------------------------------------------------------------------------------------------------------------------------------------------------------------------------------------------------------------------------------------------------------------------------------------------------------------------------------------------------------------------------------------------------------------------------------------------------------------------------------------------------------------------------------------------------------------------------------------------------------------------------------------------------------------------------------------------------------------------------------------------------------------------------------------------------------------------------------------------------------------------------------------------------------------------------------------------------------------------------------------------------------------------------------------------------------------------------------------------------------------------------------------------------------------------------------------------------------------------------------------------------------------------------------------------------------------------------------------------------------------------------------------------------------------------------------------------------------------------------------------------------------------------------------------------------------------------------------------------------------------------------------------------------------------------------------------------------------------------------------------------------------------------------------------------------------------------------------------------------------------------------------------------------------------------------------------------------------------------------------------------------------------------------------------------------------------------------------------------------------------------------------------------------------------------------------------------------------------------------------------------------------------------------------------------------------------------------------------------------------------------------|----------|----------|----------|----------|---|---|------|----------|--|--|--|--|------|----------|----------|--|--|--|-----|----------|----------|----------|--|--|-----|----------|----------|----------|----------|--|-----|----------|----------|----------|----------|----------|-----|----------|----------|----------|----------|----------|-----|----------|----------|----------|----------|----------|-----|----------|----------|----------|----------|----------|-----|----------|----------|----------|----------|----------|------|----------|----------|----------|----------|----------|------|----------|----------|----------|----------|----------|------|----------|----------|----------|----------|----------|------|----------|----------|----------|----------|----------|------|----------|----------|----------|----------|----------|------|----------|----------|----------|----------|----------|------|----------|----------|----------|----------|----------|------|----------|----------|----------|----------|----------|------|----------|----------|----------|----------|----------|------|----------|----------|----------|----------|----------|------|----------|----------|----------|----------|----------|------|----------|----------|----------|----------|----------|------|----------|----------|----------|----------|----------|------|----------|----------|----------|----------|----------|------|----------|----------|----------|----------|----------|--|---|---|---|---|----|-----|----------|--|--|--|--|-----|----------|----------|--|--|--|-----|----------|----------|----------|--|--|-----|----------|----------|----------|----------|--|------|----------|----------|----------|----------|----------|------|----------|----------|----------|----------|----------|------|----------|----------|----------|----------|----------|------|----------|----------|----------|----------|----------|------|----------|----------|----------|----------|----------|------|----------|----------|----------|----------|----------|------|----------|----------|----------|----------|----------|------|----------|----------|----------|----------|----------|------|----------|----------|----------|----------|----------|------|----------|----------|----------|----------|----------|------|----------|----------|----------|----------|----------|------|----------|----------|----------|----------|----------|------|----------|----------|----------|----------|----------|------|----------|----------|----------|----------|----------|------|----------|----------|----------|----------|----------|--|----|----|----|----|----|------|----------|--|--|--|--|------|----------|----------|--|--|--|
| 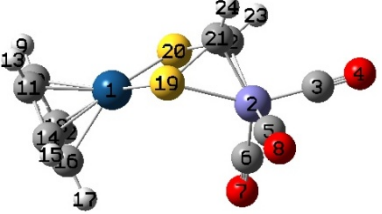 <p>3. -2774.270437 +14.7</p> | <table border="1"> <thead> <tr> <th></th> <th>1</th> <th>2</th> <th>3</th> <th>4</th> <th>5</th> </tr> </thead> <tbody> <tr><td>1 Ir</td><td>0.000000</td><td></td><td></td><td></td><td></td></tr> <tr><td>2 Fe</td><td>3.779215</td><td>0.000000</td><td></td><td></td><td></td></tr> <tr><td>3 C</td><td>5.313545</td><td>1.745225</td><td>0.000000</td><td></td><td></td></tr> <tr><td>4 O</td><td>6.360550</td><td>2.888602</td><td>1.144157</td><td>0.000000</td><td></td></tr> <tr><td>5 C</td><td>4.957910</td><td>1.783929</td><td>2.534839</td><td>3.467042</td><td>0.000000</td></tr> <tr><td>6 C</td><td>3.859109</td><td>1.787914</td><td>2.685150</td><td>3.631437</td><td>2.851373</td></tr> <tr><td>7 O</td><td>4.275373</td><td>2.929938</td><td>3.648335</td><td>4.447306</td><td>3.844122</td></tr> <tr><td>8 O</td><td>5.866552</td><td>2.926428</td><td>3.461751</td><td>4.219112</td><td>1.142614</td></tr> <tr><td>9 H</td><td>2.904638</td><td>6.559161</td><td>7.916223</td><td>8.852209</td><td>7.827855</td></tr> <tr><td>10 C</td><td>2.174057</td><td>5.946135</td><td>7.425898</td><td>8.429119</td><td>7.098432</td></tr> <tr><td>11 C</td><td>2.188868</td><td>5.740758</td><td>7.363008</td><td>8.436766</td><td>6.580728</td></tr> <tr><td>12 H</td><td>2.921498</td><td>6.002531</td><td>7.301995</td><td>8.224085</td><td>7.316679</td></tr> <tr><td>13 H</td><td>2.929963</td><td>6.212477</td><td>7.811228</td><td>8.871811</td><td>6.934118</td></tr> <tr><td>14 C</td><td>2.221670</td><td>5.290713</td><td>6.997412</td><td>8.117064</td><td>5.925761</td></tr> <tr><td>15 H</td><td>2.949402</td><td>5.359480</td><td>7.103625</td><td>8.245181</td><td>5.661532</td></tr> <tr><td>16 C</td><td>2.170347</td><td>5.157370</td><td>6.762608</td><td>7.838854</td><td>6.023920</td></tr> <tr><td>17 H</td><td>2.903874</td><td>5.151491</td><td>6.704289</td><td>7.764052</td><td>5.894089</td></tr> <tr><td>18 C</td><td>2.184181</td><td>5.627221</td><td>7.085595</td><td>8.085836</td><td>6.805166</td></tr> <tr><td>19 S</td><td>2.334536</td><td>2.358861</td><td>3.980543</td><td>5.079919</td><td>3.007828</td></tr> <tr><td>20 S</td><td>2.205855</td><td>3.308083</td><td>4.241649</td><td>5.059153</td><td>4.990893</td></tr> <tr><td>21 C</td><td>3.321914</td><td>1.926126</td><td>2.907739</td><td>3.835499</td><td>3.012876</td></tr> <tr><td>22 C</td><td>3.201101</td><td>2.038794</td><td>2.691182</td><td>3.513578</td><td>3.688885</td></tr> <tr><td>23 H</td><td>4.174394</td><td>2.737515</td><td>2.696995</td><td>3.186475</td><td>4.316813</td></tr> <tr><td>24 H</td><td>4.204185</td><td>2.739210</td><td>3.335115</td><td>4.077252</td><td>3.405291</td></tr> <tr> <th></th> <th>6</th> <th>7</th> <th>8</th> <th>9</th> <th>10</th> </tr> <tr><td>6 C</td><td>0.000000</td><td></td><td></td><td></td><td></td></tr> <tr><td>7 O</td><td>1.142727</td><td>0.000000</td><td></td><td></td><td></td></tr> <tr><td>8 O</td><td>3.830834</td><td>4.706798</td><td>0.000000</td><td></td><td></td></tr> <tr><td>9 H</td><td>6.557542</td><td>6.759213</td><td>8.725432</td><td>0.000000</td><td></td></tr> <tr><td>10 C</td><td>5.848624</td><td>6.021726</td><td>7.949830</td><td>1.080115</td><td>0.000000</td></tr> <tr><td>11 C</td><td>5.871663</td><td>6.188919</td><td>7.286627</td><td>2.252691</td><td>1.445780</td></tr> <tr><td>12 H</td><td>5.272447</td><td>5.038084</td><td>8.246747</td><td>2.698017</td><td>2.235990</td></tr> <tr><td>13 H</td><td>6.599373</td><td>7.038484</td><td>7.568317</td><td>2.707139</td><td>2.255110</td></tr> <tr><td>14 C</td><td>5.174331</td><td>5.381916</td><td>6.547732</td><td>3.357138</td><td>2.316150</td></tr> <tr><td>15 H</td><td>5.344638</td><td>5.612925</td><td>6.113503</td><td>4.368954</td><td>3.361591</td></tr> <tr><td>16 C</td><td>4.600299</td><td>4.546381</td><td>6.762919</td><td>3.353816</td><td>2.306932</td></tr> <tr><td>17 H</td><td>4.283454</td><td>4.021629</td><td>6.578216</td><td>4.364149</td><td>3.349748</td></tr> <tr><td>18 C</td><td>5.118777</td><td>5.057288</td><td>7.676317</td><td>2.232505</td><td>1.417954</td></tr> <tr><td>19 S</td><td>3.353103</td><td>4.249149</td><td>3.811533</td><td>5.006211</td><td>4.338093</td></tr> <tr><td>20 S</td><td>3.490796</td><td>3.999965</td><td>6.094664</td><td>3.888825</td><td>3.673230</td></tr> <tr><td>21 C</td><td>3.457361</td><td>4.519859</td><td>3.973856</td><td>5.716167</td><td>5.308616</td></tr> <tr><td>22 C</td><td>3.014262</td><td>3.924737</td><td>4.792846</td><td>5.419242</td><td>5.108480</td></tr> <tr><td>23 H</td><td>3.676222</td><td>4.531570</td><td>5.394308</td><td>6.095971</td><td>5.926312</td></tr> <tr><td>24 H</td><td>4.423837</td><td>5.522957</td><td>4.180275</td><td>6.370706</td><td>6.049992</td></tr> <tr> <th></th> <th>11</th> <th>12</th> <th>13</th> <th>14</th> <th>15</th> </tr> <tr><td>11 C</td><td>0.000000</td><td></td><td></td><td></td><td></td></tr> <tr><td>12 H</td><td>3.367339</td><td>0.000000</td><td></td><td></td><td></td></tr> </tbody> </table> |          | 1        | 2        | 3        | 4 | 5 | 1 Ir | 0.000000 |  |  |  |  | 2 Fe | 3.779215 | 0.000000 |  |  |  | 3 C | 5.313545 | 1.745225 | 0.000000 |  |  | 4 O | 6.360550 | 2.888602 | 1.144157 | 0.000000 |  | 5 C | 4.957910 | 1.783929 | 2.534839 | 3.467042 | 0.000000 | 6 C | 3.859109 | 1.787914 | 2.685150 | 3.631437 | 2.851373 | 7 O | 4.275373 | 2.929938 | 3.648335 | 4.447306 | 3.844122 | 8 O | 5.866552 | 2.926428 | 3.461751 | 4.219112 | 1.142614 | 9 H | 2.904638 | 6.559161 | 7.916223 | 8.852209 | 7.827855 | 10 C | 2.174057 | 5.946135 | 7.425898 | 8.429119 | 7.098432 | 11 C | 2.188868 | 5.740758 | 7.363008 | 8.436766 | 6.580728 | 12 H | 2.921498 | 6.002531 | 7.301995 | 8.224085 | 7.316679 | 13 H | 2.929963 | 6.212477 | 7.811228 | 8.871811 | 6.934118 | 14 C | 2.221670 | 5.290713 | 6.997412 | 8.117064 | 5.925761 | 15 H | 2.949402 | 5.359480 | 7.103625 | 8.245181 | 5.661532 | 16 C | 2.170347 | 5.157370 | 6.762608 | 7.838854 | 6.023920 | 17 H | 2.903874 | 5.151491 | 6.704289 | 7.764052 | 5.894089 | 18 C | 2.184181 | 5.627221 | 7.085595 | 8.085836 | 6.805166 | 19 S | 2.334536 | 2.358861 | 3.980543 | 5.079919 | 3.007828 | 20 S | 2.205855 | 3.308083 | 4.241649 | 5.059153 | 4.990893 | 21 C | 3.321914 | 1.926126 | 2.907739 | 3.835499 | 3.012876 | 22 C | 3.201101 | 2.038794 | 2.691182 | 3.513578 | 3.688885 | 23 H | 4.174394 | 2.737515 | 2.696995 | 3.186475 | 4.316813 | 24 H | 4.204185 | 2.739210 | 3.335115 | 4.077252 | 3.405291 |  | 6 | 7 | 8 | 9 | 10 | 6 C | 0.000000 |  |  |  |  | 7 O | 1.142727 | 0.000000 |  |  |  | 8 O | 3.830834 | 4.706798 | 0.000000 |  |  | 9 H | 6.557542 | 6.759213 | 8.725432 | 0.000000 |  | 10 C | 5.848624 | 6.021726 | 7.949830 | 1.080115 | 0.000000 | 11 C | 5.871663 | 6.188919 | 7.286627 | 2.252691 | 1.445780 | 12 H | 5.272447 | 5.038084 | 8.246747 | 2.698017 | 2.235990 | 13 H | 6.599373 | 7.038484 | 7.568317 | 2.707139 | 2.255110 | 14 C | 5.174331 | 5.381916 | 6.547732 | 3.357138 | 2.316150 | 15 H | 5.344638 | 5.612925 | 6.113503 | 4.368954 | 3.361591 | 16 C | 4.600299 | 4.546381 | 6.762919 | 3.353816 | 2.306932 | 17 H | 4.283454 | 4.021629 | 6.578216 | 4.364149 | 3.349748 | 18 C | 5.118777 | 5.057288 | 7.676317 | 2.232505 | 1.417954 | 19 S | 3.353103 | 4.249149 | 3.811533 | 5.006211 | 4.338093 | 20 S | 3.490796 | 3.999965 | 6.094664 | 3.888825 | 3.673230 | 21 C | 3.457361 | 4.519859 | 3.973856 | 5.716167 | 5.308616 | 22 C | 3.014262 | 3.924737 | 4.792846 | 5.419242 | 5.108480 | 23 H | 3.676222 | 4.531570 | 5.394308 | 6.095971 | 5.926312 | 24 H | 4.423837 | 5.522957 | 4.180275 | 6.370706 | 6.049992 |  | 11 | 12 | 13 | 14 | 15 | 11 C | 0.000000 |  |  |  |  | 12 H | 3.367339 | 0.000000 |  |  |  |
|                                                                                                                | 1                                                                                                                                                                                                                                                                                                                                                                                                                                                                                                                                                                                                                                                                                                                                                                                                                                                                                                                                                                                                                                                                                                                                                                                                                                                                                                                                                                                                                                                                                                                                                                                                                                                                                                                                                                                                                                                                                                                                                                                                                                                                                                                                                                                                                                                                                                                                                                                                                                                                                                                                                                                                                                                                                                                                                                                                                                                                                                                                                                                                                                                                                                                                                                                                                                                                                                                                                                                                                                                                                                                                                                                                                                                                                                                                                                                                                                                                                                                                                                                                                                                                                                                                                                                                                                                                                                                                                                                                                                                                                                                                                                                                                                                                                                                                                                                                                                                                                                                                                                                                                                                                                                                                | 2        | 3        | 4        | 5        |   |   |      |          |  |  |  |  |      |          |          |  |  |  |     |          |          |          |  |  |     |          |          |          |          |  |     |          |          |          |          |          |     |          |          |          |          |          |     |          |          |          |          |          |     |          |          |          |          |          |     |          |          |          |          |          |      |          |          |          |          |          |      |          |          |          |          |          |      |          |          |          |          |          |      |          |          |          |          |          |      |          |          |          |          |          |      |          |          |          |          |          |      |          |          |          |          |          |      |          |          |          |          |          |      |          |          |          |          |          |      |          |          |          |          |          |      |          |          |          |          |          |      |          |          |          |          |          |      |          |          |          |          |          |      |          |          |          |          |          |      |          |          |          |          |          |  |   |   |   |   |    |     |          |  |  |  |  |     |          |          |  |  |  |     |          |          |          |  |  |     |          |          |          |          |  |      |          |          |          |          |          |      |          |          |          |          |          |      |          |          |          |          |          |      |          |          |          |          |          |      |          |          |          |          |          |      |          |          |          |          |          |      |          |          |          |          |          |      |          |          |          |          |          |      |          |          |          |          |          |      |          |          |          |          |          |      |          |          |          |          |          |      |          |          |          |          |          |      |          |          |          |          |          |      |          |          |          |          |          |      |          |          |          |          |          |  |    |    |    |    |    |      |          |  |  |  |  |      |          |          |  |  |  |
| 1 Ir                                                                                                           | 0.000000                                                                                                                                                                                                                                                                                                                                                                                                                                                                                                                                                                                                                                                                                                                                                                                                                                                                                                                                                                                                                                                                                                                                                                                                                                                                                                                                                                                                                                                                                                                                                                                                                                                                                                                                                                                                                                                                                                                                                                                                                                                                                                                                                                                                                                                                                                                                                                                                                                                                                                                                                                                                                                                                                                                                                                                                                                                                                                                                                                                                                                                                                                                                                                                                                                                                                                                                                                                                                                                                                                                                                                                                                                                                                                                                                                                                                                                                                                                                                                                                                                                                                                                                                                                                                                                                                                                                                                                                                                                                                                                                                                                                                                                                                                                                                                                                                                                                                                                                                                                                                                                                                                                         |          |          |          |          |   |   |      |          |  |  |  |  |      |          |          |  |  |  |     |          |          |          |  |  |     |          |          |          |          |  |     |          |          |          |          |          |     |          |          |          |          |          |     |          |          |          |          |          |     |          |          |          |          |          |     |          |          |          |          |          |      |          |          |          |          |          |      |          |          |          |          |          |      |          |          |          |          |          |      |          |          |          |          |          |      |          |          |          |          |          |      |          |          |          |          |          |      |          |          |          |          |          |      |          |          |          |          |          |      |          |          |          |          |          |      |          |          |          |          |          |      |          |          |          |          |          |      |          |          |          |          |          |      |          |          |          |          |          |      |          |          |          |          |          |      |          |          |          |          |          |  |   |   |   |   |    |     |          |  |  |  |  |     |          |          |  |  |  |     |          |          |          |  |  |     |          |          |          |          |  |      |          |          |          |          |          |      |          |          |          |          |          |      |          |          |          |          |          |      |          |          |          |          |          |      |          |          |          |          |          |      |          |          |          |          |          |      |          |          |          |          |          |      |          |          |          |          |          |      |          |          |          |          |          |      |          |          |          |          |          |      |          |          |          |          |          |      |          |          |          |          |          |      |          |          |          |          |          |      |          |          |          |          |          |      |          |          |          |          |          |  |    |    |    |    |    |      |          |  |  |  |  |      |          |          |  |  |  |
| 2 Fe                                                                                                           | 3.779215                                                                                                                                                                                                                                                                                                                                                                                                                                                                                                                                                                                                                                                                                                                                                                                                                                                                                                                                                                                                                                                                                                                                                                                                                                                                                                                                                                                                                                                                                                                                                                                                                                                                                                                                                                                                                                                                                                                                                                                                                                                                                                                                                                                                                                                                                                                                                                                                                                                                                                                                                                                                                                                                                                                                                                                                                                                                                                                                                                                                                                                                                                                                                                                                                                                                                                                                                                                                                                                                                                                                                                                                                                                                                                                                                                                                                                                                                                                                                                                                                                                                                                                                                                                                                                                                                                                                                                                                                                                                                                                                                                                                                                                                                                                                                                                                                                                                                                                                                                                                                                                                                                                         | 0.000000 |          |          |          |   |   |      |          |  |  |  |  |      |          |          |  |  |  |     |          |          |          |  |  |     |          |          |          |          |  |     |          |          |          |          |          |     |          |          |          |          |          |     |          |          |          |          |          |     |          |          |          |          |          |     |          |          |          |          |          |      |          |          |          |          |          |      |          |          |          |          |          |      |          |          |          |          |          |      |          |          |          |          |          |      |          |          |          |          |          |      |          |          |          |          |          |      |          |          |          |          |          |      |          |          |          |          |          |      |          |          |          |          |          |      |          |          |          |          |          |      |          |          |          |          |          |      |          |          |          |          |          |      |          |          |          |          |          |      |          |          |          |          |          |      |          |          |          |          |          |  |   |   |   |   |    |     |          |  |  |  |  |     |          |          |  |  |  |     |          |          |          |  |  |     |          |          |          |          |  |      |          |          |          |          |          |      |          |          |          |          |          |      |          |          |          |          |          |      |          |          |          |          |          |      |          |          |          |          |          |      |          |          |          |          |          |      |          |          |          |          |          |      |          |          |          |          |          |      |          |          |          |          |          |      |          |          |          |          |          |      |          |          |          |          |          |      |          |          |          |          |          |      |          |          |          |          |          |      |          |          |          |          |          |      |          |          |          |          |          |  |    |    |    |    |    |      |          |  |  |  |  |      |          |          |  |  |  |
| 3 C                                                                                                            | 5.313545                                                                                                                                                                                                                                                                                                                                                                                                                                                                                                                                                                                                                                                                                                                                                                                                                                                                                                                                                                                                                                                                                                                                                                                                                                                                                                                                                                                                                                                                                                                                                                                                                                                                                                                                                                                                                                                                                                                                                                                                                                                                                                                                                                                                                                                                                                                                                                                                                                                                                                                                                                                                                                                                                                                                                                                                                                                                                                                                                                                                                                                                                                                                                                                                                                                                                                                                                                                                                                                                                                                                                                                                                                                                                                                                                                                                                                                                                                                                                                                                                                                                                                                                                                                                                                                                                                                                                                                                                                                                                                                                                                                                                                                                                                                                                                                                                                                                                                                                                                                                                                                                                                                         | 1.745225 | 0.000000 |          |          |   |   |      |          |  |  |  |  |      |          |          |  |  |  |     |          |          |          |  |  |     |          |          |          |          |  |     |          |          |          |          |          |     |          |          |          |          |          |     |          |          |          |          |          |     |          |          |          |          |          |     |          |          |          |          |          |      |          |          |          |          |          |      |          |          |          |          |          |      |          |          |          |          |          |      |          |          |          |          |          |      |          |          |          |          |          |      |          |          |          |          |          |      |          |          |          |          |          |      |          |          |          |          |          |      |          |          |          |          |          |      |          |          |          |          |          |      |          |          |          |          |          |      |          |          |          |          |          |      |          |          |          |          |          |      |          |          |          |          |          |      |          |          |          |          |          |  |   |   |   |   |    |     |          |  |  |  |  |     |          |          |  |  |  |     |          |          |          |  |  |     |          |          |          |          |  |      |          |          |          |          |          |      |          |          |          |          |          |      |          |          |          |          |          |      |          |          |          |          |          |      |          |          |          |          |          |      |          |          |          |          |          |      |          |          |          |          |          |      |          |          |          |          |          |      |          |          |          |          |          |      |          |          |          |          |          |      |          |          |          |          |          |      |          |          |          |          |          |      |          |          |          |          |          |      |          |          |          |          |          |      |          |          |          |          |          |  |    |    |    |    |    |      |          |  |  |  |  |      |          |          |  |  |  |
| 4 O                                                                                                            | 6.360550                                                                                                                                                                                                                                                                                                                                                                                                                                                                                                                                                                                                                                                                                                                                                                                                                                                                                                                                                                                                                                                                                                                                                                                                                                                                                                                                                                                                                                                                                                                                                                                                                                                                                                                                                                                                                                                                                                                                                                                                                                                                                                                                                                                                                                                                                                                                                                                                                                                                                                                                                                                                                                                                                                                                                                                                                                                                                                                                                                                                                                                                                                                                                                                                                                                                                                                                                                                                                                                                                                                                                                                                                                                                                                                                                                                                                                                                                                                                                                                                                                                                                                                                                                                                                                                                                                                                                                                                                                                                                                                                                                                                                                                                                                                                                                                                                                                                                                                                                                                                                                                                                                                         | 2.888602 | 1.144157 | 0.000000 |          |   |   |      |          |  |  |  |  |      |          |          |  |  |  |     |          |          |          |  |  |     |          |          |          |          |  |     |          |          |          |          |          |     |          |          |          |          |          |     |          |          |          |          |          |     |          |          |          |          |          |     |          |          |          |          |          |      |          |          |          |          |          |      |          |          |          |          |          |      |          |          |          |          |          |      |          |          |          |          |          |      |          |          |          |          |          |      |          |          |          |          |          |      |          |          |          |          |          |      |          |          |          |          |          |      |          |          |          |          |          |      |          |          |          |          |          |      |          |          |          |          |          |      |          |          |          |          |          |      |          |          |          |          |          |      |          |          |          |          |          |      |          |          |          |          |          |  |   |   |   |   |    |     |          |  |  |  |  |     |          |          |  |  |  |     |          |          |          |  |  |     |          |          |          |          |  |      |          |          |          |          |          |      |          |          |          |          |          |      |          |          |          |          |          |      |          |          |          |          |          |      |          |          |          |          |          |      |          |          |          |          |          |      |          |          |          |          |          |      |          |          |          |          |          |      |          |          |          |          |          |      |          |          |          |          |          |      |          |          |          |          |          |      |          |          |          |          |          |      |          |          |          |          |          |      |          |          |          |          |          |      |          |          |          |          |          |  |    |    |    |    |    |      |          |  |  |  |  |      |          |          |  |  |  |
| 5 C                                                                                                            | 4.957910                                                                                                                                                                                                                                                                                                                                                                                                                                                                                                                                                                                                                                                                                                                                                                                                                                                                                                                                                                                                                                                                                                                                                                                                                                                                                                                                                                                                                                                                                                                                                                                                                                                                                                                                                                                                                                                                                                                                                                                                                                                                                                                                                                                                                                                                                                                                                                                                                                                                                                                                                                                                                                                                                                                                                                                                                                                                                                                                                                                                                                                                                                                                                                                                                                                                                                                                                                                                                                                                                                                                                                                                                                                                                                                                                                                                                                                                                                                                                                                                                                                                                                                                                                                                                                                                                                                                                                                                                                                                                                                                                                                                                                                                                                                                                                                                                                                                                                                                                                                                                                                                                                                         | 1.783929 | 2.534839 | 3.467042 | 0.000000 |   |   |      |          |  |  |  |  |      |          |          |  |  |  |     |          |          |          |  |  |     |          |          |          |          |  |     |          |          |          |          |          |     |          |          |          |          |          |     |          |          |          |          |          |     |          |          |          |          |          |     |          |          |          |          |          |      |          |          |          |          |          |      |          |          |          |          |          |      |          |          |          |          |          |      |          |          |          |          |          |      |          |          |          |          |          |      |          |          |          |          |          |      |          |          |          |          |          |      |          |          |          |          |          |      |          |          |          |          |          |      |          |          |          |          |          |      |          |          |          |          |          |      |          |          |          |          |          |      |          |          |          |          |          |      |          |          |          |          |          |      |          |          |          |          |          |  |   |   |   |   |    |     |          |  |  |  |  |     |          |          |  |  |  |     |          |          |          |  |  |     |          |          |          |          |  |      |          |          |          |          |          |      |          |          |          |          |          |      |          |          |          |          |          |      |          |          |          |          |          |      |          |          |          |          |          |      |          |          |          |          |          |      |          |          |          |          |          |      |          |          |          |          |          |      |          |          |          |          |          |      |          |          |          |          |          |      |          |          |          |          |          |      |          |          |          |          |          |      |          |          |          |          |          |      |          |          |          |          |          |      |          |          |          |          |          |  |    |    |    |    |    |      |          |  |  |  |  |      |          |          |  |  |  |
| 6 C                                                                                                            | 3.859109                                                                                                                                                                                                                                                                                                                                                                                                                                                                                                                                                                                                                                                                                                                                                                                                                                                                                                                                                                                                                                                                                                                                                                                                                                                                                                                                                                                                                                                                                                                                                                                                                                                                                                                                                                                                                                                                                                                                                                                                                                                                                                                                                                                                                                                                                                                                                                                                                                                                                                                                                                                                                                                                                                                                                                                                                                                                                                                                                                                                                                                                                                                                                                                                                                                                                                                                                                                                                                                                                                                                                                                                                                                                                                                                                                                                                                                                                                                                                                                                                                                                                                                                                                                                                                                                                                                                                                                                                                                                                                                                                                                                                                                                                                                                                                                                                                                                                                                                                                                                                                                                                                                         | 1.787914 | 2.685150 | 3.631437 | 2.851373 |   |   |      |          |  |  |  |  |      |          |          |  |  |  |     |          |          |          |  |  |     |          |          |          |          |  |     |          |          |          |          |          |     |          |          |          |          |          |     |          |          |          |          |          |     |          |          |          |          |          |     |          |          |          |          |          |      |          |          |          |          |          |      |          |          |          |          |          |      |          |          |          |          |          |      |          |          |          |          |          |      |          |          |          |          |          |      |          |          |          |          |          |      |          |          |          |          |          |      |          |          |          |          |          |      |          |          |          |          |          |      |          |          |          |          |          |      |          |          |          |          |          |      |          |          |          |          |          |      |          |          |          |          |          |      |          |          |          |          |          |      |          |          |          |          |          |  |   |   |   |   |    |     |          |  |  |  |  |     |          |          |  |  |  |     |          |          |          |  |  |     |          |          |          |          |  |      |          |          |          |          |          |      |          |          |          |          |          |      |          |          |          |          |          |      |          |          |          |          |          |      |          |          |          |          |          |      |          |          |          |          |          |      |          |          |          |          |          |      |          |          |          |          |          |      |          |          |          |          |          |      |          |          |          |          |          |      |          |          |          |          |          |      |          |          |          |          |          |      |          |          |          |          |          |      |          |          |          |          |          |      |          |          |          |          |          |  |    |    |    |    |    |      |          |  |  |  |  |      |          |          |  |  |  |
| 7 O                                                                                                            | 4.275373                                                                                                                                                                                                                                                                                                                                                                                                                                                                                                                                                                                                                                                                                                                                                                                                                                                                                                                                                                                                                                                                                                                                                                                                                                                                                                                                                                                                                                                                                                                                                                                                                                                                                                                                                                                                                                                                                                                                                                                                                                                                                                                                                                                                                                                                                                                                                                                                                                                                                                                                                                                                                                                                                                                                                                                                                                                                                                                                                                                                                                                                                                                                                                                                                                                                                                                                                                                                                                                                                                                                                                                                                                                                                                                                                                                                                                                                                                                                                                                                                                                                                                                                                                                                                                                                                                                                                                                                                                                                                                                                                                                                                                                                                                                                                                                                                                                                                                                                                                                                                                                                                                                         | 2.929938 | 3.648335 | 4.447306 | 3.844122 |   |   |      |          |  |  |  |  |      |          |          |  |  |  |     |          |          |          |  |  |     |          |          |          |          |  |     |          |          |          |          |          |     |          |          |          |          |          |     |          |          |          |          |          |     |          |          |          |          |          |     |          |          |          |          |          |      |          |          |          |          |          |      |          |          |          |          |          |      |          |          |          |          |          |      |          |          |          |          |          |      |          |          |          |          |          |      |          |          |          |          |          |      |          |          |          |          |          |      |          |          |          |          |          |      |          |          |          |          |          |      |          |          |          |          |          |      |          |          |          |          |          |      |          |          |          |          |          |      |          |          |          |          |          |      |          |          |          |          |          |      |          |          |          |          |          |  |   |   |   |   |    |     |          |  |  |  |  |     |          |          |  |  |  |     |          |          |          |  |  |     |          |          |          |          |  |      |          |          |          |          |          |      |          |          |          |          |          |      |          |          |          |          |          |      |          |          |          |          |          |      |          |          |          |          |          |      |          |          |          |          |          |      |          |          |          |          |          |      |          |          |          |          |          |      |          |          |          |          |          |      |          |          |          |          |          |      |          |          |          |          |          |      |          |          |          |          |          |      |          |          |          |          |          |      |          |          |          |          |          |      |          |          |          |          |          |  |    |    |    |    |    |      |          |  |  |  |  |      |          |          |  |  |  |
| 8 O                                                                                                            | 5.866552                                                                                                                                                                                                                                                                                                                                                                                                                                                                                                                                                                                                                                                                                                                                                                                                                                                                                                                                                                                                                                                                                                                                                                                                                                                                                                                                                                                                                                                                                                                                                                                                                                                                                                                                                                                                                                                                                                                                                                                                                                                                                                                                                                                                                                                                                                                                                                                                                                                                                                                                                                                                                                                                                                                                                                                                                                                                                                                                                                                                                                                                                                                                                                                                                                                                                                                                                                                                                                                                                                                                                                                                                                                                                                                                                                                                                                                                                                                                                                                                                                                                                                                                                                                                                                                                                                                                                                                                                                                                                                                                                                                                                                                                                                                                                                                                                                                                                                                                                                                                                                                                                                                         | 2.926428 | 3.461751 | 4.219112 | 1.142614 |   |   |      |          |  |  |  |  |      |          |          |  |  |  |     |          |          |          |  |  |     |          |          |          |          |  |     |          |          |          |          |          |     |          |          |          |          |          |     |          |          |          |          |          |     |          |          |          |          |          |     |          |          |          |          |          |      |          |          |          |          |          |      |          |          |          |          |          |      |          |          |          |          |          |      |          |          |          |          |          |      |          |          |          |          |          |      |          |          |          |          |          |      |          |          |          |          |          |      |          |          |          |          |          |      |          |          |          |          |          |      |          |          |          |          |          |      |          |          |          |          |          |      |          |          |          |          |          |      |          |          |          |          |          |      |          |          |          |          |          |      |          |          |          |          |          |  |   |   |   |   |    |     |          |  |  |  |  |     |          |          |  |  |  |     |          |          |          |  |  |     |          |          |          |          |  |      |          |          |          |          |          |      |          |          |          |          |          |      |          |          |          |          |          |      |          |          |          |          |          |      |          |          |          |          |          |      |          |          |          |          |          |      |          |          |          |          |          |      |          |          |          |          |          |      |          |          |          |          |          |      |          |          |          |          |          |      |          |          |          |          |          |      |          |          |          |          |          |      |          |          |          |          |          |      |          |          |          |          |          |      |          |          |          |          |          |  |    |    |    |    |    |      |          |  |  |  |  |      |          |          |  |  |  |
| 9 H                                                                                                            | 2.904638                                                                                                                                                                                                                                                                                                                                                                                                                                                                                                                                                                                                                                                                                                                                                                                                                                                                                                                                                                                                                                                                                                                                                                                                                                                                                                                                                                                                                                                                                                                                                                                                                                                                                                                                                                                                                                                                                                                                                                                                                                                                                                                                                                                                                                                                                                                                                                                                                                                                                                                                                                                                                                                                                                                                                                                                                                                                                                                                                                                                                                                                                                                                                                                                                                                                                                                                                                                                                                                                                                                                                                                                                                                                                                                                                                                                                                                                                                                                                                                                                                                                                                                                                                                                                                                                                                                                                                                                                                                                                                                                                                                                                                                                                                                                                                                                                                                                                                                                                                                                                                                                                                                         | 6.559161 | 7.916223 | 8.852209 | 7.827855 |   |   |      |          |  |  |  |  |      |          |          |  |  |  |     |          |          |          |  |  |     |          |          |          |          |  |     |          |          |          |          |          |     |          |          |          |          |          |     |          |          |          |          |          |     |          |          |          |          |          |     |          |          |          |          |          |      |          |          |          |          |          |      |          |          |          |          |          |      |          |          |          |          |          |      |          |          |          |          |          |      |          |          |          |          |          |      |          |          |          |          |          |      |          |          |          |          |          |      |          |          |          |          |          |      |          |          |          |          |          |      |          |          |          |          |          |      |          |          |          |          |          |      |          |          |          |          |          |      |          |          |          |          |          |      |          |          |          |          |          |      |          |          |          |          |          |  |   |   |   |   |    |     |          |  |  |  |  |     |          |          |  |  |  |     |          |          |          |  |  |     |          |          |          |          |  |      |          |          |          |          |          |      |          |          |          |          |          |      |          |          |          |          |          |      |          |          |          |          |          |      |          |          |          |          |          |      |          |          |          |          |          |      |          |          |          |          |          |      |          |          |          |          |          |      |          |          |          |          |          |      |          |          |          |          |          |      |          |          |          |          |          |      |          |          |          |          |          |      |          |          |          |          |          |      |          |          |          |          |          |      |          |          |          |          |          |  |    |    |    |    |    |      |          |  |  |  |  |      |          |          |  |  |  |
| 10 C                                                                                                           | 2.174057                                                                                                                                                                                                                                                                                                                                                                                                                                                                                                                                                                                                                                                                                                                                                                                                                                                                                                                                                                                                                                                                                                                                                                                                                                                                                                                                                                                                                                                                                                                                                                                                                                                                                                                                                                                                                                                                                                                                                                                                                                                                                                                                                                                                                                                                                                                                                                                                                                                                                                                                                                                                                                                                                                                                                                                                                                                                                                                                                                                                                                                                                                                                                                                                                                                                                                                                                                                                                                                                                                                                                                                                                                                                                                                                                                                                                                                                                                                                                                                                                                                                                                                                                                                                                                                                                                                                                                                                                                                                                                                                                                                                                                                                                                                                                                                                                                                                                                                                                                                                                                                                                                                         | 5.946135 | 7.425898 | 8.429119 | 7.098432 |   |   |      |          |  |  |  |  |      |          |          |  |  |  |     |          |          |          |  |  |     |          |          |          |          |  |     |          |          |          |          |          |     |          |          |          |          |          |     |          |          |          |          |          |     |          |          |          |          |          |     |          |          |          |          |          |      |          |          |          |          |          |      |          |          |          |          |          |      |          |          |          |          |          |      |          |          |          |          |          |      |          |          |          |          |          |      |          |          |          |          |          |      |          |          |          |          |          |      |          |          |          |          |          |      |          |          |          |          |          |      |          |          |          |          |          |      |          |          |          |          |          |      |          |          |          |          |          |      |          |          |          |          |          |      |          |          |          |          |          |      |          |          |          |          |          |  |   |   |   |   |    |     |          |  |  |  |  |     |          |          |  |  |  |     |          |          |          |  |  |     |          |          |          |          |  |      |          |          |          |          |          |      |          |          |          |          |          |      |          |          |          |          |          |      |          |          |          |          |          |      |          |          |          |          |          |      |          |          |          |          |          |      |          |          |          |          |          |      |          |          |          |          |          |      |          |          |          |          |          |      |          |          |          |          |          |      |          |          |          |          |          |      |          |          |          |          |          |      |          |          |          |          |          |      |          |          |          |          |          |      |          |          |          |          |          |  |    |    |    |    |    |      |          |  |  |  |  |      |          |          |  |  |  |
| 11 C                                                                                                           | 2.188868                                                                                                                                                                                                                                                                                                                                                                                                                                                                                                                                                                                                                                                                                                                                                                                                                                                                                                                                                                                                                                                                                                                                                                                                                                                                                                                                                                                                                                                                                                                                                                                                                                                                                                                                                                                                                                                                                                                                                                                                                                                                                                                                                                                                                                                                                                                                                                                                                                                                                                                                                                                                                                                                                                                                                                                                                                                                                                                                                                                                                                                                                                                                                                                                                                                                                                                                                                                                                                                                                                                                                                                                                                                                                                                                                                                                                                                                                                                                                                                                                                                                                                                                                                                                                                                                                                                                                                                                                                                                                                                                                                                                                                                                                                                                                                                                                                                                                                                                                                                                                                                                                                                         | 5.740758 | 7.363008 | 8.436766 | 6.580728 |   |   |      |          |  |  |  |  |      |          |          |  |  |  |     |          |          |          |  |  |     |          |          |          |          |  |     |          |          |          |          |          |     |          |          |          |          |          |     |          |          |          |          |          |     |          |          |          |          |          |     |          |          |          |          |          |      |          |          |          |          |          |      |          |          |          |          |          |      |          |          |          |          |          |      |          |          |          |          |          |      |          |          |          |          |          |      |          |          |          |          |          |      |          |          |          |          |          |      |          |          |          |          |          |      |          |          |          |          |          |      |          |          |          |          |          |      |          |          |          |          |          |      |          |          |          |          |          |      |          |          |          |          |          |      |          |          |          |          |          |      |          |          |          |          |          |  |   |   |   |   |    |     |          |  |  |  |  |     |          |          |  |  |  |     |          |          |          |  |  |     |          |          |          |          |  |      |          |          |          |          |          |      |          |          |          |          |          |      |          |          |          |          |          |      |          |          |          |          |          |      |          |          |          |          |          |      |          |          |          |          |          |      |          |          |          |          |          |      |          |          |          |          |          |      |          |          |          |          |          |      |          |          |          |          |          |      |          |          |          |          |          |      |          |          |          |          |          |      |          |          |          |          |          |      |          |          |          |          |          |      |          |          |          |          |          |  |    |    |    |    |    |      |          |  |  |  |  |      |          |          |  |  |  |
| 12 H                                                                                                           | 2.921498                                                                                                                                                                                                                                                                                                                                                                                                                                                                                                                                                                                                                                                                                                                                                                                                                                                                                                                                                                                                                                                                                                                                                                                                                                                                                                                                                                                                                                                                                                                                                                                                                                                                                                                                                                                                                                                                                                                                                                                                                                                                                                                                                                                                                                                                                                                                                                                                                                                                                                                                                                                                                                                                                                                                                                                                                                                                                                                                                                                                                                                                                                                                                                                                                                                                                                                                                                                                                                                                                                                                                                                                                                                                                                                                                                                                                                                                                                                                                                                                                                                                                                                                                                                                                                                                                                                                                                                                                                                                                                                                                                                                                                                                                                                                                                                                                                                                                                                                                                                                                                                                                                                         | 6.002531 | 7.301995 | 8.224085 | 7.316679 |   |   |      |          |  |  |  |  |      |          |          |  |  |  |     |          |          |          |  |  |     |          |          |          |          |  |     |          |          |          |          |          |     |          |          |          |          |          |     |          |          |          |          |          |     |          |          |          |          |          |     |          |          |          |          |          |      |          |          |          |          |          |      |          |          |          |          |          |      |          |          |          |          |          |      |          |          |          |          |          |      |          |          |          |          |          |      |          |          |          |          |          |      |          |          |          |          |          |      |          |          |          |          |          |      |          |          |          |          |          |      |          |          |          |          |          |      |          |          |          |          |          |      |          |          |          |          |          |      |          |          |          |          |          |      |          |          |          |          |          |      |          |          |          |          |          |  |   |   |   |   |    |     |          |  |  |  |  |     |          |          |  |  |  |     |          |          |          |  |  |     |          |          |          |          |  |      |          |          |          |          |          |      |          |          |          |          |          |      |          |          |          |          |          |      |          |          |          |          |          |      |          |          |          |          |          |      |          |          |          |          |          |      |          |          |          |          |          |      |          |          |          |          |          |      |          |          |          |          |          |      |          |          |          |          |          |      |          |          |          |          |          |      |          |          |          |          |          |      |          |          |          |          |          |      |          |          |          |          |          |      |          |          |          |          |          |  |    |    |    |    |    |      |          |  |  |  |  |      |          |          |  |  |  |
| 13 H                                                                                                           | 2.929963                                                                                                                                                                                                                                                                                                                                                                                                                                                                                                                                                                                                                                                                                                                                                                                                                                                                                                                                                                                                                                                                                                                                                                                                                                                                                                                                                                                                                                                                                                                                                                                                                                                                                                                                                                                                                                                                                                                                                                                                                                                                                                                                                                                                                                                                                                                                                                                                                                                                                                                                                                                                                                                                                                                                                                                                                                                                                                                                                                                                                                                                                                                                                                                                                                                                                                                                                                                                                                                                                                                                                                                                                                                                                                                                                                                                                                                                                                                                                                                                                                                                                                                                                                                                                                                                                                                                                                                                                                                                                                                                                                                                                                                                                                                                                                                                                                                                                                                                                                                                                                                                                                                         | 6.212477 | 7.811228 | 8.871811 | 6.934118 |   |   |      |          |  |  |  |  |      |          |          |  |  |  |     |          |          |          |  |  |     |          |          |          |          |  |     |          |          |          |          |          |     |          |          |          |          |          |     |          |          |          |          |          |     |          |          |          |          |          |     |          |          |          |          |          |      |          |          |          |          |          |      |          |          |          |          |          |      |          |          |          |          |          |      |          |          |          |          |          |      |          |          |          |          |          |      |          |          |          |          |          |      |          |          |          |          |          |      |          |          |          |          |          |      |          |          |          |          |          |      |          |          |          |          |          |      |          |          |          |          |          |      |          |          |          |          |          |      |          |          |          |          |          |      |          |          |          |          |          |      |          |          |          |          |          |  |   |   |   |   |    |     |          |  |  |  |  |     |          |          |  |  |  |     |          |          |          |  |  |     |          |          |          |          |  |      |          |          |          |          |          |      |          |          |          |          |          |      |          |          |          |          |          |      |          |          |          |          |          |      |          |          |          |          |          |      |          |          |          |          |          |      |          |          |          |          |          |      |          |          |          |          |          |      |          |          |          |          |          |      |          |          |          |          |          |      |          |          |          |          |          |      |          |          |          |          |          |      |          |          |          |          |          |      |          |          |          |          |          |      |          |          |          |          |          |  |    |    |    |    |    |      |          |  |  |  |  |      |          |          |  |  |  |
| 14 C                                                                                                           | 2.221670                                                                                                                                                                                                                                                                                                                                                                                                                                                                                                                                                                                                                                                                                                                                                                                                                                                                                                                                                                                                                                                                                                                                                                                                                                                                                                                                                                                                                                                                                                                                                                                                                                                                                                                                                                                                                                                                                                                                                                                                                                                                                                                                                                                                                                                                                                                                                                                                                                                                                                                                                                                                                                                                                                                                                                                                                                                                                                                                                                                                                                                                                                                                                                                                                                                                                                                                                                                                                                                                                                                                                                                                                                                                                                                                                                                                                                                                                                                                                                                                                                                                                                                                                                                                                                                                                                                                                                                                                                                                                                                                                                                                                                                                                                                                                                                                                                                                                                                                                                                                                                                                                                                         | 5.290713 | 6.997412 | 8.117064 | 5.925761 |   |   |      |          |  |  |  |  |      |          |          |  |  |  |     |          |          |          |  |  |     |          |          |          |          |  |     |          |          |          |          |          |     |          |          |          |          |          |     |          |          |          |          |          |     |          |          |          |          |          |     |          |          |          |          |          |      |          |          |          |          |          |      |          |          |          |          |          |      |          |          |          |          |          |      |          |          |          |          |          |      |          |          |          |          |          |      |          |          |          |          |          |      |          |          |          |          |          |      |          |          |          |          |          |      |          |          |          |          |          |      |          |          |          |          |          |      |          |          |          |          |          |      |          |          |          |          |          |      |          |          |          |          |          |      |          |          |          |          |          |      |          |          |          |          |          |  |   |   |   |   |    |     |          |  |  |  |  |     |          |          |  |  |  |     |          |          |          |  |  |     |          |          |          |          |  |      |          |          |          |          |          |      |          |          |          |          |          |      |          |          |          |          |          |      |          |          |          |          |          |      |          |          |          |          |          |      |          |          |          |          |          |      |          |          |          |          |          |      |          |          |          |          |          |      |          |          |          |          |          |      |          |          |          |          |          |      |          |          |          |          |          |      |          |          |          |          |          |      |          |          |          |          |          |      |          |          |          |          |          |      |          |          |          |          |          |  |    |    |    |    |    |      |          |  |  |  |  |      |          |          |  |  |  |
| 15 H                                                                                                           | 2.949402                                                                                                                                                                                                                                                                                                                                                                                                                                                                                                                                                                                                                                                                                                                                                                                                                                                                                                                                                                                                                                                                                                                                                                                                                                                                                                                                                                                                                                                                                                                                                                                                                                                                                                                                                                                                                                                                                                                                                                                                                                                                                                                                                                                                                                                                                                                                                                                                                                                                                                                                                                                                                                                                                                                                                                                                                                                                                                                                                                                                                                                                                                                                                                                                                                                                                                                                                                                                                                                                                                                                                                                                                                                                                                                                                                                                                                                                                                                                                                                                                                                                                                                                                                                                                                                                                                                                                                                                                                                                                                                                                                                                                                                                                                                                                                                                                                                                                                                                                                                                                                                                                                                         | 5.359480 | 7.103625 | 8.245181 | 5.661532 |   |   |      |          |  |  |  |  |      |          |          |  |  |  |     |          |          |          |  |  |     |          |          |          |          |  |     |          |          |          |          |          |     |          |          |          |          |          |     |          |          |          |          |          |     |          |          |          |          |          |     |          |          |          |          |          |      |          |          |          |          |          |      |          |          |          |          |          |      |          |          |          |          |          |      |          |          |          |          |          |      |          |          |          |          |          |      |          |          |          |          |          |      |          |          |          |          |          |      |          |          |          |          |          |      |          |          |          |          |          |      |          |          |          |          |          |      |          |          |          |          |          |      |          |          |          |          |          |      |          |          |          |          |          |      |          |          |          |          |          |      |          |          |          |          |          |  |   |   |   |   |    |     |          |  |  |  |  |     |          |          |  |  |  |     |          |          |          |  |  |     |          |          |          |          |  |      |          |          |          |          |          |      |          |          |          |          |          |      |          |          |          |          |          |      |          |          |          |          |          |      |          |          |          |          |          |      |          |          |          |          |          |      |          |          |          |          |          |      |          |          |          |          |          |      |          |          |          |          |          |      |          |          |          |          |          |      |          |          |          |          |          |      |          |          |          |          |          |      |          |          |          |          |          |      |          |          |          |          |          |      |          |          |          |          |          |  |    |    |    |    |    |      |          |  |  |  |  |      |          |          |  |  |  |
| 16 C                                                                                                           | 2.170347                                                                                                                                                                                                                                                                                                                                                                                                                                                                                                                                                                                                                                                                                                                                                                                                                                                                                                                                                                                                                                                                                                                                                                                                                                                                                                                                                                                                                                                                                                                                                                                                                                                                                                                                                                                                                                                                                                                                                                                                                                                                                                                                                                                                                                                                                                                                                                                                                                                                                                                                                                                                                                                                                                                                                                                                                                                                                                                                                                                                                                                                                                                                                                                                                                                                                                                                                                                                                                                                                                                                                                                                                                                                                                                                                                                                                                                                                                                                                                                                                                                                                                                                                                                                                                                                                                                                                                                                                                                                                                                                                                                                                                                                                                                                                                                                                                                                                                                                                                                                                                                                                                                         | 5.157370 | 6.762608 | 7.838854 | 6.023920 |   |   |      |          |  |  |  |  |      |          |          |  |  |  |     |          |          |          |  |  |     |          |          |          |          |  |     |          |          |          |          |          |     |          |          |          |          |          |     |          |          |          |          |          |     |          |          |          |          |          |     |          |          |          |          |          |      |          |          |          |          |          |      |          |          |          |          |          |      |          |          |          |          |          |      |          |          |          |          |          |      |          |          |          |          |          |      |          |          |          |          |          |      |          |          |          |          |          |      |          |          |          |          |          |      |          |          |          |          |          |      |          |          |          |          |          |      |          |          |          |          |          |      |          |          |          |          |          |      |          |          |          |          |          |      |          |          |          |          |          |      |          |          |          |          |          |  |   |   |   |   |    |     |          |  |  |  |  |     |          |          |  |  |  |     |          |          |          |  |  |     |          |          |          |          |  |      |          |          |          |          |          |      |          |          |          |          |          |      |          |          |          |          |          |      |          |          |          |          |          |      |          |          |          |          |          |      |          |          |          |          |          |      |          |          |          |          |          |      |          |          |          |          |          |      |          |          |          |          |          |      |          |          |          |          |          |      |          |          |          |          |          |      |          |          |          |          |          |      |          |          |          |          |          |      |          |          |          |          |          |      |          |          |          |          |          |  |    |    |    |    |    |      |          |  |  |  |  |      |          |          |  |  |  |
| 17 H                                                                                                           | 2.903874                                                                                                                                                                                                                                                                                                                                                                                                                                                                                                                                                                                                                                                                                                                                                                                                                                                                                                                                                                                                                                                                                                                                                                                                                                                                                                                                                                                                                                                                                                                                                                                                                                                                                                                                                                                                                                                                                                                                                                                                                                                                                                                                                                                                                                                                                                                                                                                                                                                                                                                                                                                                                                                                                                                                                                                                                                                                                                                                                                                                                                                                                                                                                                                                                                                                                                                                                                                                                                                                                                                                                                                                                                                                                                                                                                                                                                                                                                                                                                                                                                                                                                                                                                                                                                                                                                                                                                                                                                                                                                                                                                                                                                                                                                                                                                                                                                                                                                                                                                                                                                                                                                                         | 5.151491 | 6.704289 | 7.764052 | 5.894089 |   |   |      |          |  |  |  |  |      |          |          |  |  |  |     |          |          |          |  |  |     |          |          |          |          |  |     |          |          |          |          |          |     |          |          |          |          |          |     |          |          |          |          |          |     |          |          |          |          |          |     |          |          |          |          |          |      |          |          |          |          |          |      |          |          |          |          |          |      |          |          |          |          |          |      |          |          |          |          |          |      |          |          |          |          |          |      |          |          |          |          |          |      |          |          |          |          |          |      |          |          |          |          |          |      |          |          |          |          |          |      |          |          |          |          |          |      |          |          |          |          |          |      |          |          |          |          |          |      |          |          |          |          |          |      |          |          |          |          |          |      |          |          |          |          |          |  |   |   |   |   |    |     |          |  |  |  |  |     |          |          |  |  |  |     |          |          |          |  |  |     |          |          |          |          |  |      |          |          |          |          |          |      |          |          |          |          |          |      |          |          |          |          |          |      |          |          |          |          |          |      |          |          |          |          |          |      |          |          |          |          |          |      |          |          |          |          |          |      |          |          |          |          |          |      |          |          |          |          |          |      |          |          |          |          |          |      |          |          |          |          |          |      |          |          |          |          |          |      |          |          |          |          |          |      |          |          |          |          |          |      |          |          |          |          |          |  |    |    |    |    |    |      |          |  |  |  |  |      |          |          |  |  |  |
| 18 C                                                                                                           | 2.184181                                                                                                                                                                                                                                                                                                                                                                                                                                                                                                                                                                                                                                                                                                                                                                                                                                                                                                                                                                                                                                                                                                                                                                                                                                                                                                                                                                                                                                                                                                                                                                                                                                                                                                                                                                                                                                                                                                                                                                                                                                                                                                                                                                                                                                                                                                                                                                                                                                                                                                                                                                                                                                                                                                                                                                                                                                                                                                                                                                                                                                                                                                                                                                                                                                                                                                                                                                                                                                                                                                                                                                                                                                                                                                                                                                                                                                                                                                                                                                                                                                                                                                                                                                                                                                                                                                                                                                                                                                                                                                                                                                                                                                                                                                                                                                                                                                                                                                                                                                                                                                                                                                                         | 5.627221 | 7.085595 | 8.085836 | 6.805166 |   |   |      |          |  |  |  |  |      |          |          |  |  |  |     |          |          |          |  |  |     |          |          |          |          |  |     |          |          |          |          |          |     |          |          |          |          |          |     |          |          |          |          |          |     |          |          |          |          |          |     |          |          |          |          |          |      |          |          |          |          |          |      |          |          |          |          |          |      |          |          |          |          |          |      |          |          |          |          |          |      |          |          |          |          |          |      |          |          |          |          |          |      |          |          |          |          |          |      |          |          |          |          |          |      |          |          |          |          |          |      |          |          |          |          |          |      |          |          |          |          |          |      |          |          |          |          |          |      |          |          |          |          |          |      |          |          |          |          |          |      |          |          |          |          |          |  |   |   |   |   |    |     |          |  |  |  |  |     |          |          |  |  |  |     |          |          |          |  |  |     |          |          |          |          |  |      |          |          |          |          |          |      |          |          |          |          |          |      |          |          |          |          |          |      |          |          |          |          |          |      |          |          |          |          |          |      |          |          |          |          |          |      |          |          |          |          |          |      |          |          |          |          |          |      |          |          |          |          |          |      |          |          |          |          |          |      |          |          |          |          |          |      |          |          |          |          |          |      |          |          |          |          |          |      |          |          |          |          |          |      |          |          |          |          |          |  |    |    |    |    |    |      |          |  |  |  |  |      |          |          |  |  |  |
| 19 S                                                                                                           | 2.334536                                                                                                                                                                                                                                                                                                                                                                                                                                                                                                                                                                                                                                                                                                                                                                                                                                                                                                                                                                                                                                                                                                                                                                                                                                                                                                                                                                                                                                                                                                                                                                                                                                                                                                                                                                                                                                                                                                                                                                                                                                                                                                                                                                                                                                                                                                                                                                                                                                                                                                                                                                                                                                                                                                                                                                                                                                                                                                                                                                                                                                                                                                                                                                                                                                                                                                                                                                                                                                                                                                                                                                                                                                                                                                                                                                                                                                                                                                                                                                                                                                                                                                                                                                                                                                                                                                                                                                                                                                                                                                                                                                                                                                                                                                                                                                                                                                                                                                                                                                                                                                                                                                                         | 2.358861 | 3.980543 | 5.079919 | 3.007828 |   |   |      |          |  |  |  |  |      |          |          |  |  |  |     |          |          |          |  |  |     |          |          |          |          |  |     |          |          |          |          |          |     |          |          |          |          |          |     |          |          |          |          |          |     |          |          |          |          |          |     |          |          |          |          |          |      |          |          |          |          |          |      |          |          |          |          |          |      |          |          |          |          |          |      |          |          |          |          |          |      |          |          |          |          |          |      |          |          |          |          |          |      |          |          |          |          |          |      |          |          |          |          |          |      |          |          |          |          |          |      |          |          |          |          |          |      |          |          |          |          |          |      |          |          |          |          |          |      |          |          |          |          |          |      |          |          |          |          |          |      |          |          |          |          |          |  |   |   |   |   |    |     |          |  |  |  |  |     |          |          |  |  |  |     |          |          |          |  |  |     |          |          |          |          |  |      |          |          |          |          |          |      |          |          |          |          |          |      |          |          |          |          |          |      |          |          |          |          |          |      |          |          |          |          |          |      |          |          |          |          |          |      |          |          |          |          |          |      |          |          |          |          |          |      |          |          |          |          |          |      |          |          |          |          |          |      |          |          |          |          |          |      |          |          |          |          |          |      |          |          |          |          |          |      |          |          |          |          |          |      |          |          |          |          |          |  |    |    |    |    |    |      |          |  |  |  |  |      |          |          |  |  |  |
| 20 S                                                                                                           | 2.205855                                                                                                                                                                                                                                                                                                                                                                                                                                                                                                                                                                                                                                                                                                                                                                                                                                                                                                                                                                                                                                                                                                                                                                                                                                                                                                                                                                                                                                                                                                                                                                                                                                                                                                                                                                                                                                                                                                                                                                                                                                                                                                                                                                                                                                                                                                                                                                                                                                                                                                                                                                                                                                                                                                                                                                                                                                                                                                                                                                                                                                                                                                                                                                                                                                                                                                                                                                                                                                                                                                                                                                                                                                                                                                                                                                                                                                                                                                                                                                                                                                                                                                                                                                                                                                                                                                                                                                                                                                                                                                                                                                                                                                                                                                                                                                                                                                                                                                                                                                                                                                                                                                                         | 3.308083 | 4.241649 | 5.059153 | 4.990893 |   |   |      |          |  |  |  |  |      |          |          |  |  |  |     |          |          |          |  |  |     |          |          |          |          |  |     |          |          |          |          |          |     |          |          |          |          |          |     |          |          |          |          |          |     |          |          |          |          |          |     |          |          |          |          |          |      |          |          |          |          |          |      |          |          |          |          |          |      |          |          |          |          |          |      |          |          |          |          |          |      |          |          |          |          |          |      |          |          |          |          |          |      |          |          |          |          |          |      |          |          |          |          |          |      |          |          |          |          |          |      |          |          |          |          |          |      |          |          |          |          |          |      |          |          |          |          |          |      |          |          |          |          |          |      |          |          |          |          |          |      |          |          |          |          |          |  |   |   |   |   |    |     |          |  |  |  |  |     |          |          |  |  |  |     |          |          |          |  |  |     |          |          |          |          |  |      |          |          |          |          |          |      |          |          |          |          |          |      |          |          |          |          |          |      |          |          |          |          |          |      |          |          |          |          |          |      |          |          |          |          |          |      |          |          |          |          |          |      |          |          |          |          |          |      |          |          |          |          |          |      |          |          |          |          |          |      |          |          |          |          |          |      |          |          |          |          |          |      |          |          |          |          |          |      |          |          |          |          |          |      |          |          |          |          |          |  |    |    |    |    |    |      |          |  |  |  |  |      |          |          |  |  |  |
| 21 C                                                                                                           | 3.321914                                                                                                                                                                                                                                                                                                                                                                                                                                                                                                                                                                                                                                                                                                                                                                                                                                                                                                                                                                                                                                                                                                                                                                                                                                                                                                                                                                                                                                                                                                                                                                                                                                                                                                                                                                                                                                                                                                                                                                                                                                                                                                                                                                                                                                                                                                                                                                                                                                                                                                                                                                                                                                                                                                                                                                                                                                                                                                                                                                                                                                                                                                                                                                                                                                                                                                                                                                                                                                                                                                                                                                                                                                                                                                                                                                                                                                                                                                                                                                                                                                                                                                                                                                                                                                                                                                                                                                                                                                                                                                                                                                                                                                                                                                                                                                                                                                                                                                                                                                                                                                                                                                                         | 1.926126 | 2.907739 | 3.835499 | 3.012876 |   |   |      |          |  |  |  |  |      |          |          |  |  |  |     |          |          |          |  |  |     |          |          |          |          |  |     |          |          |          |          |          |     |          |          |          |          |          |     |          |          |          |          |          |     |          |          |          |          |          |     |          |          |          |          |          |      |          |          |          |          |          |      |          |          |          |          |          |      |          |          |          |          |          |      |          |          |          |          |          |      |          |          |          |          |          |      |          |          |          |          |          |      |          |          |          |          |          |      |          |          |          |          |          |      |          |          |          |          |          |      |          |          |          |          |          |      |          |          |          |          |          |      |          |          |          |          |          |      |          |          |          |          |          |      |          |          |          |          |          |      |          |          |          |          |          |  |   |   |   |   |    |     |          |  |  |  |  |     |          |          |  |  |  |     |          |          |          |  |  |     |          |          |          |          |  |      |          |          |          |          |          |      |          |          |          |          |          |      |          |          |          |          |          |      |          |          |          |          |          |      |          |          |          |          |          |      |          |          |          |          |          |      |          |          |          |          |          |      |          |          |          |          |          |      |          |          |          |          |          |      |          |          |          |          |          |      |          |          |          |          |          |      |          |          |          |          |          |      |          |          |          |          |          |      |          |          |          |          |          |      |          |          |          |          |          |  |    |    |    |    |    |      |          |  |  |  |  |      |          |          |  |  |  |
| 22 C                                                                                                           | 3.201101                                                                                                                                                                                                                                                                                                                                                                                                                                                                                                                                                                                                                                                                                                                                                                                                                                                                                                                                                                                                                                                                                                                                                                                                                                                                                                                                                                                                                                                                                                                                                                                                                                                                                                                                                                                                                                                                                                                                                                                                                                                                                                                                                                                                                                                                                                                                                                                                                                                                                                                                                                                                                                                                                                                                                                                                                                                                                                                                                                                                                                                                                                                                                                                                                                                                                                                                                                                                                                                                                                                                                                                                                                                                                                                                                                                                                                                                                                                                                                                                                                                                                                                                                                                                                                                                                                                                                                                                                                                                                                                                                                                                                                                                                                                                                                                                                                                                                                                                                                                                                                                                                                                         | 2.038794 | 2.691182 | 3.513578 | 3.688885 |   |   |      |          |  |  |  |  |      |          |          |  |  |  |     |          |          |          |  |  |     |          |          |          |          |  |     |          |          |          |          |          |     |          |          |          |          |          |     |          |          |          |          |          |     |          |          |          |          |          |     |          |          |          |          |          |      |          |          |          |          |          |      |          |          |          |          |          |      |          |          |          |          |          |      |          |          |          |          |          |      |          |          |          |          |          |      |          |          |          |          |          |      |          |          |          |          |          |      |          |          |          |          |          |      |          |          |          |          |          |      |          |          |          |          |          |      |          |          |          |          |          |      |          |          |          |          |          |      |          |          |          |          |          |      |          |          |          |          |          |      |          |          |          |          |          |  |   |   |   |   |    |     |          |  |  |  |  |     |          |          |  |  |  |     |          |          |          |  |  |     |          |          |          |          |  |      |          |          |          |          |          |      |          |          |          |          |          |      |          |          |          |          |          |      |          |          |          |          |          |      |          |          |          |          |          |      |          |          |          |          |          |      |          |          |          |          |          |      |          |          |          |          |          |      |          |          |          |          |          |      |          |          |          |          |          |      |          |          |          |          |          |      |          |          |          |          |          |      |          |          |          |          |          |      |          |          |          |          |          |      |          |          |          |          |          |  |    |    |    |    |    |      |          |  |  |  |  |      |          |          |  |  |  |
| 23 H                                                                                                           | 4.174394                                                                                                                                                                                                                                                                                                                                                                                                                                                                                                                                                                                                                                                                                                                                                                                                                                                                                                                                                                                                                                                                                                                                                                                                                                                                                                                                                                                                                                                                                                                                                                                                                                                                                                                                                                                                                                                                                                                                                                                                                                                                                                                                                                                                                                                                                                                                                                                                                                                                                                                                                                                                                                                                                                                                                                                                                                                                                                                                                                                                                                                                                                                                                                                                                                                                                                                                                                                                                                                                                                                                                                                                                                                                                                                                                                                                                                                                                                                                                                                                                                                                                                                                                                                                                                                                                                                                                                                                                                                                                                                                                                                                                                                                                                                                                                                                                                                                                                                                                                                                                                                                                                                         | 2.737515 | 2.696995 | 3.186475 | 4.316813 |   |   |      |          |  |  |  |  |      |          |          |  |  |  |     |          |          |          |  |  |     |          |          |          |          |  |     |          |          |          |          |          |     |          |          |          |          |          |     |          |          |          |          |          |     |          |          |          |          |          |     |          |          |          |          |          |      |          |          |          |          |          |      |          |          |          |          |          |      |          |          |          |          |          |      |          |          |          |          |          |      |          |          |          |          |          |      |          |          |          |          |          |      |          |          |          |          |          |      |          |          |          |          |          |      |          |          |          |          |          |      |          |          |          |          |          |      |          |          |          |          |          |      |          |          |          |          |          |      |          |          |          |          |          |      |          |          |          |          |          |      |          |          |          |          |          |  |   |   |   |   |    |     |          |  |  |  |  |     |          |          |  |  |  |     |          |          |          |  |  |     |          |          |          |          |  |      |          |          |          |          |          |      |          |          |          |          |          |      |          |          |          |          |          |      |          |          |          |          |          |      |          |          |          |          |          |      |          |          |          |          |          |      |          |          |          |          |          |      |          |          |          |          |          |      |          |          |          |          |          |      |          |          |          |          |          |      |          |          |          |          |          |      |          |          |          |          |          |      |          |          |          |          |          |      |          |          |          |          |          |      |          |          |          |          |          |  |    |    |    |    |    |      |          |  |  |  |  |      |          |          |  |  |  |
| 24 H                                                                                                           | 4.204185                                                                                                                                                                                                                                                                                                                                                                                                                                                                                                                                                                                                                                                                                                                                                                                                                                                                                                                                                                                                                                                                                                                                                                                                                                                                                                                                                                                                                                                                                                                                                                                                                                                                                                                                                                                                                                                                                                                                                                                                                                                                                                                                                                                                                                                                                                                                                                                                                                                                                                                                                                                                                                                                                                                                                                                                                                                                                                                                                                                                                                                                                                                                                                                                                                                                                                                                                                                                                                                                                                                                                                                                                                                                                                                                                                                                                                                                                                                                                                                                                                                                                                                                                                                                                                                                                                                                                                                                                                                                                                                                                                                                                                                                                                                                                                                                                                                                                                                                                                                                                                                                                                                         | 2.739210 | 3.335115 | 4.077252 | 3.405291 |   |   |      |          |  |  |  |  |      |          |          |  |  |  |     |          |          |          |  |  |     |          |          |          |          |  |     |          |          |          |          |          |     |          |          |          |          |          |     |          |          |          |          |          |     |          |          |          |          |          |     |          |          |          |          |          |      |          |          |          |          |          |      |          |          |          |          |          |      |          |          |          |          |          |      |          |          |          |          |          |      |          |          |          |          |          |      |          |          |          |          |          |      |          |          |          |          |          |      |          |          |          |          |          |      |          |          |          |          |          |      |          |          |          |          |          |      |          |          |          |          |          |      |          |          |          |          |          |      |          |          |          |          |          |      |          |          |          |          |          |      |          |          |          |          |          |  |   |   |   |   |    |     |          |  |  |  |  |     |          |          |  |  |  |     |          |          |          |  |  |     |          |          |          |          |  |      |          |          |          |          |          |      |          |          |          |          |          |      |          |          |          |          |          |      |          |          |          |          |          |      |          |          |          |          |          |      |          |          |          |          |          |      |          |          |          |          |          |      |          |          |          |          |          |      |          |          |          |          |          |      |          |          |          |          |          |      |          |          |          |          |          |      |          |          |          |          |          |      |          |          |          |          |          |      |          |          |          |          |          |      |          |          |          |          |          |  |    |    |    |    |    |      |          |  |  |  |  |      |          |          |  |  |  |
|                                                                                                                | 6                                                                                                                                                                                                                                                                                                                                                                                                                                                                                                                                                                                                                                                                                                                                                                                                                                                                                                                                                                                                                                                                                                                                                                                                                                                                                                                                                                                                                                                                                                                                                                                                                                                                                                                                                                                                                                                                                                                                                                                                                                                                                                                                                                                                                                                                                                                                                                                                                                                                                                                                                                                                                                                                                                                                                                                                                                                                                                                                                                                                                                                                                                                                                                                                                                                                                                                                                                                                                                                                                                                                                                                                                                                                                                                                                                                                                                                                                                                                                                                                                                                                                                                                                                                                                                                                                                                                                                                                                                                                                                                                                                                                                                                                                                                                                                                                                                                                                                                                                                                                                                                                                                                                | 7        | 8        | 9        | 10       |   |   |      |          |  |  |  |  |      |          |          |  |  |  |     |          |          |          |  |  |     |          |          |          |          |  |     |          |          |          |          |          |     |          |          |          |          |          |     |          |          |          |          |          |     |          |          |          |          |          |     |          |          |          |          |          |      |          |          |          |          |          |      |          |          |          |          |          |      |          |          |          |          |          |      |          |          |          |          |          |      |          |          |          |          |          |      |          |          |          |          |          |      |          |          |          |          |          |      |          |          |          |          |          |      |          |          |          |          |          |      |          |          |          |          |          |      |          |          |          |          |          |      |          |          |          |          |          |      |          |          |          |          |          |      |          |          |          |          |          |      |          |          |          |          |          |  |   |   |   |   |    |     |          |  |  |  |  |     |          |          |  |  |  |     |          |          |          |  |  |     |          |          |          |          |  |      |          |          |          |          |          |      |          |          |          |          |          |      |          |          |          |          |          |      |          |          |          |          |          |      |          |          |          |          |          |      |          |          |          |          |          |      |          |          |          |          |          |      |          |          |          |          |          |      |          |          |          |          |          |      |          |          |          |          |          |      |          |          |          |          |          |      |          |          |          |          |          |      |          |          |          |          |          |      |          |          |          |          |          |      |          |          |          |          |          |  |    |    |    |    |    |      |          |  |  |  |  |      |          |          |  |  |  |
| 6 C                                                                                                            | 0.000000                                                                                                                                                                                                                                                                                                                                                                                                                                                                                                                                                                                                                                                                                                                                                                                                                                                                                                                                                                                                                                                                                                                                                                                                                                                                                                                                                                                                                                                                                                                                                                                                                                                                                                                                                                                                                                                                                                                                                                                                                                                                                                                                                                                                                                                                                                                                                                                                                                                                                                                                                                                                                                                                                                                                                                                                                                                                                                                                                                                                                                                                                                                                                                                                                                                                                                                                                                                                                                                                                                                                                                                                                                                                                                                                                                                                                                                                                                                                                                                                                                                                                                                                                                                                                                                                                                                                                                                                                                                                                                                                                                                                                                                                                                                                                                                                                                                                                                                                                                                                                                                                                                                         |          |          |          |          |   |   |      |          |  |  |  |  |      |          |          |  |  |  |     |          |          |          |  |  |     |          |          |          |          |  |     |          |          |          |          |          |     |          |          |          |          |          |     |          |          |          |          |          |     |          |          |          |          |          |     |          |          |          |          |          |      |          |          |          |          |          |      |          |          |          |          |          |      |          |          |          |          |          |      |          |          |          |          |          |      |          |          |          |          |          |      |          |          |          |          |          |      |          |          |          |          |          |      |          |          |          |          |          |      |          |          |          |          |          |      |          |          |          |          |          |      |          |          |          |          |          |      |          |          |          |          |          |      |          |          |          |          |          |      |          |          |          |          |          |      |          |          |          |          |          |  |   |   |   |   |    |     |          |  |  |  |  |     |          |          |  |  |  |     |          |          |          |  |  |     |          |          |          |          |  |      |          |          |          |          |          |      |          |          |          |          |          |      |          |          |          |          |          |      |          |          |          |          |          |      |          |          |          |          |          |      |          |          |          |          |          |      |          |          |          |          |          |      |          |          |          |          |          |      |          |          |          |          |          |      |          |          |          |          |          |      |          |          |          |          |          |      |          |          |          |          |          |      |          |          |          |          |          |      |          |          |          |          |          |      |          |          |          |          |          |  |    |    |    |    |    |      |          |  |  |  |  |      |          |          |  |  |  |
| 7 O                                                                                                            | 1.142727                                                                                                                                                                                                                                                                                                                                                                                                                                                                                                                                                                                                                                                                                                                                                                                                                                                                                                                                                                                                                                                                                                                                                                                                                                                                                                                                                                                                                                                                                                                                                                                                                                                                                                                                                                                                                                                                                                                                                                                                                                                                                                                                                                                                                                                                                                                                                                                                                                                                                                                                                                                                                                                                                                                                                                                                                                                                                                                                                                                                                                                                                                                                                                                                                                                                                                                                                                                                                                                                                                                                                                                                                                                                                                                                                                                                                                                                                                                                                                                                                                                                                                                                                                                                                                                                                                                                                                                                                                                                                                                                                                                                                                                                                                                                                                                                                                                                                                                                                                                                                                                                                                                         | 0.000000 |          |          |          |   |   |      |          |  |  |  |  |      |          |          |  |  |  |     |          |          |          |  |  |     |          |          |          |          |  |     |          |          |          |          |          |     |          |          |          |          |          |     |          |          |          |          |          |     |          |          |          |          |          |     |          |          |          |          |          |      |          |          |          |          |          |      |          |          |          |          |          |      |          |          |          |          |          |      |          |          |          |          |          |      |          |          |          |          |          |      |          |          |          |          |          |      |          |          |          |          |          |      |          |          |          |          |          |      |          |          |          |          |          |      |          |          |          |          |          |      |          |          |          |          |          |      |          |          |          |          |          |      |          |          |          |          |          |      |          |          |          |          |          |      |          |          |          |          |          |  |   |   |   |   |    |     |          |  |  |  |  |     |          |          |  |  |  |     |          |          |          |  |  |     |          |          |          |          |  |      |          |          |          |          |          |      |          |          |          |          |          |      |          |          |          |          |          |      |          |          |          |          |          |      |          |          |          |          |          |      |          |          |          |          |          |      |          |          |          |          |          |      |          |          |          |          |          |      |          |          |          |          |          |      |          |          |          |          |          |      |          |          |          |          |          |      |          |          |          |          |          |      |          |          |          |          |          |      |          |          |          |          |          |      |          |          |          |          |          |  |    |    |    |    |    |      |          |  |  |  |  |      |          |          |  |  |  |
| 8 O                                                                                                            | 3.830834                                                                                                                                                                                                                                                                                                                                                                                                                                                                                                                                                                                                                                                                                                                                                                                                                                                                                                                                                                                                                                                                                                                                                                                                                                                                                                                                                                                                                                                                                                                                                                                                                                                                                                                                                                                                                                                                                                                                                                                                                                                                                                                                                                                                                                                                                                                                                                                                                                                                                                                                                                                                                                                                                                                                                                                                                                                                                                                                                                                                                                                                                                                                                                                                                                                                                                                                                                                                                                                                                                                                                                                                                                                                                                                                                                                                                                                                                                                                                                                                                                                                                                                                                                                                                                                                                                                                                                                                                                                                                                                                                                                                                                                                                                                                                                                                                                                                                                                                                                                                                                                                                                                         | 4.706798 | 0.000000 |          |          |   |   |      |          |  |  |  |  |      |          |          |  |  |  |     |          |          |          |  |  |     |          |          |          |          |  |     |          |          |          |          |          |     |          |          |          |          |          |     |          |          |          |          |          |     |          |          |          |          |          |     |          |          |          |          |          |      |          |          |          |          |          |      |          |          |          |          |          |      |          |          |          |          |          |      |          |          |          |          |          |      |          |          |          |          |          |      |          |          |          |          |          |      |          |          |          |          |          |      |          |          |          |          |          |      |          |          |          |          |          |      |          |          |          |          |          |      |          |          |          |          |          |      |          |          |          |          |          |      |          |          |          |          |          |      |          |          |          |          |          |      |          |          |          |          |          |  |   |   |   |   |    |     |          |  |  |  |  |     |          |          |  |  |  |     |          |          |          |  |  |     |          |          |          |          |  |      |          |          |          |          |          |      |          |          |          |          |          |      |          |          |          |          |          |      |          |          |          |          |          |      |          |          |          |          |          |      |          |          |          |          |          |      |          |          |          |          |          |      |          |          |          |          |          |      |          |          |          |          |          |      |          |          |          |          |          |      |          |          |          |          |          |      |          |          |          |          |          |      |          |          |          |          |          |      |          |          |          |          |          |      |          |          |          |          |          |  |    |    |    |    |    |      |          |  |  |  |  |      |          |          |  |  |  |
| 9 H                                                                                                            | 6.557542                                                                                                                                                                                                                                                                                                                                                                                                                                                                                                                                                                                                                                                                                                                                                                                                                                                                                                                                                                                                                                                                                                                                                                                                                                                                                                                                                                                                                                                                                                                                                                                                                                                                                                                                                                                                                                                                                                                                                                                                                                                                                                                                                                                                                                                                                                                                                                                                                                                                                                                                                                                                                                                                                                                                                                                                                                                                                                                                                                                                                                                                                                                                                                                                                                                                                                                                                                                                                                                                                                                                                                                                                                                                                                                                                                                                                                                                                                                                                                                                                                                                                                                                                                                                                                                                                                                                                                                                                                                                                                                                                                                                                                                                                                                                                                                                                                                                                                                                                                                                                                                                                                                         | 6.759213 | 8.725432 | 0.000000 |          |   |   |      |          |  |  |  |  |      |          |          |  |  |  |     |          |          |          |  |  |     |          |          |          |          |  |     |          |          |          |          |          |     |          |          |          |          |          |     |          |          |          |          |          |     |          |          |          |          |          |     |          |          |          |          |          |      |          |          |          |          |          |      |          |          |          |          |          |      |          |          |          |          |          |      |          |          |          |          |          |      |          |          |          |          |          |      |          |          |          |          |          |      |          |          |          |          |          |      |          |          |          |          |          |      |          |          |          |          |          |      |          |          |          |          |          |      |          |          |          |          |          |      |          |          |          |          |          |      |          |          |          |          |          |      |          |          |          |          |          |      |          |          |          |          |          |  |   |   |   |   |    |     |          |  |  |  |  |     |          |          |  |  |  |     |          |          |          |  |  |     |          |          |          |          |  |      |          |          |          |          |          |      |          |          |          |          |          |      |          |          |          |          |          |      |          |          |          |          |          |      |          |          |          |          |          |      |          |          |          |          |          |      |          |          |          |          |          |      |          |          |          |          |          |      |          |          |          |          |          |      |          |          |          |          |          |      |          |          |          |          |          |      |          |          |          |          |          |      |          |          |          |          |          |      |          |          |          |          |          |      |          |          |          |          |          |  |    |    |    |    |    |      |          |  |  |  |  |      |          |          |  |  |  |
| 10 C                                                                                                           | 5.848624                                                                                                                                                                                                                                                                                                                                                                                                                                                                                                                                                                                                                                                                                                                                                                                                                                                                                                                                                                                                                                                                                                                                                                                                                                                                                                                                                                                                                                                                                                                                                                                                                                                                                                                                                                                                                                                                                                                                                                                                                                                                                                                                                                                                                                                                                                                                                                                                                                                                                                                                                                                                                                                                                                                                                                                                                                                                                                                                                                                                                                                                                                                                                                                                                                                                                                                                                                                                                                                                                                                                                                                                                                                                                                                                                                                                                                                                                                                                                                                                                                                                                                                                                                                                                                                                                                                                                                                                                                                                                                                                                                                                                                                                                                                                                                                                                                                                                                                                                                                                                                                                                                                         | 6.021726 | 7.949830 | 1.080115 | 0.000000 |   |   |      |          |  |  |  |  |      |          |          |  |  |  |     |          |          |          |  |  |     |          |          |          |          |  |     |          |          |          |          |          |     |          |          |          |          |          |     |          |          |          |          |          |     |          |          |          |          |          |     |          |          |          |          |          |      |          |          |          |          |          |      |          |          |          |          |          |      |          |          |          |          |          |      |          |          |          |          |          |      |          |          |          |          |          |      |          |          |          |          |          |      |          |          |          |          |          |      |          |          |          |          |          |      |          |          |          |          |          |      |          |          |          |          |          |      |          |          |          |          |          |      |          |          |          |          |          |      |          |          |          |          |          |      |          |          |          |          |          |      |          |          |          |          |          |  |   |   |   |   |    |     |          |  |  |  |  |     |          |          |  |  |  |     |          |          |          |  |  |     |          |          |          |          |  |      |          |          |          |          |          |      |          |          |          |          |          |      |          |          |          |          |          |      |          |          |          |          |          |      |          |          |          |          |          |      |          |          |          |          |          |      |          |          |          |          |          |      |          |          |          |          |          |      |          |          |          |          |          |      |          |          |          |          |          |      |          |          |          |          |          |      |          |          |          |          |          |      |          |          |          |          |          |      |          |          |          |          |          |      |          |          |          |          |          |  |    |    |    |    |    |      |          |  |  |  |  |      |          |          |  |  |  |
| 11 C                                                                                                           | 5.871663                                                                                                                                                                                                                                                                                                                                                                                                                                                                                                                                                                                                                                                                                                                                                                                                                                                                                                                                                                                                                                                                                                                                                                                                                                                                                                                                                                                                                                                                                                                                                                                                                                                                                                                                                                                                                                                                                                                                                                                                                                                                                                                                                                                                                                                                                                                                                                                                                                                                                                                                                                                                                                                                                                                                                                                                                                                                                                                                                                                                                                                                                                                                                                                                                                                                                                                                                                                                                                                                                                                                                                                                                                                                                                                                                                                                                                                                                                                                                                                                                                                                                                                                                                                                                                                                                                                                                                                                                                                                                                                                                                                                                                                                                                                                                                                                                                                                                                                                                                                                                                                                                                                         | 6.188919 | 7.286627 | 2.252691 | 1.445780 |   |   |      |          |  |  |  |  |      |          |          |  |  |  |     |          |          |          |  |  |     |          |          |          |          |  |     |          |          |          |          |          |     |          |          |          |          |          |     |          |          |          |          |          |     |          |          |          |          |          |     |          |          |          |          |          |      |          |          |          |          |          |      |          |          |          |          |          |      |          |          |          |          |          |      |          |          |          |          |          |      |          |          |          |          |          |      |          |          |          |          |          |      |          |          |          |          |          |      |          |          |          |          |          |      |          |          |          |          |          |      |          |          |          |          |          |      |          |          |          |          |          |      |          |          |          |          |          |      |          |          |          |          |          |      |          |          |          |          |          |      |          |          |          |          |          |  |   |   |   |   |    |     |          |  |  |  |  |     |          |          |  |  |  |     |          |          |          |  |  |     |          |          |          |          |  |      |          |          |          |          |          |      |          |          |          |          |          |      |          |          |          |          |          |      |          |          |          |          |          |      |          |          |          |          |          |      |          |          |          |          |          |      |          |          |          |          |          |      |          |          |          |          |          |      |          |          |          |          |          |      |          |          |          |          |          |      |          |          |          |          |          |      |          |          |          |          |          |      |          |          |          |          |          |      |          |          |          |          |          |      |          |          |          |          |          |  |    |    |    |    |    |      |          |  |  |  |  |      |          |          |  |  |  |
| 12 H                                                                                                           | 5.272447                                                                                                                                                                                                                                                                                                                                                                                                                                                                                                                                                                                                                                                                                                                                                                                                                                                                                                                                                                                                                                                                                                                                                                                                                                                                                                                                                                                                                                                                                                                                                                                                                                                                                                                                                                                                                                                                                                                                                                                                                                                                                                                                                                                                                                                                                                                                                                                                                                                                                                                                                                                                                                                                                                                                                                                                                                                                                                                                                                                                                                                                                                                                                                                                                                                                                                                                                                                                                                                                                                                                                                                                                                                                                                                                                                                                                                                                                                                                                                                                                                                                                                                                                                                                                                                                                                                                                                                                                                                                                                                                                                                                                                                                                                                                                                                                                                                                                                                                                                                                                                                                                                                         | 5.038084 | 8.246747 | 2.698017 | 2.235990 |   |   |      |          |  |  |  |  |      |          |          |  |  |  |     |          |          |          |  |  |     |          |          |          |          |  |     |          |          |          |          |          |     |          |          |          |          |          |     |          |          |          |          |          |     |          |          |          |          |          |     |          |          |          |          |          |      |          |          |          |          |          |      |          |          |          |          |          |      |          |          |          |          |          |      |          |          |          |          |          |      |          |          |          |          |          |      |          |          |          |          |          |      |          |          |          |          |          |      |          |          |          |          |          |      |          |          |          |          |          |      |          |          |          |          |          |      |          |          |          |          |          |      |          |          |          |          |          |      |          |          |          |          |          |      |          |          |          |          |          |      |          |          |          |          |          |  |   |   |   |   |    |     |          |  |  |  |  |     |          |          |  |  |  |     |          |          |          |  |  |     |          |          |          |          |  |      |          |          |          |          |          |      |          |          |          |          |          |      |          |          |          |          |          |      |          |          |          |          |          |      |          |          |          |          |          |      |          |          |          |          |          |      |          |          |          |          |          |      |          |          |          |          |          |      |          |          |          |          |          |      |          |          |          |          |          |      |          |          |          |          |          |      |          |          |          |          |          |      |          |          |          |          |          |      |          |          |          |          |          |      |          |          |          |          |          |  |    |    |    |    |    |      |          |  |  |  |  |      |          |          |  |  |  |
| 13 H                                                                                                           | 6.599373                                                                                                                                                                                                                                                                                                                                                                                                                                                                                                                                                                                                                                                                                                                                                                                                                                                                                                                                                                                                                                                                                                                                                                                                                                                                                                                                                                                                                                                                                                                                                                                                                                                                                                                                                                                                                                                                                                                                                                                                                                                                                                                                                                                                                                                                                                                                                                                                                                                                                                                                                                                                                                                                                                                                                                                                                                                                                                                                                                                                                                                                                                                                                                                                                                                                                                                                                                                                                                                                                                                                                                                                                                                                                                                                                                                                                                                                                                                                                                                                                                                                                                                                                                                                                                                                                                                                                                                                                                                                                                                                                                                                                                                                                                                                                                                                                                                                                                                                                                                                                                                                                                                         | 7.038484 | 7.568317 | 2.707139 | 2.255110 |   |   |      |          |  |  |  |  |      |          |          |  |  |  |     |          |          |          |  |  |     |          |          |          |          |  |     |          |          |          |          |          |     |          |          |          |          |          |     |          |          |          |          |          |     |          |          |          |          |          |     |          |          |          |          |          |      |          |          |          |          |          |      |          |          |          |          |          |      |          |          |          |          |          |      |          |          |          |          |          |      |          |          |          |          |          |      |          |          |          |          |          |      |          |          |          |          |          |      |          |          |          |          |          |      |          |          |          |          |          |      |          |          |          |          |          |      |          |          |          |          |          |      |          |          |          |          |          |      |          |          |          |          |          |      |          |          |          |          |          |      |          |          |          |          |          |  |   |   |   |   |    |     |          |  |  |  |  |     |          |          |  |  |  |     |          |          |          |  |  |     |          |          |          |          |  |      |          |          |          |          |          |      |          |          |          |          |          |      |          |          |          |          |          |      |          |          |          |          |          |      |          |          |          |          |          |      |          |          |          |          |          |      |          |          |          |          |          |      |          |          |          |          |          |      |          |          |          |          |          |      |          |          |          |          |          |      |          |          |          |          |          |      |          |          |          |          |          |      |          |          |          |          |          |      |          |          |          |          |          |      |          |          |          |          |          |  |    |    |    |    |    |      |          |  |  |  |  |      |          |          |  |  |  |
| 14 C                                                                                                           | 5.174331                                                                                                                                                                                                                                                                                                                                                                                                                                                                                                                                                                                                                                                                                                                                                                                                                                                                                                                                                                                                                                                                                                                                                                                                                                                                                                                                                                                                                                                                                                                                                                                                                                                                                                                                                                                                                                                                                                                                                                                                                                                                                                                                                                                                                                                                                                                                                                                                                                                                                                                                                                                                                                                                                                                                                                                                                                                                                                                                                                                                                                                                                                                                                                                                                                                                                                                                                                                                                                                                                                                                                                                                                                                                                                                                                                                                                                                                                                                                                                                                                                                                                                                                                                                                                                                                                                                                                                                                                                                                                                                                                                                                                                                                                                                                                                                                                                                                                                                                                                                                                                                                                                                         | 5.381916 | 6.547732 | 3.357138 | 2.316150 |   |   |      |          |  |  |  |  |      |          |          |  |  |  |     |          |          |          |  |  |     |          |          |          |          |  |     |          |          |          |          |          |     |          |          |          |          |          |     |          |          |          |          |          |     |          |          |          |          |          |     |          |          |          |          |          |      |          |          |          |          |          |      |          |          |          |          |          |      |          |          |          |          |          |      |          |          |          |          |          |      |          |          |          |          |          |      |          |          |          |          |          |      |          |          |          |          |          |      |          |          |          |          |          |      |          |          |          |          |          |      |          |          |          |          |          |      |          |          |          |          |          |      |          |          |          |          |          |      |          |          |          |          |          |      |          |          |          |          |          |      |          |          |          |          |          |  |   |   |   |   |    |     |          |  |  |  |  |     |          |          |  |  |  |     |          |          |          |  |  |     |          |          |          |          |  |      |          |          |          |          |          |      |          |          |          |          |          |      |          |          |          |          |          |      |          |          |          |          |          |      |          |          |          |          |          |      |          |          |          |          |          |      |          |          |          |          |          |      |          |          |          |          |          |      |          |          |          |          |          |      |          |          |          |          |          |      |          |          |          |          |          |      |          |          |          |          |          |      |          |          |          |          |          |      |          |          |          |          |          |      |          |          |          |          |          |  |    |    |    |    |    |      |          |  |  |  |  |      |          |          |  |  |  |
| 15 H                                                                                                           | 5.344638                                                                                                                                                                                                                                                                                                                                                                                                                                                                                                                                                                                                                                                                                                                                                                                                                                                                                                                                                                                                                                                                                                                                                                                                                                                                                                                                                                                                                                                                                                                                                                                                                                                                                                                                                                                                                                                                                                                                                                                                                                                                                                                                                                                                                                                                                                                                                                                                                                                                                                                                                                                                                                                                                                                                                                                                                                                                                                                                                                                                                                                                                                                                                                                                                                                                                                                                                                                                                                                                                                                                                                                                                                                                                                                                                                                                                                                                                                                                                                                                                                                                                                                                                                                                                                                                                                                                                                                                                                                                                                                                                                                                                                                                                                                                                                                                                                                                                                                                                                                                                                                                                                                         | 5.612925 | 6.113503 | 4.368954 | 3.361591 |   |   |      |          |  |  |  |  |      |          |          |  |  |  |     |          |          |          |  |  |     |          |          |          |          |  |     |          |          |          |          |          |     |          |          |          |          |          |     |          |          |          |          |          |     |          |          |          |          |          |     |          |          |          |          |          |      |          |          |          |          |          |      |          |          |          |          |          |      |          |          |          |          |          |      |          |          |          |          |          |      |          |          |          |          |          |      |          |          |          |          |          |      |          |          |          |          |          |      |          |          |          |          |          |      |          |          |          |          |          |      |          |          |          |          |          |      |          |          |          |          |          |      |          |          |          |          |          |      |          |          |          |          |          |      |          |          |          |          |          |      |          |          |          |          |          |  |   |   |   |   |    |     |          |  |  |  |  |     |          |          |  |  |  |     |          |          |          |  |  |     |          |          |          |          |  |      |          |          |          |          |          |      |          |          |          |          |          |      |          |          |          |          |          |      |          |          |          |          |          |      |          |          |          |          |          |      |          |          |          |          |          |      |          |          |          |          |          |      |          |          |          |          |          |      |          |          |          |          |          |      |          |          |          |          |          |      |          |          |          |          |          |      |          |          |          |          |          |      |          |          |          |          |          |      |          |          |          |          |          |      |          |          |          |          |          |  |    |    |    |    |    |      |          |  |  |  |  |      |          |          |  |  |  |
| 16 C                                                                                                           | 4.600299                                                                                                                                                                                                                                                                                                                                                                                                                                                                                                                                                                                                                                                                                                                                                                                                                                                                                                                                                                                                                                                                                                                                                                                                                                                                                                                                                                                                                                                                                                                                                                                                                                                                                                                                                                                                                                                                                                                                                                                                                                                                                                                                                                                                                                                                                                                                                                                                                                                                                                                                                                                                                                                                                                                                                                                                                                                                                                                                                                                                                                                                                                                                                                                                                                                                                                                                                                                                                                                                                                                                                                                                                                                                                                                                                                                                                                                                                                                                                                                                                                                                                                                                                                                                                                                                                                                                                                                                                                                                                                                                                                                                                                                                                                                                                                                                                                                                                                                                                                                                                                                                                                                         | 4.546381 | 6.762919 | 3.353816 | 2.306932 |   |   |      |          |  |  |  |  |      |          |          |  |  |  |     |          |          |          |  |  |     |          |          |          |          |  |     |          |          |          |          |          |     |          |          |          |          |          |     |          |          |          |          |          |     |          |          |          |          |          |     |          |          |          |          |          |      |          |          |          |          |          |      |          |          |          |          |          |      |          |          |          |          |          |      |          |          |          |          |          |      |          |          |          |          |          |      |          |          |          |          |          |      |          |          |          |          |          |      |          |          |          |          |          |      |          |          |          |          |          |      |          |          |          |          |          |      |          |          |          |          |          |      |          |          |          |          |          |      |          |          |          |          |          |      |          |          |          |          |          |      |          |          |          |          |          |  |   |   |   |   |    |     |          |  |  |  |  |     |          |          |  |  |  |     |          |          |          |  |  |     |          |          |          |          |  |      |          |          |          |          |          |      |          |          |          |          |          |      |          |          |          |          |          |      |          |          |          |          |          |      |          |          |          |          |          |      |          |          |          |          |          |      |          |          |          |          |          |      |          |          |          |          |          |      |          |          |          |          |          |      |          |          |          |          |          |      |          |          |          |          |          |      |          |          |          |          |          |      |          |          |          |          |          |      |          |          |          |          |          |      |          |          |          |          |          |  |    |    |    |    |    |      |          |  |  |  |  |      |          |          |  |  |  |
| 17 H                                                                                                           | 4.283454                                                                                                                                                                                                                                                                                                                                                                                                                                                                                                                                                                                                                                                                                                                                                                                                                                                                                                                                                                                                                                                                                                                                                                                                                                                                                                                                                                                                                                                                                                                                                                                                                                                                                                                                                                                                                                                                                                                                                                                                                                                                                                                                                                                                                                                                                                                                                                                                                                                                                                                                                                                                                                                                                                                                                                                                                                                                                                                                                                                                                                                                                                                                                                                                                                                                                                                                                                                                                                                                                                                                                                                                                                                                                                                                                                                                                                                                                                                                                                                                                                                                                                                                                                                                                                                                                                                                                                                                                                                                                                                                                                                                                                                                                                                                                                                                                                                                                                                                                                                                                                                                                                                         | 4.021629 | 6.578216 | 4.364149 | 3.349748 |   |   |      |          |  |  |  |  |      |          |          |  |  |  |     |          |          |          |  |  |     |          |          |          |          |  |     |          |          |          |          |          |     |          |          |          |          |          |     |          |          |          |          |          |     |          |          |          |          |          |     |          |          |          |          |          |      |          |          |          |          |          |      |          |          |          |          |          |      |          |          |          |          |          |      |          |          |          |          |          |      |          |          |          |          |          |      |          |          |          |          |          |      |          |          |          |          |          |      |          |          |          |          |          |      |          |          |          |          |          |      |          |          |          |          |          |      |          |          |          |          |          |      |          |          |          |          |          |      |          |          |          |          |          |      |          |          |          |          |          |      |          |          |          |          |          |  |   |   |   |   |    |     |          |  |  |  |  |     |          |          |  |  |  |     |          |          |          |  |  |     |          |          |          |          |  |      |          |          |          |          |          |      |          |          |          |          |          |      |          |          |          |          |          |      |          |          |          |          |          |      |          |          |          |          |          |      |          |          |          |          |          |      |          |          |          |          |          |      |          |          |          |          |          |      |          |          |          |          |          |      |          |          |          |          |          |      |          |          |          |          |          |      |          |          |          |          |          |      |          |          |          |          |          |      |          |          |          |          |          |      |          |          |          |          |          |  |    |    |    |    |    |      |          |  |  |  |  |      |          |          |  |  |  |
| 18 C                                                                                                           | 5.118777                                                                                                                                                                                                                                                                                                                                                                                                                                                                                                                                                                                                                                                                                                                                                                                                                                                                                                                                                                                                                                                                                                                                                                                                                                                                                                                                                                                                                                                                                                                                                                                                                                                                                                                                                                                                                                                                                                                                                                                                                                                                                                                                                                                                                                                                                                                                                                                                                                                                                                                                                                                                                                                                                                                                                                                                                                                                                                                                                                                                                                                                                                                                                                                                                                                                                                                                                                                                                                                                                                                                                                                                                                                                                                                                                                                                                                                                                                                                                                                                                                                                                                                                                                                                                                                                                                                                                                                                                                                                                                                                                                                                                                                                                                                                                                                                                                                                                                                                                                                                                                                                                                                         | 5.057288 | 7.676317 | 2.232505 | 1.417954 |   |   |      |          |  |  |  |  |      |          |          |  |  |  |     |          |          |          |  |  |     |          |          |          |          |  |     |          |          |          |          |          |     |          |          |          |          |          |     |          |          |          |          |          |     |          |          |          |          |          |     |          |          |          |          |          |      |          |          |          |          |          |      |          |          |          |          |          |      |          |          |          |          |          |      |          |          |          |          |          |      |          |          |          |          |          |      |          |          |          |          |          |      |          |          |          |          |          |      |          |          |          |          |          |      |          |          |          |          |          |      |          |          |          |          |          |      |          |          |          |          |          |      |          |          |          |          |          |      |          |          |          |          |          |      |          |          |          |          |          |      |          |          |          |          |          |  |   |   |   |   |    |     |          |  |  |  |  |     |          |          |  |  |  |     |          |          |          |  |  |     |          |          |          |          |  |      |          |          |          |          |          |      |          |          |          |          |          |      |          |          |          |          |          |      |          |          |          |          |          |      |          |          |          |          |          |      |          |          |          |          |          |      |          |          |          |          |          |      |          |          |          |          |          |      |          |          |          |          |          |      |          |          |          |          |          |      |          |          |          |          |          |      |          |          |          |          |          |      |          |          |          |          |          |      |          |          |          |          |          |      |          |          |          |          |          |  |    |    |    |    |    |      |          |  |  |  |  |      |          |          |  |  |  |
| 19 S                                                                                                           | 3.353103                                                                                                                                                                                                                                                                                                                                                                                                                                                                                                                                                                                                                                                                                                                                                                                                                                                                                                                                                                                                                                                                                                                                                                                                                                                                                                                                                                                                                                                                                                                                                                                                                                                                                                                                                                                                                                                                                                                                                                                                                                                                                                                                                                                                                                                                                                                                                                                                                                                                                                                                                                                                                                                                                                                                                                                                                                                                                                                                                                                                                                                                                                                                                                                                                                                                                                                                                                                                                                                                                                                                                                                                                                                                                                                                                                                                                                                                                                                                                                                                                                                                                                                                                                                                                                                                                                                                                                                                                                                                                                                                                                                                                                                                                                                                                                                                                                                                                                                                                                                                                                                                                                                         | 4.249149 | 3.811533 | 5.006211 | 4.338093 |   |   |      |          |  |  |  |  |      |          |          |  |  |  |     |          |          |          |  |  |     |          |          |          |          |  |     |          |          |          |          |          |     |          |          |          |          |          |     |          |          |          |          |          |     |          |          |          |          |          |     |          |          |          |          |          |      |          |          |          |          |          |      |          |          |          |          |          |      |          |          |          |          |          |      |          |          |          |          |          |      |          |          |          |          |          |      |          |          |          |          |          |      |          |          |          |          |          |      |          |          |          |          |          |      |          |          |          |          |          |      |          |          |          |          |          |      |          |          |          |          |          |      |          |          |          |          |          |      |          |          |          |          |          |      |          |          |          |          |          |      |          |          |          |          |          |  |   |   |   |   |    |     |          |  |  |  |  |     |          |          |  |  |  |     |          |          |          |  |  |     |          |          |          |          |  |      |          |          |          |          |          |      |          |          |          |          |          |      |          |          |          |          |          |      |          |          |          |          |          |      |          |          |          |          |          |      |          |          |          |          |          |      |          |          |          |          |          |      |          |          |          |          |          |      |          |          |          |          |          |      |          |          |          |          |          |      |          |          |          |          |          |      |          |          |          |          |          |      |          |          |          |          |          |      |          |          |          |          |          |      |          |          |          |          |          |  |    |    |    |    |    |      |          |  |  |  |  |      |          |          |  |  |  |
| 20 S                                                                                                           | 3.490796                                                                                                                                                                                                                                                                                                                                                                                                                                                                                                                                                                                                                                                                                                                                                                                                                                                                                                                                                                                                                                                                                                                                                                                                                                                                                                                                                                                                                                                                                                                                                                                                                                                                                                                                                                                                                                                                                                                                                                                                                                                                                                                                                                                                                                                                                                                                                                                                                                                                                                                                                                                                                                                                                                                                                                                                                                                                                                                                                                                                                                                                                                                                                                                                                                                                                                                                                                                                                                                                                                                                                                                                                                                                                                                                                                                                                                                                                                                                                                                                                                                                                                                                                                                                                                                                                                                                                                                                                                                                                                                                                                                                                                                                                                                                                                                                                                                                                                                                                                                                                                                                                                                         | 3.999965 | 6.094664 | 3.888825 | 3.673230 |   |   |      |          |  |  |  |  |      |          |          |  |  |  |     |          |          |          |  |  |     |          |          |          |          |  |     |          |          |          |          |          |     |          |          |          |          |          |     |          |          |          |          |          |     |          |          |          |          |          |     |          |          |          |          |          |      |          |          |          |          |          |      |          |          |          |          |          |      |          |          |          |          |          |      |          |          |          |          |          |      |          |          |          |          |          |      |          |          |          |          |          |      |          |          |          |          |          |      |          |          |          |          |          |      |          |          |          |          |          |      |          |          |          |          |          |      |          |          |          |          |          |      |          |          |          |          |          |      |          |          |          |          |          |      |          |          |          |          |          |      |          |          |          |          |          |  |   |   |   |   |    |     |          |  |  |  |  |     |          |          |  |  |  |     |          |          |          |  |  |     |          |          |          |          |  |      |          |          |          |          |          |      |          |          |          |          |          |      |          |          |          |          |          |      |          |          |          |          |          |      |          |          |          |          |          |      |          |          |          |          |          |      |          |          |          |          |          |      |          |          |          |          |          |      |          |          |          |          |          |      |          |          |          |          |          |      |          |          |          |          |          |      |          |          |          |          |          |      |          |          |          |          |          |      |          |          |          |          |          |      |          |          |          |          |          |  |    |    |    |    |    |      |          |  |  |  |  |      |          |          |  |  |  |
| 21 C                                                                                                           | 3.457361                                                                                                                                                                                                                                                                                                                                                                                                                                                                                                                                                                                                                                                                                                                                                                                                                                                                                                                                                                                                                                                                                                                                                                                                                                                                                                                                                                                                                                                                                                                                                                                                                                                                                                                                                                                                                                                                                                                                                                                                                                                                                                                                                                                                                                                                                                                                                                                                                                                                                                                                                                                                                                                                                                                                                                                                                                                                                                                                                                                                                                                                                                                                                                                                                                                                                                                                                                                                                                                                                                                                                                                                                                                                                                                                                                                                                                                                                                                                                                                                                                                                                                                                                                                                                                                                                                                                                                                                                                                                                                                                                                                                                                                                                                                                                                                                                                                                                                                                                                                                                                                                                                                         | 4.519859 | 3.973856 | 5.716167 | 5.308616 |   |   |      |          |  |  |  |  |      |          |          |  |  |  |     |          |          |          |  |  |     |          |          |          |          |  |     |          |          |          |          |          |     |          |          |          |          |          |     |          |          |          |          |          |     |          |          |          |          |          |     |          |          |          |          |          |      |          |          |          |          |          |      |          |          |          |          |          |      |          |          |          |          |          |      |          |          |          |          |          |      |          |          |          |          |          |      |          |          |          |          |          |      |          |          |          |          |          |      |          |          |          |          |          |      |          |          |          |          |          |      |          |          |          |          |          |      |          |          |          |          |          |      |          |          |          |          |          |      |          |          |          |          |          |      |          |          |          |          |          |      |          |          |          |          |          |  |   |   |   |   |    |     |          |  |  |  |  |     |          |          |  |  |  |     |          |          |          |  |  |     |          |          |          |          |  |      |          |          |          |          |          |      |          |          |          |          |          |      |          |          |          |          |          |      |          |          |          |          |          |      |          |          |          |          |          |      |          |          |          |          |          |      |          |          |          |          |          |      |          |          |          |          |          |      |          |          |          |          |          |      |          |          |          |          |          |      |          |          |          |          |          |      |          |          |          |          |          |      |          |          |          |          |          |      |          |          |          |          |          |      |          |          |          |          |          |  |    |    |    |    |    |      |          |  |  |  |  |      |          |          |  |  |  |
| 22 C                                                                                                           | 3.014262                                                                                                                                                                                                                                                                                                                                                                                                                                                                                                                                                                                                                                                                                                                                                                                                                                                                                                                                                                                                                                                                                                                                                                                                                                                                                                                                                                                                                                                                                                                                                                                                                                                                                                                                                                                                                                                                                                                                                                                                                                                                                                                                                                                                                                                                                                                                                                                                                                                                                                                                                                                                                                                                                                                                                                                                                                                                                                                                                                                                                                                                                                                                                                                                                                                                                                                                                                                                                                                                                                                                                                                                                                                                                                                                                                                                                                                                                                                                                                                                                                                                                                                                                                                                                                                                                                                                                                                                                                                                                                                                                                                                                                                                                                                                                                                                                                                                                                                                                                                                                                                                                                                         | 3.924737 | 4.792846 | 5.419242 | 5.108480 |   |   |      |          |  |  |  |  |      |          |          |  |  |  |     |          |          |          |  |  |     |          |          |          |          |  |     |          |          |          |          |          |     |          |          |          |          |          |     |          |          |          |          |          |     |          |          |          |          |          |     |          |          |          |          |          |      |          |          |          |          |          |      |          |          |          |          |          |      |          |          |          |          |          |      |          |          |          |          |          |      |          |          |          |          |          |      |          |          |          |          |          |      |          |          |          |          |          |      |          |          |          |          |          |      |          |          |          |          |          |      |          |          |          |          |          |      |          |          |          |          |          |      |          |          |          |          |          |      |          |          |          |          |          |      |          |          |          |          |          |      |          |          |          |          |          |  |   |   |   |   |    |     |          |  |  |  |  |     |          |          |  |  |  |     |          |          |          |  |  |     |          |          |          |          |  |      |          |          |          |          |          |      |          |          |          |          |          |      |          |          |          |          |          |      |          |          |          |          |          |      |          |          |          |          |          |      |          |          |          |          |          |      |          |          |          |          |          |      |          |          |          |          |          |      |          |          |          |          |          |      |          |          |          |          |          |      |          |          |          |          |          |      |          |          |          |          |          |      |          |          |          |          |          |      |          |          |          |          |          |      |          |          |          |          |          |  |    |    |    |    |    |      |          |  |  |  |  |      |          |          |  |  |  |
| 23 H                                                                                                           | 3.676222                                                                                                                                                                                                                                                                                                                                                                                                                                                                                                                                                                                                                                                                                                                                                                                                                                                                                                                                                                                                                                                                                                                                                                                                                                                                                                                                                                                                                                                                                                                                                                                                                                                                                                                                                                                                                                                                                                                                                                                                                                                                                                                                                                                                                                                                                                                                                                                                                                                                                                                                                                                                                                                                                                                                                                                                                                                                                                                                                                                                                                                                                                                                                                                                                                                                                                                                                                                                                                                                                                                                                                                                                                                                                                                                                                                                                                                                                                                                                                                                                                                                                                                                                                                                                                                                                                                                                                                                                                                                                                                                                                                                                                                                                                                                                                                                                                                                                                                                                                                                                                                                                                                         | 4.531570 | 5.394308 | 6.095971 | 5.926312 |   |   |      |          |  |  |  |  |      |          |          |  |  |  |     |          |          |          |  |  |     |          |          |          |          |  |     |          |          |          |          |          |     |          |          |          |          |          |     |          |          |          |          |          |     |          |          |          |          |          |     |          |          |          |          |          |      |          |          |          |          |          |      |          |          |          |          |          |      |          |          |          |          |          |      |          |          |          |          |          |      |          |          |          |          |          |      |          |          |          |          |          |      |          |          |          |          |          |      |          |          |          |          |          |      |          |          |          |          |          |      |          |          |          |          |          |      |          |          |          |          |          |      |          |          |          |          |          |      |          |          |          |          |          |      |          |          |          |          |          |      |          |          |          |          |          |  |   |   |   |   |    |     |          |  |  |  |  |     |          |          |  |  |  |     |          |          |          |  |  |     |          |          |          |          |  |      |          |          |          |          |          |      |          |          |          |          |          |      |          |          |          |          |          |      |          |          |          |          |          |      |          |          |          |          |          |      |          |          |          |          |          |      |          |          |          |          |          |      |          |          |          |          |          |      |          |          |          |          |          |      |          |          |          |          |          |      |          |          |          |          |          |      |          |          |          |          |          |      |          |          |          |          |          |      |          |          |          |          |          |      |          |          |          |          |          |  |    |    |    |    |    |      |          |  |  |  |  |      |          |          |  |  |  |
| 24 H                                                                                                           | 4.423837                                                                                                                                                                                                                                                                                                                                                                                                                                                                                                                                                                                                                                                                                                                                                                                                                                                                                                                                                                                                                                                                                                                                                                                                                                                                                                                                                                                                                                                                                                                                                                                                                                                                                                                                                                                                                                                                                                                                                                                                                                                                                                                                                                                                                                                                                                                                                                                                                                                                                                                                                                                                                                                                                                                                                                                                                                                                                                                                                                                                                                                                                                                                                                                                                                                                                                                                                                                                                                                                                                                                                                                                                                                                                                                                                                                                                                                                                                                                                                                                                                                                                                                                                                                                                                                                                                                                                                                                                                                                                                                                                                                                                                                                                                                                                                                                                                                                                                                                                                                                                                                                                                                         | 5.522957 | 4.180275 | 6.370706 | 6.049992 |   |   |      |          |  |  |  |  |      |          |          |  |  |  |     |          |          |          |  |  |     |          |          |          |          |  |     |          |          |          |          |          |     |          |          |          |          |          |     |          |          |          |          |          |     |          |          |          |          |          |     |          |          |          |          |          |      |          |          |          |          |          |      |          |          |          |          |          |      |          |          |          |          |          |      |          |          |          |          |          |      |          |          |          |          |          |      |          |          |          |          |          |      |          |          |          |          |          |      |          |          |          |          |          |      |          |          |          |          |          |      |          |          |          |          |          |      |          |          |          |          |          |      |          |          |          |          |          |      |          |          |          |          |          |      |          |          |          |          |          |      |          |          |          |          |          |  |   |   |   |   |    |     |          |  |  |  |  |     |          |          |  |  |  |     |          |          |          |  |  |     |          |          |          |          |  |      |          |          |          |          |          |      |          |          |          |          |          |      |          |          |          |          |          |      |          |          |          |          |          |      |          |          |          |          |          |      |          |          |          |          |          |      |          |          |          |          |          |      |          |          |          |          |          |      |          |          |          |          |          |      |          |          |          |          |          |      |          |          |          |          |          |      |          |          |          |          |          |      |          |          |          |          |          |      |          |          |          |          |          |      |          |          |          |          |          |  |    |    |    |    |    |      |          |  |  |  |  |      |          |          |  |  |  |
|                                                                                                                | 11                                                                                                                                                                                                                                                                                                                                                                                                                                                                                                                                                                                                                                                                                                                                                                                                                                                                                                                                                                                                                                                                                                                                                                                                                                                                                                                                                                                                                                                                                                                                                                                                                                                                                                                                                                                                                                                                                                                                                                                                                                                                                                                                                                                                                                                                                                                                                                                                                                                                                                                                                                                                                                                                                                                                                                                                                                                                                                                                                                                                                                                                                                                                                                                                                                                                                                                                                                                                                                                                                                                                                                                                                                                                                                                                                                                                                                                                                                                                                                                                                                                                                                                                                                                                                                                                                                                                                                                                                                                                                                                                                                                                                                                                                                                                                                                                                                                                                                                                                                                                                                                                                                                               | 12       | 13       | 14       | 15       |   |   |      |          |  |  |  |  |      |          |          |  |  |  |     |          |          |          |  |  |     |          |          |          |          |  |     |          |          |          |          |          |     |          |          |          |          |          |     |          |          |          |          |          |     |          |          |          |          |          |     |          |          |          |          |          |      |          |          |          |          |          |      |          |          |          |          |          |      |          |          |          |          |          |      |          |          |          |          |          |      |          |          |          |          |          |      |          |          |          |          |          |      |          |          |          |          |          |      |          |          |          |          |          |      |          |          |          |          |          |      |          |          |          |          |          |      |          |          |          |          |          |      |          |          |          |          |          |      |          |          |          |          |          |      |          |          |          |          |          |      |          |          |          |          |          |  |   |   |   |   |    |     |          |  |  |  |  |     |          |          |  |  |  |     |          |          |          |  |  |     |          |          |          |          |  |      |          |          |          |          |          |      |          |          |          |          |          |      |          |          |          |          |          |      |          |          |          |          |          |      |          |          |          |          |          |      |          |          |          |          |          |      |          |          |          |          |          |      |          |          |          |          |          |      |          |          |          |          |          |      |          |          |          |          |          |      |          |          |          |          |          |      |          |          |          |          |          |      |          |          |          |          |          |      |          |          |          |          |          |      |          |          |          |          |          |  |    |    |    |    |    |      |          |  |  |  |  |      |          |          |  |  |  |
| 11 C                                                                                                           | 0.000000                                                                                                                                                                                                                                                                                                                                                                                                                                                                                                                                                                                                                                                                                                                                                                                                                                                                                                                                                                                                                                                                                                                                                                                                                                                                                                                                                                                                                                                                                                                                                                                                                                                                                                                                                                                                                                                                                                                                                                                                                                                                                                                                                                                                                                                                                                                                                                                                                                                                                                                                                                                                                                                                                                                                                                                                                                                                                                                                                                                                                                                                                                                                                                                                                                                                                                                                                                                                                                                                                                                                                                                                                                                                                                                                                                                                                                                                                                                                                                                                                                                                                                                                                                                                                                                                                                                                                                                                                                                                                                                                                                                                                                                                                                                                                                                                                                                                                                                                                                                                                                                                                                                         |          |          |          |          |   |   |      |          |  |  |  |  |      |          |          |  |  |  |     |          |          |          |  |  |     |          |          |          |          |  |     |          |          |          |          |          |     |          |          |          |          |          |     |          |          |          |          |          |     |          |          |          |          |          |     |          |          |          |          |          |      |          |          |          |          |          |      |          |          |          |          |          |      |          |          |          |          |          |      |          |          |          |          |          |      |          |          |          |          |          |      |          |          |          |          |          |      |          |          |          |          |          |      |          |          |          |          |          |      |          |          |          |          |          |      |          |          |          |          |          |      |          |          |          |          |          |      |          |          |          |          |          |      |          |          |          |          |          |      |          |          |          |          |          |      |          |          |          |          |          |  |   |   |   |   |    |     |          |  |  |  |  |     |          |          |  |  |  |     |          |          |          |  |  |     |          |          |          |          |  |      |          |          |          |          |          |      |          |          |          |          |          |      |          |          |          |          |          |      |          |          |          |          |          |      |          |          |          |          |          |      |          |          |          |          |          |      |          |          |          |          |          |      |          |          |          |          |          |      |          |          |          |          |          |      |          |          |          |          |          |      |          |          |          |          |          |      |          |          |          |          |          |      |          |          |          |          |          |      |          |          |          |          |          |      |          |          |          |          |          |  |    |    |    |    |    |      |          |  |  |  |  |      |          |          |  |  |  |
| 12 H                                                                                                           | 3.367339                                                                                                                                                                                                                                                                                                                                                                                                                                                                                                                                                                                                                                                                                                                                                                                                                                                                                                                                                                                                                                                                                                                                                                                                                                                                                                                                                                                                                                                                                                                                                                                                                                                                                                                                                                                                                                                                                                                                                                                                                                                                                                                                                                                                                                                                                                                                                                                                                                                                                                                                                                                                                                                                                                                                                                                                                                                                                                                                                                                                                                                                                                                                                                                                                                                                                                                                                                                                                                                                                                                                                                                                                                                                                                                                                                                                                                                                                                                                                                                                                                                                                                                                                                                                                                                                                                                                                                                                                                                                                                                                                                                                                                                                                                                                                                                                                                                                                                                                                                                                                                                                                                                         | 0.000000 |          |          |          |   |   |      |          |  |  |  |  |      |          |          |  |  |  |     |          |          |          |  |  |     |          |          |          |          |  |     |          |          |          |          |          |     |          |          |          |          |          |     |          |          |          |          |          |     |          |          |          |          |          |     |          |          |          |          |          |      |          |          |          |          |          |      |          |          |          |          |          |      |          |          |          |          |          |      |          |          |          |          |          |      |          |          |          |          |          |      |          |          |          |          |          |      |          |          |          |          |          |      |          |          |          |          |          |      |          |          |          |          |          |      |          |          |          |          |          |      |          |          |          |          |          |      |          |          |          |          |          |      |          |          |          |          |          |      |          |          |          |          |          |      |          |          |          |          |          |  |   |   |   |   |    |     |          |  |  |  |  |     |          |          |  |  |  |     |          |          |          |  |  |     |          |          |          |          |  |      |          |          |          |          |          |      |          |          |          |          |          |      |          |          |          |          |          |      |          |          |          |          |          |      |          |          |          |          |          |      |          |          |          |          |          |      |          |          |          |          |          |      |          |          |          |          |          |      |          |          |          |          |          |      |          |          |          |          |          |      |          |          |          |          |          |      |          |          |          |          |          |      |          |          |          |          |          |      |          |          |          |          |          |      |          |          |          |          |          |  |    |    |    |    |    |      |          |  |  |  |  |      |          |          |  |  |  |



|  |      |          |          |          |          |          |
|--|------|----------|----------|----------|----------|----------|
|  | 13 H | 1.079665 | 4.375216 | 0.000000 |          |          |
|  | 14 C | 1.420071 | 3.366852 | 2.235348 | 0.000000 |          |
|  | 15 H | 2.232931 | 4.376061 | 2.694044 | 1.080112 | 0.000000 |
|  | 16 C | 2.304035 | 2.254139 | 3.348622 | 1.426099 | 2.235939 |
|  | 17 H | 3.346977 | 2.710211 | 4.358229 | 2.237808 | 2.690789 |
|  | 18 C | 2.320675 | 1.079711 | 3.361401 | 2.325111 | 3.368307 |
|  | 19 S | 3.742365 | 5.171518 | 4.012321 | 3.476082 | 3.484518 |
|  | 20 S | 4.194392 | 3.710627 | 4.780699 | 4.414614 | 5.113697 |
|  | 21 C | 5.034060 | 5.980028 | 5.237886 | 5.041731 | 5.209371 |
|  | 22 C | 5.222906 | 5.345662 | 5.626534 | 5.268322 | 5.667806 |
|  | 23 H | 6.162164 | 6.070218 | 6.526192 | 6.304662 | 6.741613 |
|  | 24 H | 5.671205 | 6.935458 | 5.689043 | 5.798892 | 5.885492 |
|  |      | 16       | 17       | 18       | 19       | 20       |
|  | 16 C | 0.000000 |          |          |          |          |
|  | 17 H | 1.080223 | 0.000000 |          |          |          |
|  | 18 C | 1.443512 | 2.252988 | 0.000000 |          |          |
|  | 19 S | 3.894843 | 4.273895 | 4.438102 | 0.000000 |          |
|  | 20 S | 4.019393 | 4.490165 | 3.571922 | 3.112860 | 0.000000 |
|  | 21 C | 5.253394 | 5.628669 | 5.457614 | 1.775227 | 2.808831 |
|  | 22 C | 5.120683 | 5.446156 | 5.065202 | 2.615842 | 1.803393 |
|  | 23 H | 6.104394 | 6.423773 | 5.909758 | 3.647975 | 2.395622 |
|  | 24 H | 6.177165 | 6.608775 | 6.366521 | 2.496442 | 3.698445 |
|  |      | 21       | 22       | 23       | 24       |          |
|  | 21 C | 0.000000 |          |          |          |          |
|  | 22 C | 1.423067 | 0.000000 |          |          |          |
|  | 23 H | 2.163524 | 1.087635 | 0.000000 |          |          |
|  | 24 H | 1.083873 | 2.263229 | 2.629985 | 0.000000 |          |

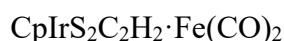

|  |      |          |          |          |          |          |
|--|------|----------|----------|----------|----------|----------|
|  |      | 1        | 2        | 3        | 4        | 5        |
|  | 1 Ir | 0.000000 |          |          |          |          |
|  | 2 Fe | 2.639539 | 0.000000 |          |          |          |
|  | 3 C  | 3.085363 | 1.748844 | 0.000000 |          |          |
|  | 4 C  | 4.380928 | 1.743422 | 2.460315 | 0.000000 |          |
|  | 5 O  | 5.526922 | 2.891346 | 3.347663 | 1.148328 | 0.000000 |
|  | 6 O  | 3.813512 | 2.898283 | 1.149441 | 3.369820 | 4.048892 |
|  | 7 H  | 2.938417 | 5.395819 | 5.738645 | 7.096920 | 8.227457 |
|  | 8 C  | 2.199744 | 4.767469 | 4.911852 | 6.489393 | 7.625778 |
|  | 9 C  | 2.198469 | 4.319855 | 4.031722 | 5.926584 | 7.011289 |
|  | 10 H | 2.938670 | 5.397845 | 5.742785 | 7.098297 | 8.228355 |
|  | 11 H | 2.941281 | 4.637771 | 4.259628 | 6.105542 | 7.129817 |
|  | 12 C | 2.219053 | 4.044191 | 3.403018 | 5.574852 | 6.626692 |
|  | 13 H | 2.948163 | 4.107667 | 3.019319 | 5.409392 | 6.363340 |
|  | 14 C | 2.198579 | 4.321835 | 4.036618 | 5.927816 | 7.012017 |
|  | 15 H | 2.941044 | 4.640736 | 4.268001 | 6.107277 | 7.130651 |
|  | 16 C | 2.199988 | 4.768750 | 4.914467 | 6.490256 | 7.626358 |
|  | 17 S | 2.287450 | 2.293690 | 3.382899 | 3.623858 | 4.658852 |

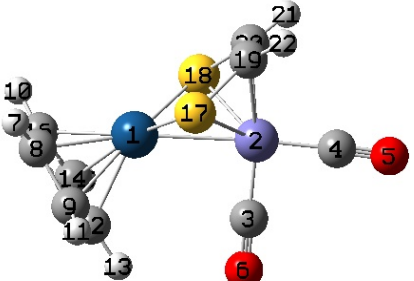

1. -2661.045558 0.0

|  |      |          |          |          |          |          |
|--|------|----------|----------|----------|----------|----------|
|  | 18 S | 2.287399 | 2.293189 | 3.383446 | 3.620546 | 4.654275 |
|  | 19 C | 3.177615 | 2.093181 | 3.774279 | 2.945417 | 3.869762 |
|  | 20 C | 3.177563 | 2.093120 | 3.774678 | 2.943905 | 3.867635 |
|  | 21 H | 4.218586 | 2.847189 | 4.474727 | 3.144306 | 3.817738 |
|  | 22 H | 4.218641 | 2.847587 | 4.474460 | 3.147369 | 3.822170 |
|  |      | 6        | 7        | 8        | 9        | 10       |
|  | 6 O  | 0.000000 |          |          |          |          |
|  | 7 H  | 6.229072 | 0.000000 |          |          |          |
|  | 8 C  | 5.329370 | 1.079624 | 0.000000 |          |          |
|  | 9 C  | 4.245713 | 2.248428 | 1.436312 | 0.000000 |          |
|  | 10 H | 6.234194 | 2.695169 | 2.237571 | 3.357699 | 0.000000 |
|  | 11 H | 4.391482 | 2.706675 | 2.247641 | 1.080047 | 4.367923 |
|  | 12 C | 3.433963 | 3.362320 | 2.319515 | 1.427456 | 3.362289 |
|  | 13 H | 2.713757 | 4.373330 | 3.363739 | 2.240382 | 4.373315 |
|  | 14 C | 4.252036 | 3.357667 | 2.313279 | 2.307315 | 2.248429 |
|  | 15 H | 4.402777 | 4.367866 | 3.356531 | 3.350813 | 2.706586 |
|  | 16 C | 5.332584 | 2.237559 | 1.425190 | 2.313324 | 1.079608 |
|  | 17 S | 4.341328 | 3.909953 | 3.693130 | 3.521340 | 4.891255 |
|  | 18 S | 4.342129 | 4.894329 | 4.268639 | 4.447962 | 3.914008 |
|  | 19 C | 4.905268 | 5.214439 | 4.974127 | 4.987422 | 5.559208 |
|  | 20 C | 4.905763 | 5.560455 | 5.168452 | 5.296424 | 5.215396 |
|  | 21 H | 5.584312 | 6.590164 | 6.209720 | 6.361002 | 6.058666 |
|  | 22 H | 5.583873 | 6.056864 | 5.915643 | 5.891998 | 6.588186 |
|  |      | 11       | 12       | 13       | 14       | 15       |
|  | 11 H | 0.000000 |          |          |          |          |
|  | 12 C | 2.238115 | 0.000000 |          |          |          |
|  | 13 H | 2.695654 | 1.080182 | 0.000000 |          |          |
|  | 14 C | 3.350789 | 1.427364 | 2.240340 | 0.000000 |          |
|  | 15 H | 4.360638 | 2.238060 | 2.695667 | 1.080049 | 0.000000 |
|  | 16 C | 3.356591 | 2.319510 | 3.363750 | 1.436319 | 2.247586 |
|  | 17 S | 3.605183 | 4.045324 | 4.499091 | 4.448842 | 5.192679 |
|  | 18 S | 5.191827 | 4.042387 | 4.494340 | 3.520029 | 3.602369 |
|  | 19 C | 5.244813 | 5.209633 | 5.606809 | 5.296443 | 5.788593 |
|  | 20 C | 5.789187 | 5.208681 | 5.605249 | 4.986676 | 5.242967 |
|  | 21 H | 6.863016 | 6.191625 | 6.531647 | 5.891067 | 6.017639 |
|  | 22 H | 6.019867 | 6.193138 | 6.534216 | 6.361216 | 6.862746 |
|  |      | 16       | 17       | 18       | 19       | 20       |
|  | 16 C | 0.000000 |          |          |          |          |
|  | 17 S | 4.266933 | 0.000000 |          |          |          |
|  | 18 S | 3.695354 | 3.204197 | 0.000000 |          |          |
|  | 19 C | 5.167862 | 1.733231 | 2.724469 | 0.000000 |          |
|  | 20 C | 4.974673 | 2.724373 | 1.733295 | 1.378901 | 0.000000 |
|  | 21 H | 5.916624 | 3.724595 | 2.425523 | 2.147756 | 1.083768 |
|  | 22 H | 6.208735 | 2.425472 | 3.724726 | 1.083762 | 2.147826 |
|  |      | 21       | 22       |          |          |          |
|  | 21 H | 0.000000 |          |          |          |          |
|  | 22 H | 2.493623 | 0.000000 |          |          |          |
|  |      | 1        | 2        | 3        | 4        | 5        |
|  | 1 Ir | 0.000000 |          |          |          |          |
|  | 2 Fe | 2.621746 | 0.000000 |          |          |          |

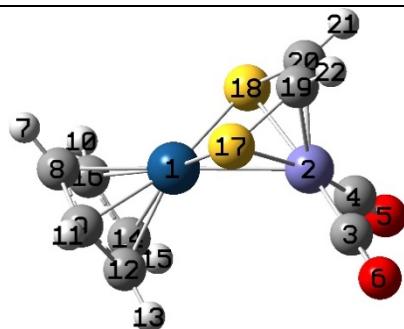

2. -2661.031538 +8.8

|    |   |          |          |          |          |          |  |  |  |
|----|---|----------|----------|----------|----------|----------|--|--|--|
| 3  | C | 3.822270 | 1.740619 | 0.000000 |          |          |  |  |  |
| 4  | C | 3.715173 | 1.738494 | 2.400855 | 0.000000 |          |  |  |  |
| 5  | O | 4.663422 | 2.889688 | 3.291926 | 1.151290 | 0.000000 |  |  |  |
| 6  | O | 4.810074 | 2.896023 | 1.155594 | 3.291935 | 3.959586 |  |  |  |
| 7  | H | 2.980768 | 5.538645 | 6.688692 | 6.631397 | 7.495872 |  |  |  |
| 8  | C | 2.223510 | 4.844740 | 5.919510 | 5.819503 | 6.643086 |  |  |  |
| 9  | C | 2.184401 | 4.528839 | 5.211696 | 5.581341 | 6.443899 |  |  |  |
| 10 | H | 2.923519 | 5.075001 | 6.457398 | 5.474111 | 6.015507 |  |  |  |
| 11 | H | 2.921097 | 5.004217 | 5.460514 | 6.232112 | 7.160952 |  |  |  |
| 12 | C | 2.172901 | 4.063489 | 4.597530 | 4.747037 | 5.461547 |  |  |  |
| 13 | H | 2.910663 | 4.194499 | 4.310781 | 4.761748 | 5.413397 |  |  |  |
| 14 | C | 2.173504 | 4.091555 | 5.004431 | 4.427441 | 4.984534 |  |  |  |
| 15 | H | 2.914092 | 4.249315 | 5.097661 | 4.143849 | 4.464491 |  |  |  |
| 16 | C | 2.187932 | 4.572276 | 5.784100 | 5.146427 | 5.794376 |  |  |  |
| 17 | S | 2.298055 | 2.321313 | 2.985264 | 4.040919 | 5.186242 |  |  |  |
| 18 | S | 2.306964 | 2.307999 | 4.046240 | 2.960700 | 3.801766 |  |  |  |
| 19 | C | 3.264368 | 2.092336 | 3.069322 | 3.641927 | 4.743707 |  |  |  |
| 20 | C | 3.273952 | 2.084616 | 3.557378 | 3.151517 | 4.126054 |  |  |  |
| 21 | H | 4.303697 | 2.893767 | 4.217014 | 3.555433 | 4.345221 |  |  |  |
| 22 | H | 4.291602 | 2.891434 | 3.410646 | 4.325520 | 5.376488 |  |  |  |
|    |   | 6        | 7        | 8        | 9        | 10       |  |  |  |
| 6  | O | 0.000000 |          |          |          |          |  |  |  |
| 7  | H | 7.586132 | 0.000000 |          |          |          |  |  |  |
| 8  | C | 6.793614 | 1.079263 | 0.000000 |          |          |  |  |  |
| 9  | C | 5.917500 | 2.247421 | 1.431544 | 0.000000 |          |  |  |  |
| 10 | H | 7.457574 | 2.699532 | 2.237897 | 3.345365 | 0.000000 |  |  |  |
| 11 | H | 6.039598 | 2.703219 | 2.240727 | 1.080505 | 4.356896 |  |  |  |
| 12 | C | 5.251389 | 3.369878 | 2.326821 | 1.429591 | 3.356347 |  |  |  |
| 13 | H | 4.753565 | 4.378856 | 3.369188 | 2.243267 | 4.367637 |  |  |  |
| 14 | C | 5.820190 | 3.369348 | 2.326247 | 2.312419 | 2.238410 |  |  |  |
| 15 | H | 5.874549 | 4.378400 | 3.368662 | 3.356461 | 2.697480 |  |  |  |
| 16 | C | 6.718973 | 2.244643 | 1.428838 | 2.300585 | 1.080534 |  |  |  |
| 17 | S | 3.836178 | 4.381471 | 3.969469 | 3.521519 | 5.122174 |  |  |  |
| 18 | S | 5.200858 | 4.496095 | 4.036557 | 4.446971 | 3.591104 |  |  |  |
| 19 | C | 4.026106 | 5.491780 | 5.163330 | 5.029562 | 5.756735 |  |  |  |
| 20 | C | 4.643167 | 5.541507 | 5.194413 | 5.347268 | 5.233419 |  |  |  |
| 21 | H | 5.234633 | 6.464390 | 6.169396 | 6.405575 | 5.985656 |  |  |  |
| 22 | H | 4.156273 | 6.395459 | 6.127640 | 5.910961 | 6.826440 |  |  |  |
|    |   | 11       | 12       | 13       | 14       | 15       |  |  |  |
| 11 | H | 0.000000 |          |          |          |          |  |  |  |
| 12 | C | 2.237202 | 0.000000 |          |          |          |  |  |  |
| 13 | H | 2.694775 | 1.079386 | 0.000000 |          |          |  |  |  |
| 14 | C | 3.355771 | 1.435737 | 2.248466 | 0.000000 |          |  |  |  |
| 15 | H | 4.366548 | 2.247915 | 2.708901 | 1.079406 | 0.000000 |  |  |  |
| 16 | C | 3.345204 | 2.312998 | 3.357391 | 1.430890 | 2.245340 |  |  |  |
| 17 | S | 3.575178 | 3.794701 | 4.079580 | 4.339373 | 5.003139 |  |  |  |
| 18 | S | 5.172083 | 4.295658 | 4.929388 | 3.726062 | 3.963187 |  |  |  |
| 19 | C | 5.243008 | 5.149514 | 5.468195 | 5.326795 | 5.783347 |  |  |  |
| 20 | C | 5.802814 | 5.323706 | 5.769472 | 5.125041 | 5.423269 |  |  |  |
| 21 | H | 6.878113 | 6.348732 | 6.785201 | 6.042957 | 6.240109 |  |  |  |

|  |      |          |          |          |          |          |
|--|------|----------|----------|----------|----------|----------|
|  | 22 H | 5.987979 | 6.074080 | 6.299209 | 6.358410 | 6.811679 |
|  |      | 16       | 17       | 18       | 19       | 20       |
|  | 16 C | 0.000000 |          |          |          |          |
|  | 17 S | 4.418235 | 0.000000 |          |          |          |
|  | 18 S | 3.532027 | 3.142134 | 0.000000 |          |          |
|  | 19 C | 5.319970 | 1.752032 | 2.714605 | 0.000000 |          |
|  | 20 C | 5.029607 | 2.722454 | 1.754540 | 1.373753 | 0.000000 |
|  | 21 H | 5.915671 | 3.742286 | 2.442284 | 2.165799 | 1.082754 |
|  | 22 H | 6.374833 | 2.434867 | 3.735543 | 1.082866 | 2.162873 |
|  |      | 21       | 22       |          |          |          |
|  | 21 H | 0.000000 |          |          |          |          |
|  | 22 H | 2.556513 | 0.000000 |          |          |          |

**Table S6A.** Energy rank for all of the  $\text{CpRhS}_2\text{C}_2\text{H}_2 \cdot \text{Cr}(\text{CO})_n$  optimized structures. PBE0/6-311G(d,p).

Rh-Cr

|     | name                               | E(a.u.)      | $\Delta E$<br>(kcal/mol) |
|-----|------------------------------------|--------------|--------------------------|
| 5-1 | 11-rh-Cr-CO-5-md2                  | -2787.754554 | 0.0                      |
| 5-2 | 12-ir-Cr-CO-5-md3-new-Rh-Cr-k-ok   | -2787.740342 | 8.92                     |
| 5-3 | 12-rh-Cr-CO-5-md3-freq-fneg2-fneg1 | -2787.72102  | 21.0                     |
| 5-4 | 10-rh-Cr-CO-5-md1                  | -2787.696236 | 36.6                     |
|     |                                    |              |                          |
|     | name                               |              |                          |
| 4-1 | 8-rh-Cr-CO-4-md2                   | -2674.508827 | 0.0                      |
| 4-2 | 7-rh-Cr-CO-4-md1                   | -2674.497551 | 7.1                      |
| 4-3 | 9-rh-Cr-CO-4-md3                   | -2674.485493 | 14.6                     |
|     |                                    |              |                          |
|     | name                               |              |                          |
| 3-1 | 6-rh-Cr-CO-3-md3                   | -2561.285037 | 0.0                      |
|     |                                    |              |                          |
|     | name                               |              |                          |
| 2-1 | 3-rh-Cr-CO-2-md3                   | -2448.001988 | 0.0                      |
| 2-2 | 2-rh-Cr-CO-2-md2                   | -2447.996221 | 3.6                      |

**Table S6B.** Distance table for the lowest-lying CpRhS<sub>2</sub>C<sub>2</sub>H<sub>2</sub>·Cr(CO)<sub>n</sub> structures after PBE0/6-311G(d,p) optimization.

CpRhS<sub>2</sub>C<sub>2</sub>H<sub>2</sub>·Cr(CO)<sub>5</sub>

|                                                                                                              |          |          |          |          |          |          |  |
|--------------------------------------------------------------------------------------------------------------|----------|----------|----------|----------|----------|----------|--|
| 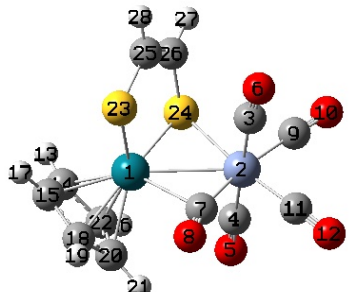 <p>1. -2787.754554 0.0</p> |          |          |          |          |          |          |  |
|                                                                                                              |          | 1        | 2        | 3        | 4        | 5        |  |
|                                                                                                              | 1 Rh     | 0.000000 |          |          |          |          |  |
|                                                                                                              | 2 Cr     | 2.822617 | 0.000000 |          |          |          |  |
|                                                                                                              | 3 C      | 3.632976 | 1.906854 | 0.000000 |          |          |  |
|                                                                                                              | 4 C      | 3.164044 | 1.879136 | 3.785906 | 0.000000 |          |  |
|                                                                                                              | 5 O      | 3.851967 | 3.023768 | 4.930477 | 1.144860 | 0.000000 |  |
|                                                                                                              | 6 O      | 4.509734 | 3.041889 | 1.138078 | 4.919998 | 6.063829 |  |
|                                                                                                              | 7 C      | 2.433958 | 1.907077 | 2.626572 | 2.762577 | 3.675412 |  |
|                                                                                                              | 8 O      | 3.139738 | 3.026416 | 3.459924 | 3.694698 | 4.449744 |  |
|                                                                                                              | 9 C      | 4.357967 | 1.894263 | 2.655156 | 2.682763 | 3.584976 |  |
|                                                                                                              | 10 O     | 5.403359 | 3.033941 | 3.540265 | 3.590035 | 4.310946 |  |
|                                                                                                              | 11 C     | 4.369261 | 1.841576 | 2.670309 | 2.612840 | 3.503426 |  |
|                                                                                                              | 12 O     | 5.417176 | 2.986337 | 3.571564 | 3.501584 | 4.193493 |  |
|                                                                                                              | 13 H     | 2.886886 | 5.348489 | 6.222778 | 5.082608 | 5.279675 |  |
|                                                                                                              | 14 C     | 2.161977 | 4.757322 | 5.735422 | 4.443118 | 4.653515 |  |
|                                                                                                              | 15 C     | 2.165222 | 4.946373 | 5.642454 | 4.948134 | 5.305131 |  |
|                                                                                                              | 16 H     | 2.955425 | 4.334623 | 5.903556 | 3.182086 | 2.908619 |  |
|                                                                                                              | 17 H     | 2.869472 | 5.639957 | 6.030828 | 5.883714 | 6.325587 |  |
|                                                                                                              | 18 C     | 2.211945 | 4.516677 | 5.392012 | 4.376499 | 4.686765 |  |
|                                                                                                              | 19 H     | 2.948246 | 4.923728 | 5.598212 | 4.959001 | 5.323506 |  |
|                                                                                                              | 20 C     | 2.244004 | 4.019559 | 5.347938 | 3.339073 | 3.412859 |  |
|                                                                                                              | 21 H     | 2.983926 | 4.011769 | 5.500781 | 3.064644 | 2.966678 |  |
|                                                                                                              | 22 C     | 2.218988 | 4.185927 | 5.563875 | 3.389699 | 3.380430 |  |
|                                                                                                              | 23 S     | 2.318168 | 3.792623 | 3.317616 | 4.992469 | 5.911934 |  |
|                                                                                                              | 24 S     | 2.291680 | 2.447048 | 3.146002 | 3.036719 | 3.846115 |  |
|                                                                                                              | 25 C     | 3.183730 | 3.915459 | 3.168733 | 5.260855 | 6.231816 |  |
|                                                                                                              | 26 C     | 3.203570 | 3.462131 | 3.113218 | 4.618002 | 5.536520 |  |
| 27 H                                                                                                         | 4.231323 | 4.167483 | 3.727165 | 5.274700 | 6.152321 |          |  |
| 28 H                                                                                                         | 4.220472 | 4.852960 | 3.792611 | 6.301875 | 7.295153 |          |  |
|                                                                                                              |          | 6        | 7        | 8        | 9        | 10       |  |
| 6 O                                                                                                          | 0.000000 |          |          |          |          |          |  |
| 7 C                                                                                                          | 3.526674 | 0.000000 |          |          |          |          |  |
| 8 O                                                                                                          | 4.154157 | 1.153689 | 0.000000 |          |          |          |  |
| 9 C                                                                                                          | 3.514027 | 3.779199 | 4.856976 | 0.000000 |          |          |  |
| 10 O                                                                                                         | 4.197499 | 4.911349 | 5.972772 | 1.139896 | 0.000000 |          |  |
| 11 C                                                                                                         | 3.531496 | 2.455737 | 3.118004 | 2.563540 | 3.441377 |          |  |
| 12 O                                                                                                         | 4.236501 | 3.296652 | 3.658464 | 3.452146 | 4.125244 |          |  |
| 13 H                                                                                                         | 7.017744 | 5.278960 | 5.872676 | 6.378165 | 7.188618 |          |  |
| 14 C                                                                                                         | 6.586264 | 4.425572 | 4.926295 | 6.023802 | 6.941012 |          |  |
| 15 C                                                                                                         | 6.375304 | 4.092847 | 4.300091 | 6.501513 | 7.524600 |          |  |
| 16 H                                                                                                         | 6.960781 | 4.474478 | 5.144150 | 5.265907 | 6.062307 |          |  |
| 17 H                                                                                                         | 6.608455 | 4.726562 | 4.841883 | 7.184748 | 8.197489 |          |  |
| 18 C                                                                                                         | 6.199972 | 3.295874 | 3.271695 | 6.252383 | 7.342170 |          |  |
| 19 H                                                                                                         | 6.304025 | 3.360732 | 2.965190 | 6.765694 | 7.890272 |          |  |

|  |    |   |          |          |          |          |          |
|--|----|---|----------|----------|----------|----------|----------|
|  | 20 | C | 6.327204 | 3.184831 | 3.428126 | 5.592775 | 6.628881 |
|  | 21 | H | 6.521470 | 3.133109 | 3.263806 | 5.554909 | 6.577006 |
|  | 22 | C | 6.563831 | 3.936109 | 4.479926 | 5.435785 | 6.357142 |
|  | 23 | S | 3.624900 | 3.313776 | 3.765662 | 5.143219 | 6.105274 |
|  | 24 | S | 4.009489 | 3.536313 | 4.615409 | 2.926175 | 3.701753 |
|  | 25 | C | 3.313312 | 4.242443 | 4.984480 | 4.646408 | 5.379909 |
|  | 26 | C | 3.505946 | 4.346502 | 5.304737 | 3.767629 | 4.373417 |
|  | 27 | H | 3.969489 | 5.298517 | 6.294851 | 3.995015 | 4.328439 |
|  | 28 | H | 3.616718 | 5.141825 | 5.791434 | 5.439533 | 6.067608 |
|  |    |   | 11       | 12       | 13       | 14       | 15       |
|  | 11 | C | 0.000000 |          |          |          |          |
|  | 12 | O | 1.144879 | 0.000000 |          |          |          |
|  | 13 | H | 7.012973 | 8.079907 | 0.000000 |          |          |
|  | 14 | C | 6.295584 | 7.314239 | 1.080006 | 0.000000 |          |
|  | 15 | C | 6.324805 | 7.275070 | 2.241407 | 1.428900 | 0.000000 |
|  | 16 | H | 5.620225 | 6.546451 | 2.710672 | 2.246765 | 3.354996 |
|  | 17 | H | 7.042612 | 7.994744 | 2.693067 | 2.237285 | 1.080433 |
|  | 18 | C | 5.563444 | 6.384307 | 3.356908 | 2.314014 | 1.424514 |
|  | 19 | H | 5.710023 | 6.405308 | 4.368501 | 3.358745 | 2.240860 |
|  | 20 | C | 5.011986 | 5.827346 | 3.348451 | 2.303940 | 2.300432 |
|  | 21 | H | 4.628162 | 5.290623 | 4.359660 | 3.348281 | 3.344587 |
|  | 22 | C | 5.515459 | 6.460096 | 2.248849 | 1.433638 | 2.310036 |
|  | 23 | S | 5.216693 | 6.209623 | 4.148332 | 3.777154 | 3.242371 |
|  | 24 | S | 4.272575 | 5.414068 | 3.649391 | 3.522046 | 4.154511 |
|  | 25 | C | 5.496255 | 6.549444 | 4.551018 | 4.510954 | 4.453384 |
|  | 26 | C | 5.167148 | 6.269782 | 4.382148 | 4.443745 | 4.782846 |
|  | 27 | H | 5.784474 | 6.853493 | 5.090054 | 5.302247 | 5.769605 |
|  | 28 | H | 6.315390 | 7.314056 | 5.388662 | 5.435367 | 5.284347 |
|  |    |   | 16       | 17       | 18       | 19       | 20       |
|  | 16 | H | 0.000000 |          |          |          |          |
|  | 17 | H | 4.365284 | 0.000000 |          |          |          |
|  | 18 | C | 3.355110 | 2.237366 | 0.000000 |          |          |
|  | 19 | H | 4.362913 | 2.700547 | 1.079911 | 0.000000 |          |
|  | 20 | C | 2.230012 | 3.345873 | 1.428703 | 2.242058 | 0.000000 |
|  | 21 | H | 2.681378 | 4.356872 | 2.238417 | 2.695743 | 1.080954 |
|  | 22 | C | 1.080197 | 3.353497 | 2.311837 | 3.353943 | 1.416649 |
|  | 23 | S | 5.186538 | 3.146852 | 3.637736 | 3.898311 | 4.332899 |
|  | 24 | S | 3.569033 | 4.715259 | 4.460973 | 5.230262 | 4.092380 |
|  | 25 | C | 5.651967 | 4.407212 | 5.032836 | 5.478880 | 5.420448 |
|  | 26 | C | 5.121492 | 4.978086 | 5.330357 | 5.953503 | 5.369397 |
|  | 27 | H | 5.831262 | 5.940556 | 6.374146 | 7.028226 | 6.335351 |
|  | 28 | H | 6.704157 | 5.061472 | 5.930896 | 6.290470 | 6.438032 |
|  |    |   | 21       | 22       | 23       | 24       | 25       |
|  | 21 | H | 0.000000 |          |          |          |          |
|  | 22 | C | 2.226968 | 0.000000 |          |          |          |
|  | 23 | S | 5.054996 | 4.410840 | 0.000000 |          |          |
|  | 24 | S | 4.616454 | 3.488895 | 3.188853 | 0.000000 |          |
|  | 25 | C | 6.126949 | 5.136115 | 1.725377 | 2.694122 | 0.000000 |
|  | 26 | C | 6.009136 | 4.853688 | 2.709834 | 1.750730 | 1.342451 |
|  | 27 | H | 6.951831 | 5.701497 | 3.722887 | 2.430471 | 2.139821 |

|                                                                                                                | 28 H 7.159920 6.169267 2.402163 3.707411 1.086894<br>26 27 28<br>26 C 0.000000<br>27 H 1.084157 0.000000<br>28 H 2.117459 2.497925 0.000000                                                                                                                                                                                                                                                                                                                                                                                                                                                                                                                                                                                                                                                                                                                                                                                                                                                                                                                                                                                                                                                                                                                                                                                                                                                                                                                                                                                                                                                                                                                                                                                                                                                                                                                                                                                                                                                                                                                                                                                                                                                                                                                                                                                                                                                                                                                                                                                                                                                                                                                                                                                                                                                                                                                                                                                                                                                                                                                                                                                                                                                                                                                                                                                                                                                                                                                                                                                                                                                                                                                                                                                                                                                                                                                                                                                                                                                                                                                                                                                                                                                                                                                                                                                                                                                                                                                                                                                                                                                                                                                                                                                                                                                                                                                                     |          |          |          |          |   |   |      |          |  |  |  |  |      |          |          |  |  |  |     |          |          |          |  |  |     |          |          |          |          |  |     |          |          |          |          |          |     |          |          |          |          |          |     |          |          |          |          |          |     |          |          |          |          |          |     |          |          |          |          |          |      |          |          |          |          |          |      |          |          |          |          |          |      |          |          |          |          |          |      |          |          |          |          |          |      |          |          |          |          |          |      |          |          |          |          |          |      |          |          |          |          |          |      |          |          |          |          |          |      |          |          |          |          |          |      |          |          |          |          |          |      |          |          |          |          |          |      |          |          |          |          |          |      |          |          |          |          |          |      |          |          |          |          |          |      |          |          |          |          |          |      |          |          |          |          |          |      |          |          |          |          |          |      |          |          |          |          |          |      |          |          |          |          |          |  |   |   |   |   |    |     |          |  |  |  |  |     |          |          |  |  |  |     |          |          |          |  |  |     |          |          |          |          |  |      |          |          |          |          |          |      |          |          |          |          |          |      |          |          |          |          |          |      |          |          |          |          |          |      |          |          |          |          |          |      |          |          |          |          |          |      |          |          |          |          |          |      |          |          |          |          |          |      |          |          |          |          |          |      |          |          |          |          |          |      |          |          |          |          |          |
|----------------------------------------------------------------------------------------------------------------|---------------------------------------------------------------------------------------------------------------------------------------------------------------------------------------------------------------------------------------------------------------------------------------------------------------------------------------------------------------------------------------------------------------------------------------------------------------------------------------------------------------------------------------------------------------------------------------------------------------------------------------------------------------------------------------------------------------------------------------------------------------------------------------------------------------------------------------------------------------------------------------------------------------------------------------------------------------------------------------------------------------------------------------------------------------------------------------------------------------------------------------------------------------------------------------------------------------------------------------------------------------------------------------------------------------------------------------------------------------------------------------------------------------------------------------------------------------------------------------------------------------------------------------------------------------------------------------------------------------------------------------------------------------------------------------------------------------------------------------------------------------------------------------------------------------------------------------------------------------------------------------------------------------------------------------------------------------------------------------------------------------------------------------------------------------------------------------------------------------------------------------------------------------------------------------------------------------------------------------------------------------------------------------------------------------------------------------------------------------------------------------------------------------------------------------------------------------------------------------------------------------------------------------------------------------------------------------------------------------------------------------------------------------------------------------------------------------------------------------------------------------------------------------------------------------------------------------------------------------------------------------------------------------------------------------------------------------------------------------------------------------------------------------------------------------------------------------------------------------------------------------------------------------------------------------------------------------------------------------------------------------------------------------------------------------------------------------------------------------------------------------------------------------------------------------------------------------------------------------------------------------------------------------------------------------------------------------------------------------------------------------------------------------------------------------------------------------------------------------------------------------------------------------------------------------------------------------------------------------------------------------------------------------------------------------------------------------------------------------------------------------------------------------------------------------------------------------------------------------------------------------------------------------------------------------------------------------------------------------------------------------------------------------------------------------------------------------------------------------------------------------------------------------------------------------------------------------------------------------------------------------------------------------------------------------------------------------------------------------------------------------------------------------------------------------------------------------------------------------------------------------------------------------------------------------------------------------------------------------------------------|----------|----------|----------|----------|---|---|------|----------|--|--|--|--|------|----------|----------|--|--|--|-----|----------|----------|----------|--|--|-----|----------|----------|----------|----------|--|-----|----------|----------|----------|----------|----------|-----|----------|----------|----------|----------|----------|-----|----------|----------|----------|----------|----------|-----|----------|----------|----------|----------|----------|-----|----------|----------|----------|----------|----------|------|----------|----------|----------|----------|----------|------|----------|----------|----------|----------|----------|------|----------|----------|----------|----------|----------|------|----------|----------|----------|----------|----------|------|----------|----------|----------|----------|----------|------|----------|----------|----------|----------|----------|------|----------|----------|----------|----------|----------|------|----------|----------|----------|----------|----------|------|----------|----------|----------|----------|----------|------|----------|----------|----------|----------|----------|------|----------|----------|----------|----------|----------|------|----------|----------|----------|----------|----------|------|----------|----------|----------|----------|----------|------|----------|----------|----------|----------|----------|------|----------|----------|----------|----------|----------|------|----------|----------|----------|----------|----------|------|----------|----------|----------|----------|----------|------|----------|----------|----------|----------|----------|------|----------|----------|----------|----------|----------|--|---|---|---|---|----|-----|----------|--|--|--|--|-----|----------|----------|--|--|--|-----|----------|----------|----------|--|--|-----|----------|----------|----------|----------|--|------|----------|----------|----------|----------|----------|------|----------|----------|----------|----------|----------|------|----------|----------|----------|----------|----------|------|----------|----------|----------|----------|----------|------|----------|----------|----------|----------|----------|------|----------|----------|----------|----------|----------|------|----------|----------|----------|----------|----------|------|----------|----------|----------|----------|----------|------|----------|----------|----------|----------|----------|------|----------|----------|----------|----------|----------|------|----------|----------|----------|----------|----------|
| 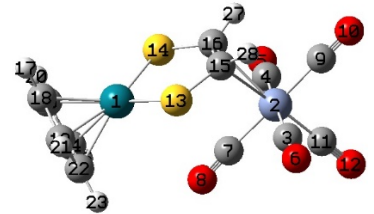 <p>2. -2787.740342 +8.92</p> | <table border="1"> <thead> <tr> <th></th> <th>1</th> <th>2</th> <th>3</th> <th>4</th> <th>5</th> </tr> </thead> <tbody> <tr><td>1 Rh</td><td>0.000000</td><td></td><td></td><td></td><td></td></tr> <tr><td>2 Cr</td><td>4.539282</td><td>0.000000</td><td></td><td></td><td></td></tr> <tr><td>3 C</td><td>4.967644</td><td>1.889796</td><td>0.000000</td><td></td><td></td></tr> <tr><td>4 C</td><td>4.967416</td><td>1.889796</td><td>3.775528</td><td>0.000000</td><td></td></tr> <tr><td>5 O</td><td>5.561888</td><td>3.031367</td><td>4.914039</td><td>1.142379</td><td>0.000000</td></tr> <tr><td>6 O</td><td>5.562196</td><td>3.031367</td><td>1.142379</td><td>4.914038</td><td>6.050212</td></tr> <tr><td>7 C</td><td>3.672025</td><td>1.890995</td><td>2.659972</td><td>2.659959</td><td>3.552719</td></tr> <tr><td>8 O</td><td>3.620168</td><td>3.032822</td><td>3.555821</td><td>3.555660</td><td>4.258194</td></tr> <tr><td>9 C</td><td>5.883253</td><td>1.887373</td><td>2.685282</td><td>2.685254</td><td>3.592559</td></tr> <tr><td>10 O</td><td>6.833575</td><td>3.030402</td><td>3.588265</td><td>3.588162</td><td>4.314379</td></tr> <tr><td>11 C</td><td>6.094647</td><td>1.833711</td><td>2.573154</td><td>2.573207</td><td>3.442903</td></tr> <tr><td>12 O</td><td>7.136044</td><td>2.981187</td><td>3.456923</td><td>3.457032</td><td>4.116075</td></tr> <tr><td>13 S</td><td>2.243681</td><td>3.648398</td><td>3.382979</td><td>4.822386</td><td>5.746305</td></tr> <tr><td>14 S</td><td>2.243678</td><td>3.648446</td><td>4.822524</td><td>3.382898</td><td>3.753965</td></tr> <tr><td>15 C</td><td>3.181467</td><td>2.501210</td><td>2.764426</td><td>3.583230</td><td>4.531273</td></tr> <tr><td>16 C</td><td>3.181463</td><td>2.501232</td><td>3.583218</td><td>2.764486</td><td>3.493427</td></tr> <tr><td>17 H</td><td>2.893061</td><td>7.324911</td><td>7.626453</td><td>7.626075</td><td>8.059732</td></tr> <tr><td>18 C</td><td>2.164199</td><td>6.702863</td><td>7.017743</td><td>7.017423</td><td>7.471218</td></tr> <tr><td>19 C</td><td>2.189390</td><td>6.416155</td><td>6.400238</td><td>7.051040</td><td>7.665134</td></tr> <tr><td>20 H</td><td>2.923491</td><td>6.816317</td><td>7.677736</td><td>6.514569</td><td>6.628548</td></tr> <tr><td>21 H</td><td>2.923428</td><td>6.816424</td><td>6.514989</td><td>7.677585</td><td>8.389691</td></tr> <tr><td>22 C</td><td>2.169471</td><td>5.864449</td><td>5.967902</td><td>6.406547</td><td>6.985202</td></tr> <tr><td>23 H</td><td>2.896270</td><td>5.796022</td><td>5.682723</td><td>6.516411</td><td>7.173176</td></tr> <tr><td>24 C</td><td>2.169472</td><td>5.864379</td><td>6.406631</td><td>5.967668</td><td>6.331728</td></tr> <tr><td>25 H</td><td>2.896283</td><td>5.795908</td><td>6.516375</td><td>5.682519</td><td>5.929066</td></tr> <tr><td>26 C</td><td>2.189414</td><td>6.416074</td><td>7.051210</td><td>6.399877</td><td>6.687238</td></tr> <tr><td>27 H</td><td>4.189546</td><td>2.833165</td><td>4.093199</td><td>2.705330</td><td>3.259768</td></tr> <tr><td>28 H</td><td>4.189545</td><td>2.833159</td><td>2.705130</td><td>4.093319</td><td>5.074232</td></tr> <tr> <th></th> <th>6</th> <th>7</th> <th>8</th> <th>9</th> <th>10</th> </tr> <tr><td>6 O</td><td>0.000000</td><td></td><td></td><td></td><td></td></tr> <tr><td>7 C</td><td>3.552719</td><td>0.000000</td><td></td><td></td><td></td></tr> <tr><td>8 O</td><td>4.258388</td><td>1.142949</td><td>0.000000</td><td></td><td></td></tr> <tr><td>9 C</td><td>3.592609</td><td>3.778229</td><td>4.920186</td><td>0.000000</td><td></td></tr> <tr><td>10 O</td><td>4.314537</td><td>4.921329</td><td>6.063143</td><td>1.143129</td><td>0.000000</td></tr> <tr><td>11 C</td><td>3.442843</td><td>2.654058</td><td>3.534816</td><td>2.633982</td><td>3.535040</td></tr> <tr><td>12 O</td><td>4.115932</td><td>3.555320</td><td>4.241128</td><td>3.530710</td><td>4.240556</td></tr> <tr><td>13 S</td><td>3.754096</td><td>3.455278</td><td>3.868272</td><td>4.649177</td><td>5.497724</td></tr> <tr><td>14 S</td><td>5.746464</td><td>3.455534</td><td>3.868502</td><td>4.649043</td><td>5.497485</td></tr> <tr><td>15 C</td><td>3.493356</td><td>3.170548</td><td>4.014460</td><td>3.072901</td><td>3.863797</td></tr> <tr><td>16 C</td><td>4.531249</td><td>3.170661</td><td>4.014548</td><td>3.072807</td><td>3.863646</td></tr> <tr><td>17 H</td><td>8.060288</td><td>6.561633</td><td>6.397628</td><td>8.423493</td><td>9.227175</td></tr> <tr><td>18 C</td><td>7.471679</td><td>5.735415</td><td>5.456598</td><td>7.982850</td><td>8.875759</td></tr> <tr><td>19 C</td><td>6.687725</td><td>5.292360</td><td>4.910192</td><td>7.819047</td><td>8.767628</td></tr> <tr><td>20 H</td><td>8.389943</td><td>5.810885</td><td>5.494140</td><td>8.121014</td><td>9.022444</td></tr> </tbody> </table> |          | 1        | 2        | 3        | 4 | 5 | 1 Rh | 0.000000 |  |  |  |  | 2 Cr | 4.539282 | 0.000000 |  |  |  | 3 C | 4.967644 | 1.889796 | 0.000000 |  |  | 4 C | 4.967416 | 1.889796 | 3.775528 | 0.000000 |  | 5 O | 5.561888 | 3.031367 | 4.914039 | 1.142379 | 0.000000 | 6 O | 5.562196 | 3.031367 | 1.142379 | 4.914038 | 6.050212 | 7 C | 3.672025 | 1.890995 | 2.659972 | 2.659959 | 3.552719 | 8 O | 3.620168 | 3.032822 | 3.555821 | 3.555660 | 4.258194 | 9 C | 5.883253 | 1.887373 | 2.685282 | 2.685254 | 3.592559 | 10 O | 6.833575 | 3.030402 | 3.588265 | 3.588162 | 4.314379 | 11 C | 6.094647 | 1.833711 | 2.573154 | 2.573207 | 3.442903 | 12 O | 7.136044 | 2.981187 | 3.456923 | 3.457032 | 4.116075 | 13 S | 2.243681 | 3.648398 | 3.382979 | 4.822386 | 5.746305 | 14 S | 2.243678 | 3.648446 | 4.822524 | 3.382898 | 3.753965 | 15 C | 3.181467 | 2.501210 | 2.764426 | 3.583230 | 4.531273 | 16 C | 3.181463 | 2.501232 | 3.583218 | 2.764486 | 3.493427 | 17 H | 2.893061 | 7.324911 | 7.626453 | 7.626075 | 8.059732 | 18 C | 2.164199 | 6.702863 | 7.017743 | 7.017423 | 7.471218 | 19 C | 2.189390 | 6.416155 | 6.400238 | 7.051040 | 7.665134 | 20 H | 2.923491 | 6.816317 | 7.677736 | 6.514569 | 6.628548 | 21 H | 2.923428 | 6.816424 | 6.514989 | 7.677585 | 8.389691 | 22 C | 2.169471 | 5.864449 | 5.967902 | 6.406547 | 6.985202 | 23 H | 2.896270 | 5.796022 | 5.682723 | 6.516411 | 7.173176 | 24 C | 2.169472 | 5.864379 | 6.406631 | 5.967668 | 6.331728 | 25 H | 2.896283 | 5.795908 | 6.516375 | 5.682519 | 5.929066 | 26 C | 2.189414 | 6.416074 | 7.051210 | 6.399877 | 6.687238 | 27 H | 4.189546 | 2.833165 | 4.093199 | 2.705330 | 3.259768 | 28 H | 4.189545 | 2.833159 | 2.705130 | 4.093319 | 5.074232 |  | 6 | 7 | 8 | 9 | 10 | 6 O | 0.000000 |  |  |  |  | 7 C | 3.552719 | 0.000000 |  |  |  | 8 O | 4.258388 | 1.142949 | 0.000000 |  |  | 9 C | 3.592609 | 3.778229 | 4.920186 | 0.000000 |  | 10 O | 4.314537 | 4.921329 | 6.063143 | 1.143129 | 0.000000 | 11 C | 3.442843 | 2.654058 | 3.534816 | 2.633982 | 3.535040 | 12 O | 4.115932 | 3.555320 | 4.241128 | 3.530710 | 4.240556 | 13 S | 3.754096 | 3.455278 | 3.868272 | 4.649177 | 5.497724 | 14 S | 5.746464 | 3.455534 | 3.868502 | 4.649043 | 5.497485 | 15 C | 3.493356 | 3.170548 | 4.014460 | 3.072901 | 3.863797 | 16 C | 4.531249 | 3.170661 | 4.014548 | 3.072807 | 3.863646 | 17 H | 8.060288 | 6.561633 | 6.397628 | 8.423493 | 9.227175 | 18 C | 7.471679 | 5.735415 | 5.456598 | 7.982850 | 8.875759 | 19 C | 6.687725 | 5.292360 | 4.910192 | 7.819047 | 8.767628 | 20 H | 8.389943 | 5.810885 | 5.494140 | 8.121014 | 9.022444 |
|                                                                                                                | 1                                                                                                                                                                                                                                                                                                                                                                                                                                                                                                                                                                                                                                                                                                                                                                                                                                                                                                                                                                                                                                                                                                                                                                                                                                                                                                                                                                                                                                                                                                                                                                                                                                                                                                                                                                                                                                                                                                                                                                                                                                                                                                                                                                                                                                                                                                                                                                                                                                                                                                                                                                                                                                                                                                                                                                                                                                                                                                                                                                                                                                                                                                                                                                                                                                                                                                                                                                                                                                                                                                                                                                                                                                                                                                                                                                                                                                                                                                                                                                                                                                                                                                                                                                                                                                                                                                                                                                                                                                                                                                                                                                                                                                                                                                                                                                                                                                                                               | 2        | 3        | 4        | 5        |   |   |      |          |  |  |  |  |      |          |          |  |  |  |     |          |          |          |  |  |     |          |          |          |          |  |     |          |          |          |          |          |     |          |          |          |          |          |     |          |          |          |          |          |     |          |          |          |          |          |     |          |          |          |          |          |      |          |          |          |          |          |      |          |          |          |          |          |      |          |          |          |          |          |      |          |          |          |          |          |      |          |          |          |          |          |      |          |          |          |          |          |      |          |          |          |          |          |      |          |          |          |          |          |      |          |          |          |          |          |      |          |          |          |          |          |      |          |          |          |          |          |      |          |          |          |          |          |      |          |          |          |          |          |      |          |          |          |          |          |      |          |          |          |          |          |      |          |          |          |          |          |      |          |          |          |          |          |      |          |          |          |          |          |      |          |          |          |          |          |  |   |   |   |   |    |     |          |  |  |  |  |     |          |          |  |  |  |     |          |          |          |  |  |     |          |          |          |          |  |      |          |          |          |          |          |      |          |          |          |          |          |      |          |          |          |          |          |      |          |          |          |          |          |      |          |          |          |          |          |      |          |          |          |          |          |      |          |          |          |          |          |      |          |          |          |          |          |      |          |          |          |          |          |      |          |          |          |          |          |      |          |          |          |          |          |
| 1 Rh                                                                                                           | 0.000000                                                                                                                                                                                                                                                                                                                                                                                                                                                                                                                                                                                                                                                                                                                                                                                                                                                                                                                                                                                                                                                                                                                                                                                                                                                                                                                                                                                                                                                                                                                                                                                                                                                                                                                                                                                                                                                                                                                                                                                                                                                                                                                                                                                                                                                                                                                                                                                                                                                                                                                                                                                                                                                                                                                                                                                                                                                                                                                                                                                                                                                                                                                                                                                                                                                                                                                                                                                                                                                                                                                                                                                                                                                                                                                                                                                                                                                                                                                                                                                                                                                                                                                                                                                                                                                                                                                                                                                                                                                                                                                                                                                                                                                                                                                                                                                                                                                                        |          |          |          |          |   |   |      |          |  |  |  |  |      |          |          |  |  |  |     |          |          |          |  |  |     |          |          |          |          |  |     |          |          |          |          |          |     |          |          |          |          |          |     |          |          |          |          |          |     |          |          |          |          |          |     |          |          |          |          |          |      |          |          |          |          |          |      |          |          |          |          |          |      |          |          |          |          |          |      |          |          |          |          |          |      |          |          |          |          |          |      |          |          |          |          |          |      |          |          |          |          |          |      |          |          |          |          |          |      |          |          |          |          |          |      |          |          |          |          |          |      |          |          |          |          |          |      |          |          |          |          |          |      |          |          |          |          |          |      |          |          |          |          |          |      |          |          |          |          |          |      |          |          |          |          |          |      |          |          |          |          |          |      |          |          |          |          |          |      |          |          |          |          |          |  |   |   |   |   |    |     |          |  |  |  |  |     |          |          |  |  |  |     |          |          |          |  |  |     |          |          |          |          |  |      |          |          |          |          |          |      |          |          |          |          |          |      |          |          |          |          |          |      |          |          |          |          |          |      |          |          |          |          |          |      |          |          |          |          |          |      |          |          |          |          |          |      |          |          |          |          |          |      |          |          |          |          |          |      |          |          |          |          |          |      |          |          |          |          |          |
| 2 Cr                                                                                                           | 4.539282                                                                                                                                                                                                                                                                                                                                                                                                                                                                                                                                                                                                                                                                                                                                                                                                                                                                                                                                                                                                                                                                                                                                                                                                                                                                                                                                                                                                                                                                                                                                                                                                                                                                                                                                                                                                                                                                                                                                                                                                                                                                                                                                                                                                                                                                                                                                                                                                                                                                                                                                                                                                                                                                                                                                                                                                                                                                                                                                                                                                                                                                                                                                                                                                                                                                                                                                                                                                                                                                                                                                                                                                                                                                                                                                                                                                                                                                                                                                                                                                                                                                                                                                                                                                                                                                                                                                                                                                                                                                                                                                                                                                                                                                                                                                                                                                                                                                        | 0.000000 |          |          |          |   |   |      |          |  |  |  |  |      |          |          |  |  |  |     |          |          |          |  |  |     |          |          |          |          |  |     |          |          |          |          |          |     |          |          |          |          |          |     |          |          |          |          |          |     |          |          |          |          |          |     |          |          |          |          |          |      |          |          |          |          |          |      |          |          |          |          |          |      |          |          |          |          |          |      |          |          |          |          |          |      |          |          |          |          |          |      |          |          |          |          |          |      |          |          |          |          |          |      |          |          |          |          |          |      |          |          |          |          |          |      |          |          |          |          |          |      |          |          |          |          |          |      |          |          |          |          |          |      |          |          |          |          |          |      |          |          |          |          |          |      |          |          |          |          |          |      |          |          |          |          |          |      |          |          |          |          |          |      |          |          |          |          |          |      |          |          |          |          |          |  |   |   |   |   |    |     |          |  |  |  |  |     |          |          |  |  |  |     |          |          |          |  |  |     |          |          |          |          |  |      |          |          |          |          |          |      |          |          |          |          |          |      |          |          |          |          |          |      |          |          |          |          |          |      |          |          |          |          |          |      |          |          |          |          |          |      |          |          |          |          |          |      |          |          |          |          |          |      |          |          |          |          |          |      |          |          |          |          |          |      |          |          |          |          |          |
| 3 C                                                                                                            | 4.967644                                                                                                                                                                                                                                                                                                                                                                                                                                                                                                                                                                                                                                                                                                                                                                                                                                                                                                                                                                                                                                                                                                                                                                                                                                                                                                                                                                                                                                                                                                                                                                                                                                                                                                                                                                                                                                                                                                                                                                                                                                                                                                                                                                                                                                                                                                                                                                                                                                                                                                                                                                                                                                                                                                                                                                                                                                                                                                                                                                                                                                                                                                                                                                                                                                                                                                                                                                                                                                                                                                                                                                                                                                                                                                                                                                                                                                                                                                                                                                                                                                                                                                                                                                                                                                                                                                                                                                                                                                                                                                                                                                                                                                                                                                                                                                                                                                                                        | 1.889796 | 0.000000 |          |          |   |   |      |          |  |  |  |  |      |          |          |  |  |  |     |          |          |          |  |  |     |          |          |          |          |  |     |          |          |          |          |          |     |          |          |          |          |          |     |          |          |          |          |          |     |          |          |          |          |          |     |          |          |          |          |          |      |          |          |          |          |          |      |          |          |          |          |          |      |          |          |          |          |          |      |          |          |          |          |          |      |          |          |          |          |          |      |          |          |          |          |          |      |          |          |          |          |          |      |          |          |          |          |          |      |          |          |          |          |          |      |          |          |          |          |          |      |          |          |          |          |          |      |          |          |          |          |          |      |          |          |          |          |          |      |          |          |          |          |          |      |          |          |          |          |          |      |          |          |          |          |          |      |          |          |          |          |          |      |          |          |          |          |          |      |          |          |          |          |          |  |   |   |   |   |    |     |          |  |  |  |  |     |          |          |  |  |  |     |          |          |          |  |  |     |          |          |          |          |  |      |          |          |          |          |          |      |          |          |          |          |          |      |          |          |          |          |          |      |          |          |          |          |          |      |          |          |          |          |          |      |          |          |          |          |          |      |          |          |          |          |          |      |          |          |          |          |          |      |          |          |          |          |          |      |          |          |          |          |          |      |          |          |          |          |          |
| 4 C                                                                                                            | 4.967416                                                                                                                                                                                                                                                                                                                                                                                                                                                                                                                                                                                                                                                                                                                                                                                                                                                                                                                                                                                                                                                                                                                                                                                                                                                                                                                                                                                                                                                                                                                                                                                                                                                                                                                                                                                                                                                                                                                                                                                                                                                                                                                                                                                                                                                                                                                                                                                                                                                                                                                                                                                                                                                                                                                                                                                                                                                                                                                                                                                                                                                                                                                                                                                                                                                                                                                                                                                                                                                                                                                                                                                                                                                                                                                                                                                                                                                                                                                                                                                                                                                                                                                                                                                                                                                                                                                                                                                                                                                                                                                                                                                                                                                                                                                                                                                                                                                                        | 1.889796 | 3.775528 | 0.000000 |          |   |   |      |          |  |  |  |  |      |          |          |  |  |  |     |          |          |          |  |  |     |          |          |          |          |  |     |          |          |          |          |          |     |          |          |          |          |          |     |          |          |          |          |          |     |          |          |          |          |          |     |          |          |          |          |          |      |          |          |          |          |          |      |          |          |          |          |          |      |          |          |          |          |          |      |          |          |          |          |          |      |          |          |          |          |          |      |          |          |          |          |          |      |          |          |          |          |          |      |          |          |          |          |          |      |          |          |          |          |          |      |          |          |          |          |          |      |          |          |          |          |          |      |          |          |          |          |          |      |          |          |          |          |          |      |          |          |          |          |          |      |          |          |          |          |          |      |          |          |          |          |          |      |          |          |          |          |          |      |          |          |          |          |          |      |          |          |          |          |          |  |   |   |   |   |    |     |          |  |  |  |  |     |          |          |  |  |  |     |          |          |          |  |  |     |          |          |          |          |  |      |          |          |          |          |          |      |          |          |          |          |          |      |          |          |          |          |          |      |          |          |          |          |          |      |          |          |          |          |          |      |          |          |          |          |          |      |          |          |          |          |          |      |          |          |          |          |          |      |          |          |          |          |          |      |          |          |          |          |          |      |          |          |          |          |          |
| 5 O                                                                                                            | 5.561888                                                                                                                                                                                                                                                                                                                                                                                                                                                                                                                                                                                                                                                                                                                                                                                                                                                                                                                                                                                                                                                                                                                                                                                                                                                                                                                                                                                                                                                                                                                                                                                                                                                                                                                                                                                                                                                                                                                                                                                                                                                                                                                                                                                                                                                                                                                                                                                                                                                                                                                                                                                                                                                                                                                                                                                                                                                                                                                                                                                                                                                                                                                                                                                                                                                                                                                                                                                                                                                                                                                                                                                                                                                                                                                                                                                                                                                                                                                                                                                                                                                                                                                                                                                                                                                                                                                                                                                                                                                                                                                                                                                                                                                                                                                                                                                                                                                                        | 3.031367 | 4.914039 | 1.142379 | 0.000000 |   |   |      |          |  |  |  |  |      |          |          |  |  |  |     |          |          |          |  |  |     |          |          |          |          |  |     |          |          |          |          |          |     |          |          |          |          |          |     |          |          |          |          |          |     |          |          |          |          |          |     |          |          |          |          |          |      |          |          |          |          |          |      |          |          |          |          |          |      |          |          |          |          |          |      |          |          |          |          |          |      |          |          |          |          |          |      |          |          |          |          |          |      |          |          |          |          |          |      |          |          |          |          |          |      |          |          |          |          |          |      |          |          |          |          |          |      |          |          |          |          |          |      |          |          |          |          |          |      |          |          |          |          |          |      |          |          |          |          |          |      |          |          |          |          |          |      |          |          |          |          |          |      |          |          |          |          |          |      |          |          |          |          |          |      |          |          |          |          |          |  |   |   |   |   |    |     |          |  |  |  |  |     |          |          |  |  |  |     |          |          |          |  |  |     |          |          |          |          |  |      |          |          |          |          |          |      |          |          |          |          |          |      |          |          |          |          |          |      |          |          |          |          |          |      |          |          |          |          |          |      |          |          |          |          |          |      |          |          |          |          |          |      |          |          |          |          |          |      |          |          |          |          |          |      |          |          |          |          |          |      |          |          |          |          |          |
| 6 O                                                                                                            | 5.562196                                                                                                                                                                                                                                                                                                                                                                                                                                                                                                                                                                                                                                                                                                                                                                                                                                                                                                                                                                                                                                                                                                                                                                                                                                                                                                                                                                                                                                                                                                                                                                                                                                                                                                                                                                                                                                                                                                                                                                                                                                                                                                                                                                                                                                                                                                                                                                                                                                                                                                                                                                                                                                                                                                                                                                                                                                                                                                                                                                                                                                                                                                                                                                                                                                                                                                                                                                                                                                                                                                                                                                                                                                                                                                                                                                                                                                                                                                                                                                                                                                                                                                                                                                                                                                                                                                                                                                                                                                                                                                                                                                                                                                                                                                                                                                                                                                                                        | 3.031367 | 1.142379 | 4.914038 | 6.050212 |   |   |      |          |  |  |  |  |      |          |          |  |  |  |     |          |          |          |  |  |     |          |          |          |          |  |     |          |          |          |          |          |     |          |          |          |          |          |     |          |          |          |          |          |     |          |          |          |          |          |     |          |          |          |          |          |      |          |          |          |          |          |      |          |          |          |          |          |      |          |          |          |          |          |      |          |          |          |          |          |      |          |          |          |          |          |      |          |          |          |          |          |      |          |          |          |          |          |      |          |          |          |          |          |      |          |          |          |          |          |      |          |          |          |          |          |      |          |          |          |          |          |      |          |          |          |          |          |      |          |          |          |          |          |      |          |          |          |          |          |      |          |          |          |          |          |      |          |          |          |          |          |      |          |          |          |          |          |      |          |          |          |          |          |      |          |          |          |          |          |  |   |   |   |   |    |     |          |  |  |  |  |     |          |          |  |  |  |     |          |          |          |  |  |     |          |          |          |          |  |      |          |          |          |          |          |      |          |          |          |          |          |      |          |          |          |          |          |      |          |          |          |          |          |      |          |          |          |          |          |      |          |          |          |          |          |      |          |          |          |          |          |      |          |          |          |          |          |      |          |          |          |          |          |      |          |          |          |          |          |      |          |          |          |          |          |
| 7 C                                                                                                            | 3.672025                                                                                                                                                                                                                                                                                                                                                                                                                                                                                                                                                                                                                                                                                                                                                                                                                                                                                                                                                                                                                                                                                                                                                                                                                                                                                                                                                                                                                                                                                                                                                                                                                                                                                                                                                                                                                                                                                                                                                                                                                                                                                                                                                                                                                                                                                                                                                                                                                                                                                                                                                                                                                                                                                                                                                                                                                                                                                                                                                                                                                                                                                                                                                                                                                                                                                                                                                                                                                                                                                                                                                                                                                                                                                                                                                                                                                                                                                                                                                                                                                                                                                                                                                                                                                                                                                                                                                                                                                                                                                                                                                                                                                                                                                                                                                                                                                                                                        | 1.890995 | 2.659972 | 2.659959 | 3.552719 |   |   |      |          |  |  |  |  |      |          |          |  |  |  |     |          |          |          |  |  |     |          |          |          |          |  |     |          |          |          |          |          |     |          |          |          |          |          |     |          |          |          |          |          |     |          |          |          |          |          |     |          |          |          |          |          |      |          |          |          |          |          |      |          |          |          |          |          |      |          |          |          |          |          |      |          |          |          |          |          |      |          |          |          |          |          |      |          |          |          |          |          |      |          |          |          |          |          |      |          |          |          |          |          |      |          |          |          |          |          |      |          |          |          |          |          |      |          |          |          |          |          |      |          |          |          |          |          |      |          |          |          |          |          |      |          |          |          |          |          |      |          |          |          |          |          |      |          |          |          |          |          |      |          |          |          |          |          |      |          |          |          |          |          |      |          |          |          |          |          |  |   |   |   |   |    |     |          |  |  |  |  |     |          |          |  |  |  |     |          |          |          |  |  |     |          |          |          |          |  |      |          |          |          |          |          |      |          |          |          |          |          |      |          |          |          |          |          |      |          |          |          |          |          |      |          |          |          |          |          |      |          |          |          |          |          |      |          |          |          |          |          |      |          |          |          |          |          |      |          |          |          |          |          |      |          |          |          |          |          |      |          |          |          |          |          |
| 8 O                                                                                                            | 3.620168                                                                                                                                                                                                                                                                                                                                                                                                                                                                                                                                                                                                                                                                                                                                                                                                                                                                                                                                                                                                                                                                                                                                                                                                                                                                                                                                                                                                                                                                                                                                                                                                                                                                                                                                                                                                                                                                                                                                                                                                                                                                                                                                                                                                                                                                                                                                                                                                                                                                                                                                                                                                                                                                                                                                                                                                                                                                                                                                                                                                                                                                                                                                                                                                                                                                                                                                                                                                                                                                                                                                                                                                                                                                                                                                                                                                                                                                                                                                                                                                                                                                                                                                                                                                                                                                                                                                                                                                                                                                                                                                                                                                                                                                                                                                                                                                                                                                        | 3.032822 | 3.555821 | 3.555660 | 4.258194 |   |   |      |          |  |  |  |  |      |          |          |  |  |  |     |          |          |          |  |  |     |          |          |          |          |  |     |          |          |          |          |          |     |          |          |          |          |          |     |          |          |          |          |          |     |          |          |          |          |          |     |          |          |          |          |          |      |          |          |          |          |          |      |          |          |          |          |          |      |          |          |          |          |          |      |          |          |          |          |          |      |          |          |          |          |          |      |          |          |          |          |          |      |          |          |          |          |          |      |          |          |          |          |          |      |          |          |          |          |          |      |          |          |          |          |          |      |          |          |          |          |          |      |          |          |          |          |          |      |          |          |          |          |          |      |          |          |          |          |          |      |          |          |          |          |          |      |          |          |          |          |          |      |          |          |          |          |          |      |          |          |          |          |          |      |          |          |          |          |          |  |   |   |   |   |    |     |          |  |  |  |  |     |          |          |  |  |  |     |          |          |          |  |  |     |          |          |          |          |  |      |          |          |          |          |          |      |          |          |          |          |          |      |          |          |          |          |          |      |          |          |          |          |          |      |          |          |          |          |          |      |          |          |          |          |          |      |          |          |          |          |          |      |          |          |          |          |          |      |          |          |          |          |          |      |          |          |          |          |          |      |          |          |          |          |          |
| 9 C                                                                                                            | 5.883253                                                                                                                                                                                                                                                                                                                                                                                                                                                                                                                                                                                                                                                                                                                                                                                                                                                                                                                                                                                                                                                                                                                                                                                                                                                                                                                                                                                                                                                                                                                                                                                                                                                                                                                                                                                                                                                                                                                                                                                                                                                                                                                                                                                                                                                                                                                                                                                                                                                                                                                                                                                                                                                                                                                                                                                                                                                                                                                                                                                                                                                                                                                                                                                                                                                                                                                                                                                                                                                                                                                                                                                                                                                                                                                                                                                                                                                                                                                                                                                                                                                                                                                                                                                                                                                                                                                                                                                                                                                                                                                                                                                                                                                                                                                                                                                                                                                                        | 1.887373 | 2.685282 | 2.685254 | 3.592559 |   |   |      |          |  |  |  |  |      |          |          |  |  |  |     |          |          |          |  |  |     |          |          |          |          |  |     |          |          |          |          |          |     |          |          |          |          |          |     |          |          |          |          |          |     |          |          |          |          |          |     |          |          |          |          |          |      |          |          |          |          |          |      |          |          |          |          |          |      |          |          |          |          |          |      |          |          |          |          |          |      |          |          |          |          |          |      |          |          |          |          |          |      |          |          |          |          |          |      |          |          |          |          |          |      |          |          |          |          |          |      |          |          |          |          |          |      |          |          |          |          |          |      |          |          |          |          |          |      |          |          |          |          |          |      |          |          |          |          |          |      |          |          |          |          |          |      |          |          |          |          |          |      |          |          |          |          |          |      |          |          |          |          |          |      |          |          |          |          |          |  |   |   |   |   |    |     |          |  |  |  |  |     |          |          |  |  |  |     |          |          |          |  |  |     |          |          |          |          |  |      |          |          |          |          |          |      |          |          |          |          |          |      |          |          |          |          |          |      |          |          |          |          |          |      |          |          |          |          |          |      |          |          |          |          |          |      |          |          |          |          |          |      |          |          |          |          |          |      |          |          |          |          |          |      |          |          |          |          |          |      |          |          |          |          |          |
| 10 O                                                                                                           | 6.833575                                                                                                                                                                                                                                                                                                                                                                                                                                                                                                                                                                                                                                                                                                                                                                                                                                                                                                                                                                                                                                                                                                                                                                                                                                                                                                                                                                                                                                                                                                                                                                                                                                                                                                                                                                                                                                                                                                                                                                                                                                                                                                                                                                                                                                                                                                                                                                                                                                                                                                                                                                                                                                                                                                                                                                                                                                                                                                                                                                                                                                                                                                                                                                                                                                                                                                                                                                                                                                                                                                                                                                                                                                                                                                                                                                                                                                                                                                                                                                                                                                                                                                                                                                                                                                                                                                                                                                                                                                                                                                                                                                                                                                                                                                                                                                                                                                                                        | 3.030402 | 3.588265 | 3.588162 | 4.314379 |   |   |      |          |  |  |  |  |      |          |          |  |  |  |     |          |          |          |  |  |     |          |          |          |          |  |     |          |          |          |          |          |     |          |          |          |          |          |     |          |          |          |          |          |     |          |          |          |          |          |     |          |          |          |          |          |      |          |          |          |          |          |      |          |          |          |          |          |      |          |          |          |          |          |      |          |          |          |          |          |      |          |          |          |          |          |      |          |          |          |          |          |      |          |          |          |          |          |      |          |          |          |          |          |      |          |          |          |          |          |      |          |          |          |          |          |      |          |          |          |          |          |      |          |          |          |          |          |      |          |          |          |          |          |      |          |          |          |          |          |      |          |          |          |          |          |      |          |          |          |          |          |      |          |          |          |          |          |      |          |          |          |          |          |      |          |          |          |          |          |  |   |   |   |   |    |     |          |  |  |  |  |     |          |          |  |  |  |     |          |          |          |  |  |     |          |          |          |          |  |      |          |          |          |          |          |      |          |          |          |          |          |      |          |          |          |          |          |      |          |          |          |          |          |      |          |          |          |          |          |      |          |          |          |          |          |      |          |          |          |          |          |      |          |          |          |          |          |      |          |          |          |          |          |      |          |          |          |          |          |      |          |          |          |          |          |
| 11 C                                                                                                           | 6.094647                                                                                                                                                                                                                                                                                                                                                                                                                                                                                                                                                                                                                                                                                                                                                                                                                                                                                                                                                                                                                                                                                                                                                                                                                                                                                                                                                                                                                                                                                                                                                                                                                                                                                                                                                                                                                                                                                                                                                                                                                                                                                                                                                                                                                                                                                                                                                                                                                                                                                                                                                                                                                                                                                                                                                                                                                                                                                                                                                                                                                                                                                                                                                                                                                                                                                                                                                                                                                                                                                                                                                                                                                                                                                                                                                                                                                                                                                                                                                                                                                                                                                                                                                                                                                                                                                                                                                                                                                                                                                                                                                                                                                                                                                                                                                                                                                                                                        | 1.833711 | 2.573154 | 2.573207 | 3.442903 |   |   |      |          |  |  |  |  |      |          |          |  |  |  |     |          |          |          |  |  |     |          |          |          |          |  |     |          |          |          |          |          |     |          |          |          |          |          |     |          |          |          |          |          |     |          |          |          |          |          |     |          |          |          |          |          |      |          |          |          |          |          |      |          |          |          |          |          |      |          |          |          |          |          |      |          |          |          |          |          |      |          |          |          |          |          |      |          |          |          |          |          |      |          |          |          |          |          |      |          |          |          |          |          |      |          |          |          |          |          |      |          |          |          |          |          |      |          |          |          |          |          |      |          |          |          |          |          |      |          |          |          |          |          |      |          |          |          |          |          |      |          |          |          |          |          |      |          |          |          |          |          |      |          |          |          |          |          |      |          |          |          |          |          |      |          |          |          |          |          |  |   |   |   |   |    |     |          |  |  |  |  |     |          |          |  |  |  |     |          |          |          |  |  |     |          |          |          |          |  |      |          |          |          |          |          |      |          |          |          |          |          |      |          |          |          |          |          |      |          |          |          |          |          |      |          |          |          |          |          |      |          |          |          |          |          |      |          |          |          |          |          |      |          |          |          |          |          |      |          |          |          |          |          |      |          |          |          |          |          |      |          |          |          |          |          |
| 12 O                                                                                                           | 7.136044                                                                                                                                                                                                                                                                                                                                                                                                                                                                                                                                                                                                                                                                                                                                                                                                                                                                                                                                                                                                                                                                                                                                                                                                                                                                                                                                                                                                                                                                                                                                                                                                                                                                                                                                                                                                                                                                                                                                                                                                                                                                                                                                                                                                                                                                                                                                                                                                                                                                                                                                                                                                                                                                                                                                                                                                                                                                                                                                                                                                                                                                                                                                                                                                                                                                                                                                                                                                                                                                                                                                                                                                                                                                                                                                                                                                                                                                                                                                                                                                                                                                                                                                                                                                                                                                                                                                                                                                                                                                                                                                                                                                                                                                                                                                                                                                                                                                        | 2.981187 | 3.456923 | 3.457032 | 4.116075 |   |   |      |          |  |  |  |  |      |          |          |  |  |  |     |          |          |          |  |  |     |          |          |          |          |  |     |          |          |          |          |          |     |          |          |          |          |          |     |          |          |          |          |          |     |          |          |          |          |          |     |          |          |          |          |          |      |          |          |          |          |          |      |          |          |          |          |          |      |          |          |          |          |          |      |          |          |          |          |          |      |          |          |          |          |          |      |          |          |          |          |          |      |          |          |          |          |          |      |          |          |          |          |          |      |          |          |          |          |          |      |          |          |          |          |          |      |          |          |          |          |          |      |          |          |          |          |          |      |          |          |          |          |          |      |          |          |          |          |          |      |          |          |          |          |          |      |          |          |          |          |          |      |          |          |          |          |          |      |          |          |          |          |          |      |          |          |          |          |          |  |   |   |   |   |    |     |          |  |  |  |  |     |          |          |  |  |  |     |          |          |          |  |  |     |          |          |          |          |  |      |          |          |          |          |          |      |          |          |          |          |          |      |          |          |          |          |          |      |          |          |          |          |          |      |          |          |          |          |          |      |          |          |          |          |          |      |          |          |          |          |          |      |          |          |          |          |          |      |          |          |          |          |          |      |          |          |          |          |          |      |          |          |          |          |          |
| 13 S                                                                                                           | 2.243681                                                                                                                                                                                                                                                                                                                                                                                                                                                                                                                                                                                                                                                                                                                                                                                                                                                                                                                                                                                                                                                                                                                                                                                                                                                                                                                                                                                                                                                                                                                                                                                                                                                                                                                                                                                                                                                                                                                                                                                                                                                                                                                                                                                                                                                                                                                                                                                                                                                                                                                                                                                                                                                                                                                                                                                                                                                                                                                                                                                                                                                                                                                                                                                                                                                                                                                                                                                                                                                                                                                                                                                                                                                                                                                                                                                                                                                                                                                                                                                                                                                                                                                                                                                                                                                                                                                                                                                                                                                                                                                                                                                                                                                                                                                                                                                                                                                                        | 3.648398 | 3.382979 | 4.822386 | 5.746305 |   |   |      |          |  |  |  |  |      |          |          |  |  |  |     |          |          |          |  |  |     |          |          |          |          |  |     |          |          |          |          |          |     |          |          |          |          |          |     |          |          |          |          |          |     |          |          |          |          |          |     |          |          |          |          |          |      |          |          |          |          |          |      |          |          |          |          |          |      |          |          |          |          |          |      |          |          |          |          |          |      |          |          |          |          |          |      |          |          |          |          |          |      |          |          |          |          |          |      |          |          |          |          |          |      |          |          |          |          |          |      |          |          |          |          |          |      |          |          |          |          |          |      |          |          |          |          |          |      |          |          |          |          |          |      |          |          |          |          |          |      |          |          |          |          |          |      |          |          |          |          |          |      |          |          |          |          |          |      |          |          |          |          |          |      |          |          |          |          |          |  |   |   |   |   |    |     |          |  |  |  |  |     |          |          |  |  |  |     |          |          |          |  |  |     |          |          |          |          |  |      |          |          |          |          |          |      |          |          |          |          |          |      |          |          |          |          |          |      |          |          |          |          |          |      |          |          |          |          |          |      |          |          |          |          |          |      |          |          |          |          |          |      |          |          |          |          |          |      |          |          |          |          |          |      |          |          |          |          |          |      |          |          |          |          |          |
| 14 S                                                                                                           | 2.243678                                                                                                                                                                                                                                                                                                                                                                                                                                                                                                                                                                                                                                                                                                                                                                                                                                                                                                                                                                                                                                                                                                                                                                                                                                                                                                                                                                                                                                                                                                                                                                                                                                                                                                                                                                                                                                                                                                                                                                                                                                                                                                                                                                                                                                                                                                                                                                                                                                                                                                                                                                                                                                                                                                                                                                                                                                                                                                                                                                                                                                                                                                                                                                                                                                                                                                                                                                                                                                                                                                                                                                                                                                                                                                                                                                                                                                                                                                                                                                                                                                                                                                                                                                                                                                                                                                                                                                                                                                                                                                                                                                                                                                                                                                                                                                                                                                                                        | 3.648446 | 4.822524 | 3.382898 | 3.753965 |   |   |      |          |  |  |  |  |      |          |          |  |  |  |     |          |          |          |  |  |     |          |          |          |          |  |     |          |          |          |          |          |     |          |          |          |          |          |     |          |          |          |          |          |     |          |          |          |          |          |     |          |          |          |          |          |      |          |          |          |          |          |      |          |          |          |          |          |      |          |          |          |          |          |      |          |          |          |          |          |      |          |          |          |          |          |      |          |          |          |          |          |      |          |          |          |          |          |      |          |          |          |          |          |      |          |          |          |          |          |      |          |          |          |          |          |      |          |          |          |          |          |      |          |          |          |          |          |      |          |          |          |          |          |      |          |          |          |          |          |      |          |          |          |          |          |      |          |          |          |          |          |      |          |          |          |          |          |      |          |          |          |          |          |      |          |          |          |          |          |  |   |   |   |   |    |     |          |  |  |  |  |     |          |          |  |  |  |     |          |          |          |  |  |     |          |          |          |          |  |      |          |          |          |          |          |      |          |          |          |          |          |      |          |          |          |          |          |      |          |          |          |          |          |      |          |          |          |          |          |      |          |          |          |          |          |      |          |          |          |          |          |      |          |          |          |          |          |      |          |          |          |          |          |      |          |          |          |          |          |      |          |          |          |          |          |
| 15 C                                                                                                           | 3.181467                                                                                                                                                                                                                                                                                                                                                                                                                                                                                                                                                                                                                                                                                                                                                                                                                                                                                                                                                                                                                                                                                                                                                                                                                                                                                                                                                                                                                                                                                                                                                                                                                                                                                                                                                                                                                                                                                                                                                                                                                                                                                                                                                                                                                                                                                                                                                                                                                                                                                                                                                                                                                                                                                                                                                                                                                                                                                                                                                                                                                                                                                                                                                                                                                                                                                                                                                                                                                                                                                                                                                                                                                                                                                                                                                                                                                                                                                                                                                                                                                                                                                                                                                                                                                                                                                                                                                                                                                                                                                                                                                                                                                                                                                                                                                                                                                                                                        | 2.501210 | 2.764426 | 3.583230 | 4.531273 |   |   |      |          |  |  |  |  |      |          |          |  |  |  |     |          |          |          |  |  |     |          |          |          |          |  |     |          |          |          |          |          |     |          |          |          |          |          |     |          |          |          |          |          |     |          |          |          |          |          |     |          |          |          |          |          |      |          |          |          |          |          |      |          |          |          |          |          |      |          |          |          |          |          |      |          |          |          |          |          |      |          |          |          |          |          |      |          |          |          |          |          |      |          |          |          |          |          |      |          |          |          |          |          |      |          |          |          |          |          |      |          |          |          |          |          |      |          |          |          |          |          |      |          |          |          |          |          |      |          |          |          |          |          |      |          |          |          |          |          |      |          |          |          |          |          |      |          |          |          |          |          |      |          |          |          |          |          |      |          |          |          |          |          |      |          |          |          |          |          |  |   |   |   |   |    |     |          |  |  |  |  |     |          |          |  |  |  |     |          |          |          |  |  |     |          |          |          |          |  |      |          |          |          |          |          |      |          |          |          |          |          |      |          |          |          |          |          |      |          |          |          |          |          |      |          |          |          |          |          |      |          |          |          |          |          |      |          |          |          |          |          |      |          |          |          |          |          |      |          |          |          |          |          |      |          |          |          |          |          |      |          |          |          |          |          |
| 16 C                                                                                                           | 3.181463                                                                                                                                                                                                                                                                                                                                                                                                                                                                                                                                                                                                                                                                                                                                                                                                                                                                                                                                                                                                                                                                                                                                                                                                                                                                                                                                                                                                                                                                                                                                                                                                                                                                                                                                                                                                                                                                                                                                                                                                                                                                                                                                                                                                                                                                                                                                                                                                                                                                                                                                                                                                                                                                                                                                                                                                                                                                                                                                                                                                                                                                                                                                                                                                                                                                                                                                                                                                                                                                                                                                                                                                                                                                                                                                                                                                                                                                                                                                                                                                                                                                                                                                                                                                                                                                                                                                                                                                                                                                                                                                                                                                                                                                                                                                                                                                                                                                        | 2.501232 | 3.583218 | 2.764486 | 3.493427 |   |   |      |          |  |  |  |  |      |          |          |  |  |  |     |          |          |          |  |  |     |          |          |          |          |  |     |          |          |          |          |          |     |          |          |          |          |          |     |          |          |          |          |          |     |          |          |          |          |          |     |          |          |          |          |          |      |          |          |          |          |          |      |          |          |          |          |          |      |          |          |          |          |          |      |          |          |          |          |          |      |          |          |          |          |          |      |          |          |          |          |          |      |          |          |          |          |          |      |          |          |          |          |          |      |          |          |          |          |          |      |          |          |          |          |          |      |          |          |          |          |          |      |          |          |          |          |          |      |          |          |          |          |          |      |          |          |          |          |          |      |          |          |          |          |          |      |          |          |          |          |          |      |          |          |          |          |          |      |          |          |          |          |          |      |          |          |          |          |          |  |   |   |   |   |    |     |          |  |  |  |  |     |          |          |  |  |  |     |          |          |          |  |  |     |          |          |          |          |  |      |          |          |          |          |          |      |          |          |          |          |          |      |          |          |          |          |          |      |          |          |          |          |          |      |          |          |          |          |          |      |          |          |          |          |          |      |          |          |          |          |          |      |          |          |          |          |          |      |          |          |          |          |          |      |          |          |          |          |          |      |          |          |          |          |          |
| 17 H                                                                                                           | 2.893061                                                                                                                                                                                                                                                                                                                                                                                                                                                                                                                                                                                                                                                                                                                                                                                                                                                                                                                                                                                                                                                                                                                                                                                                                                                                                                                                                                                                                                                                                                                                                                                                                                                                                                                                                                                                                                                                                                                                                                                                                                                                                                                                                                                                                                                                                                                                                                                                                                                                                                                                                                                                                                                                                                                                                                                                                                                                                                                                                                                                                                                                                                                                                                                                                                                                                                                                                                                                                                                                                                                                                                                                                                                                                                                                                                                                                                                                                                                                                                                                                                                                                                                                                                                                                                                                                                                                                                                                                                                                                                                                                                                                                                                                                                                                                                                                                                                                        | 7.324911 | 7.626453 | 7.626075 | 8.059732 |   |   |      |          |  |  |  |  |      |          |          |  |  |  |     |          |          |          |  |  |     |          |          |          |          |  |     |          |          |          |          |          |     |          |          |          |          |          |     |          |          |          |          |          |     |          |          |          |          |          |     |          |          |          |          |          |      |          |          |          |          |          |      |          |          |          |          |          |      |          |          |          |          |          |      |          |          |          |          |          |      |          |          |          |          |          |      |          |          |          |          |          |      |          |          |          |          |          |      |          |          |          |          |          |      |          |          |          |          |          |      |          |          |          |          |          |      |          |          |          |          |          |      |          |          |          |          |          |      |          |          |          |          |          |      |          |          |          |          |          |      |          |          |          |          |          |      |          |          |          |          |          |      |          |          |          |          |          |      |          |          |          |          |          |      |          |          |          |          |          |  |   |   |   |   |    |     |          |  |  |  |  |     |          |          |  |  |  |     |          |          |          |  |  |     |          |          |          |          |  |      |          |          |          |          |          |      |          |          |          |          |          |      |          |          |          |          |          |      |          |          |          |          |          |      |          |          |          |          |          |      |          |          |          |          |          |      |          |          |          |          |          |      |          |          |          |          |          |      |          |          |          |          |          |      |          |          |          |          |          |      |          |          |          |          |          |
| 18 C                                                                                                           | 2.164199                                                                                                                                                                                                                                                                                                                                                                                                                                                                                                                                                                                                                                                                                                                                                                                                                                                                                                                                                                                                                                                                                                                                                                                                                                                                                                                                                                                                                                                                                                                                                                                                                                                                                                                                                                                                                                                                                                                                                                                                                                                                                                                                                                                                                                                                                                                                                                                                                                                                                                                                                                                                                                                                                                                                                                                                                                                                                                                                                                                                                                                                                                                                                                                                                                                                                                                                                                                                                                                                                                                                                                                                                                                                                                                                                                                                                                                                                                                                                                                                                                                                                                                                                                                                                                                                                                                                                                                                                                                                                                                                                                                                                                                                                                                                                                                                                                                                        | 6.702863 | 7.017743 | 7.017423 | 7.471218 |   |   |      |          |  |  |  |  |      |          |          |  |  |  |     |          |          |          |  |  |     |          |          |          |          |  |     |          |          |          |          |          |     |          |          |          |          |          |     |          |          |          |          |          |     |          |          |          |          |          |     |          |          |          |          |          |      |          |          |          |          |          |      |          |          |          |          |          |      |          |          |          |          |          |      |          |          |          |          |          |      |          |          |          |          |          |      |          |          |          |          |          |      |          |          |          |          |          |      |          |          |          |          |          |      |          |          |          |          |          |      |          |          |          |          |          |      |          |          |          |          |          |      |          |          |          |          |          |      |          |          |          |          |          |      |          |          |          |          |          |      |          |          |          |          |          |      |          |          |          |          |          |      |          |          |          |          |          |      |          |          |          |          |          |      |          |          |          |          |          |  |   |   |   |   |    |     |          |  |  |  |  |     |          |          |  |  |  |     |          |          |          |  |  |     |          |          |          |          |  |      |          |          |          |          |          |      |          |          |          |          |          |      |          |          |          |          |          |      |          |          |          |          |          |      |          |          |          |          |          |      |          |          |          |          |          |      |          |          |          |          |          |      |          |          |          |          |          |      |          |          |          |          |          |      |          |          |          |          |          |      |          |          |          |          |          |
| 19 C                                                                                                           | 2.189390                                                                                                                                                                                                                                                                                                                                                                                                                                                                                                                                                                                                                                                                                                                                                                                                                                                                                                                                                                                                                                                                                                                                                                                                                                                                                                                                                                                                                                                                                                                                                                                                                                                                                                                                                                                                                                                                                                                                                                                                                                                                                                                                                                                                                                                                                                                                                                                                                                                                                                                                                                                                                                                                                                                                                                                                                                                                                                                                                                                                                                                                                                                                                                                                                                                                                                                                                                                                                                                                                                                                                                                                                                                                                                                                                                                                                                                                                                                                                                                                                                                                                                                                                                                                                                                                                                                                                                                                                                                                                                                                                                                                                                                                                                                                                                                                                                                                        | 6.416155 | 6.400238 | 7.051040 | 7.665134 |   |   |      |          |  |  |  |  |      |          |          |  |  |  |     |          |          |          |  |  |     |          |          |          |          |  |     |          |          |          |          |          |     |          |          |          |          |          |     |          |          |          |          |          |     |          |          |          |          |          |     |          |          |          |          |          |      |          |          |          |          |          |      |          |          |          |          |          |      |          |          |          |          |          |      |          |          |          |          |          |      |          |          |          |          |          |      |          |          |          |          |          |      |          |          |          |          |          |      |          |          |          |          |          |      |          |          |          |          |          |      |          |          |          |          |          |      |          |          |          |          |          |      |          |          |          |          |          |      |          |          |          |          |          |      |          |          |          |          |          |      |          |          |          |          |          |      |          |          |          |          |          |      |          |          |          |          |          |      |          |          |          |          |          |      |          |          |          |          |          |  |   |   |   |   |    |     |          |  |  |  |  |     |          |          |  |  |  |     |          |          |          |  |  |     |          |          |          |          |  |      |          |          |          |          |          |      |          |          |          |          |          |      |          |          |          |          |          |      |          |          |          |          |          |      |          |          |          |          |          |      |          |          |          |          |          |      |          |          |          |          |          |      |          |          |          |          |          |      |          |          |          |          |          |      |          |          |          |          |          |      |          |          |          |          |          |
| 20 H                                                                                                           | 2.923491                                                                                                                                                                                                                                                                                                                                                                                                                                                                                                                                                                                                                                                                                                                                                                                                                                                                                                                                                                                                                                                                                                                                                                                                                                                                                                                                                                                                                                                                                                                                                                                                                                                                                                                                                                                                                                                                                                                                                                                                                                                                                                                                                                                                                                                                                                                                                                                                                                                                                                                                                                                                                                                                                                                                                                                                                                                                                                                                                                                                                                                                                                                                                                                                                                                                                                                                                                                                                                                                                                                                                                                                                                                                                                                                                                                                                                                                                                                                                                                                                                                                                                                                                                                                                                                                                                                                                                                                                                                                                                                                                                                                                                                                                                                                                                                                                                                                        | 6.816317 | 7.677736 | 6.514569 | 6.628548 |   |   |      |          |  |  |  |  |      |          |          |  |  |  |     |          |          |          |  |  |     |          |          |          |          |  |     |          |          |          |          |          |     |          |          |          |          |          |     |          |          |          |          |          |     |          |          |          |          |          |     |          |          |          |          |          |      |          |          |          |          |          |      |          |          |          |          |          |      |          |          |          |          |          |      |          |          |          |          |          |      |          |          |          |          |          |      |          |          |          |          |          |      |          |          |          |          |          |      |          |          |          |          |          |      |          |          |          |          |          |      |          |          |          |          |          |      |          |          |          |          |          |      |          |          |          |          |          |      |          |          |          |          |          |      |          |          |          |          |          |      |          |          |          |          |          |      |          |          |          |          |          |      |          |          |          |          |          |      |          |          |          |          |          |      |          |          |          |          |          |  |   |   |   |   |    |     |          |  |  |  |  |     |          |          |  |  |  |     |          |          |          |  |  |     |          |          |          |          |  |      |          |          |          |          |          |      |          |          |          |          |          |      |          |          |          |          |          |      |          |          |          |          |          |      |          |          |          |          |          |      |          |          |          |          |          |      |          |          |          |          |          |      |          |          |          |          |          |      |          |          |          |          |          |      |          |          |          |          |          |      |          |          |          |          |          |
| 21 H                                                                                                           | 2.923428                                                                                                                                                                                                                                                                                                                                                                                                                                                                                                                                                                                                                                                                                                                                                                                                                                                                                                                                                                                                                                                                                                                                                                                                                                                                                                                                                                                                                                                                                                                                                                                                                                                                                                                                                                                                                                                                                                                                                                                                                                                                                                                                                                                                                                                                                                                                                                                                                                                                                                                                                                                                                                                                                                                                                                                                                                                                                                                                                                                                                                                                                                                                                                                                                                                                                                                                                                                                                                                                                                                                                                                                                                                                                                                                                                                                                                                                                                                                                                                                                                                                                                                                                                                                                                                                                                                                                                                                                                                                                                                                                                                                                                                                                                                                                                                                                                                                        | 6.816424 | 6.514989 | 7.677585 | 8.389691 |   |   |      |          |  |  |  |  |      |          |          |  |  |  |     |          |          |          |  |  |     |          |          |          |          |  |     |          |          |          |          |          |     |          |          |          |          |          |     |          |          |          |          |          |     |          |          |          |          |          |     |          |          |          |          |          |      |          |          |          |          |          |      |          |          |          |          |          |      |          |          |          |          |          |      |          |          |          |          |          |      |          |          |          |          |          |      |          |          |          |          |          |      |          |          |          |          |          |      |          |          |          |          |          |      |          |          |          |          |          |      |          |          |          |          |          |      |          |          |          |          |          |      |          |          |          |          |          |      |          |          |          |          |          |      |          |          |          |          |          |      |          |          |          |          |          |      |          |          |          |          |          |      |          |          |          |          |          |      |          |          |          |          |          |      |          |          |          |          |          |  |   |   |   |   |    |     |          |  |  |  |  |     |          |          |  |  |  |     |          |          |          |  |  |     |          |          |          |          |  |      |          |          |          |          |          |      |          |          |          |          |          |      |          |          |          |          |          |      |          |          |          |          |          |      |          |          |          |          |          |      |          |          |          |          |          |      |          |          |          |          |          |      |          |          |          |          |          |      |          |          |          |          |          |      |          |          |          |          |          |      |          |          |          |          |          |
| 22 C                                                                                                           | 2.169471                                                                                                                                                                                                                                                                                                                                                                                                                                                                                                                                                                                                                                                                                                                                                                                                                                                                                                                                                                                                                                                                                                                                                                                                                                                                                                                                                                                                                                                                                                                                                                                                                                                                                                                                                                                                                                                                                                                                                                                                                                                                                                                                                                                                                                                                                                                                                                                                                                                                                                                                                                                                                                                                                                                                                                                                                                                                                                                                                                                                                                                                                                                                                                                                                                                                                                                                                                                                                                                                                                                                                                                                                                                                                                                                                                                                                                                                                                                                                                                                                                                                                                                                                                                                                                                                                                                                                                                                                                                                                                                                                                                                                                                                                                                                                                                                                                                                        | 5.864449 | 5.967902 | 6.406547 | 6.985202 |   |   |      |          |  |  |  |  |      |          |          |  |  |  |     |          |          |          |  |  |     |          |          |          |          |  |     |          |          |          |          |          |     |          |          |          |          |          |     |          |          |          |          |          |     |          |          |          |          |          |     |          |          |          |          |          |      |          |          |          |          |          |      |          |          |          |          |          |      |          |          |          |          |          |      |          |          |          |          |          |      |          |          |          |          |          |      |          |          |          |          |          |      |          |          |          |          |          |      |          |          |          |          |          |      |          |          |          |          |          |      |          |          |          |          |          |      |          |          |          |          |          |      |          |          |          |          |          |      |          |          |          |          |          |      |          |          |          |          |          |      |          |          |          |          |          |      |          |          |          |          |          |      |          |          |          |          |          |      |          |          |          |          |          |      |          |          |          |          |          |  |   |   |   |   |    |     |          |  |  |  |  |     |          |          |  |  |  |     |          |          |          |  |  |     |          |          |          |          |  |      |          |          |          |          |          |      |          |          |          |          |          |      |          |          |          |          |          |      |          |          |          |          |          |      |          |          |          |          |          |      |          |          |          |          |          |      |          |          |          |          |          |      |          |          |          |          |          |      |          |          |          |          |          |      |          |          |          |          |          |      |          |          |          |          |          |
| 23 H                                                                                                           | 2.896270                                                                                                                                                                                                                                                                                                                                                                                                                                                                                                                                                                                                                                                                                                                                                                                                                                                                                                                                                                                                                                                                                                                                                                                                                                                                                                                                                                                                                                                                                                                                                                                                                                                                                                                                                                                                                                                                                                                                                                                                                                                                                                                                                                                                                                                                                                                                                                                                                                                                                                                                                                                                                                                                                                                                                                                                                                                                                                                                                                                                                                                                                                                                                                                                                                                                                                                                                                                                                                                                                                                                                                                                                                                                                                                                                                                                                                                                                                                                                                                                                                                                                                                                                                                                                                                                                                                                                                                                                                                                                                                                                                                                                                                                                                                                                                                                                                                                        | 5.796022 | 5.682723 | 6.516411 | 7.173176 |   |   |      |          |  |  |  |  |      |          |          |  |  |  |     |          |          |          |  |  |     |          |          |          |          |  |     |          |          |          |          |          |     |          |          |          |          |          |     |          |          |          |          |          |     |          |          |          |          |          |     |          |          |          |          |          |      |          |          |          |          |          |      |          |          |          |          |          |      |          |          |          |          |          |      |          |          |          |          |          |      |          |          |          |          |          |      |          |          |          |          |          |      |          |          |          |          |          |      |          |          |          |          |          |      |          |          |          |          |          |      |          |          |          |          |          |      |          |          |          |          |          |      |          |          |          |          |          |      |          |          |          |          |          |      |          |          |          |          |          |      |          |          |          |          |          |      |          |          |          |          |          |      |          |          |          |          |          |      |          |          |          |          |          |      |          |          |          |          |          |  |   |   |   |   |    |     |          |  |  |  |  |     |          |          |  |  |  |     |          |          |          |  |  |     |          |          |          |          |  |      |          |          |          |          |          |      |          |          |          |          |          |      |          |          |          |          |          |      |          |          |          |          |          |      |          |          |          |          |          |      |          |          |          |          |          |      |          |          |          |          |          |      |          |          |          |          |          |      |          |          |          |          |          |      |          |          |          |          |          |      |          |          |          |          |          |
| 24 C                                                                                                           | 2.169472                                                                                                                                                                                                                                                                                                                                                                                                                                                                                                                                                                                                                                                                                                                                                                                                                                                                                                                                                                                                                                                                                                                                                                                                                                                                                                                                                                                                                                                                                                                                                                                                                                                                                                                                                                                                                                                                                                                                                                                                                                                                                                                                                                                                                                                                                                                                                                                                                                                                                                                                                                                                                                                                                                                                                                                                                                                                                                                                                                                                                                                                                                                                                                                                                                                                                                                                                                                                                                                                                                                                                                                                                                                                                                                                                                                                                                                                                                                                                                                                                                                                                                                                                                                                                                                                                                                                                                                                                                                                                                                                                                                                                                                                                                                                                                                                                                                                        | 5.864379 | 6.406631 | 5.967668 | 6.331728 |   |   |      |          |  |  |  |  |      |          |          |  |  |  |     |          |          |          |  |  |     |          |          |          |          |  |     |          |          |          |          |          |     |          |          |          |          |          |     |          |          |          |          |          |     |          |          |          |          |          |     |          |          |          |          |          |      |          |          |          |          |          |      |          |          |          |          |          |      |          |          |          |          |          |      |          |          |          |          |          |      |          |          |          |          |          |      |          |          |          |          |          |      |          |          |          |          |          |      |          |          |          |          |          |      |          |          |          |          |          |      |          |          |          |          |          |      |          |          |          |          |          |      |          |          |          |          |          |      |          |          |          |          |          |      |          |          |          |          |          |      |          |          |          |          |          |      |          |          |          |          |          |      |          |          |          |          |          |      |          |          |          |          |          |      |          |          |          |          |          |  |   |   |   |   |    |     |          |  |  |  |  |     |          |          |  |  |  |     |          |          |          |  |  |     |          |          |          |          |  |      |          |          |          |          |          |      |          |          |          |          |          |      |          |          |          |          |          |      |          |          |          |          |          |      |          |          |          |          |          |      |          |          |          |          |          |      |          |          |          |          |          |      |          |          |          |          |          |      |          |          |          |          |          |      |          |          |          |          |          |      |          |          |          |          |          |
| 25 H                                                                                                           | 2.896283                                                                                                                                                                                                                                                                                                                                                                                                                                                                                                                                                                                                                                                                                                                                                                                                                                                                                                                                                                                                                                                                                                                                                                                                                                                                                                                                                                                                                                                                                                                                                                                                                                                                                                                                                                                                                                                                                                                                                                                                                                                                                                                                                                                                                                                                                                                                                                                                                                                                                                                                                                                                                                                                                                                                                                                                                                                                                                                                                                                                                                                                                                                                                                                                                                                                                                                                                                                                                                                                                                                                                                                                                                                                                                                                                                                                                                                                                                                                                                                                                                                                                                                                                                                                                                                                                                                                                                                                                                                                                                                                                                                                                                                                                                                                                                                                                                                                        | 5.795908 | 6.516375 | 5.682519 | 5.929066 |   |   |      |          |  |  |  |  |      |          |          |  |  |  |     |          |          |          |  |  |     |          |          |          |          |  |     |          |          |          |          |          |     |          |          |          |          |          |     |          |          |          |          |          |     |          |          |          |          |          |     |          |          |          |          |          |      |          |          |          |          |          |      |          |          |          |          |          |      |          |          |          |          |          |      |          |          |          |          |          |      |          |          |          |          |          |      |          |          |          |          |          |      |          |          |          |          |          |      |          |          |          |          |          |      |          |          |          |          |          |      |          |          |          |          |          |      |          |          |          |          |          |      |          |          |          |          |          |      |          |          |          |          |          |      |          |          |          |          |          |      |          |          |          |          |          |      |          |          |          |          |          |      |          |          |          |          |          |      |          |          |          |          |          |      |          |          |          |          |          |  |   |   |   |   |    |     |          |  |  |  |  |     |          |          |  |  |  |     |          |          |          |  |  |     |          |          |          |          |  |      |          |          |          |          |          |      |          |          |          |          |          |      |          |          |          |          |          |      |          |          |          |          |          |      |          |          |          |          |          |      |          |          |          |          |          |      |          |          |          |          |          |      |          |          |          |          |          |      |          |          |          |          |          |      |          |          |          |          |          |      |          |          |          |          |          |
| 26 C                                                                                                           | 2.189414                                                                                                                                                                                                                                                                                                                                                                                                                                                                                                                                                                                                                                                                                                                                                                                                                                                                                                                                                                                                                                                                                                                                                                                                                                                                                                                                                                                                                                                                                                                                                                                                                                                                                                                                                                                                                                                                                                                                                                                                                                                                                                                                                                                                                                                                                                                                                                                                                                                                                                                                                                                                                                                                                                                                                                                                                                                                                                                                                                                                                                                                                                                                                                                                                                                                                                                                                                                                                                                                                                                                                                                                                                                                                                                                                                                                                                                                                                                                                                                                                                                                                                                                                                                                                                                                                                                                                                                                                                                                                                                                                                                                                                                                                                                                                                                                                                                                        | 6.416074 | 7.051210 | 6.399877 | 6.687238 |   |   |      |          |  |  |  |  |      |          |          |  |  |  |     |          |          |          |  |  |     |          |          |          |          |  |     |          |          |          |          |          |     |          |          |          |          |          |     |          |          |          |          |          |     |          |          |          |          |          |     |          |          |          |          |          |      |          |          |          |          |          |      |          |          |          |          |          |      |          |          |          |          |          |      |          |          |          |          |          |      |          |          |          |          |          |      |          |          |          |          |          |      |          |          |          |          |          |      |          |          |          |          |          |      |          |          |          |          |          |      |          |          |          |          |          |      |          |          |          |          |          |      |          |          |          |          |          |      |          |          |          |          |          |      |          |          |          |          |          |      |          |          |          |          |          |      |          |          |          |          |          |      |          |          |          |          |          |      |          |          |          |          |          |      |          |          |          |          |          |  |   |   |   |   |    |     |          |  |  |  |  |     |          |          |  |  |  |     |          |          |          |  |  |     |          |          |          |          |  |      |          |          |          |          |          |      |          |          |          |          |          |      |          |          |          |          |          |      |          |          |          |          |          |      |          |          |          |          |          |      |          |          |          |          |          |      |          |          |          |          |          |      |          |          |          |          |          |      |          |          |          |          |          |      |          |          |          |          |          |      |          |          |          |          |          |
| 27 H                                                                                                           | 4.189546                                                                                                                                                                                                                                                                                                                                                                                                                                                                                                                                                                                                                                                                                                                                                                                                                                                                                                                                                                                                                                                                                                                                                                                                                                                                                                                                                                                                                                                                                                                                                                                                                                                                                                                                                                                                                                                                                                                                                                                                                                                                                                                                                                                                                                                                                                                                                                                                                                                                                                                                                                                                                                                                                                                                                                                                                                                                                                                                                                                                                                                                                                                                                                                                                                                                                                                                                                                                                                                                                                                                                                                                                                                                                                                                                                                                                                                                                                                                                                                                                                                                                                                                                                                                                                                                                                                                                                                                                                                                                                                                                                                                                                                                                                                                                                                                                                                                        | 2.833165 | 4.093199 | 2.705330 | 3.259768 |   |   |      |          |  |  |  |  |      |          |          |  |  |  |     |          |          |          |  |  |     |          |          |          |          |  |     |          |          |          |          |          |     |          |          |          |          |          |     |          |          |          |          |          |     |          |          |          |          |          |     |          |          |          |          |          |      |          |          |          |          |          |      |          |          |          |          |          |      |          |          |          |          |          |      |          |          |          |          |          |      |          |          |          |          |          |      |          |          |          |          |          |      |          |          |          |          |          |      |          |          |          |          |          |      |          |          |          |          |          |      |          |          |          |          |          |      |          |          |          |          |          |      |          |          |          |          |          |      |          |          |          |          |          |      |          |          |          |          |          |      |          |          |          |          |          |      |          |          |          |          |          |      |          |          |          |          |          |      |          |          |          |          |          |      |          |          |          |          |          |  |   |   |   |   |    |     |          |  |  |  |  |     |          |          |  |  |  |     |          |          |          |  |  |     |          |          |          |          |  |      |          |          |          |          |          |      |          |          |          |          |          |      |          |          |          |          |          |      |          |          |          |          |          |      |          |          |          |          |          |      |          |          |          |          |          |      |          |          |          |          |          |      |          |          |          |          |          |      |          |          |          |          |          |      |          |          |          |          |          |      |          |          |          |          |          |
| 28 H                                                                                                           | 4.189545                                                                                                                                                                                                                                                                                                                                                                                                                                                                                                                                                                                                                                                                                                                                                                                                                                                                                                                                                                                                                                                                                                                                                                                                                                                                                                                                                                                                                                                                                                                                                                                                                                                                                                                                                                                                                                                                                                                                                                                                                                                                                                                                                                                                                                                                                                                                                                                                                                                                                                                                                                                                                                                                                                                                                                                                                                                                                                                                                                                                                                                                                                                                                                                                                                                                                                                                                                                                                                                                                                                                                                                                                                                                                                                                                                                                                                                                                                                                                                                                                                                                                                                                                                                                                                                                                                                                                                                                                                                                                                                                                                                                                                                                                                                                                                                                                                                                        | 2.833159 | 2.705130 | 4.093319 | 5.074232 |   |   |      |          |  |  |  |  |      |          |          |  |  |  |     |          |          |          |  |  |     |          |          |          |          |  |     |          |          |          |          |          |     |          |          |          |          |          |     |          |          |          |          |          |     |          |          |          |          |          |     |          |          |          |          |          |      |          |          |          |          |          |      |          |          |          |          |          |      |          |          |          |          |          |      |          |          |          |          |          |      |          |          |          |          |          |      |          |          |          |          |          |      |          |          |          |          |          |      |          |          |          |          |          |      |          |          |          |          |          |      |          |          |          |          |          |      |          |          |          |          |          |      |          |          |          |          |          |      |          |          |          |          |          |      |          |          |          |          |          |      |          |          |          |          |          |      |          |          |          |          |          |      |          |          |          |          |          |      |          |          |          |          |          |      |          |          |          |          |          |  |   |   |   |   |    |     |          |  |  |  |  |     |          |          |  |  |  |     |          |          |          |  |  |     |          |          |          |          |  |      |          |          |          |          |          |      |          |          |          |          |          |      |          |          |          |          |          |      |          |          |          |          |          |      |          |          |          |          |          |      |          |          |          |          |          |      |          |          |          |          |          |      |          |          |          |          |          |      |          |          |          |          |          |      |          |          |          |          |          |      |          |          |          |          |          |
|                                                                                                                | 6                                                                                                                                                                                                                                                                                                                                                                                                                                                                                                                                                                                                                                                                                                                                                                                                                                                                                                                                                                                                                                                                                                                                                                                                                                                                                                                                                                                                                                                                                                                                                                                                                                                                                                                                                                                                                                                                                                                                                                                                                                                                                                                                                                                                                                                                                                                                                                                                                                                                                                                                                                                                                                                                                                                                                                                                                                                                                                                                                                                                                                                                                                                                                                                                                                                                                                                                                                                                                                                                                                                                                                                                                                                                                                                                                                                                                                                                                                                                                                                                                                                                                                                                                                                                                                                                                                                                                                                                                                                                                                                                                                                                                                                                                                                                                                                                                                                                               | 7        | 8        | 9        | 10       |   |   |      |          |  |  |  |  |      |          |          |  |  |  |     |          |          |          |  |  |     |          |          |          |          |  |     |          |          |          |          |          |     |          |          |          |          |          |     |          |          |          |          |          |     |          |          |          |          |          |     |          |          |          |          |          |      |          |          |          |          |          |      |          |          |          |          |          |      |          |          |          |          |          |      |          |          |          |          |          |      |          |          |          |          |          |      |          |          |          |          |          |      |          |          |          |          |          |      |          |          |          |          |          |      |          |          |          |          |          |      |          |          |          |          |          |      |          |          |          |          |          |      |          |          |          |          |          |      |          |          |          |          |          |      |          |          |          |          |          |      |          |          |          |          |          |      |          |          |          |          |          |      |          |          |          |          |          |      |          |          |          |          |          |      |          |          |          |          |          |  |   |   |   |   |    |     |          |  |  |  |  |     |          |          |  |  |  |     |          |          |          |  |  |     |          |          |          |          |  |      |          |          |          |          |          |      |          |          |          |          |          |      |          |          |          |          |          |      |          |          |          |          |          |      |          |          |          |          |          |      |          |          |          |          |          |      |          |          |          |          |          |      |          |          |          |          |          |      |          |          |          |          |          |      |          |          |          |          |          |      |          |          |          |          |          |
| 6 O                                                                                                            | 0.000000                                                                                                                                                                                                                                                                                                                                                                                                                                                                                                                                                                                                                                                                                                                                                                                                                                                                                                                                                                                                                                                                                                                                                                                                                                                                                                                                                                                                                                                                                                                                                                                                                                                                                                                                                                                                                                                                                                                                                                                                                                                                                                                                                                                                                                                                                                                                                                                                                                                                                                                                                                                                                                                                                                                                                                                                                                                                                                                                                                                                                                                                                                                                                                                                                                                                                                                                                                                                                                                                                                                                                                                                                                                                                                                                                                                                                                                                                                                                                                                                                                                                                                                                                                                                                                                                                                                                                                                                                                                                                                                                                                                                                                                                                                                                                                                                                                                                        |          |          |          |          |   |   |      |          |  |  |  |  |      |          |          |  |  |  |     |          |          |          |  |  |     |          |          |          |          |  |     |          |          |          |          |          |     |          |          |          |          |          |     |          |          |          |          |          |     |          |          |          |          |          |     |          |          |          |          |          |      |          |          |          |          |          |      |          |          |          |          |          |      |          |          |          |          |          |      |          |          |          |          |          |      |          |          |          |          |          |      |          |          |          |          |          |      |          |          |          |          |          |      |          |          |          |          |          |      |          |          |          |          |          |      |          |          |          |          |          |      |          |          |          |          |          |      |          |          |          |          |          |      |          |          |          |          |          |      |          |          |          |          |          |      |          |          |          |          |          |      |          |          |          |          |          |      |          |          |          |          |          |      |          |          |          |          |          |      |          |          |          |          |          |  |   |   |   |   |    |     |          |  |  |  |  |     |          |          |  |  |  |     |          |          |          |  |  |     |          |          |          |          |  |      |          |          |          |          |          |      |          |          |          |          |          |      |          |          |          |          |          |      |          |          |          |          |          |      |          |          |          |          |          |      |          |          |          |          |          |      |          |          |          |          |          |      |          |          |          |          |          |      |          |          |          |          |          |      |          |          |          |          |          |      |          |          |          |          |          |
| 7 C                                                                                                            | 3.552719                                                                                                                                                                                                                                                                                                                                                                                                                                                                                                                                                                                                                                                                                                                                                                                                                                                                                                                                                                                                                                                                                                                                                                                                                                                                                                                                                                                                                                                                                                                                                                                                                                                                                                                                                                                                                                                                                                                                                                                                                                                                                                                                                                                                                                                                                                                                                                                                                                                                                                                                                                                                                                                                                                                                                                                                                                                                                                                                                                                                                                                                                                                                                                                                                                                                                                                                                                                                                                                                                                                                                                                                                                                                                                                                                                                                                                                                                                                                                                                                                                                                                                                                                                                                                                                                                                                                                                                                                                                                                                                                                                                                                                                                                                                                                                                                                                                                        | 0.000000 |          |          |          |   |   |      |          |  |  |  |  |      |          |          |  |  |  |     |          |          |          |  |  |     |          |          |          |          |  |     |          |          |          |          |          |     |          |          |          |          |          |     |          |          |          |          |          |     |          |          |          |          |          |     |          |          |          |          |          |      |          |          |          |          |          |      |          |          |          |          |          |      |          |          |          |          |          |      |          |          |          |          |          |      |          |          |          |          |          |      |          |          |          |          |          |      |          |          |          |          |          |      |          |          |          |          |          |      |          |          |          |          |          |      |          |          |          |          |          |      |          |          |          |          |          |      |          |          |          |          |          |      |          |          |          |          |          |      |          |          |          |          |          |      |          |          |          |          |          |      |          |          |          |          |          |      |          |          |          |          |          |      |          |          |          |          |          |      |          |          |          |          |          |  |   |   |   |   |    |     |          |  |  |  |  |     |          |          |  |  |  |     |          |          |          |  |  |     |          |          |          |          |  |      |          |          |          |          |          |      |          |          |          |          |          |      |          |          |          |          |          |      |          |          |          |          |          |      |          |          |          |          |          |      |          |          |          |          |          |      |          |          |          |          |          |      |          |          |          |          |          |      |          |          |          |          |          |      |          |          |          |          |          |      |          |          |          |          |          |
| 8 O                                                                                                            | 4.258388                                                                                                                                                                                                                                                                                                                                                                                                                                                                                                                                                                                                                                                                                                                                                                                                                                                                                                                                                                                                                                                                                                                                                                                                                                                                                                                                                                                                                                                                                                                                                                                                                                                                                                                                                                                                                                                                                                                                                                                                                                                                                                                                                                                                                                                                                                                                                                                                                                                                                                                                                                                                                                                                                                                                                                                                                                                                                                                                                                                                                                                                                                                                                                                                                                                                                                                                                                                                                                                                                                                                                                                                                                                                                                                                                                                                                                                                                                                                                                                                                                                                                                                                                                                                                                                                                                                                                                                                                                                                                                                                                                                                                                                                                                                                                                                                                                                                        | 1.142949 | 0.000000 |          |          |   |   |      |          |  |  |  |  |      |          |          |  |  |  |     |          |          |          |  |  |     |          |          |          |          |  |     |          |          |          |          |          |     |          |          |          |          |          |     |          |          |          |          |          |     |          |          |          |          |          |     |          |          |          |          |          |      |          |          |          |          |          |      |          |          |          |          |          |      |          |          |          |          |          |      |          |          |          |          |          |      |          |          |          |          |          |      |          |          |          |          |          |      |          |          |          |          |          |      |          |          |          |          |          |      |          |          |          |          |          |      |          |          |          |          |          |      |          |          |          |          |          |      |          |          |          |          |          |      |          |          |          |          |          |      |          |          |          |          |          |      |          |          |          |          |          |      |          |          |          |          |          |      |          |          |          |          |          |      |          |          |          |          |          |      |          |          |          |          |          |  |   |   |   |   |    |     |          |  |  |  |  |     |          |          |  |  |  |     |          |          |          |  |  |     |          |          |          |          |  |      |          |          |          |          |          |      |          |          |          |          |          |      |          |          |          |          |          |      |          |          |          |          |          |      |          |          |          |          |          |      |          |          |          |          |          |      |          |          |          |          |          |      |          |          |          |          |          |      |          |          |          |          |          |      |          |          |          |          |          |      |          |          |          |          |          |
| 9 C                                                                                                            | 3.592609                                                                                                                                                                                                                                                                                                                                                                                                                                                                                                                                                                                                                                                                                                                                                                                                                                                                                                                                                                                                                                                                                                                                                                                                                                                                                                                                                                                                                                                                                                                                                                                                                                                                                                                                                                                                                                                                                                                                                                                                                                                                                                                                                                                                                                                                                                                                                                                                                                                                                                                                                                                                                                                                                                                                                                                                                                                                                                                                                                                                                                                                                                                                                                                                                                                                                                                                                                                                                                                                                                                                                                                                                                                                                                                                                                                                                                                                                                                                                                                                                                                                                                                                                                                                                                                                                                                                                                                                                                                                                                                                                                                                                                                                                                                                                                                                                                                                        | 3.778229 | 4.920186 | 0.000000 |          |   |   |      |          |  |  |  |  |      |          |          |  |  |  |     |          |          |          |  |  |     |          |          |          |          |  |     |          |          |          |          |          |     |          |          |          |          |          |     |          |          |          |          |          |     |          |          |          |          |          |     |          |          |          |          |          |      |          |          |          |          |          |      |          |          |          |          |          |      |          |          |          |          |          |      |          |          |          |          |          |      |          |          |          |          |          |      |          |          |          |          |          |      |          |          |          |          |          |      |          |          |          |          |          |      |          |          |          |          |          |      |          |          |          |          |          |      |          |          |          |          |          |      |          |          |          |          |          |      |          |          |          |          |          |      |          |          |          |          |          |      |          |          |          |          |          |      |          |          |          |          |          |      |          |          |          |          |          |      |          |          |          |          |          |      |          |          |          |          |          |  |   |   |   |   |    |     |          |  |  |  |  |     |          |          |  |  |  |     |          |          |          |  |  |     |          |          |          |          |  |      |          |          |          |          |          |      |          |          |          |          |          |      |          |          |          |          |          |      |          |          |          |          |          |      |          |          |          |          |          |      |          |          |          |          |          |      |          |          |          |          |          |      |          |          |          |          |          |      |          |          |          |          |          |      |          |          |          |          |          |      |          |          |          |          |          |
| 10 O                                                                                                           | 4.314537                                                                                                                                                                                                                                                                                                                                                                                                                                                                                                                                                                                                                                                                                                                                                                                                                                                                                                                                                                                                                                                                                                                                                                                                                                                                                                                                                                                                                                                                                                                                                                                                                                                                                                                                                                                                                                                                                                                                                                                                                                                                                                                                                                                                                                                                                                                                                                                                                                                                                                                                                                                                                                                                                                                                                                                                                                                                                                                                                                                                                                                                                                                                                                                                                                                                                                                                                                                                                                                                                                                                                                                                                                                                                                                                                                                                                                                                                                                                                                                                                                                                                                                                                                                                                                                                                                                                                                                                                                                                                                                                                                                                                                                                                                                                                                                                                                                                        | 4.921329 | 6.063143 | 1.143129 | 0.000000 |   |   |      |          |  |  |  |  |      |          |          |  |  |  |     |          |          |          |  |  |     |          |          |          |          |  |     |          |          |          |          |          |     |          |          |          |          |          |     |          |          |          |          |          |     |          |          |          |          |          |     |          |          |          |          |          |      |          |          |          |          |          |      |          |          |          |          |          |      |          |          |          |          |          |      |          |          |          |          |          |      |          |          |          |          |          |      |          |          |          |          |          |      |          |          |          |          |          |      |          |          |          |          |          |      |          |          |          |          |          |      |          |          |          |          |          |      |          |          |          |          |          |      |          |          |          |          |          |      |          |          |          |          |          |      |          |          |          |          |          |      |          |          |          |          |          |      |          |          |          |          |          |      |          |          |          |          |          |      |          |          |          |          |          |      |          |          |          |          |          |  |   |   |   |   |    |     |          |  |  |  |  |     |          |          |  |  |  |     |          |          |          |  |  |     |          |          |          |          |  |      |          |          |          |          |          |      |          |          |          |          |          |      |          |          |          |          |          |      |          |          |          |          |          |      |          |          |          |          |          |      |          |          |          |          |          |      |          |          |          |          |          |      |          |          |          |          |          |      |          |          |          |          |          |      |          |          |          |          |          |      |          |          |          |          |          |
| 11 C                                                                                                           | 3.442843                                                                                                                                                                                                                                                                                                                                                                                                                                                                                                                                                                                                                                                                                                                                                                                                                                                                                                                                                                                                                                                                                                                                                                                                                                                                                                                                                                                                                                                                                                                                                                                                                                                                                                                                                                                                                                                                                                                                                                                                                                                                                                                                                                                                                                                                                                                                                                                                                                                                                                                                                                                                                                                                                                                                                                                                                                                                                                                                                                                                                                                                                                                                                                                                                                                                                                                                                                                                                                                                                                                                                                                                                                                                                                                                                                                                                                                                                                                                                                                                                                                                                                                                                                                                                                                                                                                                                                                                                                                                                                                                                                                                                                                                                                                                                                                                                                                                        | 2.654058 | 3.534816 | 2.633982 | 3.535040 |   |   |      |          |  |  |  |  |      |          |          |  |  |  |     |          |          |          |  |  |     |          |          |          |          |  |     |          |          |          |          |          |     |          |          |          |          |          |     |          |          |          |          |          |     |          |          |          |          |          |     |          |          |          |          |          |      |          |          |          |          |          |      |          |          |          |          |          |      |          |          |          |          |          |      |          |          |          |          |          |      |          |          |          |          |          |      |          |          |          |          |          |      |          |          |          |          |          |      |          |          |          |          |          |      |          |          |          |          |          |      |          |          |          |          |          |      |          |          |          |          |          |      |          |          |          |          |          |      |          |          |          |          |          |      |          |          |          |          |          |      |          |          |          |          |          |      |          |          |          |          |          |      |          |          |          |          |          |      |          |          |          |          |          |      |          |          |          |          |          |  |   |   |   |   |    |     |          |  |  |  |  |     |          |          |  |  |  |     |          |          |          |  |  |     |          |          |          |          |  |      |          |          |          |          |          |      |          |          |          |          |          |      |          |          |          |          |          |      |          |          |          |          |          |      |          |          |          |          |          |      |          |          |          |          |          |      |          |          |          |          |          |      |          |          |          |          |          |      |          |          |          |          |          |      |          |          |          |          |          |      |          |          |          |          |          |
| 12 O                                                                                                           | 4.115932                                                                                                                                                                                                                                                                                                                                                                                                                                                                                                                                                                                                                                                                                                                                                                                                                                                                                                                                                                                                                                                                                                                                                                                                                                                                                                                                                                                                                                                                                                                                                                                                                                                                                                                                                                                                                                                                                                                                                                                                                                                                                                                                                                                                                                                                                                                                                                                                                                                                                                                                                                                                                                                                                                                                                                                                                                                                                                                                                                                                                                                                                                                                                                                                                                                                                                                                                                                                                                                                                                                                                                                                                                                                                                                                                                                                                                                                                                                                                                                                                                                                                                                                                                                                                                                                                                                                                                                                                                                                                                                                                                                                                                                                                                                                                                                                                                                                        | 3.555320 | 4.241128 | 3.530710 | 4.240556 |   |   |      |          |  |  |  |  |      |          |          |  |  |  |     |          |          |          |  |  |     |          |          |          |          |  |     |          |          |          |          |          |     |          |          |          |          |          |     |          |          |          |          |          |     |          |          |          |          |          |     |          |          |          |          |          |      |          |          |          |          |          |      |          |          |          |          |          |      |          |          |          |          |          |      |          |          |          |          |          |      |          |          |          |          |          |      |          |          |          |          |          |      |          |          |          |          |          |      |          |          |          |          |          |      |          |          |          |          |          |      |          |          |          |          |          |      |          |          |          |          |          |      |          |          |          |          |          |      |          |          |          |          |          |      |          |          |          |          |          |      |          |          |          |          |          |      |          |          |          |          |          |      |          |          |          |          |          |      |          |          |          |          |          |      |          |          |          |          |          |  |   |   |   |   |    |     |          |  |  |  |  |     |          |          |  |  |  |     |          |          |          |  |  |     |          |          |          |          |  |      |          |          |          |          |          |      |          |          |          |          |          |      |          |          |          |          |          |      |          |          |          |          |          |      |          |          |          |          |          |      |          |          |          |          |          |      |          |          |          |          |          |      |          |          |          |          |          |      |          |          |          |          |          |      |          |          |          |          |          |      |          |          |          |          |          |
| 13 S                                                                                                           | 3.754096                                                                                                                                                                                                                                                                                                                                                                                                                                                                                                                                                                                                                                                                                                                                                                                                                                                                                                                                                                                                                                                                                                                                                                                                                                                                                                                                                                                                                                                                                                                                                                                                                                                                                                                                                                                                                                                                                                                                                                                                                                                                                                                                                                                                                                                                                                                                                                                                                                                                                                                                                                                                                                                                                                                                                                                                                                                                                                                                                                                                                                                                                                                                                                                                                                                                                                                                                                                                                                                                                                                                                                                                                                                                                                                                                                                                                                                                                                                                                                                                                                                                                                                                                                                                                                                                                                                                                                                                                                                                                                                                                                                                                                                                                                                                                                                                                                                                        | 3.455278 | 3.868272 | 4.649177 | 5.497724 |   |   |      |          |  |  |  |  |      |          |          |  |  |  |     |          |          |          |  |  |     |          |          |          |          |  |     |          |          |          |          |          |     |          |          |          |          |          |     |          |          |          |          |          |     |          |          |          |          |          |     |          |          |          |          |          |      |          |          |          |          |          |      |          |          |          |          |          |      |          |          |          |          |          |      |          |          |          |          |          |      |          |          |          |          |          |      |          |          |          |          |          |      |          |          |          |          |          |      |          |          |          |          |          |      |          |          |          |          |          |      |          |          |          |          |          |      |          |          |          |          |          |      |          |          |          |          |          |      |          |          |          |          |          |      |          |          |          |          |          |      |          |          |          |          |          |      |          |          |          |          |          |      |          |          |          |          |          |      |          |          |          |          |          |      |          |          |          |          |          |  |   |   |   |   |    |     |          |  |  |  |  |     |          |          |  |  |  |     |          |          |          |  |  |     |          |          |          |          |  |      |          |          |          |          |          |      |          |          |          |          |          |      |          |          |          |          |          |      |          |          |          |          |          |      |          |          |          |          |          |      |          |          |          |          |          |      |          |          |          |          |          |      |          |          |          |          |          |      |          |          |          |          |          |      |          |          |          |          |          |      |          |          |          |          |          |
| 14 S                                                                                                           | 5.746464                                                                                                                                                                                                                                                                                                                                                                                                                                                                                                                                                                                                                                                                                                                                                                                                                                                                                                                                                                                                                                                                                                                                                                                                                                                                                                                                                                                                                                                                                                                                                                                                                                                                                                                                                                                                                                                                                                                                                                                                                                                                                                                                                                                                                                                                                                                                                                                                                                                                                                                                                                                                                                                                                                                                                                                                                                                                                                                                                                                                                                                                                                                                                                                                                                                                                                                                                                                                                                                                                                                                                                                                                                                                                                                                                                                                                                                                                                                                                                                                                                                                                                                                                                                                                                                                                                                                                                                                                                                                                                                                                                                                                                                                                                                                                                                                                                                                        | 3.455534 | 3.868502 | 4.649043 | 5.497485 |   |   |      |          |  |  |  |  |      |          |          |  |  |  |     |          |          |          |  |  |     |          |          |          |          |  |     |          |          |          |          |          |     |          |          |          |          |          |     |          |          |          |          |          |     |          |          |          |          |          |     |          |          |          |          |          |      |          |          |          |          |          |      |          |          |          |          |          |      |          |          |          |          |          |      |          |          |          |          |          |      |          |          |          |          |          |      |          |          |          |          |          |      |          |          |          |          |          |      |          |          |          |          |          |      |          |          |          |          |          |      |          |          |          |          |          |      |          |          |          |          |          |      |          |          |          |          |          |      |          |          |          |          |          |      |          |          |          |          |          |      |          |          |          |          |          |      |          |          |          |          |          |      |          |          |          |          |          |      |          |          |          |          |          |      |          |          |          |          |          |  |   |   |   |   |    |     |          |  |  |  |  |     |          |          |  |  |  |     |          |          |          |  |  |     |          |          |          |          |  |      |          |          |          |          |          |      |          |          |          |          |          |      |          |          |          |          |          |      |          |          |          |          |          |      |          |          |          |          |          |      |          |          |          |          |          |      |          |          |          |          |          |      |          |          |          |          |          |      |          |          |          |          |          |      |          |          |          |          |          |      |          |          |          |          |          |
| 15 C                                                                                                           | 3.493356                                                                                                                                                                                                                                                                                                                                                                                                                                                                                                                                                                                                                                                                                                                                                                                                                                                                                                                                                                                                                                                                                                                                                                                                                                                                                                                                                                                                                                                                                                                                                                                                                                                                                                                                                                                                                                                                                                                                                                                                                                                                                                                                                                                                                                                                                                                                                                                                                                                                                                                                                                                                                                                                                                                                                                                                                                                                                                                                                                                                                                                                                                                                                                                                                                                                                                                                                                                                                                                                                                                                                                                                                                                                                                                                                                                                                                                                                                                                                                                                                                                                                                                                                                                                                                                                                                                                                                                                                                                                                                                                                                                                                                                                                                                                                                                                                                                                        | 3.170548 | 4.014460 | 3.072901 | 3.863797 |   |   |      |          |  |  |  |  |      |          |          |  |  |  |     |          |          |          |  |  |     |          |          |          |          |  |     |          |          |          |          |          |     |          |          |          |          |          |     |          |          |          |          |          |     |          |          |          |          |          |     |          |          |          |          |          |      |          |          |          |          |          |      |          |          |          |          |          |      |          |          |          |          |          |      |          |          |          |          |          |      |          |          |          |          |          |      |          |          |          |          |          |      |          |          |          |          |          |      |          |          |          |          |          |      |          |          |          |          |          |      |          |          |          |          |          |      |          |          |          |          |          |      |          |          |          |          |          |      |          |          |          |          |          |      |          |          |          |          |          |      |          |          |          |          |          |      |          |          |          |          |          |      |          |          |          |          |          |      |          |          |          |          |          |      |          |          |          |          |          |  |   |   |   |   |    |     |          |  |  |  |  |     |          |          |  |  |  |     |          |          |          |  |  |     |          |          |          |          |  |      |          |          |          |          |          |      |          |          |          |          |          |      |          |          |          |          |          |      |          |          |          |          |          |      |          |          |          |          |          |      |          |          |          |          |          |      |          |          |          |          |          |      |          |          |          |          |          |      |          |          |          |          |          |      |          |          |          |          |          |      |          |          |          |          |          |
| 16 C                                                                                                           | 4.531249                                                                                                                                                                                                                                                                                                                                                                                                                                                                                                                                                                                                                                                                                                                                                                                                                                                                                                                                                                                                                                                                                                                                                                                                                                                                                                                                                                                                                                                                                                                                                                                                                                                                                                                                                                                                                                                                                                                                                                                                                                                                                                                                                                                                                                                                                                                                                                                                                                                                                                                                                                                                                                                                                                                                                                                                                                                                                                                                                                                                                                                                                                                                                                                                                                                                                                                                                                                                                                                                                                                                                                                                                                                                                                                                                                                                                                                                                                                                                                                                                                                                                                                                                                                                                                                                                                                                                                                                                                                                                                                                                                                                                                                                                                                                                                                                                                                                        | 3.170661 | 4.014548 | 3.072807 | 3.863646 |   |   |      |          |  |  |  |  |      |          |          |  |  |  |     |          |          |          |  |  |     |          |          |          |          |  |     |          |          |          |          |          |     |          |          |          |          |          |     |          |          |          |          |          |     |          |          |          |          |          |     |          |          |          |          |          |      |          |          |          |          |          |      |          |          |          |          |          |      |          |          |          |          |          |      |          |          |          |          |          |      |          |          |          |          |          |      |          |          |          |          |          |      |          |          |          |          |          |      |          |          |          |          |          |      |          |          |          |          |          |      |          |          |          |          |          |      |          |          |          |          |          |      |          |          |          |          |          |      |          |          |          |          |          |      |          |          |          |          |          |      |          |          |          |          |          |      |          |          |          |          |          |      |          |          |          |          |          |      |          |          |          |          |          |      |          |          |          |          |          |  |   |   |   |   |    |     |          |  |  |  |  |     |          |          |  |  |  |     |          |          |          |  |  |     |          |          |          |          |  |      |          |          |          |          |          |      |          |          |          |          |          |      |          |          |          |          |          |      |          |          |          |          |          |      |          |          |          |          |          |      |          |          |          |          |          |      |          |          |          |          |          |      |          |          |          |          |          |      |          |          |          |          |          |      |          |          |          |          |          |      |          |          |          |          |          |
| 17 H                                                                                                           | 8.060288                                                                                                                                                                                                                                                                                                                                                                                                                                                                                                                                                                                                                                                                                                                                                                                                                                                                                                                                                                                                                                                                                                                                                                                                                                                                                                                                                                                                                                                                                                                                                                                                                                                                                                                                                                                                                                                                                                                                                                                                                                                                                                                                                                                                                                                                                                                                                                                                                                                                                                                                                                                                                                                                                                                                                                                                                                                                                                                                                                                                                                                                                                                                                                                                                                                                                                                                                                                                                                                                                                                                                                                                                                                                                                                                                                                                                                                                                                                                                                                                                                                                                                                                                                                                                                                                                                                                                                                                                                                                                                                                                                                                                                                                                                                                                                                                                                                                        | 6.561633 | 6.397628 | 8.423493 | 9.227175 |   |   |      |          |  |  |  |  |      |          |          |  |  |  |     |          |          |          |  |  |     |          |          |          |          |  |     |          |          |          |          |          |     |          |          |          |          |          |     |          |          |          |          |          |     |          |          |          |          |          |     |          |          |          |          |          |      |          |          |          |          |          |      |          |          |          |          |          |      |          |          |          |          |          |      |          |          |          |          |          |      |          |          |          |          |          |      |          |          |          |          |          |      |          |          |          |          |          |      |          |          |          |          |          |      |          |          |          |          |          |      |          |          |          |          |          |      |          |          |          |          |          |      |          |          |          |          |          |      |          |          |          |          |          |      |          |          |          |          |          |      |          |          |          |          |          |      |          |          |          |          |          |      |          |          |          |          |          |      |          |          |          |          |          |      |          |          |          |          |          |  |   |   |   |   |    |     |          |  |  |  |  |     |          |          |  |  |  |     |          |          |          |  |  |     |          |          |          |          |  |      |          |          |          |          |          |      |          |          |          |          |          |      |          |          |          |          |          |      |          |          |          |          |          |      |          |          |          |          |          |      |          |          |          |          |          |      |          |          |          |          |          |      |          |          |          |          |          |      |          |          |          |          |          |      |          |          |          |          |          |      |          |          |          |          |          |
| 18 C                                                                                                           | 7.471679                                                                                                                                                                                                                                                                                                                                                                                                                                                                                                                                                                                                                                                                                                                                                                                                                                                                                                                                                                                                                                                                                                                                                                                                                                                                                                                                                                                                                                                                                                                                                                                                                                                                                                                                                                                                                                                                                                                                                                                                                                                                                                                                                                                                                                                                                                                                                                                                                                                                                                                                                                                                                                                                                                                                                                                                                                                                                                                                                                                                                                                                                                                                                                                                                                                                                                                                                                                                                                                                                                                                                                                                                                                                                                                                                                                                                                                                                                                                                                                                                                                                                                                                                                                                                                                                                                                                                                                                                                                                                                                                                                                                                                                                                                                                                                                                                                                                        | 5.735415 | 5.456598 | 7.982850 | 8.875759 |   |   |      |          |  |  |  |  |      |          |          |  |  |  |     |          |          |          |  |  |     |          |          |          |          |  |     |          |          |          |          |          |     |          |          |          |          |          |     |          |          |          |          |          |     |          |          |          |          |          |     |          |          |          |          |          |      |          |          |          |          |          |      |          |          |          |          |          |      |          |          |          |          |          |      |          |          |          |          |          |      |          |          |          |          |          |      |          |          |          |          |          |      |          |          |          |          |          |      |          |          |          |          |          |      |          |          |          |          |          |      |          |          |          |          |          |      |          |          |          |          |          |      |          |          |          |          |          |      |          |          |          |          |          |      |          |          |          |          |          |      |          |          |          |          |          |      |          |          |          |          |          |      |          |          |          |          |          |      |          |          |          |          |          |      |          |          |          |          |          |  |   |   |   |   |    |     |          |  |  |  |  |     |          |          |  |  |  |     |          |          |          |  |  |     |          |          |          |          |  |      |          |          |          |          |          |      |          |          |          |          |          |      |          |          |          |          |          |      |          |          |          |          |          |      |          |          |          |          |          |      |          |          |          |          |          |      |          |          |          |          |          |      |          |          |          |          |          |      |          |          |          |          |          |      |          |          |          |          |          |      |          |          |          |          |          |
| 19 C                                                                                                           | 6.687725                                                                                                                                                                                                                                                                                                                                                                                                                                                                                                                                                                                                                                                                                                                                                                                                                                                                                                                                                                                                                                                                                                                                                                                                                                                                                                                                                                                                                                                                                                                                                                                                                                                                                                                                                                                                                                                                                                                                                                                                                                                                                                                                                                                                                                                                                                                                                                                                                                                                                                                                                                                                                                                                                                                                                                                                                                                                                                                                                                                                                                                                                                                                                                                                                                                                                                                                                                                                                                                                                                                                                                                                                                                                                                                                                                                                                                                                                                                                                                                                                                                                                                                                                                                                                                                                                                                                                                                                                                                                                                                                                                                                                                                                                                                                                                                                                                                                        | 5.292360 | 4.910192 | 7.819047 | 8.767628 |   |   |      |          |  |  |  |  |      |          |          |  |  |  |     |          |          |          |  |  |     |          |          |          |          |  |     |          |          |          |          |          |     |          |          |          |          |          |     |          |          |          |          |          |     |          |          |          |          |          |     |          |          |          |          |          |      |          |          |          |          |          |      |          |          |          |          |          |      |          |          |          |          |          |      |          |          |          |          |          |      |          |          |          |          |          |      |          |          |          |          |          |      |          |          |          |          |          |      |          |          |          |          |          |      |          |          |          |          |          |      |          |          |          |          |          |      |          |          |          |          |          |      |          |          |          |          |          |      |          |          |          |          |          |      |          |          |          |          |          |      |          |          |          |          |          |      |          |          |          |          |          |      |          |          |          |          |          |      |          |          |          |          |          |      |          |          |          |          |          |  |   |   |   |   |    |     |          |  |  |  |  |     |          |          |  |  |  |     |          |          |          |  |  |     |          |          |          |          |  |      |          |          |          |          |          |      |          |          |          |          |          |      |          |          |          |          |          |      |          |          |          |          |          |      |          |          |          |          |          |      |          |          |          |          |          |      |          |          |          |          |          |      |          |          |          |          |          |      |          |          |          |          |          |      |          |          |          |          |          |      |          |          |          |          |          |
| 20 H                                                                                                           | 8.389943                                                                                                                                                                                                                                                                                                                                                                                                                                                                                                                                                                                                                                                                                                                                                                                                                                                                                                                                                                                                                                                                                                                                                                                                                                                                                                                                                                                                                                                                                                                                                                                                                                                                                                                                                                                                                                                                                                                                                                                                                                                                                                                                                                                                                                                                                                                                                                                                                                                                                                                                                                                                                                                                                                                                                                                                                                                                                                                                                                                                                                                                                                                                                                                                                                                                                                                                                                                                                                                                                                                                                                                                                                                                                                                                                                                                                                                                                                                                                                                                                                                                                                                                                                                                                                                                                                                                                                                                                                                                                                                                                                                                                                                                                                                                                                                                                                                                        | 5.810885 | 5.494140 | 8.121014 | 9.022444 |   |   |      |          |  |  |  |  |      |          |          |  |  |  |     |          |          |          |  |  |     |          |          |          |          |  |     |          |          |          |          |          |     |          |          |          |          |          |     |          |          |          |          |          |     |          |          |          |          |          |     |          |          |          |          |          |      |          |          |          |          |          |      |          |          |          |          |          |      |          |          |          |          |          |      |          |          |          |          |          |      |          |          |          |          |          |      |          |          |          |          |          |      |          |          |          |          |          |      |          |          |          |          |          |      |          |          |          |          |          |      |          |          |          |          |          |      |          |          |          |          |          |      |          |          |          |          |          |      |          |          |          |          |          |      |          |          |          |          |          |      |          |          |          |          |          |      |          |          |          |          |          |      |          |          |          |          |          |      |          |          |          |          |          |      |          |          |          |          |          |  |   |   |   |   |    |     |          |  |  |  |  |     |          |          |  |  |  |     |          |          |          |  |  |     |          |          |          |          |  |      |          |          |          |          |          |      |          |          |          |          |          |      |          |          |          |          |          |      |          |          |          |          |          |      |          |          |          |          |          |      |          |          |          |          |          |      |          |          |          |          |          |      |          |          |          |          |          |      |          |          |          |          |          |      |          |          |          |          |          |      |          |          |          |          |          |

|  |    |   |          |           |          |          |          |
|--|----|---|----------|-----------|----------|----------|----------|
|  | 21 | H | 6.629126 | 5.811039  | 5.494438 | 8.121096 | 9.022547 |
|  | 22 | C | 6.332020 | 4.430685  | 3.821060 | 7.486287 | 8.529250 |
|  | 23 | H | 5.929289 | 4.224192  | 3.479789 | 7.502545 | 8.578493 |
|  | 24 | C | 6.985336 | 4.430593  | 3.820898 | 7.486228 | 8.529184 |
|  | 25 | H | 7.173154 | 4.224027  | 3.479469 | 7.502453 | 8.578389 |
|  | 26 | C | 7.665404 | 5.292252  | 4.910002 | 7.818978 | 8.767548 |
|  | 27 | H | 5.074080 | 3.914777  | 4.847100 | 2.778869 | 3.330292 |
|  | 28 | H | 3.259511 | 3.914636  | 4.846989 | 2.779083 | 3.330630 |
|  |    |   | 11       | 12        | 13       | 14       | 15       |
|  | 11 | C | 0.000000 |           |          |          |          |
|  | 12 | O | 1.147476 | 0.000000  |          |          |          |
|  | 13 | S | 5.276388 | 6.352676  | 0.000000 |          |          |
|  | 14 | S | 5.276475 | 6.352797  | 3.128517 | 0.000000 |          |
|  | 15 | C | 4.293069 | 5.428563  | 1.737999 | 2.706894 | 0.000000 |
|  | 16 | C | 4.293108 | 5.428616  | 2.706890 | 1.738000 | 1.376570 |
|  | 17 | H | 8.961248 | 10.020542 | 4.368233 | 4.367919 | 5.485509 |
|  | 18 | C | 8.239459 | 9.256804  | 3.935144 | 3.934993 | 5.125793 |
|  | 19 | C | 7.827928 | 8.791640  | 3.471147 | 4.393827 | 4.970901 |
|  | 20 | H | 8.229048 | 9.189698  | 5.121348 | 3.542868 | 5.752004 |
|  | 21 | H | 8.229269 | 9.189950  | 3.542738 | 5.121166 | 5.202501 |
|  | 22 | C | 7.059218 | 7.932768  | 3.644892 | 4.217409 | 4.974189 |
|  | 23 | H | 6.780253 | 7.559905  | 3.862144 | 4.831917 | 5.210128 |
|  | 24 | C | 7.059107 | 7.932648  | 4.217213 | 3.645185 | 5.169400 |
|  | 25 | H | 6.780054 | 7.559685  | 4.831656 | 3.862621 | 5.554708 |
|  | 26 | C | 7.827786 | 8.791482  | 4.393890 | 3.471230 | 5.282402 |
|  | 27 | H | 4.464473 | 5.549706  | 3.692759 | 2.411863 | 2.148597 |
|  | 28 | H | 4.464440 | 5.549645  | 2.411863 | 3.692755 | 1.084384 |
|  |    |   | 16       | 17        | 18       | 19       | 20       |
|  | 16 | C | 0.000000 |           |          |          |          |
|  | 17 | H | 5.485401 | 0.000000  |          |          |          |
|  | 18 | C | 5.125741 | 1.080584  | 0.000000 |          |          |
|  | 19 | C | 5.282320 | 2.240833  | 1.430137 | 0.000000 |          |
|  | 20 | H | 5.202679 | 2.696775  | 2.241935 | 3.362458 | 0.000000 |
|  | 21 | H | 5.751805 | 2.696790  | 2.241940 | 1.080021 | 4.371343 |
|  | 22 | C | 5.169440 | 3.342845  | 2.299505 | 1.418111 | 3.358215 |
|  | 23 | H | 5.554745 | 4.356584  | 3.346041 | 2.234805 | 4.365136 |
|  | 24 | C | 4.974306 | 3.342837  | 2.299499 | 2.312362 | 2.234003 |
|  | 25 | H | 5.210339 | 4.356574  | 3.346034 | 3.353092 | 2.697791 |
|  | 26 | C | 4.970985 | 2.240821  | 1.430130 | 2.319578 | 1.080021 |
|  | 27 | H | 1.084383 | 6.288807  | 6.026163 | 6.301114 | 5.909686 |
|  | 28 | H | 2.148595 | 6.288960  | 6.026229 | 5.822923 | 6.771287 |
|  |    |   | 21       | 22        | 23       | 24       | 25       |
|  | 21 | H | 0.000000 |           |          |          |          |
|  | 22 | C | 2.234001 | 0.000000  |          |          |          |
|  | 23 | H | 2.697792 | 1.080338  | 0.000000 |          |          |
|  | 24 | C | 3.358208 | 1.438190  | 2.245347 | 0.000000 |          |
|  | 25 | H | 4.365131 | 2.245348  | 2.693980 | 1.080338 | 0.000000 |
|  | 26 | C | 3.362456 | 2.312369  | 3.353098 | 1.418113 | 2.234803 |
|  | 27 | H | 6.771042 | 6.217898  | 6.624490 | 5.921850 | 6.095245 |
|  | 28 | H | 5.909450 | 5.921673  | 6.094937 | 6.217834 | 6.624424 |



|                                                                                                               |          |          |          |          |          |          |  |
|---------------------------------------------------------------------------------------------------------------|----------|----------|----------|----------|----------|----------|--|
|                                                                                                               | 26       | 27       | 28       |          |          |          |  |
|                                                                                                               | 26 C     | 0.000000 |          |          |          |          |  |
|                                                                                                               | 27 H     | 5.823044 | 0.000000 |          |          |          |  |
|                                                                                                               | 28 H     | 6.301213 | 2.499385 | 0.000000 |          |          |  |
| 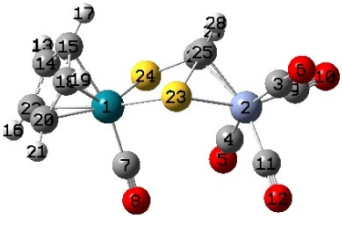 <p>3. -2787.72102 +21.0</p> |          | 1        | 2        | 3        | 4        | 5        |  |
|                                                                                                               | 1 Rh     | 0.000000 |          |          |          |          |  |
|                                                                                                               | 2 Cr     | 4.074845 | 0.000000 |          |          |          |  |
|                                                                                                               | 3 C      | 5.253124 | 1.875095 | 0.000000 |          |          |  |
|                                                                                                               | 4 C      | 4.083884 | 1.878063 | 3.711599 | 0.000000 |          |  |
|                                                                                                               | 5 O      | 4.581726 | 3.019100 | 4.830771 | 1.143970 | 0.000000 |  |
|                                                                                                               | 6 O      | 6.199649 | 3.018178 | 1.145721 | 4.834237 | 5.938842 |  |
|                                                                                                               | 7 C      | 1.874476 | 3.932936 | 5.417917 | 3.341078 | 3.552854 |  |
|                                                                                                               | 8 O      | 3.007742 | 4.290746 | 5.840159 | 3.379269 | 3.337016 |  |
|                                                                                                               | 9 C      | 5.657513 | 1.824864 | 2.474593 | 2.491232 | 3.330553 |  |
|                                                                                                               | 10 O     | 6.706022 | 2.974453 | 3.342338 | 3.371698 | 3.981422 |  |
|                                                                                                               | 11 C     | 4.987766 | 1.850525 | 2.502545 | 2.523094 | 3.381517 |  |
|                                                                                                               | 12 O     | 5.751757 | 2.996179 | 3.383005 | 3.398175 | 4.037124 |  |
|                                                                                                               | 13 H     | 2.951817 | 6.365437 | 7.525961 | 6.157215 | 6.403156 |  |
|                                                                                                               | 14 C     | 2.248870 | 6.024659 | 7.088163 | 5.975981 | 6.326416 |  |
|                                                                                                               | 15 C     | 2.225723 | 5.576709 | 6.301682 | 5.973791 | 6.562314 |  |
|                                                                                                               | 16 H     | 2.977685 | 6.911187 | 8.218507 | 6.421686 | 6.484052 |  |
|                                                                                                               | 17 H     | 2.947889 | 5.587851 | 6.106663 | 6.197771 | 6.879030 |  |
|                                                                                                               | 18 C     | 2.246604 | 5.656759 | 6.265720 | 6.141918 | 6.767747 |  |
|                                                                                                               | 19 H     | 2.953516 | 5.698782 | 5.996545 | 6.465508 | 7.212615 |  |
|                                                                                                               | 20 C     | 2.244559 | 6.095753 | 6.989452 | 6.198825 | 6.623224 |  |
|                                                                                                               | 21 H     | 2.978771 | 6.538692 | 7.393695 | 6.607320 | 6.992827 |  |
|                                                                                                               | 22 C     | 2.243145 | 6.309327 | 7.461589 | 6.093687 | 6.341889 |  |
|                                                                                                               | 23 S     | 2.362468 | 2.446336 | 3.038510 | 3.494927 | 4.462402 |  |
|                                                                                                               | 24 S     | 2.358417 | 3.532595 | 5.041699 | 3.088520 | 3.429853 |  |
|                                                                                                               | 25 C     | 3.237302 | 2.090458 | 2.641889 | 3.303933 | 4.320651 |  |
|                                                                                                               | 26 C     | 3.237143 | 2.295460 | 3.509025 | 2.680594 | 3.479144 |  |
|                                                                                                               | 27 H     | 4.228070 | 2.914355 | 3.931147 | 3.197458 | 3.864593 |  |
| 28 H                                                                                                          | 4.112526 | 2.778833 | 2.619611 | 4.228323 | 5.272111 |          |  |
|                                                                                                               |          | 6        | 7        | 8        | 9        | 10       |  |
|                                                                                                               | 6 O      | 0.000000 |          |          |          |          |  |
|                                                                                                               | 7 C      | 6.463137 | 0.000000 |          |          |          |  |
|                                                                                                               | 8 O      | 6.893573 | 1.133490 | 0.000000 |          |          |  |
|                                                                                                               | 9 C      | 3.308542 | 5.478435 | 5.703334 | 0.000000 |          |  |
|                                                                                                               | 10 O     | 3.937474 | 6.527556 | 6.705115 | 1.150248 | 0.000000 |  |
|                                                                                                               | 11 C     | 3.371632 | 4.260537 | 4.209219 | 2.809229 | 3.781933 |  |
|                                                                                                               | 12 O     | 4.035583 | 4.788370 | 4.518815 | 3.783218 | 4.623883 |  |
|                                                                                                               | 13 H     | 8.415681 | 4.354978 | 5.339072 | 7.544425 | 8.382167 |  |
|                                                                                                               | 14 C     | 7.947858 | 3.798341 | 4.840134 | 7.401872 | 8.337068 |  |
|                                                                                                               | 15 C     | 7.029058 | 4.067189 | 5.188861 | 7.028738 | 7.999622 |  |
|                                                                                                               | 16 H     | 9.170407 | 3.479416 | 4.160937 | 8.383066 | 9.362990 |  |
|                                                                                                               | 17 H     | 6.737643 | 4.820284 | 5.953713 | 6.885469 | 7.784338 |  |
|                                                                                                               | 18 C     | 6.944376 | 3.785455 | 4.826291 | 7.315727 | 8.380641 |  |
|                                                                                                               | 19 H     | 6.531044 | 4.338905 | 5.320422 | 7.391052 | 8.471063 |  |
|                                                                                                               | 20 C     | 7.781140 | 3.255218 | 4.153809 | 7.790378 | 8.873814 |  |
|                                                                                                               | 21 H     | 8.158330 | 3.467512 | 4.146861 | 8.297037 | 9.411990 |  |

|  |    |   |          |          |          |          |          |
|--|----|---|----------|----------|----------|----------|----------|
|  | 22 | C | 8.357118 | 3.261043 | 4.160346 | 7.838450 | 8.845661 |
|  | 23 | S | 3.891653 | 3.032093 | 3.859832 | 4.178181 | 5.291969 |
|  | 24 | S | 6.089842 | 2.981542 | 3.793761 | 4.475130 | 5.290478 |
|  | 25 | C | 3.508352 | 4.082986 | 4.899193 | 3.232141 | 4.183345 |
|  | 26 | C | 4.497331 | 3.868145 | 4.610326 | 3.040174 | 3.868451 |
|  | 27 | H | 4.814868 | 4.855815 | 5.536240 | 3.002774 | 3.537503 |
|  | 28 | H | 3.175543 | 5.117002 | 5.950875 | 3.569480 | 4.366856 |
|  |    |   | 11       | 12       | 13       | 14       | 15       |
|  | 11 | C | 0.000000 |          |          |          |          |
|  | 12 | O | 1.146232 | 0.000000 |          |          |          |
|  | 13 | H | 7.659322 | 8.538043 | 0.000000 |          |          |
|  | 14 | C | 7.172949 | 7.987516 | 1.080323 | 0.000000 |          |
|  | 15 | C | 6.755010 | 7.590881 | 2.234518 | 1.425848 | 0.000000 |
|  | 16 | H | 7.627742 | 8.215487 | 2.686003 | 2.229671 | 3.348297 |
|  | 17 | H | 6.947088 | 7.865039 | 2.690428 | 2.238424 | 1.079523 |
|  | 18 | C | 6.485337 | 7.157272 | 3.347350 | 2.304044 | 1.428977 |
|  | 19 | H | 6.403120 | 7.015765 | 4.357359 | 3.348001 | 2.239289 |
|  | 20 | C | 6.709496 | 7.263752 | 3.351153 | 2.305893 | 2.304984 |
|  | 21 | H | 6.869438 | 7.263802 | 4.361851 | 3.349444 | 3.349827 |
|  | 22 | C | 7.130089 | 7.782313 | 2.228437 | 1.415590 | 2.304019 |
|  | 23 | S | 3.368341 | 4.229429 | 4.911152 | 4.264413 | 3.515874 |
|  | 24 | S | 4.960511 | 5.947286 | 3.204567 | 3.291662 | 3.558790 |
|  | 25 | C | 3.762290 | 4.853389 | 4.980355 | 4.669745 | 3.976635 |
|  | 26 | C | 4.069702 | 5.188987 | 4.568029 | 4.512322 | 4.228009 |
|  | 27 | H | 4.726467 | 5.861672 | 5.078095 | 5.211397 | 4.981113 |
|  | 28 | H | 4.383687 | 5.450640 | 5.572655 | 5.283793 | 4.398335 |
|  |    |   | 16       | 17       | 18       | 19       | 20       |
|  | 16 | H | 0.000000 |          |          |          |          |
|  | 17 | H | 4.356738 | 0.000000 |          |          |          |
|  | 18 | C | 3.348535 | 2.243608 | 0.000000 |          |          |
|  | 19 | H | 4.360758 | 2.699814 | 1.080603 | 0.000000 |          |
|  | 20 | C | 2.250833 | 3.347994 | 1.414244 | 2.226461 | 0.000000 |
|  | 21 | H | 2.710941 | 4.359603 | 2.228854 | 2.683703 | 1.080475 |
|  | 22 | C | 1.080366 | 3.346258 | 2.305011 | 3.350263 | 1.437963 |
|  | 23 | S | 5.300491 | 3.663318 | 3.318000 | 3.255519 | 3.955209 |
|  | 24 | S | 4.332548 | 3.745711 | 4.298960 | 4.977861 | 4.464058 |
|  | 25 | C | 6.124746 | 3.721408 | 4.364212 | 4.432192 | 5.157061 |
|  | 26 | C | 5.844057 | 4.070557 | 4.859257 | 5.203904 | 5.402602 |
|  | 27 | H | 6.646936 | 4.668499 | 5.777638 | 6.134068 | 6.364881 |
|  | 28 | H | 6.944825 | 3.901732 | 4.832815 | 4.742007 | 5.825999 |
|  |    |   | 21       | 22       | 23       | 24       | 25       |
|  | 21 | H | 0.000000 |          |          |          |          |
|  | 22 | C | 2.250519 | 0.000000 |          |          |          |
|  | 23 | S | 4.436093 | 4.483701 | 0.000000 |          |          |
|  | 24 | S | 5.272063 | 3.890626 | 3.220103 | 0.000000 |          |
|  | 25 | C | 5.856078 | 5.319613 | 1.767442 | 2.784628 | 0.000000 |
|  | 26 | C | 6.165305 | 5.209277 | 2.653952 | 1.786094 | 1.387056 |
|  | 27 | H | 7.178950 | 6.050188 | 3.676492 | 2.399353 | 2.138237 |
|  | 28 | H | 6.548901 | 6.064035 | 2.490607 | 3.694774 | 1.082907 |
|  |    |   | 26       | 27       | 28       |          |          |

|                                                                                                                |                                                   |
|----------------------------------------------------------------------------------------------------------------|---------------------------------------------------|
|                                                                                                                | 26 C 0.000000                                     |
|                                                                                                                | 27 H 1.087944 0.000000                            |
|                                                                                                                | 28 H 2.198460 2.551522 0.000000                   |
|  <p>4. -2787.696236 +36.6</p> | 1 2 3 4 5                                         |
|                                                                                                                | 1 Rh 0.000000                                     |
|                                                                                                                | 2 Cr 2.910321 0.000000                            |
|                                                                                                                | 3 C 3.188325 1.916835 0.000000                    |
|                                                                                                                | 4 O 3.899484 3.048621 1.138433 0.000000           |
|                                                                                                                | 5 C 3.860358 1.895669 3.805570 4.927125 0.000000  |
|                                                                                                                | 6 O 4.752667 3.033558 4.937278 6.051723 1.140013  |
|                                                                                                                | 7 C 4.115321 1.840768 2.508022 3.301381 2.631911  |
|                                                                                                                | 8 O 5.067000 2.985105 3.371722 3.920384 3.518274  |
|                                                                                                                | 9 C 4.662436 1.880464 2.710717 3.590781 2.595582  |
|                                                                                                                | 10 C 2.138700 1.980300 2.984511 3.909011 2.496390 |
|                                                                                                                | 11 O 2.955290 3.011392 3.965714 4.784535 3.076953 |
|                                                                                                                | 12 O 5.763676 3.020621 3.604597 4.298663 3.480359 |
|                                                                                                                | 13 H 2.946509 5.667920 6.120296 6.726455 5.992642 |
|                                                                                                                | 14 C 2.239544 5.096785 5.321161 5.840480 5.689121 |
|                                                                                                                | 15 C 2.207908 5.036341 4.781908 5.087918 6.049210 |
|                                                                                                                | 16 H 2.976331 5.035307 5.589776 6.209289 5.236116 |
|                                                                                                                | 17 H 2.915750 5.582297 5.226485 5.462053 6.643407 |
|                                                                                                                | 18 C 2.233606 4.646871 4.037909 4.159066 5.915616 |
|                                                                                                                | 19 H 2.958819 4.914689 3.877989 3.705664 6.421430 |
|                                                                                                                | 20 C 2.259029 4.446946 4.202937 4.497483 5.442774 |
|                                                                                                                | 21 H 2.979496 4.521907 4.171704 4.369545 5.544284 |
| 22 C 2.245296 4.717326 4.991968 5.521240 5.262889                                                              |                                                   |
| 23 S 2.377871 3.254799 2.890604 3.373621 4.614998                                                              |                                                   |
| 24 S 2.360508 3.276676 4.472347 5.454175 3.176674                                                              |                                                   |
| 25 C 3.026091 2.372522 2.831400 3.682071 3.386652                                                              |                                                   |
| 26 C 3.016555 2.405530 3.637057 4.661568 2.579526                                                              |                                                   |
| 27 H 4.055635 2.955417 4.382229 5.427220 2.563008                                                              |                                                   |
| 28 H 4.069715 2.924835 3.158954 3.864840 3.911640                                                              |                                                   |
|                                                                                                                | 6 7 8 9 10                                        |
| 6 O 0.000000                                                                                                   |                                                   |
| 7 C 3.492615 0.000000                                                                                          |                                                   |
| 8 O 4.173389 1.144386 0.000000                                                                                 |                                                   |
| 9 C 3.460475 2.530433 3.400688 0.000000                                                                        |                                                   |
| 10 C 3.335001 2.424000 3.245842 3.799993 0.000000                                                              |                                                   |
| 11 O 3.624674 2.890520 3.370588 4.703026 1.161126                                                              |                                                   |
| 12 O 4.140192 3.416597 4.076146 1.140170 4.926141                                                              |                                                   |
| 13 H 6.513321 6.828150 7.690373 7.381569 4.479505                                                              |                                                   |
| 14 C 6.347536 6.131317 6.951818 6.872703 3.849662                                                              |                                                   |
| 15 C 6.885841 6.139740 6.992144 6.688302 4.179214                                                              |                                                   |
| 16 H 5.698106 5.483621 6.041724 6.903226 3.183921                                                              |                                                   |
| 17 H 7.493073 6.855965 7.770765 7.073420 5.018811                                                              |                                                   |
| 18 C 6.847611 5.399487 6.114688 6.310336 3.740251                                                              |                                                   |
| 19 H 7.434899 5.569368 6.231391 6.396220 4.324837                                                              |                                                   |
| 20 C 6.265432 4.875226 5.456582 6.256936 3.024261                                                              |                                                   |
| 21 H 6.360431 4.527219 4.904213 6.268239 3.053852                                                              |                                                   |
| 22 C 5.901828 5.358936 6.020635 6.589099 3.080138                                                              |                                                   |

|  |    |   |          |          |          |          |          |
|--|----|---|----------|----------|----------|----------|----------|
|  | 23 | S | 5.624735 | 4.843092 | 5.909033 | 4.238532 | 3.870432 |
|  | 24 | S | 3.699576 | 4.859772 | 5.920259 | 4.585591 | 3.084115 |
|  | 25 | C | 4.332728 | 4.163893 | 5.294912 | 2.879192 | 3.655863 |
|  | 26 | C | 3.317705 | 4.195811 | 5.324755 | 3.125076 | 3.324634 |
|  | 27 | H | 3.013584 | 4.583241 | 5.657480 | 3.141690 | 4.041348 |
|  | 28 | H | 4.806648 | 4.551321 | 5.628315 | 2.712207 | 4.535799 |
|  |    |   | 11       | 12       | 13       | 14       | 15       |
|  | 11 | O | 0.000000 |          |          |          |          |
|  | 12 | O | 5.786791 | 0.000000 |          |          |          |
|  | 13 | H | 4.726337 | 8.455522 | 0.000000 |          |          |
|  | 14 | C | 4.130765 | 7.972559 | 1.080619 | 0.000000 |          |
|  | 15 | C | 4.706850 | 7.739416 | 2.227460 | 1.417679 | 0.000000 |
|  | 16 | H | 2.794801 | 8.039200 | 2.700394 | 2.239150 | 3.345456 |
|  | 17 | H | 5.662021 | 8.055521 | 2.680247 | 2.229860 | 1.080249 |
|  | 18 | C | 4.212337 | 7.367759 | 3.357201 | 2.313223 | 1.441004 |
|  | 19 | H | 4.879230 | 7.380409 | 4.365823 | 3.355787 | 2.252589 |
|  | 20 | C | 3.149059 | 7.370230 | 3.350005 | 2.303942 | 2.299424 |
|  | 21 | H | 2.961601 | 7.357804 | 4.359185 | 3.346613 | 3.346145 |
|  | 22 | C | 3.053454 | 7.725865 | 2.236167 | 1.422283 | 2.300883 |
|  | 23 | S | 4.960005 | 5.084893 | 4.483576 | 3.976492 | 3.213360 |
|  | 24 | S | 3.837502 | 5.543503 | 3.365548 | 3.421784 | 3.868312 |
|  | 25 | C | 4.798114 | 3.652547 | 5.316715 | 4.962188 | 4.599189 |
|  | 26 | C | 4.336530 | 3.954139 | 4.926567 | 4.766728 | 4.804299 |
|  | 27 | H | 4.956216 | 3.745088 | 5.785762 | 5.729828 | 5.859297 |
|  | 28 | H | 5.678135 | 3.172305 | 6.367490 | 6.015494 | 5.551696 |
|  |    |   | 16       | 17       | 18       | 19       | 20       |
|  | 16 | H | 0.000000 |          |          |          |          |
|  | 17 | H | 4.355466 | 0.000000 |          |          |          |
|  | 18 | C | 3.349666 | 2.253190 | 0.000000 |          |          |
|  | 19 | H | 4.361882 | 2.712495 | 1.080144 | 0.000000 |          |
|  | 20 | C | 2.243929 | 3.342981 | 1.410219 | 2.228540 | 0.000000 |
|  | 21 | H | 2.694088 | 4.357027 | 2.223263 | 2.685675 | 1.080822 |
|  | 22 | C | 1.079674 | 3.344142 | 2.309059 | 3.354936 | 1.432988 |
|  | 23 | S | 5.320980 | 3.141728 | 3.377316 | 3.458748 | 4.171170 |
|  | 24 | S | 4.071233 | 4.200286 | 4.472251 | 5.214704 | 4.430175 |
|  | 25 | C | 5.847042 | 4.681743 | 4.728600 | 4.927765 | 5.134901 |
|  | 26 | C | 5.388441 | 5.017216 | 5.108555 | 5.562920 | 5.230723 |
|  | 27 | H | 6.204897 | 6.048115 | 6.185049 | 6.639428 | 6.236345 |
|  | 28 | H | 6.910921 | 5.536678 | 5.618299 | 5.671340 | 6.095820 |
|  |    |   | 21       | 22       | 23       | 24       | 25       |
|  | 21 | H | 0.000000 |          |          |          |          |
|  | 22 | C | 2.240410 | 0.000000 |          |          |          |
|  | 23 | S | 4.818538 | 4.476070 | 0.000000 |          |          |
|  | 24 | S | 5.131736 | 3.787330 | 3.138797 | 0.000000 |          |
|  | 25 | C | 5.628462 | 5.251565 | 1.758690 | 2.734463 | 0.000000 |
|  | 26 | C | 5.755178 | 5.005666 | 2.711560 | 1.756584 | 1.378414 |
|  | 27 | H | 6.709714 | 5.938460 | 3.700576 | 2.449028 | 2.140042 |
|  | 28 | H | 6.521649 | 6.308344 | 2.457428 | 3.719234 | 1.086417 |
|  |    |   | 26       | 27       | 28       |          |          |
|  | 26 | C | 0.000000 |          |          |          |          |

|  |      |          |          |          |
|--|------|----------|----------|----------|
|  | 27 H | 1.087281 | 0.000000 |          |
|  | 28 H | 2.141364 | 2.467706 | 0.000000 |

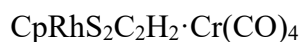

|                                                                                                              |          |          |          |          |          |          |
|--------------------------------------------------------------------------------------------------------------|----------|----------|----------|----------|----------|----------|
| 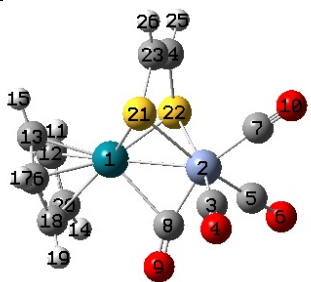 <p>1. -2674.508827 0.0</p> |          | 1        | 2        | 3        | 4        | 5        |
|                                                                                                              | 1 Rh     | 0.000000 |          |          |          |          |
|                                                                                                              | 2 Cr     | 2.615283 | 0.000000 |          |          |          |
|                                                                                                              | 3 C      | 3.770455 | 1.831681 | 0.000000 |          |          |
|                                                                                                              | 4 O      | 4.699228 | 2.978458 | 1.147115 | 0.000000 |          |
|                                                                                                              | 5 C      | 3.899220 | 1.836253 | 2.777800 | 3.734631 | 0.000000 |
|                                                                                                              | 6 O      | 4.870956 | 2.982115 | 3.734241 | 4.547255 | 1.146077 |
|                                                                                                              | 7 C      | 4.265403 | 1.898624 | 2.540330 | 3.428226 | 2.509528 |
|                                                                                                              | 8 C      | 2.346845 | 1.862973 | 2.415246 | 3.265285 | 2.376732 |
|                                                                                                              | 9 O      | 3.124174 | 2.987517 | 3.155623 | 3.732833 | 3.077695 |
|                                                                                                              | 10 O     | 5.348605 | 3.036978 | 3.411953 | 4.090606 | 3.378452 |
|                                                                                                              | 11 H     | 2.896111 | 5.148717 | 6.585638 | 7.556206 | 5.894837 |
|                                                                                                              | 12 C     | 2.186392 | 4.680039 | 5.910464 | 6.800160 | 5.600137 |
|                                                                                                              | 13 C     | 2.184857 | 4.756344 | 5.744375 | 6.526796 | 6.059715 |
|                                                                                                              | 14 H     | 2.956211 | 4.716845 | 5.737836 | 6.542828 | 5.015582 |
|                                                                                                              | 15 H     | 2.912788 | 5.303016 | 6.320791 | 7.102236 | 6.722006 |
|                                                                                                              | 16 C     | 2.198332 | 4.534685 | 5.094058 | 5.693750 | 5.887480 |
|                                                                                                              | 17 H     | 2.920723 | 4.908302 | 5.147537 | 5.574141 | 6.415492 |
|                                                                                                              | 18 C     | 2.239817 | 4.345560 | 4.891297 | 5.496869 | 5.331614 |
|                                                                                                              | 19 H     | 2.964331 | 4.549396 | 4.736974 | 5.164302 | 5.393054 |
|                                                                                                              | 20 C     | 2.210770 | 4.411219 | 5.404161 | 6.202944 | 5.104209 |
|                                                                                                              | 21 S     | 2.349212 | 2.452980 | 3.132551 | 3.934672 | 4.267594 |
| 22 S                                                                                                         | 2.353399 | 2.474462 | 4.282181 | 5.418921 | 3.162592 |          |
| 23 C                                                                                                         | 3.200237 | 3.298875 | 4.465778 | 5.379993 | 4.808133 |          |
| 24 C                                                                                                         | 3.200689 | 3.306618 | 4.867046 | 5.919502 | 4.418714 |          |
| 25 H                                                                                                         | 4.174763 | 4.256933 | 5.849774 | 6.905885 | 5.133525 |          |
| 26 H                                                                                                         | 4.173611 | 4.244699 | 5.195746 | 5.994588 | 5.767918 |          |
|                                                                                                              |          | 6        | 7        | 8        | 9        | 10       |
| 6 O                                                                                                          | 0.000000 |          |          |          |          |          |
| 7 C                                                                                                          | 3.384434 | 0.000000 |          |          |          |          |
| 8 C                                                                                                          | 3.223751 | 3.693985 | 0.000000 |          |          |          |
| 9 O                                                                                                          | 3.632240 | 4.741457 | 1.160157 | 0.000000 |          |          |
| 10 O                                                                                                         | 4.036630 | 1.138963 | 4.810235 | 5.825158 | 0.000000 |          |
| 11 H                                                                                                         | 6.559758 | 6.590006 | 4.725023 | 5.134359 | 7.573883 |          |
| 12 C                                                                                                         | 6.359867 | 6.275352 | 4.067457 | 4.427120 | 7.320298 |          |
| 13 C                                                                                                         | 6.981212 | 6.249463 | 4.359936 | 4.837998 | 7.257002 |          |
| 14 H                                                                                                         | 5.493000 | 6.522880 | 3.392071 | 3.195395 | 7.633501 |          |
| 15 H                                                                                                         | 7.683785 | 6.571098 | 5.209914 | 5.802821 | 7.486751 |          |
| 16 C                                                                                                         | 6.836510 | 6.171671 | 3.817349 | 4.119223 | 7.227807 |          |
| 17 H                                                                                                         | 7.424599 | 6.413714 | 4.323952 | 4.635321 | 7.415373 |          |
| 18 C                                                                                                         | 6.136406 | 6.180056 | 3.108882 | 3.082209 | 7.302046 |          |
| 19 H                                                                                                         | 6.134432 | 6.405922 | 3.041481 | 2.685814 | 7.528906 |          |
| 20 C                                                                                                         | 5.778051 | 6.216915 | 3.268804 | 3.307654 | 7.331892 |          |
| 21 S                                                                                                         | 5.405415 | 3.193972 | 3.436268 | 4.478373 | 4.041133 |          |
| 22 S                                                                                                         | 3.963956 | 3.347671 | 3.270040 | 4.253438 | 4.231861 |          |

|                                                                                     |      |          |          |          |          |          |
|-------------------------------------------------------------------------------------|------|----------|----------|----------|----------|----------|
|                                                                                     | 23 C | 5.839936 | 3.420933 | 4.616968 | 5.730779 | 3.992682 |
|                                                                                     | 24 C | 5.309540 | 3.486526 | 4.563607 | 5.654832 | 4.080460 |
|                                                                                     | 25 H | 5.896228 | 4.172730 | 5.535911 | 6.606236 | 4.562945 |
|                                                                                     | 26 H | 6.793474 | 4.066332 | 5.619751 | 6.730337 | 4.410491 |
|                                                                                     |      | 11       | 12       | 13       | 14       | 15       |
|                                                                                     | 11 H | 0.000000 |          |          |          |          |
|                                                                                     | 12 C | 1.080706 | 0.000000 |          |          |          |
|                                                                                     | 13 C | 2.230977 | 1.420243 | 0.000000 |          |          |
|                                                                                     | 14 H | 2.697315 | 2.243465 | 3.356886 | 0.000000 |          |
|                                                                                     | 15 H | 2.691455 | 2.236261 | 1.079667 | 4.367804 | 0.000000 |
|                                                                                     | 16 C | 3.346428 | 2.300808 | 1.437288 | 3.345927 | 2.252266 |
|                                                                                     | 17 H | 4.356975 | 3.344518 | 2.246831 | 4.356179 | 2.709281 |
|                                                                                     | 18 C | 3.348131 | 2.304392 | 2.312944 | 2.241440 | 3.355907 |
|                                                                                     | 19 H | 4.357421 | 3.347667 | 3.357331 | 2.694974 | 4.367266 |
|                                                                                     | 20 C | 2.237951 | 1.428897 | 2.313916 | 1.079905 | 3.358060 |
|                                                                                     | 21 S | 4.812527 | 4.239727 | 3.613909 | 5.293437 | 3.749229 |
|                                                                                     | 22 S | 3.454737 | 3.484299 | 3.913133 | 4.143806 | 4.263047 |
|                                                                                     | 23 C | 4.779397 | 4.582847 | 4.113721 | 5.984262 | 3.921440 |
|                                                                                     | 24 C | 4.231563 | 4.293009 | 4.230468 | 5.571356 | 4.143602 |
|                                                                                     | 25 H | 4.668846 | 4.945459 | 4.974901 | 6.289469 | 4.760118 |
|                                                                                     | 26 H | 5.595412 | 5.423245 | 4.782331 | 6.981650 | 4.382556 |
|                                                                                     |      | 16       | 17       | 18       | 19       | 20       |
|                                                                                     | 16 C | 0.000000 |          |          |          |          |
|                                                                                     | 17 H | 1.080485 | 0.000000 |          |          |          |
|                                                                                     | 18 C | 1.415174 | 2.227702 | 0.000000 |          |          |
|                                                                                     | 19 H | 2.228891 | 2.684082 | 1.080090 | 0.000000 |          |
|                                                                                     | 20 C | 2.302631 | 3.346538 | 1.427627 | 2.236529 | 0.000000 |
|                                                                                     | 21 S | 3.524197 | 3.563863 | 4.138250 | 4.632714 | 4.518169 |
|                                                                                     | 22 S | 4.461982 | 5.169494 | 4.444437 | 5.123248 | 3.841077 |
|                                                                                     | 23 C | 4.597045 | 4.810674 | 5.286740 | 5.989626 | 5.263860 |
|                                                                                     | 24 C | 4.940037 | 5.411015 | 5.393403 | 6.161279 | 5.021219 |
|                                                                                     | 25 H | 5.851506 | 6.354526 | 6.317837 | 7.135821 | 5.802815 |
|                                                                                     | 26 H | 5.285118 | 5.343334 | 6.141071 | 6.847724 | 6.202824 |
|                                                                                     |      | 21       | 22       | 23       | 24       | 25       |
|                                                                                     | 21 S | 0.000000 |          |          |          |          |
|                                                                                     | 22 S | 3.025772 | 0.000000 |          |          |          |
|                                                                                     | 23 C | 1.778932 | 2.678371 | 0.000000 |          |          |
|                                                                                     | 24 C | 2.679646 | 1.777444 | 1.326980 | 0.000000 |          |
|                                                                                     | 25 H | 3.717997 | 2.466344 | 2.137039 | 1.084438 | 0.000000 |
|                                                                                     | 26 H | 2.466514 | 3.717043 | 1.084380 | 2.137977 | 2.556933 |
|                                                                                     |      | 26       |          |          |          |          |
|                                                                                     | 26 H | 0.000000 |          |          |          |          |
|                                                                                     |      | 1        | 2        | 3        | 4        | 5        |
|                                                                                     | 1 Rh | 0.000000 |          |          |          |          |
|                                                                                     | 2 Cr | 2.789984 | 0.000000 |          |          |          |
|                                                                                     | 3 C  | 4.599541 | 1.840072 | 0.000000 |          |          |
|                                                                                     | 4 C  | 2.014802 | 2.035592 | 3.719306 | 0.000000 |          |
|                                                                                     | 5 O  | 2.901159 | 3.059302 | 4.538023 | 1.171403 | 0.000000 |
|                                                                                     | 6 O  | 5.737615 | 2.985056 | 1.145095 | 4.820314 | 5.559897 |
|                                                                                     | 7 C  | 3.753897 | 1.835195 | 2.395476 | 2.450961 | 3.003265 |
| 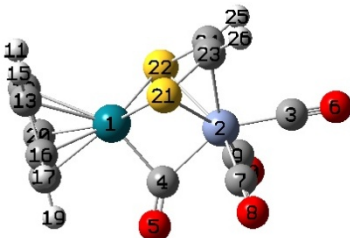 |      |          |          |          |          |          |

2. -2674.497551 +7.1

|      |          |          |          |          |          |
|------|----------|----------|----------|----------|----------|
| 8 O  | 4.615269 | 2.978017 | 3.266798 | 3.248695 | 3.496150 |
| 9 C  | 3.754575 | 1.835142 | 2.395523 | 2.451061 | 3.003197 |
| 10 O | 4.616177 | 2.977968 | 3.266851 | 3.248836 | 3.496079 |
| 11 H | 3.177026 | 5.622934 | 7.246828 | 5.036279 | 5.697076 |
| 12 C | 2.440589 | 5.125793 | 6.864418 | 4.260730 | 4.832591 |
| 13 C | 2.440589 | 5.125698 | 6.864181 | 4.260712 | 4.832590 |
| 14 H | 2.944045 | 5.112038 | 6.822616 | 3.829542 | 4.029262 |
| 15 H | 3.177021 | 5.622759 | 7.246386 | 5.036247 | 5.697073 |
| 16 C | 2.216159 | 4.760564 | 6.555700 | 3.466070 | 3.785307 |
| 17 H | 2.943975 | 5.111644 | 6.821770 | 3.829396 | 4.029182 |
| 18 C | 2.196064 | 4.660442 | 6.495669 | 3.013066 | 3.086029 |
| 19 H | 2.844918 | 4.834136 | 6.610069 | 2.914364 | 2.571455 |
| 20 C | 2.216151 | 4.760721 | 6.556096 | 3.466096 | 3.785304 |
| 21 S | 2.353131 | 2.527014 | 3.784267 | 3.090256 | 4.118895 |
| 22 S | 2.353129 | 2.526175 | 3.783901 | 3.089638 | 4.118348 |
| 23 C | 3.234153 | 2.222580 | 2.828736 | 3.745519 | 4.892508 |
| 24 C | 3.234188 | 2.222438 | 2.828802 | 3.745493 | 4.892512 |
| 25 H | 4.275254 | 2.938130 | 2.926680 | 4.633622 | 5.737768 |
| 26 H | 4.275222 | 2.938295 | 2.926504 | 4.633657 | 5.737760 |
|      | 6        | 7        | 8        | 9        | 10       |
| 6 O  | 0.000000 |          |          |          |          |
| 7 C  | 3.253560 | 0.000000 |          |          |          |
| 8 O  | 3.890890 | 1.143109 | 0.000000 |          |          |
| 9 C  | 3.253685 | 2.864950 | 3.838380 | 0.000000 |          |
| 10 O | 3.891054 | 3.838396 | 4.686475 | 1.143113 | 0.000000 |
| 11 H | 8.309488 | 6.884335 | 7.771447 | 6.307568 | 6.924535 |
| 12 C | 7.973898 | 6.186198 | 6.994776 | 5.859097 | 6.517811 |
| 13 C | 7.973594 | 5.857926 | 6.516143 | 6.186957 | 6.995931 |
| 14 H | 7.916647 | 6.206038 | 7.038545 | 5.106865 | 5.403739 |
| 15 H | 8.308917 | 6.306212 | 6.922622 | 6.884960 | 7.772450 |
| 16 C | 7.684573 | 5.125144 | 5.629478 | 5.729427 | 6.513118 |
| 17 H | 7.915589 | 5.105241 | 5.401493 | 6.206110 | 7.038870 |
| 18 C | 7.637709 | 5.172728 | 5.757447 | 5.173501 | 5.758596 |
| 19 H | 7.726366 | 5.097211 | 5.559426 | 5.097825 | 5.560363 |
| 20 C | 7.685079 | 5.728929 | 6.512302 | 5.126375 | 5.631217 |
| 21 S | 4.768216 | 3.008749 | 3.735312 | 4.290721 | 5.409239 |
| 22 S | 4.768060 | 4.289780 | 5.408247 | 3.008994 | 3.735962 |
| 23 C | 3.662066 | 3.314715 | 4.248502 | 3.864468 | 4.950335 |
| 24 C | 3.662225 | 3.863950 | 4.949709 | 3.315453 | 4.249467 |
| 25 H | 3.470329 | 4.537987 | 5.605838 | 3.669709 | 4.446088 |
| 26 H | 3.469956 | 3.669010 | 4.445112 | 4.538323 | 5.606237 |
|      | 11       | 12       | 13       | 14       | 15       |
| 11 H | 0.000000 |          |          |          |          |
| 12 C | 1.080937 | 0.000000 |          |          |          |
| 13 C | 2.199474 | 1.379286 | 0.000000 |          |          |
| 14 H | 2.712900 | 2.262213 | 3.332926 | 0.000000 |          |
| 15 H | 2.660260 | 2.199474 | 1.080939 | 4.349069 | 0.000000 |
| 16 C | 3.343961 | 2.295364 | 1.454402 | 3.331383 | 2.258325 |
| 17 H | 4.349068 | 3.332924 | 2.262220 | 4.343382 | 2.712918 |
| 18 C | 3.360045 | 2.319956 | 2.319965 | 2.230311 | 3.360059 |

|  |      |          |          |          |          |          |
|--|------|----------|----------|----------|----------|----------|
|  | 19 H | 4.372679 | 3.366365 | 3.366376 | 2.689771 | 4.372698 |
|  | 20 C | 2.258320 | 1.454405 | 2.295374 | 1.080712 | 3.343971 |
|  | 21 S | 4.756898 | 4.219721 | 3.647230 | 5.276696 | 3.733833 |
|  | 22 S | 3.734980 | 3.648135 | 4.220282 | 3.696955 | 4.757407 |
|  | 23 C | 5.280854 | 5.033513 | 4.841122 | 5.866468 | 4.921701 |
|  | 24 C | 4.922219 | 4.841469 | 5.033485 | 5.332943 | 5.280652 |
|  | 25 H | 5.701045 | 5.749998 | 6.040950 | 6.124276 | 6.254475 |
|  | 26 H | 6.254665 | 6.040945 | 5.749585 | 6.950870 | 5.700438 |
|  |      | 16       | 17       | 18       | 19       | 20       |
|  | 16 C | 0.000000 |          |          |          |          |
|  | 17 H | 1.080711 | 0.000000 |          |          |          |
|  | 18 C | 1.418285 | 2.230322 | 0.000000 |          |          |
|  | 19 H | 2.232433 | 2.689793 | 1.079908 | 0.000000 |          |
|  | 20 C | 2.286277 | 3.331383 | 1.418274 | 2.232415 | 0.000000 |
|  | 21 S | 3.554878 | 3.696009 | 4.219247 | 4.769398 | 4.483570 |
|  | 22 S | 4.483825 | 5.276678 | 4.219579 | 4.769544 | 3.555606 |
|  | 23 C | 4.998113 | 5.332175 | 5.399968 | 5.946331 | 5.303776 |
|  | 24 C | 5.303649 | 5.866036 | 5.400115 | 5.946466 | 4.998552 |
|  | 25 H | 6.370869 | 6.950445 | 6.407622 | 6.928635 | 5.907732 |
|  | 26 H | 5.907212 | 6.123382 | 6.407421 | 6.928443 | 6.370969 |
|  |      | 21       | 22       | 23       | 24       | 25       |
|  | 21 S | 0.000000 |          |          |          |          |
|  | 22 S | 3.264609 | 0.000000 |          |          |          |
|  | 23 C | 1.744624 | 2.745179 | 0.000000 |          |          |
|  | 24 C | 2.745190 | 1.744648 | 1.376055 | 0.000000 |          |
|  | 25 H | 3.745274 | 2.429316 | 2.145231 | 1.084906 | 0.000000 |
|  | 26 H | 2.429319 | 3.745242 | 1.084905 | 2.145187 | 2.488927 |
|  |      | 26       |          |          |          |          |
|  | 26 H | 0.000000 |          |          |          |          |
|  |      | 1        | 2        | 3        | 4        | 5        |
|  | 1 Rh | 0.000000 |          |          |          |          |
|  | 2 Cr | 3.848266 | 0.000000 |          |          |          |
|  | 3 C  | 4.743860 | 1.836276 | 0.000000 |          |          |
|  | 4 C  | 5.345879 | 1.821438 | 2.711539 | 0.000000 |          |
|  | 5 O  | 6.369248 | 2.971555 | 3.665261 | 1.150570 | 0.000000 |
|  | 6 O  | 5.517833 | 2.984573 | 1.148793 | 3.667856 | 4.470501 |
|  | 7 C  | 3.399435 | 1.879293 | 2.523002 | 2.541670 | 3.426305 |
|  | 8 O  | 3.717905 | 3.021317 | 3.358902 | 3.398875 | 4.065681 |
|  | 9 C  | 5.249570 | 1.872193 | 2.503165 | 2.500350 | 3.379227 |
|  | 10 O | 6.272959 | 3.016266 | 3.363178 | 3.348607 | 3.999500 |
|  | 11 H | 2.891981 | 6.658002 | 7.540776 | 8.154081 | 9.145851 |
|  | 12 C | 2.164609 | 5.996693 | 6.726918 | 7.504562 | 8.509742 |
|  | 13 C | 2.193370 | 5.583379 | 5.983892 | 7.244092 | 8.323073 |
|  | 14 H | 2.917157 | 6.325631 | 7.200354 | 7.425358 | 8.239065 |
|  | 15 H | 2.930182 | 5.939268 | 6.247863 | 7.694091 | 8.812743 |
|  | 16 C | 2.178331 | 5.044687 | 5.186198 | 6.595834 | 7.637496 |
|  | 17 H | 2.909619 | 4.938418 | 4.699457 | 6.491216 | 7.540093 |
|  | 18 C | 2.162288 | 5.187217 | 5.569683 | 6.484516 | 7.414963 |
|  | 19 H | 2.879432 | 5.196002 | 5.450546 | 6.264827 | 7.098816 |
|  | 20 C | 2.184225 | 5.805549 | 6.529182 | 7.095169 | 8.006629 |

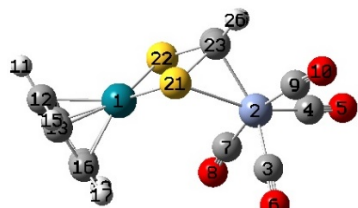

3. -2674.485493 +14.6



|  |    |   |          |          |          |          |          |  |  |
|--|----|---|----------|----------|----------|----------|----------|--|--|
|  | 21 | S | 2.291492 | 2.627569 | 3.535041 | 4.389655 | 5.515654 |  |  |
|  | 22 | S | 2.222518 | 3.538312 | 5.047908 | 4.430310 | 5.225669 |  |  |
|  | 23 | C | 3.217376 | 2.162773 | 3.764649 | 3.458129 | 4.452654 |  |  |
|  | 24 | C | 3.167704 | 2.440297 | 4.230304 | 3.239296 | 4.071819 |  |  |
|  | 25 | H | 4.188014 | 3.032436 | 4.863053 | 3.250464 | 3.821345 |  |  |
|  | 26 | H | 4.204130 | 2.753365 | 4.235747 | 3.800792 | 4.693870 |  |  |
|  |    |   | 6        | 7        | 8        | 9        | 10       |  |  |
|  | 6  | O | 0.000000 |          |          |          |          |  |  |
|  | 7  | C | 3.396059 | 0.000000 |          |          |          |  |  |
|  | 8  | O | 4.001606 | 1.146494 | 0.000000 |          |          |  |  |
|  | 9  | C | 3.387549 | 3.726652 | 4.850618 | 0.000000 |          |  |  |
|  | 10 | O | 4.027285 | 4.856192 | 5.968284 | 1.146583 | 0.000000 |  |  |
|  | 11 | H | 8.222522 | 6.249556 | 6.386183 | 7.832570 | 8.732627 |  |  |
|  | 12 | C | 7.349436 | 5.430208 | 5.497543 | 7.299104 | 8.257207 |  |  |
|  | 13 | C | 6.454527 | 5.175961 | 5.343636 | 6.760442 | 7.669709 |  |  |
|  | 14 | H | 7.891377 | 5.226106 | 4.921158 | 7.945732 | 9.021105 |  |  |
|  | 15 | H | 6.656136 | 5.825675 | 6.131918 | 6.858809 | 7.654493 |  |  |
|  | 16 | C | 5.552374 | 4.306793 | 4.297595 | 6.430930 | 7.420305 |  |  |
|  | 17 | H | 4.867684 | 4.273171 | 4.291080 | 6.227479 | 7.172201 |  |  |
|  | 18 | C | 6.054658 | 4.037058 | 3.743484 | 6.820513 | 7.899864 |  |  |
|  | 19 | H | 5.875785 | 3.734446 | 3.159469 | 6.950148 | 8.064636 |  |  |
|  | 20 | C | 7.157433 | 4.826207 | 4.633907 | 7.366046 | 8.422259 |  |  |
|  | 21 | S | 4.382897 | 3.391663 | 4.276593 | 3.351945 | 4.220775 |  |  |
|  | 22 | S | 6.071184 | 3.108069 | 3.486456 | 4.977118 | 6.009897 |  |  |
|  | 23 | C | 4.841924 | 3.330584 | 4.353704 | 2.665139 | 3.523817 |  |  |
|  | 24 | C | 5.360138 | 2.947679 | 3.789129 | 3.470460 | 4.418079 |  |  |
|  | 25 | H | 6.010701 | 3.585803 | 4.368091 | 3.783345 | 4.597181 |  |  |
|  | 26 | H | 5.271188 | 4.240201 | 5.315891 | 2.478717 | 3.022235 |  |  |
|  |    |   | 11       | 12       | 13       | 14       | 15       |  |  |
|  | 11 | H | 0.000000 |          |          |          |          |  |  |
|  | 12 | C | 1.080676 | 0.000000 |          |          |          |  |  |
|  | 13 | C | 2.240960 | 1.431325 | 0.000000 |          |          |  |  |
|  | 14 | H | 2.698249 | 2.242273 | 3.364240 | 0.000000 |          |  |  |
|  | 15 | H | 2.695519 | 2.242482 | 1.080022 | 4.372603 | 0.000000 |  |  |
|  | 16 | C | 3.343169 | 2.300306 | 1.417459 | 3.360833 | 2.233882 |  |  |
|  | 17 | H | 4.356884 | 3.347012 | 2.234144 | 4.368025 | 2.697757 |  |  |
|  | 18 | C | 3.341526 | 2.297485 | 2.309731 | 2.236326 | 3.355857 |  |  |
|  | 19 | H | 4.354868 | 3.343782 | 3.351236 | 2.697850 | 4.363710 |  |  |
|  | 20 | C | 2.239443 | 1.428491 | 2.320709 | 1.079908 | 3.362975 |  |  |
|  | 21 | S | 4.559370 | 4.063047 | 3.532260 | 5.195137 | 3.629925 |  |  |
|  | 22 | S | 4.240372 | 3.859630 | 4.356696 | 3.523045 | 5.064087 |  |  |
|  | 23 | C | 5.496634 | 5.147952 | 4.988112 | 5.790769 | 5.208841 |  |  |
|  | 24 | C | 5.470479 | 5.114553 | 5.263197 | 5.209277 | 5.726847 |  |  |
|  | 25 | H | 6.321940 | 6.047393 | 6.304341 | 5.932244 | 6.775169 |  |  |
|  | 26 | H | 6.249165 | 6.008339 | 5.808177 | 6.781344 | 5.879329 |  |  |
|  |    |   | 16       | 17       | 18       | 19       | 20       |  |  |
|  | 16 | C | 0.000000 |          |          |          |          |  |  |
|  | 17 | H | 1.080399 | 0.000000 |          |          |          |  |  |
|  | 18 | C | 1.436889 | 2.244966 | 0.000000 |          |          |  |  |
|  | 19 | H | 2.245028 | 2.694834 | 1.080972 | 0.000000 |          |  |  |

|  |      |          |          |          |          |          |
|--|------|----------|----------|----------|----------|----------|
|  | 20 C | 2.315607 | 3.356678 | 1.420794 | 2.235991 | 0.000000 |
|  | 21 S | 3.591321 | 3.739489 | 4.166695 | 4.719040 | 4.450913 |
|  | 22 S | 4.264481 | 4.913352 | 3.709546 | 3.969531 | 3.457815 |
|  | 23 C | 5.012536 | 5.254237 | 5.208050 | 5.588433 | 5.317877 |
|  | 24 C | 5.164434 | 5.554076 | 4.970604 | 5.200039 | 4.969770 |
|  | 25 H | 6.211824 | 6.611521 | 5.911384 | 6.060969 | 5.836124 |
|  | 26 H | 5.945401 | 6.135755 | 6.243230 | 6.656571 | 6.308349 |
|  |      | 21       | 22       | 23       | 24       | 25       |
|  | 21 S | 0.000000 |          |          |          |          |
|  | 22 S | 3.142709 | 0.000000 |          |          |          |
|  | 23 C | 1.745750 | 2.726456 | 0.000000 |          |          |
|  | 24 C | 2.681580 | 1.752571 | 1.379673 | 0.000000 |          |
|  | 25 H | 3.699761 | 2.414810 | 2.148463 | 1.085727 | 0.000000 |
|  | 26 H | 2.445950 | 3.681521 | 1.082627 | 2.173380 | 2.538826 |
|  |      | 26       |          |          |          |          |
|  | 26 H | 0.000000 |          |          |          |          |

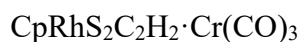

|                                                                                                               |          |          |          |          |          |          |  |
|---------------------------------------------------------------------------------------------------------------|----------|----------|----------|----------|----------|----------|--|
| 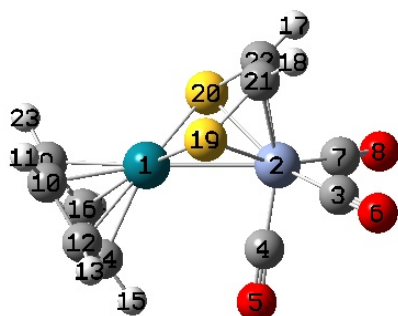 <p>1. -2561.285037 0.0</p> |          | 1        | 2        | 3        | 4        | 5        |  |
|                                                                                                               | 1 Rh     | 0.000000 |          |          |          |          |  |
|                                                                                                               | 2 Cr     | 2.713557 | 0.000000 |          |          |          |  |
|                                                                                                               | 3 C      | 3.031149 | 1.828880 | 0.000000 |          |          |  |
|                                                                                                               | 4 O      | 3.724080 | 2.982343 | 1.153538 | 0.000000 |          |  |
|                                                                                                               | 5 C      | 4.211406 | 1.840812 | 2.571763 | 3.470468 | 0.000000 |  |
|                                                                                                               | 6 O      | 5.261197 | 2.988772 | 3.481835 | 4.183730 | 1.148014 |  |
|                                                                                                               | 7 C      | 4.211216 | 1.840808 | 2.571722 | 3.470451 | 2.591429 |  |
|                                                                                                               | 8 O      | 5.260942 | 2.988766 | 3.481770 | 4.183688 | 3.491080 |  |
|                                                                                                               | 9 H      | 2.911971 | 5.429105 | 5.661857 | 6.107486 | 6.565326 |  |
|                                                                                                               | 10 C     | 2.181071 | 4.825230 | 4.839798 | 5.206751 | 6.085971 |  |
|                                                                                                               | 11 C     | 2.181067 | 4.825155 | 4.839753 | 5.206738 | 6.381392 |  |
|                                                                                                               | 12 H     | 2.926776 | 4.707525 | 4.197726 | 4.279935 | 5.395335 |  |
|                                                                                                               | 13 H     | 2.911947 | 5.428960 | 5.661777 | 6.107464 | 7.076536 |  |
|                                                                                                               | 14 C     | 2.187608 | 4.400737 | 3.967929 | 4.126505 | 5.961538 |  |
|                                                                                                               | 15 H     | 2.926790 | 4.707323 | 4.197610 | 4.279929 | 6.355586 |  |
|                                                                                                               | 16 C     | 2.213647 | 4.143679 | 3.344294 | 3.310465 | 5.378686 |  |
|                                                                                                               | 17 H     | 2.934995 | 4.198667 | 2.954851 | 2.577796 | 5.237122 |  |
|                                                                                                               | 18 C     | 2.187595 | 4.400849 | 3.967995 | 4.126510 | 5.438417 |  |
|                                                                                                               | 19 S     | 2.278510 | 2.413340 | 3.485497 | 4.430796 | 4.198594 |  |
|                                                                                                               | 20 S     | 2.278505 | 2.413376 | 3.485314 | 4.430519 | 3.059377 |  |
|                                                                                                               | 21 C     | 3.189406 | 2.172353 | 3.899483 | 5.028121 | 3.426211 |  |
|                                                                                                               | 22 C     | 3.189395 | 2.172342 | 3.899388 | 5.027992 | 2.859222 |  |
| 23 H                                                                                                          | 4.228117 | 2.929813 | 4.648468 | 5.767499 | 3.003618 |          |  |
| 24 H                                                                                                          | 4.228132 | 2.929832 | 4.648617 | 5.767707 | 3.940878 |          |  |
|                                                                                                               |          | 6        | 7        | 8        | 9        | 10       |  |
| 6 O                                                                                                           | 0.000000 |          |          |          |          |          |  |
| 7 C                                                                                                           | 3.491075 | 0.000000 |          |          |          |          |  |
| 8 O                                                                                                           | 4.194476 | 1.148013 | 0.000000 |          |          |          |  |
| 9 H                                                                                                           | 7.424657 | 7.076459 | 8.149325 | 0.000000 |          |          |  |
| 10 C                                                                                                          | 7.009953 | 6.381207 | 7.422732 | 1.080170 | 0.000000 |          |  |

|  |    |   |          |          |          |          |          |
|--|----|---|----------|----------|----------|----------|----------|
|  | 11 | C | 7.423027 | 6.085542 | 7.009369 | 2.234886 | 1.421821 |
|  | 12 | H | 6.082490 | 6.355645 | 7.433819 | 2.703809 | 2.244795 |
|  | 13 | H | 8.149497 | 6.564794 | 7.423950 | 2.692258 | 2.234870 |
|  | 14 | C | 7.009550 | 5.437919 | 6.282694 | 3.352718 | 2.307843 |
|  | 15 | H | 7.433824 | 5.394668 | 6.081606 | 4.363212 | 3.351462 |
|  | 16 | C | 6.308233 | 5.378401 | 6.307823 | 3.355335 | 2.311844 |
|  | 17 | H | 6.088939 | 5.236853 | 6.088545 | 4.365962 | 3.355861 |
|  | 18 | C | 6.283362 | 5.961433 | 7.009351 | 2.245645 | 1.432833 |
|  | 19 | S | 5.329497 | 3.059194 | 3.875376 | 4.789116 | 4.198524 |
|  | 20 | S | 3.875601 | 4.198696 | 5.329623 | 3.787605 | 3.618206 |
|  | 21 | C | 4.416473 | 2.859382 | 3.706547 | 5.471263 | 5.120341 |
|  | 22 | C | 3.706343 | 3.426421 | 4.416752 | 5.121783 | 4.925730 |
|  | 23 | H | 3.561692 | 3.941192 | 4.819223 | 5.937378 | 5.851876 |
|  | 24 | H | 4.818782 | 3.003882 | 3.562057 | 6.481801 | 6.149401 |
|  |    |   | 11       | 12       | 13       | 14       | 15       |
|  | 11 | C | 0.000000 |          |          |          |          |
|  | 12 | H | 3.351458 | 0.000000 |          |          |          |
|  | 13 | H | 1.080171 | 4.363204 | 0.000000 |          |          |
|  | 14 | C | 1.432826 | 3.345814 | 2.245648 | 0.000000 |          |
|  | 15 | H | 2.244785 | 4.355822 | 2.703811 | 1.080319 | 0.000000 |
|  | 16 | C | 2.311836 | 2.234860 | 3.355333 | 1.422866 | 2.234866 |
|  | 17 | H | 3.355842 | 2.691021 | 4.365945 | 2.235258 | 2.690987 |
|  | 18 | C | 2.307836 | 1.080319 | 3.352707 | 2.302065 | 3.345815 |
|  | 19 | S | 3.618070 | 5.185239 | 3.787366 | 3.512998 | 3.603752 |
|  | 20 | S | 4.198626 | 3.603722 | 4.789232 | 4.437022 | 5.185216 |
|  | 21 | C | 4.925679 | 5.795067 | 5.121665 | 4.993839 | 5.252811 |
|  | 22 | C | 5.120366 | 5.252806 | 5.471271 | 5.301359 | 5.795038 |
|  | 23 | H | 6.149447 | 6.026765 | 6.481844 | 6.367190 | 6.874797 |
|  | 24 | H | 5.851804 | 6.874836 | 5.937219 | 5.895663 | 6.026780 |
|  |    |   | 16       | 17       | 18       | 19       | 20       |
|  | 16 | C | 0.000000 |          |          |          |          |
|  | 17 | H | 1.080364 | 0.000000 |          |          |          |
|  | 18 | C | 1.422864 | 2.235283 | 0.000000 |          |          |
|  | 19 | S | 4.072842 | 4.550389 | 4.437020 | 0.000000 |          |
|  | 20 | S | 4.072770 | 4.550262 | 3.512994 | 3.191054 | 0.000000 |
|  | 21 | C | 5.248606 | 5.663725 | 5.301371 | 1.742949 | 2.725189 |
|  | 22 | C | 5.248571 | 5.663666 | 4.993834 | 2.725167 | 1.742956 |
|  | 23 | H | 6.239107 | 6.608494 | 5.895654 | 3.733909 | 2.434488 |
|  | 24 | H | 6.239162 | 6.608588 | 6.367205 | 2.434493 | 3.733929 |
|  |    |   | 21       | 22       | 23       | 24       |          |
|  | 21 | C | 0.000000 |          |          |          |          |
|  | 22 | C | 1.375317 | 0.000000 |          |          |          |
|  | 23 | H | 2.151591 | 1.083872 | 0.000000 |          |          |
|  | 24 | H | 1.083872 | 2.151594 | 2.511836 | 0.000000 |          |

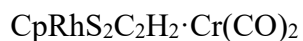

|                                                                                                              |          |          |          |          |          |          |
|--------------------------------------------------------------------------------------------------------------|----------|----------|----------|----------|----------|----------|
| 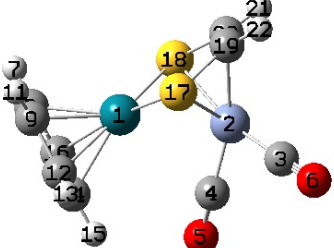 <p>1. -2448.001988 0.0</p> | 1        | 2        | 3        | 4        | 5        |          |
|                                                                                                              | 1 Rh     | 0.000000 |          |          |          |          |
|                                                                                                              | 2 Cr     | 2.620784 | 0.000000 |          |          |          |
|                                                                                                              | 3 C      | 4.084934 | 1.838556 | 0.000000 |          |          |
|                                                                                                              | 4 C      | 2.976011 | 1.829767 | 2.554837 | 0.000000 |          |
|                                                                                                              | 5 O      | 3.684117 | 2.984129 | 3.460143 | 1.154386 | 0.000000 |
|                                                                                                              | 6 O      | 5.126219 | 2.988535 | 1.150026 | 3.464217 | 4.172159 |
|                                                                                                              | 7 H      | 2.939386 | 5.357795 | 6.989399 | 5.535527 | 5.942748 |
|                                                                                                              | 8 C      | 2.207117 | 4.756014 | 6.269699 | 4.751423 | 5.100127 |
|                                                                                                              | 9 C      | 2.206536 | 4.767932 | 5.988557 | 4.863709 | 5.265455 |
|                                                                                                              | 10 H     | 2.933293 | 4.637319 | 6.185025 | 3.975941 | 3.955927 |
|                                                                                                              | 11 H     | 2.937462 | 5.376398 | 6.502096 | 5.716694 | 6.209794 |
|                                                                                                              | 12 C     | 2.176312 | 4.328960 | 5.271912 | 4.033756 | 4.266955 |
|                                                                                                              | 13 H     | 2.913759 | 4.651235 | 5.232134 | 4.354315 | 4.558919 |
|                                                                                                              | 14 C     | 2.218614 | 4.088237 | 5.190614 | 3.324669 | 3.309828 |
|                                                                                                              | 15 H     | 2.941668 | 4.170789 | 5.029737 | 2.967408 | 2.618643 |
|                                                                                                              | 16 C     | 2.192300 | 4.322931 | 5.792077 | 3.822693 | 3.936456 |
|                                                                                                              | 17 S     | 2.282033 | 2.347133 | 3.007574 | 3.578419 | 4.570273 |
|                                                                                                              | 18 S     | 2.323299 | 2.382003 | 4.194598 | 3.336830 | 4.242929 |
|                                                                                                              | 19 C     | 3.191986 | 2.177439 | 2.971540 | 3.958745 | 5.101176 |
|                                                                                                              | 20 C     | 3.183475 | 2.136640 | 3.481394 | 3.816230 | 4.929706 |
|                                                                                                              | 21 H     | 4.228445 | 2.892169 | 3.998954 | 4.519159 | 5.607596 |
| 22 H                                                                                                         | 4.233619 | 2.956610 | 3.188080 | 4.743234 | 5.885201 |          |
|                                                                                                              | 6        | 7        | 8        | 9        | 10       |          |
| 6 O                                                                                                          | 0.000000 |          |          |          |          |          |
| 7 H                                                                                                          | 8.056449 | 0.000000 |          |          |          |          |
| 8 C                                                                                                          | 7.294915 | 1.080171 | 0.000000 |          |          |          |
| 9 C                                                                                                          | 6.894671 | 2.227247 | 1.412717 | 0.000000 |          |          |
| 10 H                                                                                                         | 7.227563 | 2.705017 | 2.248687 | 3.348313 | 0.000000 |          |
| 11 H                                                                                                         | 7.354091 | 2.686546 | 2.227881 | 1.080119 | 4.361159 |          |
| 12 C                                                                                                         | 6.077863 | 3.348651 | 2.302596 | 1.437230 | 3.340279 |          |
| 13 H                                                                                                         | 5.869639 | 4.358167 | 3.345203 | 2.247526 | 4.351119 |          |
| 14 C                                                                                                         | 6.070179 | 3.358061 | 2.316028 | 2.318963 | 2.232002 |          |
| 15 H                                                                                                         | 5.811039 | 4.368658 | 3.360386 | 3.363836 | 2.688518 |          |
| 16 C                                                                                                         | 6.807240 | 2.249692 | 1.438748 | 2.306237 | 1.080533 |          |
| 17 S                                                                                                         | 3.829945 | 4.840143 | 4.235244 | 3.659177 | 5.192468 |          |
| 18 S                                                                                                         | 5.336085 | 3.813219 | 3.658316 | 4.240831 | 3.644853 |          |
| 19 C                                                                                                         | 3.843236 | 5.497153 | 5.141033 | 4.940647 | 5.817605 |          |
| 20 C                                                                                                         | 4.498291 | 5.145046 | 4.943348 | 5.128837 | 5.272878 |          |
| 21 H                                                                                                         | 4.912755 | 5.984808 | 5.887278 | 6.170034 | 6.060579 |          |
| 22 H                                                                                                         | 3.796746 | 6.512975 | 6.174226 | 5.873782 | 6.896946 |          |
|                                                                                                              | 11       | 12       | 13       | 14       | 15       |          |
| 11 H                                                                                                         | 0.000000 |          |          |          |          |          |
| 12 C                                                                                                         | 2.248992 | 0.000000 |          |          |          |          |
| 13 H                                                                                                         | 2.705093 | 1.080497 | 0.000000 |          |          |          |
| 14 C                                                                                                         | 3.361567 | 1.424348 | 2.235727 | 0.000000 |          |          |
| 15 H                                                                                                         | 4.373227 | 2.239093 | 2.695777 | 1.080024 | 0.000000 |          |
| 16 C                                                                                                         | 3.352342 | 2.295291 | 3.339417 | 1.419497 | 2.232435 |          |

|                                                                                                                |                                                                                                                                                                                                                                                                                                                                                                                                                                                                                                                                                                                                                                                                                                                                                                                                                                                                                                                                                                                                                                                                                                                                                                                                                                                                                                                                                                                                                                                                                                                                     |
|----------------------------------------------------------------------------------------------------------------|-------------------------------------------------------------------------------------------------------------------------------------------------------------------------------------------------------------------------------------------------------------------------------------------------------------------------------------------------------------------------------------------------------------------------------------------------------------------------------------------------------------------------------------------------------------------------------------------------------------------------------------------------------------------------------------------------------------------------------------------------------------------------------------------------------------------------------------------------------------------------------------------------------------------------------------------------------------------------------------------------------------------------------------------------------------------------------------------------------------------------------------------------------------------------------------------------------------------------------------------------------------------------------------------------------------------------------------------------------------------------------------------------------------------------------------------------------------------------------------------------------------------------------------|
|                                                                                                                | 17 S 3.842806 3.496450 3.573981 4.067112 4.539068<br>18 S 4.824896 4.471317 5.222520 4.130850 4.622072<br>19 C 5.134297 4.979354 5.231906 5.262945 5.689799<br>20 C 5.478005 5.282079 5.771284 5.257475 5.684121<br>21 H 6.502499 6.352483 6.851085 6.251641 6.627571<br>22 H 5.959571 5.885965 6.010557 6.254654 6.634237<br>16 17 18 19 20<br>16 C 0.000000<br>17 S 4.441682 0.000000<br>18 S 3.554191 3.240426 0.000000<br>19 C 5.313723 1.743448 2.758977 0.000000<br>20 C 5.002447 2.721089 1.750250 1.376255 0.000000<br>21 H 5.916331 3.723289 2.434788 2.140228 1.086348<br>22 H 6.380674 2.441272 3.759464 1.084253 2.150080<br>21 22<br>21 H 0.000000<br>22 H 2.487892 0.000000                                                                                                                                                                                                                                                                                                                                                                                                                                                                                                                                                                                                                                                                                                                                                                                                                                           |
| 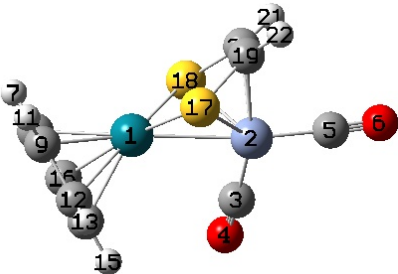 <p>2. -2447.996221 +3.6</p> | 1 2 3 4 5<br>1 Rh 0.000000<br>2 Cr 2.710005 0.000000<br>3 C 3.155170 1.867779 0.000000<br>4 O 3.840074 3.013856 1.148841 0.000000<br>5 C 4.528099 1.835804 2.734305 3.683569 0.000000<br>6 O 5.670818 2.985893 3.684970 4.481389 1.150774<br>7 H 2.954799 5.468063 5.589101 5.893840 7.162294<br>8 C 2.217634 4.860585 4.886539 5.188731 6.632881<br>9 C 2.206393 4.851350 5.138623 5.591535 6.683817<br>10 H 2.919853 4.717993 3.933787 3.770271 6.243409<br>11 H 2.943590 5.458561 6.008292 6.560737 7.258153<br>12 C 2.187919 4.419126 4.438883 4.812473 6.220517<br>13 H 2.929798 4.735775 4.861005 5.283150 6.455292<br>14 C 2.214430 4.171180 3.637574 3.737203 5.888255<br>15 H 2.946721 4.256911 3.339117 3.210610 5.802385<br>16 C 2.182359 4.412274 3.929014 3.996676 6.108751<br>17 S 2.278035 2.308238 3.805193 4.852320 3.770443<br>18 S 2.303527 2.307339 2.919832 3.671663 3.517746<br>19 C 3.234013 2.163407 3.988058 5.110729 2.963999<br>20 C 3.225970 2.097260 3.584635 4.601036 2.756063<br>21 H 4.262849 2.879481 4.215806 5.162712 2.896145<br>22 H 4.268541 2.967389 4.830728 5.972276 3.254811<br>6 7 8 9 10<br>6 O 0.000000<br>7 H 8.248800 0.000000<br>8 C 7.756735 1.079873 0.000000<br>9 C 7.830181 2.230464 1.415035 0.000000<br>10 H 7.282363 2.703943 2.245509 3.343732 0.000000<br>11 H 8.386206 2.689919 2.229536 1.080300 4.357184<br>12 C 7.363160 3.354885 2.309210 1.437500 3.340279<br>13 H 7.567030 4.363222 3.350934 2.247221 4.352425<br>14 C 7.006808 3.362998 2.320519 2.315704 2.234837 |

|    |   |          |          |          |          |          |
|----|---|----------|----------|----------|----------|----------|
| 15 | H | 6.863481 | 4.372318 | 3.363790 | 3.361917 | 2.689411 |
| 16 | C | 7.213566 | 2.247228 | 1.434702 | 2.300311 | 1.080647 |
| 17 | S | 4.805187 | 4.861141 | 4.257449 | 3.695385 | 5.169454 |
| 18 | S | 4.487084 | 3.924019 | 3.717961 | 4.275136 | 3.607882 |
| 19 | C | 3.818049 | 5.551239 | 5.192315 | 4.993447 | 5.826902 |
| 20 | C | 3.583475 | 5.227532 | 5.009079 | 5.194881 | 5.266979 |
| 21 | H | 3.412419 | 6.037336 | 5.929329 | 6.218737 | 6.038114 |
| 22 | H | 3.856368 | 6.538394 | 6.204291 | 5.902238 | 6.909023 |
|    |   | 11       | 12       | 13       | 14       | 15       |
| 11 | H | 0.000000 |          |          |          |          |
| 12 | C | 2.247276 | 0.000000 |          |          |          |
| 13 | H | 2.701260 | 1.080407 | 0.000000 |          |          |
| 14 | C | 3.357631 | 1.421839 | 2.234984 | 0.000000 |          |
| 15 | H | 4.370765 | 2.238996 | 2.698941 | 1.080108 | 0.000000 |
| 16 | C | 3.346611 | 2.296549 | 3.341958 | 1.425371 | 2.237478 |
| 17 | S | 3.896772 | 3.549175 | 3.650996 | 4.079587 | 4.559460 |
| 18 | S | 4.890364 | 4.459096 | 5.203017 | 4.075571 | 4.540470 |
| 19 | C | 5.199708 | 5.045020 | 5.310610 | 5.300690 | 5.735588 |
| 20 | C | 5.568019 | 5.339276 | 5.835614 | 5.275676 | 5.695427 |
| 21 | H | 6.573965 | 6.403708 | 6.916156 | 6.265608 | 6.641728 |
| 22 | H | 5.990212 | 5.944172 | 6.086351 | 6.297137 | 6.697910 |
|    |   | 16       | 17       | 18       | 19       | 20       |
| 16 | C | 0.000000 |          |          |          |          |
| 17 | S | 4.435646 | 0.000000 |          |          |          |
| 18 | S | 3.532609 | 3.153620 | 0.000000 |          |          |
| 19 | C | 5.338573 | 1.734214 | 2.739432 | 0.000000 |          |
| 20 | C | 5.019107 | 2.700600 | 1.744235 | 1.388323 | 0.000000 |
| 21 | H | 5.918020 | 3.714064 | 2.434147 | 2.163131 | 1.084000 |
| 22 | H | 6.402344 | 2.437998 | 3.751640 | 1.083253 | 2.172541 |
|    |   | 21       | 22       |          |          |          |
| 21 | H | 0.000000 |          |          |          |          |
| 22 | H | 2.539266 | 0.000000 |          |          |          |

**Table S7A.** Energy rank for all of the  $\text{CpRhS}_2\text{C}_2\text{H}_2 \cdot \text{Fe}(\text{CO})_n$  optimized structures. PBE0/6-311G(d,p).

Rh-Fe

|     | name                                          | E (a.u.)     | $\Delta E$<br>(kcal/mol) |
|-----|-----------------------------------------------|--------------|--------------------------|
| 4-1 | 8-rh-fe-CO-4-md2                              | -2893.711607 | 0.0                      |
| 4-2 | 7-ir-fe-CO-4-md1-new-Fe-Co-h-r-ok-new-Fe-Rh-n | -2893.695783 | 9.9                      |
| 4-3 | 7-Co-fe-CO-4-md1-r1-freq-new-Fe-Rh-l          | -2893.691537 | 12.6                     |
| 4-4 | 9-rh-fe-CO-4-md3                              | -2893.691238 | 12.8                     |
| 4-5 | 7-rh-fe-CO-4-md1-r1-freq                      | -2893.660889 | 31.8                     |
|     |                                               |              |                          |

|     |                        |              |      |
|-----|------------------------|--------------|------|
|     | name                   |              |      |
| 3-1 | 5-rh-fe-CO-3-md2       | -2780.479877 | 0.0  |
| 3-2 | 4-rh-fe-CO-3-md1       | -2780.469128 | 6.7  |
| 3-3 | 6-rh-fe-CO-3-md3       | -2780.449273 | 19.2 |
|     |                        |              |      |
|     | name                   |              |      |
| 2-1 | 1-rh-fe-CO-2-md1       | -2667.231223 | 0.0  |
| 2-2 | 3-rh-fe-CO-2-md3-fneg1 | -2667.216735 | 9.1  |

**Table S7B.** Distance table for the lowest-lying CpRhS<sub>2</sub>C<sub>2</sub>H<sub>2</sub>·Fe(CO)<sub>n</sub> structures after PBE0/6-311G(d,p) optimization.

CpRhS<sub>2</sub>C<sub>2</sub>H<sub>2</sub>·Fe(CO)<sub>4</sub>

|                                                                                                              |          |          |          |          |          |          |  |
|--------------------------------------------------------------------------------------------------------------|----------|----------|----------|----------|----------|----------|--|
| 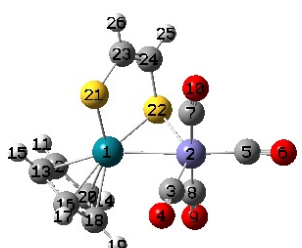 <p>1. -2893.711607 0.0</p> |          |          |          |          |          |          |  |
|                                                                                                              | 1 Rh     | 0.000000 |          |          |          |          |  |
|                                                                                                              | 2 Fe     | 2.667396 | 0.000000 |          |          |          |  |
|                                                                                                              | 3 C      | 2.898236 | 1.767646 | 0.000000 |          |          |  |
|                                                                                                              | 4 O      | 3.608716 | 2.910893 | 1.145350 | 0.000000 |          |  |
|                                                                                                              | 5 C      | 4.408796 | 1.764182 | 2.925694 | 3.888110 | 0.000000 |  |
|                                                                                                              | 6 O      | 5.548422 | 2.904509 | 3.886951 | 4.718427 | 1.142219 |  |
|                                                                                                              | 7 C      | 3.405936 | 1.815544 | 2.539974 | 3.437521 | 2.496776 |  |
|                                                                                                              | 8 C      | 3.068138 | 1.796269 | 2.583223 | 3.496888 | 2.508049 |  |
|                                                                                                              | 9 O      | 3.789740 | 2.935728 | 3.510961 | 4.248045 | 3.398436 |  |
|                                                                                                              | 10 O     | 4.288693 | 2.945005 | 3.447072 | 4.154181 | 3.326950 |  |
|                                                                                                              | 11 H     | 2.913865 | 5.340502 | 5.717991 | 6.295353 | 6.931297 |  |
|                                                                                                              | 12 C     | 2.178393 | 4.675548 | 4.816459 | 5.307830 | 6.330273 |  |
|                                                                                                              | 13 C     | 2.170429 | 4.755393 | 4.457157 | 4.712211 | 6.507652 |  |
|                                                                                                              | 14 H     | 2.951469 | 4.322688 | 4.708030 | 5.316806 | 5.611143 |  |
|                                                                                                              | 15 H     | 2.877884 | 5.447641 | 5.120879 | 5.313610 | 7.210568 |  |
|                                                                                                              | 16 C     | 2.201688 | 4.238995 | 3.511560 | 3.550049 | 5.926775 |  |
|                                                                                                              | 17 H     | 2.948646 | 4.602794 | 3.493383 | 3.204564 | 6.222019 |  |
|                                                                                                              | 18 C     | 2.225828 | 3.789642 | 3.320894 | 3.558594 | 5.330275 |  |
|                                                                                                              | 19 H     | 2.976547 | 3.778495 | 3.105986 | 3.207045 | 5.089459 |  |
|                                                                                                              | 20 C     | 2.210136 | 4.087195 | 4.201741 | 4.709128 | 5.601690 |  |
|                                                                                                              | 21 S     | 2.321473 | 3.677861 | 3.896579 | 4.486826 | 5.210466 |  |
|                                                                                                              | 22 S     | 2.300412 | 2.332723 | 3.766232 | 4.844197 | 3.471810 |  |
|                                                                                                              | 23 C     | 3.192182 | 3.831906 | 4.708015 | 5.551457 | 5.005158 |  |
|                                                                                                              | 24 C     | 3.216666 | 3.377943 | 4.685184 | 5.698786 | 4.333422 |  |
|                                                                                                              | 25 H     | 4.244577 | 4.101158 | 5.570020 | 6.624391 | 4.707407 |  |
| 26 H                                                                                                         | 4.228424 | 4.789389 | 5.613454 | 6.396835 | 5.812011 |          |  |
|                                                                                                              |          | 6        | 7        | 8        | 9        | 10       |  |
| 6 O                                                                                                          | 0.000000 |          |          |          |          |          |  |
| 7 C                                                                                                          | 3.387789 | 0.000000 |          |          |          |          |  |
| 8 C                                                                                                          | 3.400698 | 3.610316 | 0.000000 |          |          |          |  |
| 9 O                                                                                                          | 4.089940 | 4.748865 | 1.139694 | 0.000000 |          |          |  |
| 10 O                                                                                                         | 3.996895 | 1.133991 | 4.737400 | 5.874346 | 0.000000 |          |  |
| 11 H                                                                                                         | 8.018812 | 6.131697 | 5.124230 | 5.330290 | 6.918380 |          |  |
| 12 C                                                                                                         | 7.437373 | 5.563731 | 4.438489 | 4.680838 | 6.407995 |          |  |
| 13 C                                                                                                         | 7.642764 | 5.356564 | 4.864562 | 5.286533 | 6.079325 |          |  |
| 14 H                                                                                                         | 6.573287 | 5.794329 | 3.255668 | 2.993919 | 6.847715 |          |  |
| 15 H                                                                                                         | 8.351538 | 5.740736 | 5.794236 | 6.300982 | 6.298853 |          |  |
| 16 C                                                                                                         | 7.022891 | 5.021362 | 4.238892 | 4.642972 | 5.824948 |          |  |
| 17 H                                                                                                         | 7.279528 | 5.176488 | 4.793160 | 5.264571 | 5.869494 |          |  |
| 18 C                                                                                                         | 6.374830 | 5.040975 | 3.229812 | 3.387444 | 6.024237 |          |  |
| 19 H                                                                                                         | 6.036705 | 5.200279 | 2.945417 | 2.937175 | 6.226011 |          |  |
| 20 C                                                                                                         | 6.650794 | 5.374495 | 3.384449 | 3.413764 | 6.372927 |          |  |
| 21 S                                                                                                         | 6.278698 | 3.128703 | 4.894535 | 5.837664 | 3.406666 |          |  |



|  |      |          |          |          |          |          |
|--|------|----------|----------|----------|----------|----------|
|  | 22 S | 4.470946 | 3.018458 | 2.841946 | 3.622920 | 3.889255 |
|  | 23 C | 5.955358 | 3.077907 | 5.120714 | 6.080788 | 3.203331 |
|  | 24 C | 5.228690 | 3.038409 | 4.443938 | 5.330834 | 3.425122 |
|  | 25 H | 5.437284 | 3.704404 | 5.084042 | 5.908482 | 3.947313 |
|  | 26 H | 6.677064 | 3.754220 | 6.166181 | 7.143305 | 3.563272 |
|  |      | 11       | 12       | 13       | 14       | 15       |
|  | 11 H | 0.000000 |          |          |          |          |
|  | 12 C | 1.079771 | 0.000000 |          |          |          |
|  | 13 C | 2.239998 | 1.426401 | 0.000000 |          |          |
|  | 14 H | 2.708323 | 2.244405 | 3.349204 | 0.000000 |          |
|  | 15 H | 2.690478 | 2.233921 | 1.080533 | 4.359343 | 0.000000 |
|  | 16 C | 3.360471 | 2.317756 | 1.426114 | 3.355707 | 2.237101 |
|  | 17 H | 4.371109 | 3.361767 | 2.242692 | 4.364802 | 2.700233 |
|  | 18 C | 3.352459 | 2.308109 | 2.299696 | 2.232060 | 3.344744 |
|  | 19 H | 4.363685 | 3.352400 | 3.344215 | 2.685583 | 4.356243 |
|  | 20 C | 2.248244 | 1.432380 | 2.304204 | 1.080491 | 3.347698 |
|  | 21 S | 4.117200 | 3.755555 | 3.240726 | 5.161430 | 3.144578 |
|  | 22 S | 3.914624 | 3.698196 | 4.266458 | 3.630176 | 4.856514 |
|  | 23 C | 4.655221 | 4.583044 | 4.534489 | 5.646123 | 4.523391 |
|  | 24 C | 4.608472 | 4.593718 | 4.908251 | 5.150063 | 5.147332 |
|  | 25 H | 5.368555 | 5.483252 | 5.919950 | 5.869557 | 6.145539 |
|  | 26 H | 5.469596 | 5.493118 | 5.362756 | 6.688084 | 5.177581 |
|  |      | 16       | 17       | 18       | 19       | 20       |
|  | 16 C | 0.000000 |          |          |          |          |
|  | 17 H | 1.079833 | 0.000000 |          |          |          |
|  | 18 C | 1.429320 | 2.243696 | 0.000000 |          |          |
|  | 19 H | 2.239003 | 2.698266 | 1.080735 | 0.000000 |          |
|  | 20 C | 2.312127 | 3.355078 | 1.419195 | 2.230712 | 0.000000 |
|  | 21 S | 3.657241 | 3.951863 | 4.338571 | 5.083460 | 4.389098 |
|  | 22 S | 4.463113 | 5.206623 | 4.055706 | 4.527365 | 3.549038 |
|  | 23 C | 5.065336 | 5.521910 | 5.415853 | 6.111725 | 5.144159 |
|  | 24 C | 5.360722 | 5.972425 | 5.354516 | 5.955673 | 4.895415 |
|  | 25 H | 6.411150 | 7.047783 | 6.318553 | 6.882097 | 5.755552 |
|  | 26 H | 5.971525 | 6.349654 | 6.438574 | 7.153837 | 6.170657 |
|  |      | 21       | 22       | 23       | 24       | 25       |
|  | 21 S | 0.000000 |          |          |          |          |
|  | 22 S | 3.187466 | 0.000000 |          |          |          |
|  | 23 C | 1.725286 | 2.695175 | 0.000000 |          |          |
|  | 24 C | 2.710150 | 1.753389 | 1.342823 | 0.000000 |          |
|  | 25 H | 3.724321 | 2.431600 | 2.142119 | 1.083940 | 0.000000 |
|  | 26 H | 2.403948 | 3.708167 | 1.086938 | 2.116161 | 2.498922 |
|  |      | 26       |          |          |          |          |
|  | 26 H | 0.000000 |          |          |          |          |
|  |      | 1        | 2        | 3        | 4        | 5        |
|  | 1 Rh | 0.000000 |          |          |          |          |
|  | 2 Fe | 3.251523 | 0.000000 |          |          |          |
|  | 3 C  | 2.047157 | 1.996512 | 0.000000 |          |          |
|  | 4 O  | 2.851824 | 2.915194 | 1.182919 | 0.000000 |          |
|  | 5 C  | 4.812072 | 1.822457 | 3.817784 | 4.690952 | 0.000000 |
|  | 6 O  | 5.873506 | 2.958732 | 4.953159 | 5.806141 | 1.137179 |

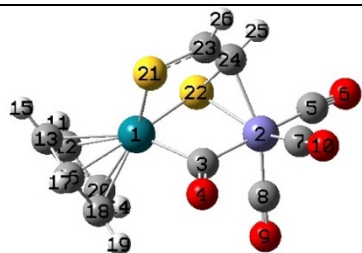

|                      |      |          |          |          |          |          |          |
|----------------------|------|----------|----------|----------|----------|----------|----------|
| 2. -2893.695783 +9.9 | 7 C  | 4.421060 | 1.769338 | 2.624824 | 2.932737 | 2.633719 |          |
|                      | 8 C  | 3.811360 | 1.770632 | 2.500401 | 3.063942 | 2.652949 |          |
|                      | 9 O  | 4.505150 | 2.910669 | 3.321604 | 3.650799 | 3.569649 |          |
|                      | 10 O | 5.322907 | 2.906473 | 3.448073 | 3.429778 | 3.567063 |          |
|                      | 11 H | 3.064803 | 5.655769 | 4.965912 | 5.745703 | 6.705514 |          |
|                      | 12 C | 2.336875 | 5.219944 | 4.212508 | 4.858590 | 6.504679 |          |
|                      | 13 C | 2.340832 | 5.579547 | 4.213926 | 4.654164 | 7.063980 |          |
|                      | 14 H | 2.955140 | 4.599072 | 3.885084 | 4.464310 | 5.739191 |          |
|                      | 15 H | 3.071992 | 6.281292 | 4.969956 | 5.413295 | 7.716110 |          |
|                      | 16 C | 2.218462 | 5.228980 | 3.510311 | 3.623243 | 6.907575 |          |
|                      | 17 H | 2.947305 | 5.746173 | 3.868414 | 3.703125 | 7.502945 |          |
|                      | 18 C | 2.229557 | 4.689157 | 3.102457 | 3.237304 | 6.309486 |          |
|                      | 19 H | 2.910423 | 4.708255 | 3.060949 | 2.872795 | 6.357589 |          |
|                      | 20 C | 2.220075 | 4.587302 | 3.514982 | 4.045489 | 5.945836 |          |
|                      | 21 S | 2.305315 | 3.791816 | 2.854334 | 3.429040 | 5.216032 |          |
|                      | 22 S | 2.342063 | 2.276530 | 2.841279 | 4.022021 | 3.048150 |          |
|                      | 23 C | 3.098549 | 3.014995 | 3.047084 | 3.856871 | 4.016493 |          |
|                      | 24 C | 3.134065 | 2.101007 | 2.940463 | 3.985680 | 2.759707 |          |
|                      | 25 H | 4.175918 | 2.696333 | 3.940724 | 4.959095 | 2.616902 |          |
|                      | 26 H | 4.153388 | 3.764951 | 3.940034 | 4.601547 | 4.510720 |          |
|                      |      |          | 6        | 7        | 8        | 9        | 10       |
|                      |      | 6 O      | 0.000000 |          |          |          |          |
|                      |      | 7 C      | 3.553976 | 0.000000 |          |          |          |
|                      |      | 8 C      | 3.556030 | 2.726838 | 0.000000 |          |          |
|                      |      | 9 O      | 4.296356 | 3.690205 | 1.140223 | 0.000000 |          |
|                      |      | 10 O     | 4.323051 | 1.137877 | 3.686341 | 4.513127 | 0.000000 |
|                      |      | 11 H     | 7.525417 | 7.192698 | 5.843235 | 6.212600 | 8.210268 |
|                      |      | 12 C     | 7.430940 | 6.623718 | 5.342501 | 5.700027 | 7.584114 |
|                      |      | 13 C     | 8.073369 | 6.719209 | 5.909714 | 6.364978 | 7.549318 |
|                      |      | 14 H     | 6.600432 | 6.057092 | 3.994367 | 3.969927 | 7.059302 |
|                      |      | 15 H     | 8.703741 | 7.362490 | 6.811739 | 7.348228 | 8.150585 |
|                      |      | 16 C     | 7.992240 | 6.109275 | 5.379732 | 5.760600 | 6.825809 |
|                      |      | 17 H     | 8.618378 | 6.352819 | 5.972922 | 6.374658 | 6.917427 |
|                      |      | 18 C     | 7.364983 | 5.689080 | 4.416429 | 4.596294 | 6.482398 |
|                      |      | 19 H     | 7.416934 | 5.485656 | 4.154683 | 4.167350 | 6.181834 |
|                      |      | 20 C     | 6.901673 | 5.943823 | 4.302054 | 4.476238 | 6.896884 |
|                      |      | 21 S     | 6.235598 | 4.309747 | 5.069554 | 6.022092 | 4.917958 |
|                      |      | 22 S     | 3.922035 | 3.910238 | 3.256998 | 4.160077 | 4.999410 |
|                      |      | 23 C     | 4.919918 | 3.473110 | 4.657315 | 5.752842 | 4.125871 |
|                      |      | 24 C     | 3.635468 | 3.063701 | 3.774172 | 4.883049 | 3.970749 |
|                      |      | 25 H     | 3.199378 | 3.479530 | 4.354653 | 5.455249 | 4.296939 |
|                      |      | 26 H     | 5.286738 | 3.830028 | 5.481680 | 6.602238 | 4.244696 |
|                      |      |          | 11       | 12       | 13       | 14       | 15       |
|                      | 11 H | 0.000000 |          |          |          |          |          |
|                      | 12 C | 1.080629 | 0.000000 |          |          |          |          |
|                      | 13 C | 2.211669 | 1.393348 | 0.000000 |          |          |          |
|                      | 14 H | 2.708643 | 2.255453 | 3.337923 | 0.000000 |          |          |
|                      | 15 H | 2.671074 | 2.210859 | 1.080812 | 4.352762 | 0.000000 |          |
|                      | 16 C | 3.346283 | 2.298555 | 1.445597 | 3.335624 | 2.253356 |          |
|                      | 17 H | 4.354165 | 3.339168 | 2.256563 | 4.346684 | 2.710818 |          |

|  |      |          |          |          |          |          |
|--|------|----------|----------|----------|----------|----------|
|  | 18 C | 3.357800 | 2.316570 | 2.315760 | 2.231699 | 3.357344 |
|  | 19 H | 4.371787 | 3.363688 | 3.360314 | 2.695223 | 4.367609 |
|  | 20 C | 2.254648 | 1.447021 | 2.298291 | 1.080740 | 3.346279 |
|  | 21 S | 4.752290 | 4.202706 | 3.632963 | 5.257503 | 3.746870 |
|  | 22 S | 3.799619 | 3.686160 | 4.266056 | 3.710197 | 4.826030 |
|  | 23 C | 5.481157 | 5.123406 | 4.921018 | 5.792458 | 5.115111 |
|  | 24 C | 5.259753 | 5.031463 | 5.212279 | 5.275616 | 5.588823 |
|  | 25 H | 6.008736 | 5.917066 | 6.176930 | 6.114049 | 6.492410 |
|  | 26 H | 6.480787 | 6.151074 | 5.853542 | 6.880830 | 5.930838 |
|  |      | 16       | 17       | 18       | 19       | 20       |
|  | 16 C | 0.000000 |          |          |          |          |
|  | 17 H | 1.080424 | 0.000000 |          |          |          |
|  | 18 C | 1.418970 | 2.230688 | 0.000000 |          |          |
|  | 19 H | 2.229305 | 2.683325 | 1.080177 | 0.000000 |          |
|  | 20 C | 2.290150 | 3.334367 | 1.417664 | 2.234263 | 0.000000 |
|  | 21 S | 3.553637 | 3.677285 | 4.188061 | 4.717893 | 4.476584 |
|  | 22 S | 4.516951 | 5.287431 | 4.215644 | 4.734603 | 3.591336 |
|  | 23 C | 4.921366 | 5.190166 | 5.223584 | 5.652787 | 5.259786 |
|  | 24 C | 5.279775 | 5.773404 | 5.237696 | 5.629880 | 4.993674 |
|  | 25 H | 6.338538 | 6.845098 | 6.277141 | 6.666665 | 5.927746 |
|  | 26 H | 5.843811 | 5.989801 | 6.236518 | 6.627255 | 6.336068 |
|  |      | 21       | 22       | 23       | 24       | 25       |
|  | 21 S | 0.000000 |          |          |          |          |
|  | 22 S | 3.257445 | 0.000000 |          |          |          |
|  | 23 C | 1.659935 | 2.754624 | 0.000000 |          |          |
|  | 24 C | 2.725282 | 1.775288 | 1.410498 | 0.000000 |          |
|  | 25 H | 3.645049 | 2.444135 | 2.115553 | 1.086845 | 0.000000 |
|  | 26 H | 2.361160 | 3.736714 | 1.089068 | 2.150882 | 2.410741 |
|  |      | 26       |          |          |          |          |
|  | 26 H | 0.000000 |          |          |          |          |
|  |      | 1        | 2        | 3        | 4        | 5        |
|  | 1 Rh | 0.000000 |          |          |          |          |
|  | 2 Fe | 2.934241 | 0.000000 |          |          |          |
|  | 3 C  | 4.021161 | 1.765379 | 0.000000 |          |          |
|  | 4 O  | 4.913513 | 2.901914 | 1.136920 | 0.000000 |          |
|  | 5 C  | 4.021113 | 1.765383 | 2.598167 | 3.533837 | 0.000000 |
|  | 6 O  | 4.913748 | 2.901935 | 3.533283 | 4.308214 | 1.136920 |
|  | 7 C  | 4.388510 | 1.848723 | 2.686625 | 3.611396 | 2.686682 |
|  | 8 C  | 1.976250 | 1.977272 | 2.607445 | 3.444106 | 2.607069 |
|  | 9 O  | 2.875523 | 2.931647 | 3.063242 | 3.618263 | 3.062759 |
|  | 10 O | 5.444914 | 2.979324 | 3.579824 | 4.333935 | 3.579873 |
|  | 11 H | 3.106645 | 5.665601 | 7.035633 | 7.981438 | 6.527751 |
|  | 12 C | 2.369397 | 5.188694 | 6.387456 | 7.261075 | 6.100966 |
|  | 13 C | 2.368928 | 5.187440 | 6.097030 | 6.835113 | 6.387281 |
|  | 14 H | 2.922084 | 5.207600 | 6.413136 | 7.295585 | 5.461205 |
|  | 15 H | 3.105936 | 5.663355 | 6.520951 | 7.221428 | 7.035029 |
|  | 16 C | 2.194883 | 4.872536 | 5.458212 | 6.052678 | 5.977798 |
|  | 17 H | 2.922151 | 5.205203 | 5.456568 | 5.866199 | 6.407640 |
|  | 18 C | 2.188274 | 4.785266 | 5.495097 | 6.155905 | 5.493272 |
|  | 19 H | 2.851866 | 4.961701 | 5.438335 | 5.982231 | 5.434550 |

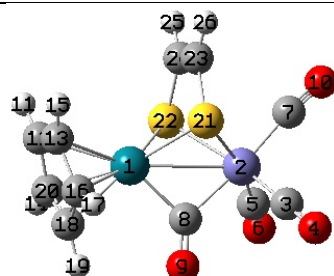

3. -2893.691537 +12.6

|  |    |   |          |          |          |          |          |  |  |  |
|--|----|---|----------|----------|----------|----------|----------|--|--|--|
|  | 20 | C | 2.195077 | 4.874172 | 5.981033 | 6.822222 | 5.461108 |  |  |  |
|  | 21 | S | 2.404355 | 2.410245 | 3.046382 | 3.828502 | 4.152229 |  |  |  |
|  | 22 | S | 2.404268 | 2.410289 | 4.152262 | 5.278262 | 3.046783 |  |  |  |
|  | 23 | C | 3.173967 | 3.132966 | 4.286941 | 5.202644 | 4.671973 |  |  |  |
|  | 24 | C | 3.173944 | 3.132970 | 4.671727 | 5.725775 | 4.287326 |  |  |  |
|  | 25 | H | 4.123183 | 4.075605 | 5.641318 | 6.698559 | 5.023261 |  |  |  |
|  | 26 | H | 4.123212 | 4.075587 | 5.022771 | 5.825045 | 5.641557 |  |  |  |
|  |    |   | 6        | 7        | 8        | 9        | 10       |  |  |  |
|  | 6  | O | 0.000000 |          |          |          |          |  |  |  |
|  | 7  | C | 3.611583 | 0.000000 |          |          |          |  |  |  |
|  | 8  | C | 3.443583 | 3.820528 | 0.000000 |          |          |  |  |  |
|  | 9  | O | 3.617312 | 4.761312 | 1.181664 | 0.000000 |          |  |  |  |
|  | 10 | O | 4.334130 | 1.134416 | 4.953898 | 5.874255 | 0.000000 |  |  |  |
|  | 11 | H | 7.231063 | 6.659493 | 4.951725 | 5.677155 | 7.507911 |  |  |  |
|  | 12 | C | 6.840805 | 6.406241 | 4.202164 | 4.835374 | 7.350618 |  |  |  |
|  | 13 | C | 7.261773 | 6.405959 | 4.199770 | 4.832129 | 7.350691 |  |  |  |
|  | 14 | H | 5.872441 | 6.678338 | 3.857924 | 4.098104 | 7.701010 |  |  |  |
|  | 15 | H | 7.981977 | 6.658909 | 4.947817 | 5.671861 | 7.507977 |  |  |  |
|  | 16 | C | 6.818470 | 6.364737 | 3.487162 | 3.847079 | 7.405374 |  |  |  |
|  | 17 | H | 7.288751 | 6.678922 | 3.851282 | 4.087549 | 7.702618 |  |  |  |
|  | 18 | C | 6.153404 | 6.449494 | 3.088853 | 3.201669 | 7.546447 |  |  |  |
|  | 19 | H | 5.976584 | 6.746187 | 3.050769 | 2.753626 | 7.873424 |  |  |  |
|  | 20 | C | 6.056560 | 6.364690 | 3.491306 | 3.853242 | 7.404763 |  |  |  |
|  | 21 | S | 5.278311 | 3.117248 | 2.900830 | 3.952981 | 3.989112 |  |  |  |
|  | 22 | S | 3.829725 | 3.117076 | 2.900731 | 3.952942 | 3.988873 |  |  |  |
|  | 23 | C | 5.726487 | 3.044324 | 4.090382 | 5.259322 | 3.603226 |  |  |  |
|  | 24 | C | 5.203777 | 3.044228 | 4.090351 | 5.259310 | 3.603090 |  |  |  |
|  | 25 | H | 5.826467 | 3.677913 | 5.096621 | 6.247505 | 3.978973 |  |  |  |
|  | 26 | H | 6.699248 | 3.678056 | 5.096657 | 6.247511 | 3.979201 |  |  |  |
|  |    |   | 11       | 12       | 13       | 14       | 15       |  |  |  |
|  | 11 | H | 0.000000 |          |          |          |          |  |  |  |
|  | 12 | C | 1.080785 | 0.000000 |          |          |          |  |  |  |
|  | 13 | C | 2.205461 | 1.385871 | 0.000000 |          |          |  |  |  |
|  | 14 | H | 2.709619 | 2.258995 | 3.335613 | 0.000000 |          |  |  |  |
|  | 15 | H | 2.666791 | 2.205412 | 1.080808 | 4.351167 | 0.000000 |  |  |  |
|  | 16 | C | 3.345624 | 2.297210 | 1.450875 | 3.333838 | 2.255953 |  |  |  |
|  | 17 | H | 4.351394 | 3.335879 | 2.259014 | 4.346798 | 2.709474 |  |  |  |
|  | 18 | C | 3.360603 | 2.320227 | 2.320044 | 2.232622 | 3.360411 |  |  |  |
|  | 19 | H | 4.373020 | 3.366525 | 3.366348 | 2.692399 | 4.372821 |  |  |  |
|  | 20 | C | 2.256078 | 1.450877 | 2.296885 | 1.080491 | 3.345329 |  |  |  |
|  | 21 | S | 4.786637 | 4.276964 | 3.748349 | 5.304458 | 3.840319 |  |  |  |
|  | 22 | S | 3.845465 | 3.751392 | 4.280398 | 3.848429 | 4.791978 |  |  |  |
|  | 23 | C | 4.508733 | 4.412911 | 4.201606 | 5.642500 | 4.101836 |  |  |  |
|  | 24 | C | 4.100089 | 4.200801 | 4.416259 | 5.105586 | 4.514695 |  |  |  |
|  | 25 | H | 4.414554 | 4.755955 | 5.115039 | 5.671107 | 5.129113 |  |  |  |
|  | 26 | H | 5.120533 | 5.110299 | 4.756468 | 6.572953 | 4.415974 |  |  |  |
|  |    |   | 16       | 17       | 18       | 19       | 20       |  |  |  |
|  | 16 | C | 0.000000 |          |          |          |          |  |  |  |
|  | 17 | H | 1.080479 | 0.000000 |          |          |          |  |  |  |
|  | 18 | C | 1.419270 | 2.232694 | 0.000000 |          |          |  |  |  |

|                                                                                                                 |                                                                                                                                                                                                                                                                                                                                                                                                                                                                                                                                                                                                                                                                                                                                                                                                                                                                                                                                                                                                                                                                                                                                                                                                                                                                                                                                                                                                                                                                                                                                     |
|-----------------------------------------------------------------------------------------------------------------|-------------------------------------------------------------------------------------------------------------------------------------------------------------------------------------------------------------------------------------------------------------------------------------------------------------------------------------------------------------------------------------------------------------------------------------------------------------------------------------------------------------------------------------------------------------------------------------------------------------------------------------------------------------------------------------------------------------------------------------------------------------------------------------------------------------------------------------------------------------------------------------------------------------------------------------------------------------------------------------------------------------------------------------------------------------------------------------------------------------------------------------------------------------------------------------------------------------------------------------------------------------------------------------------------------------------------------------------------------------------------------------------------------------------------------------------------------------------------------------------------------------------------------------|
|                                                                                                                 | 19 H 2.233244 2.692450 1.080150 0.000000<br>20 C 2.288371 3.333855 1.419255 2.233283 0.000000<br>21 S 3.702824 3.852611 4.320562 4.857093 4.551020<br>22 S 4.551688 5.305504 4.318029 4.852410 3.701080<br>23 C 4.711843 5.112688 5.267204 5.993121 5.020276<br>24 C 5.023520 5.648135 5.266314 5.991487 4.708090<br>25 H 5.898623 6.579503 6.113787 6.885035 5.379320<br>26 H 5.384019 5.680196 6.115249 6.887749 5.894778<br>21 22 23 24 25<br>21 S 0.000000<br>22 S 3.063497 0.000000<br>23 C 1.797121 2.700688 0.000000<br>24 C 2.700662 1.797143 1.326576 0.000000<br>25 H 3.736603 2.487186 2.131735 1.084886 0.000000<br>26 H 2.487150 3.736634 1.084884 2.131750 2.538378<br>26<br>26 H 0.000000                                                                                                                                                                                                                                                                                                                                                                                                                                                                                                                                                                                                                                                                                                                                                                                                                            |
| 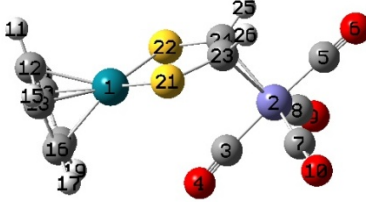 <p>4. -2893.691238 +12.8</p> | 1 2 3 4 5<br>1 Rh 0.000000<br>2 Fe 4.340465 0.000000<br>3 C 3.527240 1.803243 0.000000<br>4 O 3.528524 2.938011 1.137539 0.000000<br>5 C 5.681674 1.795523 3.597611 4.729496 0.000000<br>6 O 6.645341 2.934675 4.736460 5.867312 1.139152<br>7 C 5.301033 1.772234 2.504407 3.374885 2.513647<br>8 C 5.302836 1.772089 2.504172 3.374593 2.512952<br>9 O 6.137010 2.914829 3.397194 4.059091 3.411816<br>10 O 6.134457 2.914957 3.397467 4.059482 3.412632<br>11 H 2.890495 7.048608 6.399872 6.330071 8.120599<br>12 C 2.161485 6.483973 5.621891 5.426697 7.735157<br>13 C 2.183821 6.319346 5.336458 5.056673 7.657786<br>14 H 2.923587 6.517770 5.537212 5.241351 7.842230<br>15 H 2.918684 6.756972 5.918255 5.721118 7.976807<br>16 C 2.178201 5.861507 4.557909 4.033937 7.412658<br>17 H 2.908481 5.915917 4.508934 3.874033 7.519528<br>18 C 2.167865 5.759559 4.386319 3.803808 7.352904<br>19 H 2.894600 5.725442 4.177669 3.409344 7.409238<br>20 C 2.193015 6.192283 5.122623 4.780219 7.591038<br>21 S 2.244689 3.409749 3.245971 3.708218 4.435615<br>22 S 2.245769 3.409736 3.244369 3.705894 4.436339<br>23 C 3.209373 2.147940 2.887137 3.797573 2.781944<br>24 C 3.209855 2.148184 2.886625 3.796835 2.782554<br>25 H 4.161988 2.657365 3.761913 4.729399 2.616618<br>26 H 4.161180 2.657216 3.762638 4.730418 2.615844<br>6 7 8 9 10<br>6 O 0.000000<br>7 C 3.416916 0.000000<br>8 C 3.416087 3.024798 0.000000<br>9 O 4.119987 4.027961 1.143192 0.000000<br>10 O 4.121090 1.143176 4.027950 4.931754 0.000000 |

|  |      |          |          |          |          |          |
|--|------|----------|----------|----------|----------|----------|
|  | 11 H | 8.922938 | 8.082534 | 7.923304 | 8.659822 | 8.896495 |
|  | 12 C | 8.629908 | 7.437010 | 7.344421 | 8.081163 | 8.218054 |
|  | 13 C | 8.594462 | 6.946410 | 7.397952 | 8.238125 | 7.570075 |
|  | 14 H | 8.770429 | 7.775641 | 6.830745 | 7.285367 | 8.693615 |
|  | 15 H | 8.853679 | 7.210326 | 8.012039 | 8.929411 | 7.735395 |
|  | 16 C | 8.447590 | 6.391388 | 6.796820 | 7.572583 | 6.973238 |
|  | 17 H | 8.576818 | 6.152238 | 6.921322 | 7.723793 | 6.577487 |
|  | 18 C | 8.406583 | 6.594687 | 6.346941 | 6.958878 | 7.324851 |
|  | 19 H | 8.501536 | 6.542561 | 6.067749 | 6.552324 | 7.259145 |
|  | 20 C | 8.556203 | 7.270329 | 6.747692 | 7.337167 | 8.110426 |
|  | 21 S | 5.303842 | 3.880247 | 4.956355 | 6.029994 | 4.566899 |
|  | 22 S | 5.304808 | 4.955740 | 3.881184 | 4.568182 | 6.029130 |
|  | 23 C | 3.615290 | 3.062442 | 3.691425 | 4.783442 | 3.994363 |
|  | 24 C | 3.615946 | 3.691829 | 3.062494 | 3.994347 | 4.783849 |
|  | 25 H | 3.171524 | 4.232238 | 3.217348 | 4.001094 | 5.323113 |
|  | 26 H | 3.170597 | 3.217751 | 4.231552 | 5.322314 | 4.001696 |
|  |      | 11       | 12       | 13       | 14       | 15       |
|  | 11 H | 0.000000 |          |          |          |          |
|  | 12 C | 1.080477 | 0.000000 |          |          |          |
|  | 13 C | 2.244615 | 1.435041 | 0.000000 |          |          |
|  | 14 H | 2.695605 | 2.238928 | 3.363317 | 0.000000 |          |
|  | 15 H | 2.699220 | 2.245570 | 1.080040 | 4.371487 | 0.000000 |
|  | 16 C | 3.345215 | 2.302709 | 1.415946 | 3.360620 | 2.232544 |
|  | 17 H | 4.358815 | 3.349262 | 2.232292 | 4.367769 | 2.695801 |
|  | 18 C | 3.341355 | 2.297229 | 2.308426 | 2.235201 | 3.354806 |
|  | 19 H | 4.353957 | 3.342767 | 3.349619 | 2.695845 | 4.362542 |
|  | 20 C | 2.237951 | 1.425949 | 2.319509 | 1.079988 | 3.361584 |
|  | 21 S | 4.494290 | 4.010050 | 3.498806 | 5.148306 | 3.598182 |
|  | 22 S | 4.187156 | 3.825896 | 4.352668 | 3.485338 | 5.059637 |
|  | 23 C | 5.533774 | 5.165624 | 5.003731 | 5.775427 | 5.242047 |
|  | 24 C | 5.424994 | 5.102852 | 5.294933 | 5.190006 | 5.756572 |
|  | 25 H | 6.069285 | 5.887883 | 6.219499 | 5.842543 | 6.658253 |
|  | 26 H | 6.241286 | 5.984233 | 5.774692 | 6.748931 | 5.853805 |
|  |      | 16       | 17       | 18       | 19       | 20       |
|  | 16 C | 0.000000 |          |          |          |          |
|  | 17 H | 1.080130 | 0.000000 |          |          |          |
|  | 18 C | 1.437561 | 2.245953 | 0.000000 |          |          |
|  | 19 H | 2.245510 | 2.696453 | 1.080420 | 0.000000 |          |
|  | 20 C | 2.315568 | 3.356603 | 1.420328 | 2.235055 | 0.000000 |
|  | 21 S | 3.592213 | 3.765947 | 4.155785 | 4.730551 | 4.414143 |
|  | 22 S | 4.293204 | 4.959637 | 3.730216 | 4.016430 | 3.442653 |
|  | 23 C | 5.003692 | 5.238545 | 5.180831 | 5.552815 | 5.312707 |
|  | 24 C | 5.245036 | 5.665864 | 5.034075 | 5.295519 | 4.981237 |
|  | 25 H | 6.262348 | 6.731293 | 5.976085 | 6.224875 | 5.774519 |
|  | 26 H | 5.900547 | 6.084596 | 6.194926 | 6.611380 | 6.277763 |
|  |      | 21       | 22       | 23       | 24       | 25       |
|  | 21 S | 0.000000 |          |          |          |          |
|  | 22 S | 3.141519 | 0.000000 |          |          |          |
|  | 23 C | 1.760554 | 2.740799 | 0.000000 |          |          |
|  | 24 C | 2.741087 | 1.760465 | 1.404854 | 0.000000 |          |

|                                                                                                                |                                                   |
|----------------------------------------------------------------------------------------------------------------|---------------------------------------------------|
|                                                                                                                | 25 H 3.684870 2.394037 2.164911 1.085313 0.000000 |
|                                                                                                                | 26 H 2.393517 3.684816 1.085311 2.165169 2.498122 |
|                                                                                                                | 26                                                |
|                                                                                                                | 26 H 0.000000                                     |
| 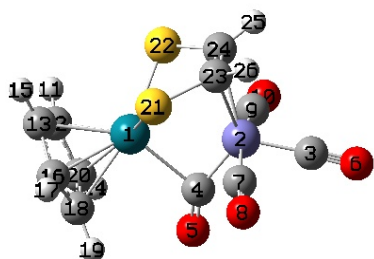 <p>5. -2893.660889 +31.8</p> | 1 2 3 4 5                                         |
|                                                                                                                | 1 Rh 0.000000                                     |
|                                                                                                                | 2 Fe 2.731513 0.000000                            |
|                                                                                                                | 3 C 4.466320 1.750208 0.000000                    |
|                                                                                                                | 4 C 2.239394 1.803815 3.008967 0.000000           |
|                                                                                                                | 5 O 3.059454 2.874643 3.715626 1.162954 0.000000  |
|                                                                                                                | 6 O 5.602005 2.893127 1.143152 4.007915 4.537334  |
|                                                                                                                | 7 C 3.360079 1.827481 2.419271 2.515604 3.321761  |
|                                                                                                                | 8 O 4.191083 2.955941 3.238323 3.386297 3.970240  |
|                                                                                                                | 9 C 3.411400 1.825689 2.424632 2.496539 3.274014  |
|                                                                                                                | 10 O 4.259413 2.953609 3.242565 3.366944 3.910820 |
|                                                                                                                | 11 H 2.945002 5.241490 6.875349 4.536126 4.928415 |
|                                                                                                                | 12 C 2.234056 4.780570 6.461749 3.898783 4.253847 |
|                                                                                                                | 13 C 2.233598 4.954849 6.694990 4.272493 4.761255 |
|                                                                                                                | 14 H 2.968389 4.625828 5.986412 3.151295 2.910671 |
|                                                                                                                | 15 H 2.946731 5.541277 7.286844 5.132780 5.737001 |
|                                                                                                                | 16 C 2.234718 4.717729 6.363619 3.790481 4.118360 |
|                                                                                                                | 17 H 2.952321 5.141604 6.709249 4.366360 4.711634 |
|                                                                                                                | 18 C 2.245833 4.386827 5.907807 3.008872 3.007555 |
|                                                                                                                | 19 H 2.969622 4.554912 5.868617 2.999757 2.682234 |
|                                                                                                                | 20 C 2.235555 4.414607 5.958786 3.078799 3.108786 |
|                                                                                                                | 21 S 2.378466 3.074103 4.526259 3.659384 4.673727 |
|                                                                                                                | 22 S 2.372689 3.060959 4.535835 3.609246 4.603414 |
| 23 C 3.061471 2.277522 3.391288 3.658436 4.809083                                                              |                                                   |
| 24 C 3.060310 2.269860 3.396518 3.637050 4.779811                                                              |                                                   |
| 25 H 4.094411 2.859589 3.482056 4.395864 5.497999                                                              |                                                   |
| 26 H 4.095710 2.867978 3.469460 4.425705 5.541665                                                              |                                                   |
|                                                                                                                | 6 7 8 9 10                                        |
| 6 O 0.000000                                                                                                   |                                                   |
| 7 C 3.277280 0.000000                                                                                          |                                                   |
| 8 O 3.851558 1.134707 0.000000                                                                                 |                                                   |
| 9 C 3.300062 3.624765 4.731018 0.000000                                                                        |                                                   |
| 10 O 3.879960 4.730741 5.819522 1.134069 0.000000                                                              |                                                   |
| 11 H 7.969798 6.265779 7.127518 4.973221 5.245527                                                              |                                                   |
| 12 C 7.574237 5.555463 6.323851 4.846486 5.309540                                                              |                                                   |
| 13 C 7.831343 5.331537 5.937622 5.473540 6.144397                                                              |                                                   |
| 14 H 6.961215 5.478739 6.235322 4.409593 4.686287                                                              |                                                   |
| 15 H 8.428064 5.886267 6.467393 6.083915 6.756680                                                              |                                                   |
| 16 C 7.456842 4.675738 5.082050 5.572731 6.373971                                                              |                                                   |
| 17 H 7.766904 4.722632 4.905672 6.258134 7.153678                                                              |                                                   |
| 18 C 6.948892 4.511631 4.985846 5.037349 5.741847                                                              |                                                   |
| 19 H 6.818252 4.415080 4.721520 5.328397 6.052814                                                              |                                                   |
| 20 C 7.012400 5.083564 5.793515 4.529779 5.006721                                                              |                                                   |
| 21 S 5.569775 2.849582 3.389147 4.440020 5.485794                                                              |                                                   |
| 22 S 5.595128 4.412418 5.454837 2.865116 3.416363                                                              |                                                   |
| 23 C 4.360394 2.643761 3.469558 3.456352 4.469130                                                              |                                                   |

|  |    |   |          |          |          |          |          |
|--|----|---|----------|----------|----------|----------|----------|
|  | 24 | C | 4.374062 | 3.455459 | 4.472881 | 2.632164 | 3.455069 |
|  | 25 | H | 4.263554 | 4.124076 | 5.123369 | 2.810799 | 3.404724 |
|  | 26 | H | 4.234797 | 2.846084 | 3.452314 | 4.110639 | 5.099673 |
|  |    |   | 11       | 12       | 13       | 14       | 15       |
|  | 11 | H | 0.000000 |          |          |          |          |
|  | 12 | C | 1.081155 | 0.000000 |          |          |          |
|  | 13 | C | 2.232525 | 1.422727 | 0.000000 |          |          |
|  | 14 | H | 2.690851 | 2.236705 | 3.354512 | 0.000000 |          |
|  | 15 | H | 2.692108 | 2.238390 | 1.079562 | 4.364267 | 0.000000 |
|  | 16 | C | 3.344847 | 2.299548 | 1.432729 | 3.347329 | 2.247660 |
|  | 17 | H | 4.356128 | 3.344187 | 2.243080 | 4.358728 | 2.704447 |
|  | 18 | C | 3.348032 | 2.302838 | 2.309374 | 2.247176 | 3.352083 |
|  | 19 | H | 4.356992 | 3.345485 | 3.354097 | 2.701569 | 4.363764 |
|  | 20 | C | 2.230403 | 1.420208 | 2.310593 | 1.079903 | 3.353584 |
|  | 21 | S | 4.862032 | 4.237917 | 3.516946 | 5.325821 | 3.618449 |
|  | 22 | S | 3.237049 | 3.317766 | 3.631330 | 4.309806 | 3.829420 |
|  | 23 | C | 5.449566 | 5.061750 | 4.748875 | 5.843367 | 4.893262 |
|  | 24 | C | 4.895455 | 4.753635 | 4.787154 | 5.466492 | 4.963662 |
|  | 25 | H | 5.690622 | 5.676245 | 5.809100 | 6.278108 | 5.946000 |
|  | 26 | H | 6.533468 | 6.136465 | 5.753193 | 6.860092 | 5.841626 |
|  |    |   | 16       | 17       | 18       | 19       | 20       |
|  | 16 | C | 0.000000 |          |          |          |          |
|  | 17 | H | 1.080968 | 0.000000 |          |          |          |
|  | 18 | C | 1.413676 | 2.225759 | 0.000000 |          |          |
|  | 19 | H | 2.229200 | 2.684122 | 1.079774 | 0.000000 |          |
|  | 20 | C | 2.304554 | 3.349564 | 1.434833 | 2.243806 | 0.000000 |
|  | 21 | S | 3.368520 | 3.342040 | 4.036678 | 4.537889 | 4.511737 |
|  | 22 | S | 4.336168 | 5.030263 | 4.481728 | 5.266380 | 3.892684 |
|  | 23 | C | 4.788988 | 4.969632 | 5.122664 | 5.568456 | 5.273189 |
|  | 24 | C | 5.118063 | 5.556137 | 5.282356 | 5.842163 | 5.054218 |
|  | 25 | H | 6.193712 | 6.642874 | 6.299891 | 6.831002 | 5.976349 |
|  | 26 | H | 5.701720 | 5.748416 | 6.057975 | 6.406400 | 6.306673 |
|  |    |   | 21       | 22       | 23       | 24       | 25       |
|  | 21 | S | 0.000000 |          |          |          |          |
|  | 22 | S | 3.153071 | 0.000000 |          |          |          |
|  | 23 | C | 1.763111 | 2.728530 | 0.000000 |          |          |
|  | 24 | C | 2.729070 | 1.763841 | 1.375327 | 0.000000 |          |
|  | 25 | H | 3.724745 | 2.466776 | 2.140244 | 1.087089 | 0.000000 |
|  | 26 | H | 2.466369 | 3.724446 | 1.087071 | 2.139493 | 2.470175 |
|  |    |   | 26       |          |          |          |          |
|  | 26 | H | 0.000000 |          |          |          |          |



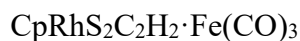

|                                                                                                              |          |          |          |          |          |          |
|--------------------------------------------------------------------------------------------------------------|----------|----------|----------|----------|----------|----------|
| 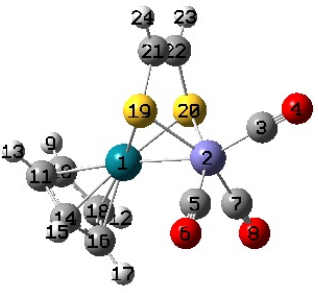 <p>1. -2780.479877 0.0</p> |          |          |          |          |          |          |
|                                                                                                              | 1 Rh     | 0.000000 |          |          |          |          |
|                                                                                                              | 2 Fe     | 2.471199 | 0.000000 |          |          |          |
|                                                                                                              | 3 C      | 4.160033 | 1.780161 | 0.000000 |          |          |
|                                                                                                              | 4 O      | 5.276636 | 2.919227 | 1.139207 | 0.000000 |          |
|                                                                                                              | 5 C      | 3.183691 | 1.763279 | 2.730011 | 3.674804 | 0.000000 |
|                                                                                                              | 6 O      | 3.984813 | 2.904245 | 3.694424 | 4.497021 | 1.141341 |
|                                                                                                              | 7 C      | 3.176105 | 1.762958 | 2.732971 | 3.678220 | 2.522704 |
|                                                                                                              | 8 O      | 3.974928 | 2.904052 | 3.698482 | 4.502169 | 3.438725 |
|                                                                                                              | 9 H      | 2.953381 | 5.283155 | 6.839655 | 7.893069 | 6.112582 |
|                                                                                                              | 10 C     | 2.213483 | 4.638210 | 6.310086 | 7.411728 | 5.245315 |
|                                                                                                              | 11 C     | 2.202027 | 4.584003 | 6.261198 | 7.364805 | 4.811750 |
|                                                                                                              | 12 H     | 2.914153 | 4.551668 | 6.161276 | 7.233836 | 5.238575 |
|                                                                                                              | 13 H     | 2.934025 | 5.189207 | 6.749926 | 7.805148 | 5.388572 |
|                                                                                                              | 14 C     | 2.177262 | 4.116324 | 5.849363 | 6.971503 | 3.898969 |
|                                                                                                              | 15 H     | 2.921316 | 4.423270 | 6.049697 | 7.128465 | 3.788793 |
|                                                                                                              | 16 C     | 2.209321 | 3.907675 | 5.677575 | 6.811179 | 3.872368 |
|                                                                                                              | 17 H     | 2.948752 | 4.020830 | 5.702578 | 6.799706 | 3.711385 |
|                                                                                                              | 18 C     | 2.176505 | 4.195292 | 5.916308 | 7.034365 | 4.706814 |
|                                                                                                              | 19 S     | 2.359249 | 2.317342 | 3.246629 | 4.153601 | 2.883446 |
|                                                                                                              | 20 S     | 2.359733 | 2.318588 | 3.242993 | 4.148220 | 3.985866 |
|                                                                                                              | 21 C     | 3.251783 | 3.166514 | 3.558126 | 4.220539 | 4.345961 |
|                                                                                                              | 22 C     | 3.252120 | 3.166420 | 3.555856 | 4.217324 | 4.715383 |
|                                                                                                              | 23 H     | 4.220979 | 4.127846 | 4.267389 | 4.739482 | 5.740867 |
| 24 H                                                                                                         | 4.220454 | 4.127818 | 4.270833 | 4.744791 | 5.144116 |          |
|                                                                                                              | 6        | 7        | 8        | 9        | 10       |          |
| 6 O                                                                                                          | 0.000000 |          |          |          |          |          |
| 7 C                                                                                                          | 3.439892 | 0.000000 |          |          |          |          |
| 8 O                                                                                                          | 4.172529 | 1.141457 | 0.000000 |          |          |          |
| 9 H                                                                                                          | 6.814748 | 5.611273 | 6.060013 | 0.000000 |          |          |
| 10 C                                                                                                         | 5.864425 | 4.938780 | 5.406385 | 1.079930 | 0.000000 |          |
| 11 C                                                                                                         | 5.245379 | 5.206604 | 5.835861 | 2.227273 | 1.410413 |          |
| 12 H                                                                                                         | 5.907349 | 4.010356 | 4.012969 | 2.704381 | 2.247885 |          |
| 13 H                                                                                                         | 5.772879 | 6.053464 | 6.775859 | 2.686994 | 2.225359 |          |
| 14 C                                                                                                         | 4.136897 | 4.549824 | 5.119090 | 3.355531 | 2.309277 |          |
| 15 H                                                                                                         | 3.744912 | 4.985086 | 5.601734 | 4.363165 | 3.350310 |          |
| 16 C                                                                                                         | 4.232313 | 3.781030 | 4.092656 | 3.362767 | 2.320889 |          |
| 17 H                                                                                                         | 3.921002 | 3.536778 | 3.642953 | 4.373264 | 3.365205 |          |
| 18 C                                                                                                         | 5.307728 | 4.015670 | 4.265868 | 2.250305 | 1.438971 |          |
| 19 S                                                                                                         | 3.661422 | 3.981707 | 5.087484 | 4.776976 | 4.248369 |          |
| 20 S                                                                                                         | 5.092370 | 2.887818 | 3.668023 | 3.994338 | 3.802050 |          |
| 21 C                                                                                                         | 5.273841 | 4.717150 | 5.778360 | 4.929098 | 4.774911 |          |
| 22 C                                                                                                         | 5.775165 | 4.349934 | 5.280609 | 4.611294 | 4.605919 |          |
| 23 H                                                                                                         | 6.817807 | 5.150100 | 5.987974 | 5.118618 | 5.305824 |          |
| 24 H                                                                                                         | 5.977869 | 5.742875 | 6.821430 | 5.664212 | 5.588189 |          |
|                                                                                                              | 11       | 12       | 13       | 14       | 15       |          |
| 11 C                                                                                                         | 0.000000 |          |          |          |          |          |
| 12 H                                                                                                         | 3.342162 | 0.000000 |          |          |          |          |

|                                                                                                                 |                                                                                                                                                                                                                                                                                                                                                                                                                                                                                                                                                                                                                                                                                                                                                                                                                                                                                                                                                                                                                                                                                                                                                                                             |
|-----------------------------------------------------------------------------------------------------------------|---------------------------------------------------------------------------------------------------------------------------------------------------------------------------------------------------------------------------------------------------------------------------------------------------------------------------------------------------------------------------------------------------------------------------------------------------------------------------------------------------------------------------------------------------------------------------------------------------------------------------------------------------------------------------------------------------------------------------------------------------------------------------------------------------------------------------------------------------------------------------------------------------------------------------------------------------------------------------------------------------------------------------------------------------------------------------------------------------------------------------------------------------------------------------------------------|
|                                                                                                                 | 13 H 1.080369 4.355824 0.000000<br>14 C 1.439781 3.341437 2.247997 0.000000<br>15 H 2.249376 4.354215 2.701604 1.080377 0.000000<br>16 C 2.315879 2.234790 3.357590 1.422950 2.237367<br>17 H 3.361794 2.692189 4.370095 2.238198 2.699209<br>18 C 2.299914 1.080636 3.346694 2.296813 3.342357<br>19 S 3.724370 5.249859 3.849774 3.717741 3.871379<br>20 S 4.320657 3.769733 4.893033 4.522786 5.248601<br>21 C 4.616034 5.784779 4.625649 5.030625 5.406128<br>22 C 4.841016 5.249592 5.043700 5.314686 5.898056<br>23 H 5.684325 5.884679 5.836028 6.283359 6.918809<br>24 H 5.308940 6.788614 5.120434 5.812036 6.089511<br>16 17 18 19 20<br>16 C 0.000000<br>17 H 1.080224 0.000000<br>18 C 1.422870 2.236394 0.000000<br>19 S 4.279200 4.826882 4.526461 0.000000<br>20 S 4.195697 4.682535 3.668388 2.990354 0.000000<br>21 C 5.445404 6.099644 5.251723 1.786890 2.674021<br>22 C 5.416742 6.049680 4.946887 2.673935 1.786734<br>23 H 6.333434 6.983527 5.704152 3.716862 2.477492<br>24 H 6.380896 7.067254 6.210340 2.477640 3.716944<br>21 22 23 24<br>21 C 0.000000<br>22 C 1.323409 0.000000<br>23 H 2.138376 1.084155 0.000000<br>24 H 1.084135 2.138498 2.567266 0.000000 |
| 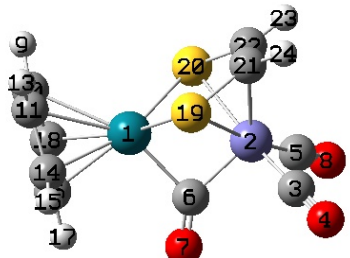 <p>2. -2780.469128 +6.7</p> | 1 2 3 4 5<br>1 Rh 0.000000<br>2 Fe 2.699627 0.000000<br>3 C 3.999124 1.745305 0.000000<br>4 O 4.997325 2.885465 1.140161 0.000000<br>5 C 4.000879 1.745313 2.492680 3.401716 0.000000<br>6 C 2.022288 1.883007 2.728645 3.645129 2.730279<br>7 O 2.922501 2.899348 3.316649 3.998816 3.318261<br>8 O 4.999780 2.885477 3.401699 4.120724 1.140165<br>9 H 3.170760 5.540000 7.052609 8.091767 6.568444<br>10 C 2.431028 5.031060 6.421060 7.411099 6.150375<br>11 C 2.430709 5.030250 6.146418 7.015967 6.422595<br>12 H 2.932391 5.010246 6.447078 7.457604 5.546826<br>13 H 3.170341 5.538651 6.563497 7.380843 7.053397<br>14 C 2.203179 4.654020 5.511659 6.274653 6.008287<br>15 H 2.932029 5.008249 5.540983 6.137747 6.446086<br>16 C 2.187722 4.552752 5.561281 6.394490 5.563428<br>17 H 2.841572 4.731440 5.536956 6.273807 5.538681<br>18 C 2.203626 4.655375 6.007925 6.986679 5.516209<br>19 S 2.368807 2.420804 3.028061 3.823774 4.159434<br>20 S 2.369152 2.421014 4.159824 5.298007 3.028655<br>21 C 3.273303 2.123622 2.962340 3.853477 3.490394<br>22 C 3.273374 2.123637 3.492015 4.527789 2.960749                                                                      |

|    |   |          |          |          |          |          |
|----|---|----------|----------|----------|----------|----------|
| 23 | H | 4.310747 | 2.868325 | 4.043832 | 4.994526 | 3.180905 |
| 24 | H | 4.310626 | 2.868418 | 3.183449 | 3.829532 | 4.041677 |
|    |   | 6        | 7        | 8        | 9        | 10       |
| 6  | C | 0.000000 |          |          |          |          |
| 7  | O | 1.172314 | 0.000000 |          |          |          |
| 8  | O | 3.647371 | 4.001332 | 0.000000 |          |          |
| 9  | H | 5.047275 | 5.744892 | 7.387560 | 0.000000 |          |
| 10 | C | 4.277697 | 4.888372 | 7.021461 | 1.080958 | 0.000000 |
| 11 | C | 4.276747 | 4.887337 | 7.413786 | 2.199473 | 1.378874 |
| 12 | H | 3.854865 | 4.091923 | 6.145646 | 2.712798 | 2.262405 |
| 13 | H | 5.045789 | 5.743258 | 8.093592 | 2.660949 | 2.199432 |
| 14 | C | 3.490982 | 3.849446 | 6.987966 | 3.344241 | 2.295320 |
| 15 | H | 3.852099 | 4.088540 | 7.457242 | 4.349013 | 3.332581 |
| 16 | C | 3.054313 | 3.170676 | 6.397820 | 3.362798 | 2.322938 |
| 17 | H | 2.969640 | 2.676219 | 6.276619 | 4.375778 | 3.369715 |
| 18 | C | 3.492784 | 3.851495 | 6.280819 | 2.259501 | 1.455511 |
| 19 | S | 3.012532 | 4.042943 | 5.297544 | 4.809862 | 4.264892 |
| 20 | S | 3.011608 | 4.041450 | 3.824468 | 3.805467 | 3.702561 |
| 21 | C | 3.632061 | 4.764724 | 4.525581 | 5.388744 | 5.122181 |
| 22 | C | 3.631676 | 4.764131 | 3.851291 | 5.040002 | 4.934934 |
| 23 | H | 4.504508 | 5.579441 | 3.825831 | 5.834815 | 5.851286 |
| 24 | H | 4.505134 | 5.580433 | 4.991397 | 6.376528 | 6.136968 |
|    |   | 11       | 12       | 13       | 14       | 15       |
| 11 | C | 0.000000 |          |          |          |          |
| 12 | H | 3.332484 | 0.000000 |          |          |          |
| 13 | H | 1.080963 | 4.348914 | 0.000000 |          |          |
| 14 | C | 1.455518 | 3.329639 | 2.259480 | 0.000000 |          |
| 15 | H | 2.262422 | 4.342136 | 2.712800 | 1.080731 | 0.000000 |
| 16 | C | 2.322882 | 2.230426 | 3.362749 | 1.418786 | 2.230464 |
| 17 | H | 3.369644 | 2.691206 | 4.375707 | 2.233963 | 2.691167 |
| 18 | C | 2.295193 | 1.080737 | 3.344119 | 2.284239 | 3.329629 |
| 19 | S | 3.700232 | 5.286547 | 3.802078 | 3.580973 | 3.713307 |
| 20 | S | 4.267039 | 3.712387 | 4.812854 | 4.503064 | 5.287013 |
| 21 | C | 4.934289 | 5.895825 | 5.039122 | 5.046971 | 5.368058 |
| 22 | C | 5.123012 | 5.367170 | 5.390063 | 5.348344 | 5.896525 |
| 23 | H | 6.138251 | 6.154939 | 6.378507 | 6.415310 | 6.980266 |
| 24 | H | 5.850142 | 6.979593 | 5.833158 | 5.954516 | 6.155807 |
|    |   | 16       | 17       | 18       | 19       | 20       |
| 16 | C | 0.000000 |          |          |          |          |
| 17 | H | 1.080191 | 0.000000 |          |          |          |
| 18 | C | 1.418743 | 2.233987 | 0.000000 |          |          |
| 19 | S | 4.232349 | 4.768754 | 4.502602 | 0.000000 |          |
| 20 | S | 4.231568 | 4.766840 | 3.581127 | 3.262180 | 0.000000 |
| 21 | C | 5.428535 | 5.949793 | 5.348029 | 1.760364 | 2.751735 |
| 22 | C | 5.428252 | 5.949112 | 5.046816 | 2.751648 | 1.760405 |
| 23 | H | 6.429937 | 6.919722 | 5.954481 | 3.755433 | 2.442723 |
| 24 | H | 6.430343 | 6.920783 | 6.414926 | 2.442648 | 3.755555 |
|    |   | 21       | 22       | 23       | 24       |          |
| 21 | C | 0.000000 |          |          |          |          |
| 22 | C | 1.371123 | 0.000000 |          |          |          |

|                                                                                                                |          |          |          |          |          |          |   |
|----------------------------------------------------------------------------------------------------------------|----------|----------|----------|----------|----------|----------|---|
|  <p>3. -2780.449273 +19.2</p> | 23 H     | 2.143899 | 1.084617 | 0.000000 |          |          |   |
|                                                                                                                | 24 H     | 1.084616 | 2.143971 | 2.494351 | 0.000000 |          |   |
|                                                                                                                |          |          | 1        | 2        | 3        | 4        | 5 |
|                                                                                                                | 1 Rh     | 0.000000 |          |          |          |          |   |
|                                                                                                                | 2 Fe     | 3.759090 | 0.000000 |          |          |          |   |
|                                                                                                                | 3 C      | 4.952064 | 1.780544 | 0.000000 |          |          |   |
|                                                                                                                | 4 C      | 3.832707 | 1.788837 | 2.837074 | 0.000000 |          |   |
|                                                                                                                | 5 O      | 4.245948 | 2.930955 | 3.821601 | 1.142779 | 0.000000 |   |
|                                                                                                                | 6 O      | 5.867467 | 2.922883 | 1.142457 | 3.813406 | 4.676661 |   |
|                                                                                                                | 7 C      | 5.287466 | 1.747541 | 2.532368 | 2.697856 | 3.668611 |   |
|                                                                                                                | 8 O      | 6.331638 | 2.890755 | 3.464541 | 3.646332 | 4.474113 |   |
|                                                                                                                | 9 H      | 2.917469 | 6.570074 | 7.849286 | 6.530617 | 6.710149 |   |
|                                                                                                                | 10 C     | 2.188885 | 5.938265 | 7.103856 | 5.799941 | 5.947756 |   |
|                                                                                                                | 11 C     | 2.195041 | 5.740324 | 6.597855 | 5.820461 | 6.104416 |   |
|                                                                                                                | 12 H     | 2.912754 | 5.912388 | 7.245762 | 5.154862 | 4.907476 |   |
|                                                                                                                | 13 H     | 2.931691 | 6.237511 | 6.976812 | 6.569253 | 6.972419 |   |
|                                                                                                                | 14 C     | 2.208545 | 5.233257 | 5.889573 | 5.068265 | 5.243176 |   |
|                                                                                                                | 15 H     | 2.933150 | 5.296861 | 5.619165 | 5.232397 | 5.465566 |   |
|                                                                                                                | 16 C     | 2.166108 | 5.069197 | 5.957488 | 4.465510 | 4.381270 |   |
|                                                                                                                | 17 H     | 2.894399 | 5.020772 | 5.785525 | 4.098610 | 3.798957 |   |
|                                                                                                                | 18 C     | 2.182619 | 5.560568 | 6.756709 | 5.016947 | 4.934968 |   |
|                                                                                                                | 19 S     | 2.327561 | 2.342935 | 2.999382 | 3.317921 | 4.204572 |   |
|                                                                                                                | 20 S     | 2.188001 | 3.285821 | 4.969476 | 3.495842 | 4.026059 |   |
|                                                                                                                | 21 C     | 3.309501 | 1.928283 | 3.001606 | 3.466953 | 4.532460 |   |
| 22 C                                                                                                           | 3.185965 | 2.058486 | 3.695272 | 3.066380 | 3.989972 |          |   |
| 23 H                                                                                                           | 4.165904 | 2.748092 | 4.309283 | 3.729502 | 4.607532 |          |   |
| 24 H                                                                                                           | 4.201041 | 2.734761 | 3.377689 | 4.427342 | 5.530083 |          |   |
|                                                                                                                |          | 6        | 7        | 8        | 9        | 10       |   |
| 6 O                                                                                                            | 0.000000 |          |          |          |          |          |   |
| 7 C                                                                                                            | 3.457922 | 0.000000 |          |          |          |          |   |
| 8 O                                                                                                            | 4.214735 | 1.143958 | 0.000000 |          |          |          |   |
| 9 H                                                                                                            | 8.752865 | 7.925300 | 8.860072 | 0.000000 |          |          |   |
| 10 C                                                                                                           | 7.962627 | 7.413641 | 8.414439 | 1.080426 | 0.000000 |          |   |
| 11 C                                                                                                           | 7.312963 | 7.364022 | 8.437760 | 2.247591 | 1.439039 |          |   |
| 12 H                                                                                                           | 8.187011 | 7.187164 | 8.098073 | 2.691452 | 2.231088 |          |   |
| 13 H                                                                                                           | 7.619851 | 7.844933 | 8.908808 | 2.702348 | 2.249389 |          |   |
| 14 C                                                                                                           | 6.524432 | 6.937754 | 8.055600 | 3.351101 | 2.309338 |          |   |
| 15 H                                                                                                           | 6.084666 | 7.042269 | 8.183310 | 4.362761 | 3.354775 |          |   |
| 16 C                                                                                                           | 6.709954 | 6.662514 | 7.733152 | 3.349412 | 2.302885 |          |   |
| 17 H                                                                                                           | 6.485317 | 6.555248 | 7.607007 | 4.359508 | 3.345883 |          |   |
| 18 C                                                                                                           | 7.638396 | 7.004165 | 7.997617 | 2.228270 | 1.413560 |          |   |
| 19 S                                                                                                           | 3.806833 | 3.972425 | 5.073807 | 5.047238 | 4.365135 |          |   |
| 20 S                                                                                                           | 6.074574 | 4.209600 | 5.024434 | 3.920913 | 3.688443 |          |   |
| 21 C                                                                                                           | 3.959088 | 2.915999 | 3.845604 | 5.771639 | 5.343409 |          |   |
| 22 C                                                                                                           | 4.795956 | 2.700625 | 3.518366 | 5.451555 | 5.124788 |          |   |
| 23 H                                                                                                           | 5.381497 | 2.695852 | 3.180255 | 6.146443 | 5.955932 |          |   |
| 24 H                                                                                                           | 4.144891 | 3.340182 | 4.087110 | 6.455719 | 6.109584 |          |   |
|                                                                                                                |          | 11       | 12       | 13       | 14       | 15       |   |
| 11 C                                                                                                           | 0.000000 |          |          |          |          |          |   |
| 12 H                                                                                                           | 3.357430 | 0.000000 |          |          |          |          |   |

|  |    |   |          |          |          |          |          |  |  |
|--|----|---|----------|----------|----------|----------|----------|--|--|
|  | 13 | H | 1.080083 | 4.365773 | 0.000000 |          |          |  |  |
|  | 14 | C | 1.417107 | 3.358961 | 2.232232 | 0.000000 |          |  |  |
|  | 15 | H | 2.230435 | 4.369005 | 2.690094 | 1.080393 | 0.000000 |  |  |
|  | 16 | C | 2.300051 | 2.249180 | 3.344734 | 1.423845 | 2.234530 |  |  |
|  | 17 | H | 3.343910 | 2.705396 | 4.355312 | 2.237498 | 2.691767 |  |  |
|  | 18 | C | 2.310888 | 1.080091 | 3.352340 | 2.316552 | 3.360489 |  |  |
|  | 19 | S | 3.777169 | 5.133851 | 4.067471 | 3.453756 | 3.450189 |  |  |
|  | 20 | S | 4.198725 | 3.664148 | 4.795366 | 4.378894 | 5.072860 |  |  |
|  | 21 | C | 5.071882 | 5.935021 | 5.300220 | 5.018024 | 5.174115 |  |  |
|  | 22 | C | 5.240202 | 5.287204 | 5.661777 | 5.237420 | 5.631819 |  |  |
|  | 23 | H | 6.191075 | 6.015573 | 6.576474 | 6.279807 | 6.709586 |  |  |
|  | 24 | H | 5.734505 | 6.907437 | 5.782816 | 5.792737 | 5.863756 |  |  |
|  |    |   | 16       | 17       | 18       | 19       | 20       |  |  |
|  | 16 | C | 0.000000 |          |          |          |          |  |  |
|  | 17 | H | 1.080537 | 0.000000 |          |          |          |  |  |
|  | 18 | C | 1.438846 | 2.249581 | 0.000000 |          |          |  |  |
|  | 19 | S | 3.853366 | 4.202730 | 4.415814 | 0.000000 |          |  |  |
|  | 20 | S | 3.973939 | 4.424113 | 3.542714 | 3.096654 | 0.000000 |  |  |
|  | 21 | C | 5.207686 | 5.547946 | 5.433552 | 1.773128 | 2.797377 |  |  |
|  | 22 | C | 5.070990 | 5.367575 | 5.029770 | 2.614941 | 1.786719 |  |  |
|  | 23 | H | 6.057673 | 6.342864 | 5.881336 | 3.649151 | 2.395036 |  |  |
|  | 24 | H | 6.146113 | 6.538192 | 6.360851 | 2.501483 | 3.695783 |  |  |
|  |    |   | 21       | 22       | 23       | 24       |          |  |  |
|  | 21 | C | 0.000000 |          |          |          |          |  |  |
|  | 22 | C | 1.422431 | 0.000000 |          |          |          |  |  |
|  | 23 | H | 2.167206 | 1.087820 | 0.000000 |          |          |  |  |
|  | 24 | H | 1.083839 | 2.257601 | 2.628581 | 0.000000 |          |  |  |

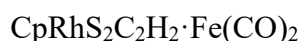

|                                                                                                            |    |          |          |          |          |          |          |  |  |  |
|------------------------------------------------------------------------------------------------------------|----|----------|----------|----------|----------|----------|----------|--|--|--|
| 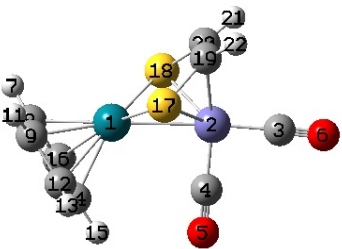<br>1. -2667.231223 0.0 |    | 1        | 2        | 3        | 4        | 5        |          |  |  |  |
|                                                                                                            | 1  | Rh       | 0.000000 |          |          |          |          |  |  |  |
|                                                                                                            | 2  | Fe       | 2.604125 | 0.000000 |          |          |          |  |  |  |
|                                                                                                            | 3  | C        | 4.349334 | 1.747412 | 0.000000 |          |          |  |  |  |
|                                                                                                            | 4  | C        | 3.047091 | 1.751447 | 2.470341 | 0.000000 |          |  |  |  |
|                                                                                                            | 5  | O        | 3.787401 | 2.899414 | 3.371756 | 1.148047 | 0.000000 |  |  |  |
|                                                                                                            | 6  | O        | 5.493942 | 2.893983 | 1.146947 | 3.358540 | 4.051094 |  |  |  |
|                                                                                                            | 7  | H        | 2.936198 | 5.356787 | 7.060613 | 5.704176 | 6.210083 |  |  |  |
|                                                                                                            | 8  | C        | 2.204296 | 4.739779 | 6.465708 | 4.884010 | 5.315470 |  |  |  |
|                                                                                                            | 9  | C        | 2.204440 | 4.740370 | 6.466533 | 4.884784 | 5.316268 |  |  |  |
|                                                                                                            | 10 | H        | 2.932969 | 4.615300 | 6.085395 | 4.236132 | 4.381859 |  |  |  |
|                                                                                                            | 11 | H        | 2.936304 | 5.357680 | 7.061949 | 5.705381 | 6.211357 |  |  |  |
|                                                                                                            | 12 | C        | 2.194172 | 4.297585 | 5.908287 | 4.006758 | 4.234718 |  |  |  |
|                                                                                                            | 13 | H        | 2.932937 | 4.616734 | 6.087662 | 4.238524 | 4.384574 |  |  |  |
|                                                                                                            | 14 | C        | 2.231955 | 4.048918 | 5.582616 | 3.398074 | 3.437394 |  |  |  |
| 15                                                                                                         | H  | 2.961911 | 4.132180 | 5.436925 | 3.034796 | 2.734592 |          |  |  |  |

|    |   |          |          |          |          |          |
|----|---|----------|----------|----------|----------|----------|
| 16 | C | 2.194184 | 4.296759 | 5.907040 | 4.005410 | 4.233224 |
| 17 | S | 2.280650 | 2.274335 | 3.600703 | 3.359171 | 4.320263 |
| 18 | S | 2.280662 | 2.274384 | 3.600285 | 3.359812 | 4.321174 |
| 19 | C | 3.155204 | 2.097629 | 2.953156 | 3.780489 | 4.910824 |
| 20 | C | 3.155182 | 2.097620 | 2.952918 | 3.780710 | 4.911146 |
| 21 | H | 4.199893 | 2.854148 | 3.154931 | 4.486970 | 5.595116 |
| 22 | H | 4.199924 | 2.854193 | 3.155382 | 4.486673 | 5.594647 |
|    |   | 6        | 7        | 8        | 9        | 10       |
| 6  | O | 0.000000 |          |          |          |          |
| 7  | H | 8.189360 | 0.000000 |          |          |          |
| 8  | C | 7.600909 | 1.080012 | 0.000000 |          |          |
| 9  | C | 7.601838 | 2.230773 | 1.415945 | 0.000000 |          |
| 10 | H | 7.108501 | 2.701932 | 2.245515 | 3.347263 | 0.000000 |
| 11 | H | 8.190901 | 2.690644 | 2.230719 | 1.080009 | 4.359988 |
| 12 | C | 6.992229 | 3.350455 | 2.304551 | 1.435505 | 3.340237 |
| 13 | H | 7.111136 | 4.359920 | 3.347160 | 2.245424 | 4.351643 |
| 14 | C | 6.633488 | 3.358836 | 2.316601 | 2.316636 | 2.234241 |
| 15 | H | 6.390045 | 4.370119 | 3.361406 | 3.361404 | 2.693121 |
| 16 | C | 6.990801 | 2.247019 | 1.435560 | 2.304651 | 1.080553 |
| 17 | S | 4.632612 | 4.878652 | 4.258937 | 3.685845 | 5.179550 |
| 18 | S | 4.632043 | 3.890306 | 3.684799 | 4.258276 | 3.582721 |
| 19 | C | 3.875776 | 5.513600 | 5.136954 | 4.943152 | 5.767212 |
| 20 | C | 3.875472 | 5.165320 | 4.942771 | 5.136726 | 5.220762 |
| 21 | H | 3.827577 | 6.012542 | 5.889896 | 6.180438 | 6.003878 |
| 22 | H | 3.828185 | 6.543919 | 6.180796 | 5.890431 | 6.842414 |
|    |   | 11       | 12       | 13       | 14       | 15       |
| 11 | H | 0.000000 |          |          |          |          |
| 12 | C | 2.247053 | 0.000000 |          |          |          |
| 13 | H | 2.701946 | 1.080556 | 0.000000 |          |          |
| 14 | C | 3.358901 | 1.422349 | 2.234270 | 0.000000 |          |
| 15 | H | 4.370145 | 2.236702 | 2.693058 | 1.080309 | 0.000000 |
| 16 | C | 3.350526 | 2.295590 | 3.340238 | 1.422324 | 2.236738 |
| 17 | S | 3.892064 | 3.506446 | 3.582045 | 4.049739 | 4.509937 |
| 18 | S | 4.877431 | 4.436291 | 5.179937 | 4.050696 | 4.511646 |
| 19 | C | 5.165848 | 4.964626 | 5.220338 | 5.215394 | 5.630486 |
| 20 | C | 5.513065 | 5.274140 | 5.767119 | 5.215690 | 5.631051 |
| 21 | H | 6.543152 | 6.341576 | 6.842418 | 6.204157 | 6.564172 |
| 22 | H | 6.013364 | 5.876246 | 6.003392 | 6.203718 | 6.563319 |
|    |   | 16       | 17       | 18       | 19       | 20       |
| 16 | C | 0.000000 |          |          |          |          |
| 17 | S | 4.436062 | 0.000000 |          |          |          |
| 18 | S | 3.506774 | 3.216320 | 0.000000 |          |          |
| 19 | C | 5.274198 | 1.731910 | 2.727418 | 0.000000 |          |
| 20 | C | 4.964831 | 2.727360 | 1.731930 | 1.380180 | 0.000000 |
| 21 | H | 5.876470 | 3.722611 | 2.427781 | 2.143264 | 1.084505 |
| 22 | H | 6.341585 | 2.427798 | 3.722664 | 1.084504 | 2.143268 |
|    |   | 21       | 22       |          |          |          |
| 21 | H | 0.000000 |          |          |          |          |
| 22 | H | 2.476081 | 0.000000 |          |          |          |

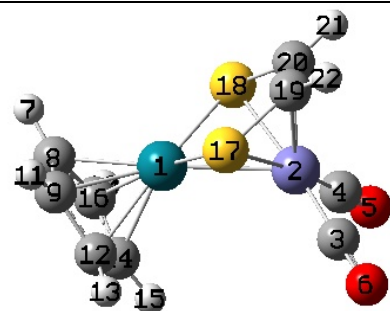

3. -2667.216735 +9.1

|      | 1        | 2        | 3        | 4        | 5        |
|------|----------|----------|----------|----------|----------|
| 1 Rh | 0.000000 |          |          |          |          |
| 2 Fe | 2.603442 | 0.000000 |          |          |          |
| 3 C  | 3.799496 | 1.743965 | 0.000000 |          |          |
| 4 C  | 3.760327 | 1.743429 | 2.408551 | 0.000000 |          |
| 5 O  | 4.728935 | 2.890702 | 3.293542 | 1.147435 | 0.000000 |
| 6 O  | 4.781510 | 2.891039 | 1.147270 | 3.292263 | 3.955404 |
| 7 H  | 2.957769 | 5.415983 | 6.750943 | 6.279293 | 7.040670 |
| 8 C  | 2.213389 | 4.765763 | 5.943033 | 5.638947 | 6.420490 |
| 9 C  | 2.203963 | 4.716414 | 5.577581 | 5.862948 | 6.763666 |
| 10 H | 2.910169 | 4.638125 | 5.844368 | 4.774090 | 5.204471 |
| 11 H | 2.943618 | 5.332819 | 6.130296 | 6.657332 | 7.626472 |
| 12 C | 2.171294 | 4.225781 | 4.741818 | 5.217211 | 6.059112 |
| 13 H | 2.908175 | 4.506358 | 4.634384 | 5.565359 | 6.424542 |
| 14 C | 2.184274 | 3.978140 | 4.648519 | 4.518677 | 5.176231 |
| 15 H | 2.911800 | 4.036279 | 4.433013 | 4.234835 | 4.725966 |
| 16 C | 2.174064 | 4.302588 | 5.404191 | 4.787656 | 5.407935 |
| 17 S | 2.291599 | 2.306895 | 2.966284 | 4.042105 | 5.187014 |
| 18 S | 2.295142 | 2.302561 | 4.043311 | 2.959231 | 3.802698 |
| 19 C | 3.251038 | 2.092264 | 3.079544 | 3.608173 | 4.695496 |
| 20 C | 3.254889 | 2.089133 | 3.573863 | 3.112433 | 4.072034 |
| 21 H | 4.286749 | 2.893118 | 4.229815 | 3.484760 | 4.246826 |
| 22 H | 4.281951 | 2.893097 | 3.428889 | 4.274258 | 5.301029 |
|      | 6        | 7        | 8        | 9        | 10       |
| 6 O  | 0.000000 |          |          |          |          |
| 7 H  | 7.726017 | 0.000000 |          |          |          |
| 8 C  | 6.858027 | 1.080071 | 0.000000 |          |          |
| 9 C  | 6.357018 | 2.231865 | 1.416946 | 0.000000 |          |
| 10 H | 6.765553 | 2.703562 | 2.245139 | 3.345914 | 0.000000 |
| 11 H | 6.864601 | 2.689974 | 2.230607 | 1.080363 | 4.358578 |
| 12 C | 5.381558 | 3.353931 | 2.308685 | 1.434036 | 3.344270 |
| 13 H | 5.069847 | 4.363449 | 3.351427 | 2.246052 | 4.355135 |
| 14 C | 5.363772 | 3.361140 | 2.318321 | 2.314995 | 2.234912 |
| 15 H | 5.017535 | 4.371496 | 3.362140 | 3.359524 | 2.692565 |
| 16 C | 6.291926 | 2.246250 | 1.433734 | 2.302411 | 1.080479 |
| 17 S | 3.811539 | 4.820625 | 4.230717 | 3.666529 | 5.182748 |
| 18 S | 5.189549 | 3.994327 | 3.751086 | 4.298812 | 3.582564 |
| 19 C | 4.029642 | 5.637974 | 5.246875 | 5.056106 | 5.807113 |
| 20 C | 4.652318 | 5.351820 | 5.088238 | 5.272814 | 5.254456 |
| 21 H | 5.240744 | 6.184446 | 6.017528 | 6.306409 | 6.008506 |
| 22 H | 4.171073 | 6.641720 | 6.266926 | 5.970890 | 6.886698 |
|      | 11       | 12       | 13       | 14       | 15       |
| 11 H | 0.000000 |          |          |          |          |
| 12 C | 2.244332 | 0.000000 |          |          |          |
| 13 H | 2.701410 | 1.080235 | 0.000000 |          |          |
| 14 C | 3.357704 | 1.425772 | 2.237264 | 0.000000 |          |
| 15 H | 4.368864 | 2.239830 | 2.696744 | 1.079667 | 0.000000 |
| 16 C | 3.348102 | 2.300416 | 3.344762 | 1.425076 | 2.238813 |
| 17 S | 3.843039 | 3.552943 | 3.653680 | 4.097298 | 4.590287 |
| 18 S | 4.931052 | 4.429406 | 5.155121 | 4.009457 | 4.438722 |

|  |      |          |          |          |          |          |
|--|------|----------|----------|----------|----------|----------|
|  | 19 C | 5.295246 | 5.041218 | 5.284865 | 5.250114 | 5.636252 |
|  | 20 C | 5.679549 | 5.338498 | 5.808464 | 5.222189 | 5.583889 |
|  | 21 H | 6.707303 | 6.396272 | 6.880055 | 6.192516 | 6.496447 |
|  | 22 H | 6.100463 | 5.933201 | 6.047920 | 6.235576 | 6.577930 |
|  |      | 16       | 17       | 18       | 19       | 20       |
|  | 16 C | 0.000000 |          |          |          |          |
|  | 17 S | 4.446470 | 0.000000 |          |          |          |
|  | 18 S | 3.517620 | 3.143069 | 0.000000 |          |          |
|  | 19 C | 5.337591 | 1.748760 | 2.715825 | 0.000000 |          |
|  | 20 C | 5.027813 | 2.718608 | 1.750119 | 1.375328 | 0.000000 |
|  | 21 H | 5.915987 | 3.736887 | 2.441054 | 2.163106 | 1.083352 |
|  | 22 H | 6.399426 | 2.437805 | 3.734508 | 1.083423 | 2.161862 |
|  |      | 21       | 22       |          |          |          |
|  | 21 H | 0.000000 |          |          |          |          |
|  | 22 H | 2.546754 | 0.000000 |          |          |          |



**Table S8.** Harmonic  $\nu(\text{CO})$  vibrational frequencies and infrared intensities (in parantheses, in  $\text{km/mol}$ ) for the  $\text{CpH}_2\text{C}_2\text{S}_2\text{M}_1\text{M}_2(\text{CO})_n$  systems.

|                  |                                                     |
|------------------|-----------------------------------------------------|
| <b>Co-Cr</b>     |                                                     |
| <b>2-1-co-cr</b> | 1885(629) 1935(1414)                                |
| <b>3-1-co-cr</b> | 1908(626) 1934(692) 1977(1542)                      |
| <b>4-1-co-cr</b> | 1872(511) 1939(882) 1970(551) 2018(1199)            |
| <b>4-2-co-cr</b> | 1816(363) 1951(558) 1957(825) 2012(1232)            |
| <b>4-3-co-cr</b> | 1931(1247) 1933(883) 1947(279) 2012(1081)           |
| <b>5-1-co-cr</b> | 1887(498) 1943(1004) 1971(767) 1988(511) 2039(943)  |
| <b>5-2-co-cr</b> | 1948(1345) 1957(797) 1963(1322) 1983(37) 2052(417)  |
| <b>5-3-co-cr</b> | 1934(926) 1951(1068) 1963(324) 2011(1219) 2046(663) |
|                  |                                                     |
| <b>Co-Fe</b>     |                                                     |
| <b>2-1-co-fe</b> | 1941(538) 1987(1284)                                |
| <b>2-2-co-fe</b> | 1946(602) 1996(1220)                                |
| <b>3-1-co-fe</b> | 1973(573) 1983(672) 2037(821)                       |
| <b>3-2-co-fe</b> | 1825(405) 1977(592) 2026(1065)                      |
| <b>3-3-co-fe</b> | 1968(710) 1971(709) 2028(1000)                      |
| <b>4-1-co-fe</b> | 1975(667) 1988(713) 2003(652) 2055(663)             |
| <b>4-2-co-fe</b> | 1761(275) 1981(642) 1988(708) 2041(1022)            |
| <b>4-3-co-fe</b> | 1780(402) 1996(583) 1999(620) 2054(935)             |
| <b>4-4-co-fe</b> | 1984(933) 1989(1060) 1998(306) 2061(620)            |
| <b>4-5-co-fe</b> | 1761(275) 1981(642) 1988(709) 2042(1022)            |
|                  |                                                     |
| <b>Ir-Cr</b>     |                                                     |
| <b>2-1-ir-cr</b> | 1880(634) 1927(1448)                                |
| <b>3-1-ir-cr</b> | 1903(645) 1926(685) 1970(1615)                      |
| <b>4-1-ir-cr</b> | 1859(472) 1914(740) 1957(642) 2004(1264)            |
| <b>4-2-ir-cr</b> | 1847(496) 1932(905) 1963(537) 2013(1202)            |
| <b>4-3-ir-cr</b> | 1926(939) 1927(1283) 1941(355) 2011(886)            |
| <b>5-1-ir-cr</b> | 1881(533) 1940(1031) 1968(741) 1982(543) 2035(983)  |
| <b>5-2-ir-cr</b> | 1950(1430) 1954(810) 1959(1334) 1982(5) 2052(375)   |
| <b>5-3-ir-cr</b> | 1929(914) 1941(1122) 1955(333) 2006(1053) 2040(737) |
|                  |                                                     |
| <b>Ir-Fe</b>     |                                                     |
| <b>2-1-ir-fe</b> | 1936(537) 1982(1314)                                |
| <b>2-2-ir-fe</b> | 1939(590) 1988(1205)                                |
| <b>3-1-ir-fe</b> | 1971(574) 1980(679) 2035(861)                       |
| <b>3-2-ir-fe</b> | 1807(417) 1974(595) 2022(1083)                      |
| <b>3-3-ir-fe</b> | 1966(682) 1967(776) 2026(935)                       |
| <b>4-1-ir-fe</b> | 1974(676) 1981(685) 1999(668)                       |
| <b>4-2-ir-fe</b> | 1980(928) 1988(1019) 1996(425) 2060(562)            |
| <b>4-3-ir-fe</b> | 1738(300) 1977(651) 1984(719) 2039(1051)            |
| <b>4-4-ir-fe</b> | 1755(416) 1989(590) 1994(624) 2050(974)             |
| <b>4-5-ir-fe</b> | 1817(378) 1977(489) 1998(878) 2054(658)             |
|                  |                                                     |

|                  |                                                     |
|------------------|-----------------------------------------------------|
| <b>Rh-Cr</b>     |                                                     |
| <b>2-1-rh-cr</b> | 1884(614) 1932(1443)                                |
| <b>2-2-rh-cr</b> | 1899(742) 1936(1525)                                |
| <b>3-1-rh-cr</b> | 1906(620) 1931(668) 1973(1644)                      |
| <b>4-1-rh-cr</b> | 1868(510) 1935(893) 1967(533) 2016(1247)            |
| <b>4-2-rh-cr</b> | 1817(375) 1952(538) 1956(828) 2013(1230)            |
| <b>4-3-rh-cr</b> | 1928(1224) 1930(940) 1943(329) 2010(1078)           |
| <b>5-1-rh-cr</b> | 1894(545) 1943(1006) 1969(766) 1985(518) 2037(981)  |
| <b>5-2-rh-cr</b> | 1950(1406) 1954(802) 1960(1329) 1982(9) 2052(397)   |
| <b>5-3-rh-cr</b> | 1932(959) 1943(1111) 1954(261) 2005(1334) 2043(655) |
| <b>5-4-rh-cr</b> | 1836(350) 1965(725) 1969(1022) 1979(523) 2036(964)  |
|                  |                                                     |
| <b>Rh-Fe</b>     |                                                     |
| <b>2-1-rh-fe</b> | 1940(526) 1985(1316)                                |
| <b>2-2-rh-fe</b> | 1943(584) 1992(1233)                                |
| <b>3-1-rh-fe</b> | 1973(571) 1982(660) 2036(877)                       |
| <b>3-2-rh-fe</b> | 1828(411) 1978(587) 2026(1081)                      |
| <b>3-3-rh-fe</b> | 1968(706) 1969(693) 2026(1075)                      |
| <b>4-1-rh-fe</b> | 1974(646) 1984(657) 2001(689) 2053(708)             |
| <b>4-2-rh-fe</b> | 1762(291) 1981(634) 1988(702) 2042(1068)            |
| <b>4-3-rh-fe</b> | 1777(416) 1995(560) 1998(615) 2054(985)             |
| <b>4-4-rh-fe</b> | 1980(936) 1988(1020) 1995(400) 2059(616)            |
| <b>4-5-rh-fe</b> | 1844(367) 1981(492) 2000(863) 2056(685)             |

**Table S9.** CO dissociation energies for the CpH<sub>2</sub>C<sub>2</sub>S<sub>2</sub>M<sub>1</sub>M<sub>2</sub>(CO)<sub>n</sub> systems.

| <b>Reaction</b>               | <b>ΔE, kcal/mol</b> | <b>ΔG, kcal/mol</b> |
|-------------------------------|---------------------|---------------------|
| <b>CoCr5-1 → CoCr4-1 + CO</b> | <b>18.3</b>         | <b>7.3</b>          |
| <b>CoCr4-1 → CoCr3-1 + CO</b> | <b>9.8</b>          | <b>-0.2</b>         |
| <b>CoCr3-1 → CoCr2-1 + CO</b> | <b>48.6</b>         | <b>38.8</b>         |
|                               |                     |                     |
| <b>CoFe4-1 → CoFe3-1 + CO</b> | <b>8.6</b>          | <b>-1.8</b>         |
| <b>CoFe3-1 → CoFe2-1 + CO</b> | <b>28.3</b>         | <b>18.6</b>         |
|                               |                     |                     |
| <b>IrCr5-1 → IrCr4-1 + CO</b> | <b>22.6</b>         | <b>11.8</b>         |
| <b>IrCr4-1 → IrCr3-1 + CO</b> | <b>9.6</b>          | <b>0</b>            |
| <b>IrCr3-1 → IrCr2-1 + CO</b> | <b>47.7</b>         | <b>37.2</b>         |
|                               |                     |                     |
| <b>IrFe4-1 → IrFe3-1 + CO</b> | <b>16.2</b>         | <b>5.6</b>          |
| <b>IrFe3-1 → IrFe2-1 + CO</b> | <b>24.3</b>         | <b>15.1</b>         |
|                               |                     |                     |
| <b>RhCr5-1 → RhCr4-1 + CO</b> | <b>22.6</b>         | <b>11.5</b>         |
| <b>RhCr4-1 → RhCr3-1 + CO</b> | <b>8.9</b>          | <b>-0.5</b>         |
| <b>RhCr3-1 → RhCr2-1 + CO</b> | <b>46.1</b>         | <b>35.7</b>         |
|                               |                     |                     |
| <b>RhFe4-1 → RhFe3-1 + CO</b> | <b>13.9</b>         | <b>3.3</b>          |
| <b>RhFe3-1 → RhFe2-1 + CO</b> | <b>24.5</b>         | <b>15.3</b>         |

Complete Gaussian09 Reference (reference 19):

Gaussian 09, Revision E.01, M. J. Frisch, G. W. Trucks, H. B. Schlegel, G. E. Scuseria, M. A. Robb, J. R. Cheeseman, G. Scalmani, V. Barone, B. Mennucci, G. A. Petersson, H. Nakatsuji, M. Caricato, X. Li, H. P. Hratchian, A. F. Izmaylov, J. Bloino, G. Zheng, J. L. Sonnenberg, M. Hada, M. Ehara, K. Toyota, R. Fukuda, J. Hasegawa, M. Ishida, T. Nakajima, Y. Honda, O. Kitao, H. Nakai, T. Vreven, J. A. Montgomery, Jr., J. E. Peralta, F. Ogliaro, M. Bearpark, J. J. Heyd, E. Brothers, K. N. Kudin, V. N. Staroverov, R. Kobayashi, J. Normand, K. Raghavachari, A. Rendell, J. C. Burant, S. S. Iyengar, J. Tomasi, M. Cossi, N. Rega, J. M. Millam, M. Klene, J. E. Knox, J. B. Cross, V. Bakken, C. Adamo, J. Jaramillo, R. Gomperts, R. E. Stratmann, O. Yazyev, A. J. Austin, R. Cammi, C. Pomelli, J. W. Ochterski, R. L. Martin, K. Morokuma, V. G. Zakrzewski, G. A. Voth, P. Salvador, J. J. Dannenberg, S. Dapprich, A. D. Daniels, O. Farkas, J. B. Foresman, J. V. Ortiz, J. Cioslowski, and D. J. Fox, Gaussian, Inc., Wallingford CT, 2009.
